# Supplementary material for: Identification of RNA Binding Proteins Associated with Dengue Virus RNA in Infected Cells Reveals Temporally Distinct Host Factor Requirements
Source: PLoS Negl Trop Dis. 2016 Aug 24;10(8):e0004921. doi: 10.1371/journal.pntd.0004921 (PMC4996428; doi:10.1371/journal.pntd.0004921)
Supplement: S1 Dataset — (A). Table containing all proteins quantified by qTUX-MS, including proteins enriched in DENV infection (red highlighted rows) and those that did not meet the specificity threshold. For each protein group, the following are provided (from left to right), UniProt Accession number, gene name, protein name, the linear and Log2 DENV/Mock qTUX-MS enrichment ratios (columns D and E), the qTUX-MS ratio variability, the number of qTUX-MS quantified peptides, the average Log2 DENV/Mock whole cell relative abundance SILAC ratio, whether this ratio was up (U) or down (D) regulated by more than ± 1.75-fold, the average SILAC ratio variability, the average number of quantified peptides, the number of razor+unique peptides and sequence coverage for qTUX-MS, the protein’s molecular weight and sequence length, and the complete FASTA header entry for the primary protein group member. Columns H–K are cross-referenced from the respective whole cell data (B). ND = not detected. (B) Table containing all proteins quantified in whole cell lysates by SILAC. For each protein group, the following are provided (from left to right), UniProt Accession number, gene name, protein name, the Log2 DENV/Mock relative abundance ratios for replicates 1, 2, and the average (columns D and E), whether this ratio was up (U) or down (D) regulated by more than ± 1.75-fold. For each replicate, the following are provide: the SILAC ratio variability, the number of quantified peptides, the number of razor+unique peptides, and the number of unique peptides, total protein intensity for light (DENV) and heavy (MOCK) conditions, and the overall sequence coverage. The complete FASTA header entry is listed for the primary protein group accession number. (XLSX) [file pntd.0004921.s004.xlsx]

## Sheet: (A) qTUX-MS
Majority protein IDs	Gene names	Protein name	Norm DENV/Mock Ratio, qTUX-MS	Norm Log2 DENV/Mock Ratio, qTUX-MS	Ratio variability [%], qTUX-MS	Ratio count, qTUX-MS	Log2 DENV/Mock, Whole Cell Avg	Differential Expression (±1.75-fold)	Ratio variability [%], Whole Cell Avg	Ratio count, Whole Cell Avg	Razor + unique peptides, qTUX-MS	Sequence coverage [%], qTUX-MS	Mol. weight [kDa]	Sequence length	Fasta headers
P13489	RNH1	Ribonuclease inhibitor	46.571	5.54136	174.95	47	0.544736		17.5785	140	18	78.3	49.973	461	>sp|P13489|RINI_HUMAN Ribonuclease inhibitor OS=Homo sapiens GN=RNH1 PE=1 SV=2
P14337	POL	Genome polyprotein	7.15416	2.83878	55.96	5	3.1023	U	133.373	21.5	11	37	379.39	3391	>sp|P14337|POLG_DEN28 Genome polyprotein OS=Dengue virus type 2 (isolate Thailand/0168/1979) PE=1 SV=2
P31946	YWHAB	14-3-3 protein beta/alpha;14-3-3 protein beta/alpha, N-terminally processed	5.39055	2.43043	14.899	4	0.478959		19.724	112.5	5	54.5	28.082	246	>sp|P31946|1433B_HUMAN 14-3-3 protein beta/alpha OS=Homo sapiens GN=YWHAB PE=1 SV=3
P19387	POLR2C	DNA-directed RNA polymerase II subunit RPB3	5.36179	2.42271	32.859	3	0.335714		22.618	45.5	3	20.7	31.441	275	>sp|P19387|RPB3_HUMAN DNA-directed RNA polymerase II subunit RPB3 OS=Homo sapiens GN=POLR2C PE=1 SV=2
Q03252	LMNB2	Lamin-B2	4.87039	2.28404	15.966	3	-0.0345008		17.9575	231.5	4	17.3	67.688	600	>sp|Q03252|LMNB2_HUMAN Lamin-B2 OS=Homo sapiens GN=LMNB2 PE=1 SV=3
P27797	CALR	Calreticulin	4.50999	2.17312	37.054	13	0.105508		23.4045	726	9	63.5	48.141	417	>sp|P27797|CALR_HUMAN Calreticulin OS=Homo sapiens GN=CALR PE=1 SV=1
Q9BUF5	TUBB6	Tubulin beta-6 chain	4.35554	2.12285	25.293	20	0.465144		19.8845	133	5	39.2	49.857	446	>sp|Q9BUF5|TBB6_HUMAN Tubulin beta-6 chain OS=Homo sapiens GN=TUBB6 PE=1 SV=1
P27824	CANX	Calnexin	4.32759	2.11356	19.281	3	-0.195551		26.038	456.5	3	30.6	67.567	592	>sp|P27824|CALX_HUMAN Calnexin OS=Homo sapiens GN=CANX PE=1 SV=2
P02545	LMNA	Prelamin-A/C;Lamin-A/C	4.28275	2.09854	56.18	5	-0.233675		22.3805	489.5	9	55.9	74.139	664	>sp|P02545|LMNA_HUMAN Prelamin-A/C OS=Homo sapiens GN=LMNA PE=1 SV=1
P62979	RPS27A	Ubiquitin-40S ribosomal protein S27a;Ubiquitin;40S ribosomal protein S27a;Ubiquitin-60S ribosomal protein L40;Ubiquitin;60S ribosomal protein L40;Polyubiquitin-B;Ubiquitin;Polyubiquitin-C;Ubiquitin	4.13555	2.04808	26.854	10	0.0490206		18.169	131	3	42.3	17.965	156	>sp|P62979|RS27A_HUMAN Ubiquitin-40S ribosomal protein S27a OS=Homo sapiens GN=RPS27A PE=1 SV=2;>sp|P62987|RL40_HUMAN Ubiquitin-60S ribosomal protein L40 OS=Homo sapiens GN=UBA52 PE=1 SV=2;>sp|P0CG47|UBB_HUMAN Polyubiquitin-B OS=Homo sapiens GN=UBB PE=1 SV
P08195	SLC3A2	4F2 cell-surface antigen heavy chain	4.09034	2.03222	15.277	6	0.100288		19.2955	241.5	5	40.5	67.993	630	>sp|P08195|4F2_HUMAN 4F2 cell-surface antigen heavy chain OS=Homo sapiens GN=SLC3A2 PE=1 SV=3
Q13509	TUBB3	Tubulin beta-3 chain	3.9349	1.97633	22.828	13	0.668233		25.311	65.5	5	38.7	50.432	450	>sp|Q13509|TBB3_HUMAN Tubulin beta-3 chain OS=Homo sapiens GN=TUBB3 PE=1 SV=2
Q9UHX1	PUF60	Poly(U)-binding-splicing factor PUF60	3.82822	1.93667	18.183	10	0.206942		21.941	184	4	33.8	59.875	559	>sp|Q9UHX1|PUF60_HUMAN Poly(U)-binding-splicing factor PUF60 OS=Homo sapiens GN=PUF60 PE=1 SV=1
Q9GZL7	WDR12	Ribosome biogenesis protein WDR12	3.79309	1.92337	34.571	3	-0.118607		19.056	103.5	3	22.2	47.707	423	>sp|Q9GZL7|WDR12_HUMAN Ribosome biogenesis protein WDR12 OS=Homo sapiens GN=WDR12 PE=1 SV=2
P63104	YWHAZ	14-3-3 protein zeta/delta	3.76191	1.91146	12.835	4	0.478563		22.6455	181.5	4	66.9	27.745	245	>sp|P63104|1433Z_HUMAN 14-3-3 protein zeta/delta OS=Homo sapiens GN=YWHAZ PE=1 SV=1
P12004	PCNA	Proliferating cell nuclear antigen	3.75584	1.90914	18.471	6	0.428662		15.813	192.5	4	55.6	28.768	261	>sp|P12004|PCNA_HUMAN Proliferating cell nuclear antigen OS=Homo sapiens GN=PCNA PE=1 SV=1
P56537	EIF6	Eukaryotic translation initiation factor 6	3.49966	1.80721	18.471	8	0.324375		17.063	114	4	32.7	26.599	245	>sp|P56537|IF6_HUMAN Eukaryotic translation initiation factor 6 OS=Homo sapiens GN=EIF6 PE=1 SV=1
P84090	ERH	Enhancer of rudimentary homolog	3.39444	1.76317	19.387	8	-0.010052		16.1295	53	3	37.5	12.259	104	>sp|P84090|ERH_HUMAN Enhancer of rudimentary homolog OS=Homo sapiens GN=ERH PE=1 SV=1
Q9H0U4	RAB1B	Ras-related protein Rab-1B	3.28585	1.71627	41.268	4	-0.127032		21.1695	219.5	2	62.2	22.171	201	>sp|Q9H0U4|RAB1B_HUMAN Ras-related protein Rab-1B OS=Homo sapiens GN=RAB1B PE=1 SV=1
Q9BQ67	GRWD1	Glutamate-rich WD repeat-containing protein 1	3.27514	1.71156	22.575	3	0.0546212		18.559	121	3	20	49.419	446	>sp|Q9BQ67|GRWD1_HUMAN Glutamate-rich WD repeat-containing protein 1 OS=Homo sapiens GN=GRWD1 PE=1 SV=1
Q08188	TGM3	Protein-glutamine gamma-glutamyltransferase E;Protein-glutamine gamma-glutamyltransferase E 50 kDa catalytic chain;Protein-glutamine gamma-glutamyltransferase E 27 kDa non-catalytic chain	3.23831	1.69524	115.03	6	ND		ND	ND	8	16.3	76.631	693	>sp|Q08188|TGM3_HUMAN Protein-glutamine gamma-glutamyltransferase E OS=Homo sapiens GN=TGM3 PE=1 SV=4
Q12905	ILF2	Interleukin enhancer-binding factor 2	3.16669	1.66297	16.783	4	-0.0889131		19.813	286	3	56.2	43.062	390	>sp|Q12905|ILF2_HUMAN Interleukin enhancer-binding factor 2 OS=Homo sapiens GN=ILF2 PE=1 SV=2
P29692	EEF1D	Elongation factor 1-delta	3.0879	1.62662	27.336	7	0.300435		18.9235	194	3	37.7	31.121	281	>sp|P29692|EF1D_HUMAN Elongation factor 1-delta OS=Homo sapiens GN=EEF1D PE=1 SV=5
Q9BVA1	TUBB2B	Tubulin beta-2B chain	3.06061	1.61382	23.099	8	0.681423		22.195	469	2	46.3	49.953	445	>sp|Q9BVA1|TBB2B_HUMAN Tubulin beta-2B chain OS=Homo sapiens GN=TUBB2B PE=1 SV=1
P61981	YWHAG	14-3-3 protein gamma;14-3-3 protein gamma, N-terminally processed	2.99445	1.58229	95.288	4	0.50079		25.7355	96.5	3	52.2	28.302	247	>sp|P61981|1433G_HUMAN 14-3-3 protein gamma OS=Homo sapiens GN=YWHAG PE=1 SV=2
P55209	NAP1L1	Nucleosome assembly protein 1-like 1	2.97602	1.57338	37.017	6	0.543297		17.338	188.5	2	21.5	45.374	391	>sp|P55209|NP1L1_HUMAN Nucleosome assembly protein 1-like 1 OS=Homo sapiens GN=NAP1L1 PE=1 SV=1
P62258	YWHAE	14-3-3 protein epsilon	2.91708	1.54452	24.745	4	0.561076		18.86	286.5	3	60.4	29.174	255	>sp|P62258|1433E_HUMAN 14-3-3 protein epsilon OS=Homo sapiens GN=YWHAE PE=1 SV=1
O75223	GGCT	Gamma-glutamylcyclotransferase	2.89402	1.53308	148.83	3	0.767608		14.1655	25.5	4	26.6	21.007	188	>sp|O75223|GGCT_HUMAN Gamma-glutamylcyclotransferase OS=Homo sapiens GN=GGCT PE=1 SV=1
Q9BWJ5	SF3B5	Splicing factor 3B subunit 5	2.8287	1.50014	23.991	3	0.00576605		38.797	31	1	17.4	10.135	86	>sp|Q9BWJ5|SF3B5_HUMAN Splicing factor 3B subunit 5 OS=Homo sapiens GN=SF3B5 PE=1 SV=1
P31944	CASP14	Caspase-14;Caspase-14 subunit p19;Caspase-14 subunit p10	2.73774	1.45299	105.67	10	ND		ND	ND	6	18.6	27.679	242	>sp|P31944|CASPE_HUMAN Caspase-14 OS=Homo sapiens GN=CASP14 PE=1 SV=2
P68371	TUBB4B	Tubulin beta-4B chain	2.7338	1.45091	25.981	100	0.6396		14.9245	247.5	21	54.8	49.83	445	>sp|P68371|TBB4B_HUMAN Tubulin beta-4B chain OS=Homo sapiens GN=TUBB4B PE=1 SV=1
O75531	BANF1	Barrier-to-autointegration factor;Barrier-to-autointegration factor, N-terminally processed	2.70494	1.4356	23.234	4	-0.0127889		27.3445	60	4	47.2	10.058	89	>sp|O75531|BAF_HUMAN Barrier-to-autointegration factor OS=Homo sapiens GN=BANF1 PE=1 SV=1
Q6UN15	FIP1L1	Pre-mRNA 3-end-processing factor FIP1	2.63676	1.39877	59.131	3	-0.0271295		16.4475	67	2	7.4	66.526	594	>sp|Q6UN15|FIP1_HUMAN Pre-mRNA 3-end-processing factor FIP1 OS=Homo sapiens GN=FIP1L1 PE=1 SV=1
P29508	SERPINB3	Serpin B3	2.62367	1.39159	166.87	7	ND		ND	ND	6	18.7	44.564	390	>sp|P29508|SPB3_HUMAN Serpin B3 OS=Homo sapiens GN=SERPINB3 PE=1 SV=2
Q9UMS4	PRPF19	Pre-mRNA-processing factor 19	2.54397	1.34708	21.097	3	0.0707846		19.1935	179.5	3	56	55.18	504	>sp|Q9UMS4|PRP19_HUMAN Pre-mRNA-processing factor 19 OS=Homo sapiens GN=PRPF19 PE=1 SV=1
P07437	TUBB	Tubulin beta chain	2.49725	1.32034	17.706	29	0.697133		14.4605	168	4	51.1	49.67	444	>sp|P07437|TBB5_HUMAN Tubulin beta chain OS=Homo sapiens GN=TUBB PE=1 SV=2
Q15393	SF3B3	Splicing factor 3B subunit 3	2.4855	1.31354	25.05	53	-0.108608		21.523	303.5	19	26.7	135.58	1217	>sp|Q15393|SF3B3_HUMAN Splicing factor 3B subunit 3 OS=Homo sapiens GN=SF3B3 PE=1 SV=4
O75934	BCAS2	Pre-mRNA-splicing factor SPF27	2.43392	1.28328	32.128	4	-0.036887		19.6765	76	3	23.1	26.131	225	>sp|O75934|SPF27_HUMAN Pre-mRNA-splicing factor SPF27 OS=Homo sapiens GN=BCAS2 PE=1 SV=1
P04040	CAT	Catalase	2.41137	1.26985	115.87	3	-0.0241309		22.597	268	3	29.6	59.755	527	>sp|P04040|CATA_HUMAN Catalase OS=Homo sapiens GN=CAT PE=1 SV=3
P06576	ATP5B	ATP synthase subunit beta, mitochondrial	2.38345	1.25305	28.67	8	-0.463063		20.447	717	5	67.9	56.559	529	>sp|P06576|ATPB_HUMAN ATP synthase subunit beta, mitochondrial OS=Homo sapiens GN=ATP5B PE=1 SV=3
Q8IWX8	CHERP	Calcium homeostasis endoplasmic reticulum protein	2.37505	1.24796	28.391	5	-0.069333		21.599	157	5	8.3	103.7	916	>sp|Q8IWX8|CHERP_HUMAN Calcium homeostasis endoplasmic reticulum protein OS=Homo sapiens GN=CHERP PE=1 SV=3
P52434	POLR2H	DNA-directed RNA polymerases I, II, and III subunit RPABC3	2.36279	1.24049	24.66	4	0.154812		17.44	15	3	30.7	17.143	150	>sp|P52434|RPAB3_HUMAN DNA-directed RNA polymerases I, II, and III subunit RPABC3 OS=Homo sapiens GN=POLR2H PE=1 SV=4
Q07021	C1QBP	Complement component 1 Q subcomponent-binding protein, mitochondrial	2.31707	1.2123	32.36	3	-0.126922		18.6165	239.5	3	42.9	31.362	282	>sp|Q07021|C1QBP_HUMAN Complement component 1 Q subcomponent-binding protein, mitochondrial OS=Homo sapiens GN=C1QBP PE=1 SV=1
P04792	HSPB1	Heat shock protein beta-1	2.29395	1.19783	40.712	29	1.29828	U	18.8445	150	10	64.4	22.782	205	>sp|P04792|HSPB1_HUMAN Heat shock protein beta-1 OS=Homo sapiens GN=HSPB1 PE=1 SV=2
P06748	NPM1	Nucleophosmin	2.26847	1.18172	39.921	20	0.0977014		33.2265	475.5	7	44.6	32.575	294	>sp|P06748|NPM_HUMAN Nucleophosmin OS=Homo sapiens GN=NPM1 PE=1 SV=2
Q8N7H5	PAF1	RNA polymerase II-associated factor 1 homolog	2.25748	1.17471	35.493	3	0.0760816		19.899	52	3	10	59.975	531	>sp|Q8N7H5|PAF1_HUMAN RNA polymerase II-associated factor 1 homolog OS=Homo sapiens GN=PAF1 PE=1 SV=2
Q96FZ2	HMCES	Embryonic stem cell-specific 5-hydroxymethylcytosine-binding protein	2.25153	1.1709	46.162	17	0.671844		32.13	6.5	9	29.4	40.574	354	>sp|Q96FZ2|CC037_HUMAN UPF0361 protein C3orf37 OS=Homo sapiens GN=C3orf37 PE=1 SV=1
P38919	EIF4A3	Eukaryotic initiation factor 4A-III;Eukaryotic initiation factor 4A-III, N-terminally processed	2.22311	1.15258	6.4464	3	0.0817836		20.963	197.5	3	45.3	46.871	411	>sp|P38919|IF4A3_HUMAN Eukaryotic initiation factor 4A-III OS=Homo sapiens GN=EIF4A3 PE=1 SV=4
Q09028	RBBP4	Histone-binding protein RBBP4	2.18576	1.12813	22.737	15	0.269894		16.827	138.5	8	29.2	47.655	425	>sp|Q09028|RBBP4_HUMAN Histone-binding protein RBBP4 OS=Homo sapiens GN=RBBP4 PE=1 SV=3
P28066	PSMA5	Proteasome subunit alpha type-5	2.16791	1.11631	50.694	3	0.416889		16.3675	140	3	60.6	26.411	241	>sp|P28066|PSA5_HUMAN Proteasome subunit alpha type-5 OS=Homo sapiens GN=PSMA5 PE=1 SV=3
Q04837	SSBP1	Single-stranded DNA-binding protein, mitochondrial	2.10195	1.07173	40.372	49	-0.188557		10.655	106	9	54.7	17.259	148	>sp|Q04837|SSBP_HUMAN Single-stranded DNA-binding protein, mitochondrial OS=Homo sapiens GN=SSBP1 PE=1 SV=1
P08238	HSP90AB1	Heat shock protein HSP 90-beta	2.0943	1.06647	27.136	14	0.540398		22.8935	505	6	47.4	83.263	724	>sp|P08238|HS90B_HUMAN Heat shock protein HSP 90-beta OS=Homo sapiens GN=HSP90AB1 PE=1 SV=4
P10909	CLU	Clusterin;Clusterin beta chain;Clusterin alpha chain	2.02321	1.01665	4.533	6	0.16833		28.5065	65.5	3	13.8	52.494	449	>sp|P10909|CLUS_HUMAN Clusterin OS=Homo sapiens GN=CLU PE=1 SV=1
Q16576	RBBP7	Histone-binding protein RBBP7	1.99161	0.993933	29.38	3	0.339323		26.5835	74.5	4	26.1	47.82	425	>sp|Q16576|RBBP7_HUMAN Histone-binding protein RBBP7 OS=Homo sapiens GN=RBBP7 PE=1 SV=1
Q15758	SLC1A5	Neutral amino acid transporter B(0)	1.97686	0.98321	48.184	3	-0.285953		14.8805	64.5	1	14	56.598	541	>sp|Q15758|AAAT_HUMAN Neutral amino acid transporter B(0) OS=Homo sapiens GN=SLC1A5 PE=1 SV=2
P11021	HSPA5	78 kDa glucose-regulated protein	1.97579	0.982431	50.303	10	0.192834		23.902	867.5	7	54.9	72.332	654	>sp|P11021|GRP78_HUMAN 78 kDa glucose-regulated protein OS=Homo sapiens GN=HSPA5 PE=1 SV=2
P68363	TUBA1B	Tubulin alpha-1B chain	1.97374	0.98093	29.443	49	0.547143		16.9265	625	18	61	50.151	451	>sp|P68363|TBA1B_HUMAN Tubulin alpha-1B chain OS=Homo sapiens GN=TUBA1B PE=1 SV=1
P07900	HSP90AA1	Heat shock protein HSP 90-alpha	1.92713	0.946457	28.499	4	0.468701		24.945	778	3	48.2	84.659	732	>sp|P07900|HS90A_HUMAN Heat shock protein HSP 90-alpha OS=Homo sapiens GN=HSP90AA1 PE=1 SV=5
P83916	CBX1	Chromobox protein homolog 1	1.92244	0.942936	26.297	3	0.08806		31.3935	45	2	23.8	21.418	185	>sp|P83916|CBX1_HUMAN Chromobox protein homolog 1 OS=Homo sapiens GN=CBX1 PE=1 SV=1
P10599	TXN	Thioredoxin	1.91704	0.938883	14.307	3	0.511397		15.0869	69	3	62.9	11.737	105	>sp|P10599|THIO_HUMAN Thioredoxin OS=Homo sapiens GN=TXN PE=1 SV=3
P14625	HSP90B1	Endoplasmin	1.91261	0.935542	30.123	6	-0.10317		21.64	826	4	52.7	92.468	803	>sp|P14625|ENPL_HUMAN Endoplasmin OS=Homo sapiens GN=HSP90B1 PE=1 SV=1
Q15365	PCBP1	Poly(rC)-binding protein 1	1.91011	0.933659	36.16	11	0.313979		20.4425	283.5	5	45.5	37.497	356	>sp|Q15365|PCBP1_HUMAN Poly(rC)-binding protein 1 OS=Homo sapiens GN=PCBP1 PE=1 SV=2
Q13185	CBX3	Chromobox protein homolog 3	1.90182	0.927382	11.067	4	0.106837		14.9795	116	4	30.1	20.811	183	>sp|Q13185|CBX3_HUMAN Chromobox protein homolog 3 OS=Homo sapiens GN=CBX3 PE=1 SV=4
P61326	MAGOH	Protein mago nashi homolog	1.88705	0.916131	23.672	8	0.18		22.036	72	3	43.2	17.163	146	>sp|P61326|MGN_HUMAN Protein mago nashi homolog OS=Homo sapiens GN=MAGOH PE=1 SV=1
P52272	HNRNPM	Heterogeneous nuclear ribonucleoprotein M	1.87593	0.907605	39.806	9	-0.118446		31.3385	707	9	45.5	77.515	730	>sp|P52272|HNRPM_HUMAN Heterogeneous nuclear ribonucleoprotein M OS=Homo sapiens GN=HNRNPM PE=1 SV=3
Q13347	EIF3I	Eukaryotic translation initiation factor 3 subunit I	1.85421	0.890807	27.884	4	0.450054		22.633	120.5	5	37.8	36.501	325	>sp|Q13347|EIF3I_HUMAN Eukaryotic translation initiation factor 3 subunit I OS=Homo sapiens GN=EIF3I PE=1 SV=1
Q9BQE3	TUBA1C	Tubulin alpha-1C chain	1.84806	0.886013	5.9955	3	0.331095		17.5655	84.5	2	60.8	49.895	449	>sp|Q9BQE3|TBA1C_HUMAN Tubulin alpha-1C chain OS=Homo sapiens GN=TUBA1C PE=1 SV=1
P62306	SNRPF	Small nuclear ribonucleoprotein F	1.84367	0.882584	7.5701	3	0.127222		14.5815	30	2	24.4	9.7251	86	>sp|P62306|RUXF_HUMAN Small nuclear ribonucleoprotein F OS=Homo sapiens GN=SNRPF PE=1 SV=1
Q9NS69	TOMM22	Mitochondrial import receptor subunit TOM22 homolog	1.84321	0.882221	9.3391	3	-0.219423		16.714	89	3	66.2	15.521	142	>sp|Q9NS69|TOM22_HUMAN Mitochondrial import receptor subunit TOM22 homolog OS=Homo sapiens GN=TOMM22 PE=1 SV=3
P52597	HNRNPF	Heterogeneous nuclear ribonucleoprotein F;Heterogeneous nuclear ribonucleoprotein F, N-terminally processed	1.8407	0.880251	26.708	11	0.0923097		18.6315	216	5	42.4	45.671	415	>sp|P52597|HNRPF_HUMAN Heterogeneous nuclear ribonucleoprotein F OS=Homo sapiens GN=HNRNPF PE=1 SV=3
Q15233	NONO	Non-POU domain-containing octamer-binding protein	1.82308	0.866381	26.81	3	0.00819436		25.52	383.5	2	42.3	54.231	471	>sp|Q15233|NONO_HUMAN Non-POU domain-containing octamer-binding protein OS=Homo sapiens GN=NONO PE=1 SV=4
P43686	PSMC4	26S protease regulatory subunit 6B	1.81264	0.858092	32.202	3	0.425801		22.8775	184	2	39	47.366	418	>sp|P43686|PRS6B_HUMAN 26S protease regulatory subunit 6B OS=Homo sapiens GN=PSMC4 PE=1 SV=2
Q12906	ILF3	Interleukin enhancer-binding factor 3	1.80772	0.854169	37.158	4	-0.0467684		20.9975	426.5	3	17.6	95.337	894	>sp|Q12906|ILF3_HUMAN Interleukin enhancer-binding factor 3 OS=Homo sapiens GN=ILF3 PE=1 SV=3
Q9UBR2	CTSZ	Cathepsin Z	1.80136	0.849089	18.807	5	0.0694304		17.762	22.5	5	21.5	33.868	303	>sp|Q9UBR2|CATZ_HUMAN Cathepsin Z OS=Homo sapiens GN=CTSZ PE=1 SV=1
Q15029	EFTUD2	116 kDa U5 small nuclear ribonucleoprotein component	1.78867	0.838884	25.593	25	-0.170618		25.5405	325	16	41.9	109.43	972	>sp|Q15029|U5S1_HUMAN 116 kDa U5 small nuclear ribonucleoprotein component OS=Homo sapiens GN=EFTUD2 PE=1 SV=1
P26599	PTBP1	Polypyrimidine tract-binding protein 1	1.78617	0.836871	17.839	3	-0.0576247		17.0095	276.5	3	35.8	57.221	531	>sp|P26599|PTBP1_HUMAN Polypyrimidine tract-binding protein 1 OS=Homo sapiens GN=PTBP1 PE=1 SV=1
Q6NZY4	ZCCHC8	Zinc finger CCHC domain-containing protein 8	1.77528	0.82805	27.697	7	-0.0556077		20.595	40.5	5	7.5	78.576	707	>sp|Q6NZY4|ZCHC8_HUMAN Zinc finger CCHC domain-containing protein 8 OS=Homo sapiens GN=ZCCHC8 PE=1 SV=2
Q96AE4	FUBP1	Far upstream element-binding protein 1	1.7563	0.812543	43.297	4	-0.0175111		31.8555	138.5	2	25	67.56	644	>sp|Q96AE4|FUBP1_HUMAN Far upstream element-binding protein 1 OS=Homo sapiens GN=FUBP1 PE=1 SV=3
P23246	SFPQ	Splicing factor, proline- and glutamine-rich	1.75486	0.811357	18.937	7	-0.0788117		27.3175	452	3	26	76.149	707	>sp|P23246|SFPQ_HUMAN Splicing factor, proline- and glutamine-rich OS=Homo sapiens GN=SFPQ PE=1 SV=2
Q92945	KHSRP	Far upstream element-binding protein 2	1.73543	0.795295	18.244	10	0.0798142		20.931	419	5	45.4	73.114	711	>sp|Q92945|FUBP2_HUMAN Far upstream element-binding protein 2 OS=Homo sapiens GN=KHSRP PE=1 SV=4
Q9Y3F4	STRAP	Serine-threonine kinase receptor-associated protein	1.72179	0.78391	29.054	4	0.278289		18.737	150.5	4	46.6	38.438	350	>sp|Q9Y3F4|STRAP_HUMAN Serine-threonine kinase receptor-associated protein OS=Homo sapiens GN=STRAP PE=1 SV=1
Q08211	DHX9	ATP-dependent RNA helicase A	1.71591	0.778975	21.498	3	-0.155077		24.642	562	4	28.9	140.96	1270	>sp|Q08211|DHX9_HUMAN ATP-dependent RNA helicase A OS=Homo sapiens GN=DHX9 PE=1 SV=4
P05023	ATP1A1	Sodium/potassium-transporting ATPase subunit alpha-1	1.70043	0.765898	11.705	5	-0.309156		18.812	571	5	41.5	112.89	1023	>sp|P05023|AT1A1_HUMAN Sodium/potassium-transporting ATPase subunit alpha-1 OS=Homo sapiens GN=ATP1A1 PE=1 SV=1
O14579	COPE	Coatomer subunit epsilon	1.66594	0.736337	20.212	7	0.228802		16.873	115	6	48.1	34.482	308	>sp|O14579|COPE_HUMAN Coatomer subunit epsilon OS=Homo sapiens GN=COPE PE=1 SV=3
P11047	LAMC1	Laminin subunit gamma-1	1.66459	0.735165	102.08	3	-0.11653		21.123	198	4	8.4	177.6	1609	>sp|P11047|LAMC1_HUMAN Laminin subunit gamma-1 OS=Homo sapiens GN=LAMC1 PE=1 SV=3
P53634	CTSC	Dipeptidyl peptidase 1;Dipeptidyl peptidase 1 exclusion domain chain;Dipeptidyl peptidase 1 heavy chain;Dipeptidyl peptidase 1 light chain	1.60015	0.678207	32.153	8	0.477904		29.1545	112.5	4	11.9	51.853	463	>sp|P53634|CATC_HUMAN Dipeptidyl peptidase 1 OS=Homo sapiens GN=CTSC PE=1 SV=2
O00165	HAX1	HCLS1-associated protein X-1	1.59126	0.670167	35.713	12	0.247034		21.1535	36.5	6	29	31.62	279	>sp|O00165|HAX1_HUMAN HCLS1-associated protein X-1 OS=Homo sapiens GN=HAX1 PE=1 SV=2
P11142	HSPA8	Heat shock cognate 71 kDa protein	1.58545	0.664892	46.348	9	0.387292		18.5495	702	7	53.7	70.897	646	>sp|P11142|HSP7C_HUMAN Heat shock cognate 71 kDa protein OS=Homo sapiens GN=HSPA8 PE=1 SV=1
P35222	CTNNB1	Catenin beta-1	1.5743	0.654709	22.629	4	-0.0286668		19.131	153	4	23.8	85.496	781	>sp|P35222|CTNB1_HUMAN Catenin beta-1 OS=Homo sapiens GN=CTNNB1 PE=1 SV=1
P43243	MATR3	Matrin-3	1.52998	0.613517	40.193	4	-0.072048		27.52	488	4	29.3	94.622	847	>sp|P43243|MATR3_HUMAN Matrin-3 OS=Homo sapiens GN=MATR3 PE=1 SV=2
Q13200	PSMD2	26S proteasome non-ATPase regulatory subunit 2	1.52839	0.61201	67.389	8	0.201655		20.7205	238	5	23.5	100.2	908	>sp|Q13200|PSMD2_HUMAN 26S proteasome non-ATPase regulatory subunit 2 OS=Homo sapiens GN=PSMD2 PE=1 SV=3
Q96HQ2	CDKN2AIPNL	CDKN2AIP N-terminal-like protein	1.52145	0.605443	4.1858	3	-0.199714		19.232	30	2	24.1	13.196	116	>sp|Q96HQ2|C2AIL_HUMAN CDKN2AIP N-terminal-like protein OS=Homo sapiens GN=CDKN2AIPNL PE=1 SV=1
P14866	HNRNPL	Heterogeneous nuclear ribonucleoprotein L	1.51251	0.596946	45.27	7	-0.00522085		21.419	377	6	40.6	64.132	589	>sp|P14866|HNRPL_HUMAN Heterogeneous nuclear ribonucleoprotein L OS=Homo sapiens GN=HNRNPL PE=1 SV=2
P27487	DPP4	Dipeptidyl peptidase 4;Dipeptidyl peptidase 4 membrane form;Dipeptidyl peptidase 4 soluble form	1.50456	0.589346	14.293	3	-0.366911		18.4725	235.5	1	29.2	88.278	766	>sp|P27487|DPP4_HUMAN Dipeptidyl peptidase 4 OS=Homo sapiens GN=DPP4 PE=1 SV=2
Q10570	CPSF1	Cleavage and polyadenylation specificity factor subunit 1	1.43466	0.520706	30.951	5	-0.168052		17.485	145.5	4	4.9	160.88	1443	>sp|Q10570|CPSF1_HUMAN Cleavage and polyadenylation specificity factor subunit 1 OS=Homo sapiens GN=CPSF1 PE=1 SV=2
P12956	XRCC6	X-ray repair cross-complementing protein 6	1.4256	0.511569	22.454	5	0.107124		19.436	509.5	3	50.2	69.842	609	>sp|P12956|XRCC6_HUMAN X-ray repair cross-complementing protein 6 OS=Homo sapiens GN=XRCC6 PE=1 SV=2
P31943	HNRNPH1	Heterogeneous nuclear ribonucleoprotein H;Heterogeneous nuclear ribonucleoprotein H, N-terminally processed	1.40945	0.495131	27.633	25	-0.013281		17.5685	478.5	10	44.3	49.229	449	>sp|P31943|HNRH1_HUMAN Heterogeneous nuclear ribonucleoprotein H OS=Homo sapiens GN=HNRNPH1 PE=1 SV=4
Q92841	DDX17	Probable ATP-dependent RNA helicase DDX17	1.39495	0.480212	18.808	9	-0.00933128		18.18	312	7	33.5	80.272	729	>sp|Q92841|DDX17_HUMAN Probable ATP-dependent RNA helicase DDX17 OS=Homo sapiens GN=DDX17 PE=1 SV=2
P14314	PRKCSH	Glucosidase 2 subunit beta	1.3787	0.463311	13.879	3	0.192547		19.268	247.5	3	26.5	59.425	528	>sp|P14314|GLU2B_HUMAN Glucosidase 2 subunit beta OS=Homo sapiens GN=PRKCSH PE=1 SV=2
Q15427	SF3B4	Splicing factor 3B subunit 4	1.36486	0.448754	0.48421	3	0.0917356		17.0605	47.5	2	10.8	44.385	424	>sp|Q15427|SF3B4_HUMAN Splicing factor 3B subunit 4 OS=Homo sapiens GN=SF3B4 PE=1 SV=1
O00264	PGRMC1	Membrane-associated progesterone receptor component 1	1.36348	0.447295	36.56	10	0.0306796		17.1265	72.5	5	48.2	21.671	195	>sp|O00264|PGRC1_HUMAN Membrane-associated progesterone receptor component 1 OS=Homo sapiens GN=PGRMC1 PE=1 SV=3
Q15717	ELAVL1	ELAV-like protein 1	1.34945	0.432367	34.521	5	0.0390666		18.046	143.5	2	24.8	36.091	326	>sp|Q15717|ELAV1_HUMAN ELAV-like protein 1 OS=Homo sapiens GN=ELAVL1 PE=1 SV=2
Q01105	SET	Protein SET	1.34881	0.431684	16.095	22	0.669627		18.925	101	6	25.5	33.488	290	>sp|Q01105|SET_HUMAN Protein SET OS=Homo sapiens GN=SET PE=1 SV=3
P61978	HNRNPK	Heterogeneous nuclear ribonucleoprotein K	1.34703	0.429787	32.866	19	-0.0058883		20.117	510	10	53.6	50.976	463	>sp|P61978|HNRPK_HUMAN Heterogeneous nuclear ribonucleoprotein K OS=Homo sapiens GN=HNRNPK PE=1 SV=1
P38159	RBMX	RNA-binding motif protein, X chromosome;RNA-binding motif protein, X chromosome, N-terminally processed;RNA binding motif protein, X-linked-like-1	1.32263	0.403413	8.6133	4	-0.0975884		17.7535	234	2	25.6	42.331	391	>sp|P38159|RBMX_HUMAN RNA-binding motif protein, X chromosome OS=Homo sapiens GN=RBMX PE=1 SV=3;>sp|Q96E39|RMXL1_HUMAN RNA binding motif protein, X-linked-like-1 OS=Homo sapiens GN=RBMXL1 PE=1 SV=1
P07858	CTSB	Cathepsin B;Cathepsin B light chain;Cathepsin B heavy chain	1.321	0.401627	23.231	15	0.136831		20.363	86.5	6	16.8	37.821	339	>sp|P07858|CATB_HUMAN Cathepsin B OS=Homo sapiens GN=CTSB PE=1 SV=3
P55735	SEC13	Protein SEC13 homolog	1.31584	0.395986	16.776	7	0.241538		24.6385	66	4	34.8	35.54	322	>sp|P55735|SEC13_HUMAN Protein SEC13 homolog OS=Homo sapiens GN=SEC13 PE=1 SV=3
P35613	BSG	Basigin	1.29516	0.373132	9.2316	4	0.190906		18.3585	209.5	4	33.8	42.2	385	>sp|P35613|BASI_HUMAN Basigin OS=Homo sapiens GN=BSG PE=1 SV=2
P22735	TGM1	Protein-glutamine gamma-glutamyltransferase K	1.27935	0.355414	86.643	5	ND		ND	ND	5	7.6	89.786	817	>sp|P22735|TGM1_HUMAN Protein-glutamine gamma-glutamyltransferase K OS=Homo sapiens GN=TGM1 PE=1 SV=4
P09651	HNRNPA1;HNRNPA1L2	Heterogeneous nuclear ribonucleoprotein A1;Heterogeneous nuclear ribonucleoprotein A1, N-terminally processed;Heterogeneous nuclear ribonucleoprotein A1-like 2	1.26981	0.344616	26.496	20	-0.0953301		24.3345	491.5	8	43	38.746	372	>sp|P09651|ROA1_HUMAN Heterogeneous nuclear ribonucleoprotein A1 OS=Homo sapiens GN=HNRNPA1 PE=1 SV=5;>sp|Q32P51|RA1L2_HUMAN Heterogeneous nuclear ribonucleoprotein A1-like 2 OS=Homo sapiens GN=HNRNPA1L2 PE=2 SV=2
P60842	EIF4A1	Eukaryotic initiation factor 4A-I	1.24993	0.321851	36.903	3	0.448191		23.8795	264.5	4	58.6	46.153	406	>sp|P60842|IF4A1_HUMAN Eukaryotic initiation factor 4A-I OS=Homo sapiens GN=EIF4A1 PE=1 SV=1
P42704	LRPPRC	Leucine-rich PPR motif-containing protein, mitochondrial	1.24281	0.313607	42.405	16	-0.715543		24.4945	814	12	44.3	157.9	1394	>sp|P42704|LPPRC_HUMAN Leucine-rich PPR motif-containing protein, mitochondrial OS=Homo sapiens GN=LRPPRC PE=1 SV=3
Q00839	HNRNPU	Heterogeneous nuclear ribonucleoprotein U	1.23494	0.304436	25.522	41	-0.131565		29.6425	651	14	32	90.583	825	>sp|Q00839|HNRPU_HUMAN Heterogeneous nuclear ribonucleoprotein U OS=Homo sapiens GN=HNRNPU PE=1 SV=6
O43707	ACTN4	Alpha-actinin-4	1.22975	0.298366	39.777	31	-0.0872105		19.1835	926.5	13	60.6	104.85	911	>sp|O43707|ACTN4_HUMAN Alpha-actinin-4 OS=Homo sapiens GN=ACTN4 PE=1 SV=2
P19022	CDH2	Cadherin-2	1.22432	0.291976	12.816	5	-0.0624427		25.5175	112	3	10.9	99.808	906	>sp|P19022|CADH2_HUMAN Cadherin-2 OS=Homo sapiens GN=CDH2 PE=1 SV=4
Q16643	DBN1	Drebrin	1.20161	0.264972	45.601	5	-0.104977		25.3695	221	4	35.4	71.428	649	>sp|Q16643|DREB_HUMAN Drebrin OS=Homo sapiens GN=DBN1 PE=1 SV=4
Q13765	NACA	Nascent polypeptide-associated complex subunit alpha	1.18401	0.243687	25.174	9	0.695942		27.2505	55	2	32.6	23.384	215	>sp|Q13765|NACA_HUMAN Nascent polypeptide-associated complex subunit alpha OS=Homo sapiens GN=NACA PE=1 SV=1
P08670	VIM	Vimentin	1.17132	0.228141	26.992	130	-0.818264	D	29.855	935.5	35	73	53.651	466	>sp|P08670|VIME_HUMAN Vimentin OS=Homo sapiens GN=VIM PE=1 SV=4
Q6ZN17	LIN28B	Protein lin-28 homolog B	1.17009	0.226625	17.917	3	0.109782		12.7445	90.5	2	45.2	27.083	250	>sp|Q6ZN17|LN28B_HUMAN Protein lin-28 homolog B OS=Homo sapiens GN=LIN28B PE=1 SV=1
Q01082	SPTBN1	Spectrin beta chain, non-erythrocytic 1	1.1251	0.170048	21.897	7	-0.281108		22.4295	1880	7	51.6	274.61	2364	>sp|Q01082|SPTB2_HUMAN Spectrin beta chain, non-erythrocytic 1 OS=Homo sapiens GN=SPTBN1 PE=1 SV=2
P07910	HNRNPC	Heterogeneous nuclear ribonucleoproteins C1/C2	1.12101	0.164801	28.897	22	0.061917		19.8685	351.5	9	42.2	33.67	306	>sp|P07910|HNRPC_HUMAN Heterogeneous nuclear ribonucleoproteins C1/C2 OS=Homo sapiens GN=HNRNPC PE=1 SV=4
O43390	HNRNPR	Heterogeneous nuclear ribonucleoprotein R	1.09519	0.131182	28.93	4	-0.00535981		26.9265	308	4	35.2	70.942	633	>sp|O43390|HNRPR_HUMAN Heterogeneous nuclear ribonucleoprotein R OS=Homo sapiens GN=HNRNPR PE=1 SV=1
P48681	NES	Nestin	1.09313	0.128471	22.627	186	-0.624992		24.699	642.5	54	41.5	177.44	1621	>sp|P48681|NEST_HUMAN Nestin OS=Homo sapiens GN=NES PE=1 SV=2
O14979	HNRNPDL	Heterogeneous nuclear ribonucleoprotein D-like	1.08699	0.120341	6.5303	4	-0.109493		26.1725	152	3	25.7	46.437	420	>sp|O14979|HNRDL_HUMAN Heterogeneous nuclear ribonucleoprotein D-like OS=Homo sapiens GN=HNRPDL PE=1 SV=3
O60506	SYNCRIP	Heterogeneous nuclear ribonucleoprotein Q	1.07572	0.105305	25.221	6	-0.100714		24.779	468.5	6	35.8	69.602	623	>sp|O60506|HNRPQ_HUMAN Heterogeneous nuclear ribonucleoprotein Q OS=Homo sapiens GN=SYNCRIP PE=1 SV=2
P12830	CDH1	Cadherin-1;E-Cad/CTF1;E-Cad/CTF2;E-Cad/CTF3	1.07029	0.0979965	28.538	9	0.130957		18.557	90	5	8.6	97.455	882	>sp|P12830|CADH1_HUMAN Cadherin-1 OS=Homo sapiens GN=CDH1 PE=1 SV=3
P22626	HNRNPA2B1	Heterogeneous nuclear ribonucleoproteins A2/B1	1.05072	0.071372	13.576	18	-0.100181		27.5715	452	9	47.9	37.429	353	>sp|P22626|ROA2_HUMAN Heterogeneous nuclear ribonucleoproteins A2/B1 OS=Homo sapiens GN=HNRNPA2B1 PE=1 SV=2
Q562R1	ACTBL2	Beta-actin-like protein 2	1.02561	0.0364855	20.922	4	ND		ND	ND	1	19.7	42.003	376	>sp|Q562R1|ACTBL_HUMAN Beta-actin-like protein 2 OS=Homo sapiens GN=ACTBL2 PE=1 SV=2
Q9P2E9	RRBP1	Ribosome-binding protein 1	0.99714	-0.00413167	26	10	0.0492018		20.9135	763.5	12	42.1	152.47	1410	>sp|Q9P2E9|RRBP1_HUMAN Ribosome-binding protein 1 OS=Homo sapiens GN=RRBP1 PE=1 SV=4
Q14103	HNRNPD	Heterogeneous nuclear ribonucleoprotein D0	0.992641	-0.0106564	12.214	10	-0.0328038		18.145	196	2	21.7	38.434	355	>sp|Q14103|HNRPD_HUMAN Heterogeneous nuclear ribonucleoprotein D0 OS=Homo sapiens GN=HNRNPD PE=1 SV=1
Q9UKM9	RALY	RNA-binding protein Raly	0.992429	-0.0109637	8.6409	7	0.01477		20.448	89.5	3	16.7	32.463	306	>sp|Q9UKM9|RALY_HUMAN RNA-binding protein Raly OS=Homo sapiens GN=RALY PE=1 SV=1
Q07955	SRSF1	Serine/arginine-rich splicing factor 1	0.986812	-0.0191529	13.93	21	0.00926208		17.7745	232.5	9	48.4	27.744	248	>sp|Q07955|SRSF1_HUMAN Serine/arginine-rich splicing factor 1 OS=Homo sapiens GN=SRSF1 PE=1 SV=2
P07237	P4HB	Protein disulfide-isomerase	0.982349	-0.0256931	37.036	27	-0.122507		30.218	655.5	9	63.8	57.116	508	>sp|P07237|PDIA1_HUMAN Protein disulfide-isomerase OS=Homo sapiens GN=P4HB PE=1 SV=3
P63208	SKP1	S-phase kinase-associated protein 1	0.960696	-0.0578485	20.471	5	0.360006		18.0325	123.5	4	57.1	18.658	163	>sp|P63208|SKP1_HUMAN S-phase kinase-associated protein 1 OS=Homo sapiens GN=SKP1 PE=1 SV=2
P68133	ACTA1;ACTC1;ACTG2;ACTA2	Actin, alpha skeletal muscle;Actin, alpha cardiac muscle 1;Actin, gamma-enteric smooth muscle;Actin, aortic smooth muscle	0.94509	-0.0814767	12.629	10	ND		ND	ND	1	31.8	42.051	377	>sp|P68133|ACTS_HUMAN Actin, alpha skeletal muscle OS=Homo sapiens GN=ACTA1 PE=1 SV=1;>sp|P68032|ACTC_HUMAN Actin, alpha cardiac muscle 1 OS=Homo sapiens GN=ACTC1 PE=1 SV=1;>sp|P63267|ACTH_HUMAN Actin, gamma-enteric smooth muscle OS=Homo sapiens GN=ACTG2 P
P51991	HNRNPA3	Heterogeneous nuclear ribonucleoprotein A3	0.926587	-0.110002	29.599	10	-0.148133		40.832	267.5	4	40.2	39.594	378	>sp|P51991|ROA3_HUMAN Heterogeneous nuclear ribonucleoprotein A3 OS=Homo sapiens GN=HNRNPA3 PE=1 SV=2
Q13247	SRSF6;SRSF4	Serine/arginine-rich splicing factor 6;Serine/arginine-rich splicing factor 4	0.910295	-0.135593	17.297	9	-0.0789183		18.0355	131	3	16	39.586	344	>sp|Q13247|SRSF6_HUMAN Serine/arginine-rich splicing factor 6 OS=Homo sapiens GN=SRSF6 PE=1 SV=2;>sp|Q08170|SRSF4_HUMAN Serine/arginine-rich splicing factor 4 OS=Homo sapiens GN=SRSF4 PE=1 SV=2
P63261	ACTG1	Actin, cytoplasmic 2;Actin, cytoplasmic 2, N-terminally processed	0.908859	-0.137872	35.847	136	0.102279		29.6695	1575	21	77.6	41.792	375	>sp|P63261|ACTG_HUMAN Actin, cytoplasmic 2 OS=Homo sapiens GN=ACTG1 PE=1 SV=1
Q969F1	GTF3C6	General transcription factor 3C polypeptide 6	0.897559	-0.155921	30.144	6	ND		ND	ND	2	7.5	24.048	213	>sp|Q969F1|TF3C6_HUMAN General transcription factor 3C polypeptide 6 OS=Homo sapiens GN=GTF3C6 PE=1 SV=1
Q86V81	ALYREF	THO complex subunit 4	0.893413	-0.162601	27.098	7	-0.011397		28.6575	144.5	2	16.3	26.888	257	>sp|Q86V81|THOC4_HUMAN THO complex subunit 4 OS=Homo sapiens GN=ALYREF PE=1 SV=3
P98179	RBM3	Putative RNA-binding protein 3	0.868613	-0.203214	19.727	3	0.236186		16.7315	87.5	2	23.6	17.17	157	>sp|P98179|RBM3_HUMAN Putative RNA-binding protein 3 OS=Homo sapiens GN=RBM3 PE=1 SV=1
Q01130	SRSF2;SRSF8	Serine/arginine-rich splicing factor 2;Serine/arginine-rich splicing factor 8	0.84802	-0.237831	28.977	8	0.0280136		10.997	68	3	21.7	25.476	221	>sp|Q01130|SRSF2_HUMAN Serine/arginine-rich splicing factor 2 OS=Homo sapiens GN=SRSF2 PE=1 SV=4;>sp|Q9BRL6|SRSF8_HUMAN Serine/arginine-rich splicing factor 8 OS=Homo sapiens GN=SRSF8 PE=1 SV=1
Q13813	SPTAN1	Spectrin alpha chain, non-erythrocytic 1	0.842486	-0.247276	21.248	7	-0.256587		18.428	2394	7	59.4	284.54	2472	>sp|Q13813|SPTN1_HUMAN Spectrin alpha chain, non-erythrocytic 1 OS=Homo sapiens GN=SPTAN1 PE=1 SV=3
Q15424	SAFB	Scaffold attachment factor B1	0.828621	-0.271216	40.117	13	-0.139306		23.716	81	6	13.4	102.64	915	>sp|Q15424|SAFB1_HUMAN Scaffold attachment factor B1 OS=Homo sapiens GN=SAFB PE=1 SV=4
P60709	ACTB	Actin, cytoplasmic 1;Actin, cytoplasmic 1, N-terminally processed	0.82045	-0.285512	17.522	17	ND		ND	ND	1	77.3	41.736	375	>sp|P60709|ACTB_HUMAN Actin, cytoplasmic 1 OS=Homo sapiens GN=ACTB PE=1 SV=1
Q9UKV3	ACIN1	Apoptotic chromatin condensation inducer in the nucleus	0.815555	-0.294146	15.965	3	-0.0351763		36.4185	219	2	9.1	151.86	1341	>sp|Q9UKV3|ACINU_HUMAN Apoptotic chromatin condensation inducer in the nucleus OS=Homo sapiens GN=ACIN1 PE=1 SV=2
Q13501	SQSTM1	Sequestosome-1	0.800387	-0.32123	40.127	4	-0.030912		18.159	161	2	41.8	47.687	440	>sp|Q13501|SQSTM_HUMAN Sequestosome-1 OS=Homo sapiens GN=SQSTM1 PE=1 SV=1
Q1KMD3	HNRNPUL2	Heterogeneous nuclear ribonucleoprotein U-like protein 2	0.739006	-0.436341	11.07	5	-0.249039		24.906	221.5	2	9.9	85.104	747	>sp|Q1KMD3|HNRL2_HUMAN Heterogeneous nuclear ribonucleoprotein U-like protein 2 OS=Homo sapiens GN=HNRNPUL2 PE=1 SV=1
P19105	MYL12A;MYL12B;MYL9	Myosin regulatory light chain 12A;Myosin regulatory light chain 12B;Myosin regulatory light polypeptide 9	0.732878	-0.448356	25.731	13	0.280229		20.704	151	6	52	19.794	171	>sp|P19105|ML12A_HUMAN Myosin regulatory light chain 12A OS=Homo sapiens GN=MYL12A PE=1 SV=2;>sp|O14950|ML12B_HUMAN Myosin regulatory light chain 12B OS=Homo sapiens GN=MYL12B PE=1 SV=2;>sp|P24844|MYL9_HUMAN Myosin regulatory light polypeptide 9 OS=Homo sa
P19338	NCL	Nucleolin	0.697361	-0.520023	28.534	37	-0.0311539		23.4735	552.5	12	32.1	76.613	710	>sp|P19338|NUCL_HUMAN Nucleolin OS=Homo sapiens GN=NCL PE=1 SV=3
P67809	YBX1	Nuclease-sensitive element-binding protein 1	0.658792	-0.602105	26.292	16	0.0709487		20.1555	31	6	49.7	35.924	324	>sp|P67809|YBOX1_HUMAN Nuclease-sensitive element-binding protein 1 OS=Homo sapiens GN=YBX1 PE=1 SV=3
P60660	MYL6	Myosin light polypeptide 6	0.553383	-0.85365	25.818	30	0.387811		30.5425	132	7	55.6	16.93	151	>sp|P60660|MYL6_HUMAN Myosin light polypeptide 6 OS=Homo sapiens GN=MYL6 PE=1 SV=2
Q14257	RCN2	Reticulocalbin-2	0.477822	-1.06545	20.384	21	0.18537		14.703	132	8	31.2	36.876	317	>sp|Q14257|RCN2_HUMAN Reticulocalbin-2 OS=Homo sapiens GN=RCN2 PE=1 SV=1
P06753	TPM3	Tropomyosin alpha-3 chain	0.373831	-1.41954	35.144	16	0.286333		17.9265	153	7	37.5	32.95	285	>sp|P06753|TPM3_HUMAN Tropomyosin alpha-3 chain OS=Homo sapiens GN=TPM3 PE=1 SV=2
P67936	TPM4	Tropomyosin alpha-4 chain	0.333416	-1.58461	32.464	29	0.285932		24.4315	210	16	63.3	28.521	248	>sp|P67936|TPM4_HUMAN Tropomyosin alpha-4 chain OS=Homo sapiens GN=TPM4 PE=1 SV=3
A6NL28		Putative tropomyosin alpha-3 chain-like protein	0.308511	-1.69661	21.61	9	0.297397		17.494	35	3	14.8	26.269	223	>sp|A6NL28|TPM3L_HUMAN Putative tropomyosin alpha-3 chain-like protein OS=Homo sapiens PE=5 SV=2

## Sheet: (B) DENV_WholeCell_SILAC
Primary Group Accession	Primary Group Gene	Protein Name	Log2 DENV/MOCK Ratio, Rep1	Log2 DENV/MOCK Ratio, Rep2	Log2 DENV/MOCK Ratio, Avg	Differential Expression (±1.75-fold)	Ratio variability [%], Rep1	Ratio variability [%], Rep2	Ratio count, Rep1	Ratio count, Rep2	Razor + unique peptides, Rep1	Razor + unique peptides, Rep2	Unique peptides, Rep1	Unique peptides, Rep2	Intensity DENV Rep1	Intensity MOCK Rep1	Intensity DENV Rep2	Intensity MOCK Rep2	Sequence coverage [%]	Fasta headers
Q96D05	C10orf35	Uncharacterized protein C10orf35	-2.69577	-2.1514	-2.39806	D	15.853	7.763	4	4	2	2	2	2	4675900	23839000	6904400	32352000	22.3	>sp|Q96D05|CJ035_HUMAN Uncharacterized protein C10orf35 OS=Homo sapiens GN=C10orf35 PE=1 SV=1
Q9BU23	LMF2	Lipase maturation factor 2	-1.41278	-1.08263	-1.23829	D	39.221	18.329	32	44	5	6	5	6	20761000	55098000	120320000	279700000	15.6	>sp|Q9BU23|LMF2_HUMAN Lipase maturation factor 2 OS=Homo sapiens GN=LMF2 PE=1 SV=2
P04083	ANXA1	Annexin A1	-1.5742	-0.688583	-1.06448	D	32.679	27.901	74	69	19	17	19	17	106300000	278170000	229170000	384120000	69.7	>sp|P04083|ANXA1_HUMAN Annexin A1 OS=Homo sapiens GN=ANXA1 PE=1 SV=2
Q9NZM1	MYOF	Myoferlin	-1.12525	-0.97739	-1.04943	D	20.541	19.084	5	3	2	2	2	2	1926000	4258400	374390	1036400	3.5	>sp|Q9NZM1|MYOF_HUMAN Myoferlin OS=Homo sapiens GN=MYOF PE=1 SV=1
Q9NPR9	GPR108	Protein GPR108	-3.59192	-0.169284	-1.04065	D	300.97	52.976	2	9	2	4	2	4	1116000	78529000	92864000	65133000	7.7	>sp|Q9NPR9|GP108_HUMAN Protein GPR108 OS=Homo sapiens GN=GPR108 PE=2 SV=3
P03905	MT-ND4	NADH-ubiquinone oxidoreductase chain 4	-1.55611	-0.607768	-1.00538	D	18.161	23.848	7	11	4	4	4	4	2778700	7110800	54101000	158510000	9.8	>sp|P03905|NU4M_HUMAN NADH-ubiquinone oxidoreductase chain 4 OS=Homo sapiens GN=MT-ND4 PE=1 SV=1
Q8TAD4	SLC30A5	Zinc transporter 5	-1.46968	-0.598937	-0.969589	D	16.895	29.138	3	5	2	3	2	3	1119400	2587800	7737400	11277000	6.9	>sp|Q8TAD4|ZNT5_HUMAN Zinc transporter 5 OS=Homo sapiens GN=SLC30A5 PE=1 SV=1
Q92536	SLC7A6	Y+L amino acid transporter 2	-0.840363	-1.10688	-0.967477	D	64.884	14.158	7	5	2	2	2	2	3134600	6082100	7397300	13234000	4.5	>sp|Q92536|YLAT2_HUMAN Y+L amino acid transporter 2 OS=Homo sapiens GN=SLC7A6 PE=1 SV=3
Q8IWV8	UBR2	E3 ubiquitin-protein ligase UBR2	-1.848	-0.420186	-0.964227	D	95.308	43.907	4	6	3	3	3	3	460550	994600	2837700	4119500	4	>sp|Q8IWV8|UBR2_HUMAN E3 ubiquitin-protein ligase UBR2 OS=Homo sapiens GN=UBR2 PE=1 SV=1
P08571	CD14	Monocyte differentiation antigen CD14	-0.738033	-1.22114	-0.959456	D	20.714	30.898	3	3	2	2	2	2	1176700	1603500	915900	1951400	15.2	>sp|P08571|CD14_HUMAN Monocyte differentiation antigen CD14 OS=Homo sapiens GN=CD14 PE=1 SV=2
P28288	ABCD3	ATP-binding cassette sub-family D member 3	-1.42153	-0.551393	-0.921832	D	25.362	18.018	136	175	23	23	23	23	319170000	769040000	1624700000	2625700000	41	>sp|P28288|ABCD3_HUMAN ATP-binding cassette sub-family D member 3 OS=Homo sapiens GN=ABCD3 PE=1 SV=1
Q9Y672	ALG6	Dolichyl pyrophosphate Man9GlcNAc2 alpha-1,3-glucosyltransferase	-1.22182	-0.660655	-0.914121	D	14.916	51.361	11	8	3	3	3	3	6699500	13891000	30496000	47931000	6.5	>sp|Q9Y672|ALG6_HUMAN Dolichyl pyrophosphate Man9GlcNAc2 alpha-1,3-glucosyltransferase OS=Homo sapiens GN=ALG6 PE=1 SV=1
Q14643	ITPR1	Inositol 1,4,5-trisphosphate receptor type 1	-1.51728	-0.487281	-0.912247	D	22.34	14.632	6	13	6	7	6	7	3417900	7422900	10392000	15070000	8.4	>sp|Q14643|ITPR1_HUMAN Inositol 1,4,5-trisphosphate receptor type 1 OS=Homo sapiens GN=ITPR1 PE=1 SV=3
P12235	SLC25A4	ADP/ATP translocase 1	-1.40991	-0.492315	-0.879357	D	16.204	12.303	19	14	5	5	5	5	20181000	55915000	76180000	131970000	55.4	>sp|P12235|ADT1_HUMAN ADP/ATP translocase 1 OS=Homo sapiens GN=SLC25A4 PE=1 SV=4
Q9NRK6	ABCB10	ATP-binding cassette sub-family B member 10, mitochondrial	-1.33691	-0.523562	-0.873662	D	9.821	82.148	3	23	2	12	2	12	328560	706890	57044000	276740000	20.3	>sp|Q9NRK6|ABCBA_HUMAN ATP-binding cassette sub-family B member 10, mitochondrial OS=Homo sapiens GN=ABCB10 PE=1 SV=2
O96011	PEX11B	Peroxisomal membrane protein 11B	-0.906737	-0.834711	-0.870275	D	15.145	76.064	3	6	2	5	2	5	1627800	2502400	37379000	41423000	24.3	>sp|O96011|PX11B_HUMAN Peroxisomal membrane protein 11B OS=Homo sapiens GN=PEX11B PE=1 SV=1
Q6Y1H2	PTPLB	Very-long-chain (3R)-3-hydroxyacyl-[acyl-carrier protein] dehydratase 2	-1.10943	-0.647729	-0.860187	D	12.631	12.162	12	10	5	3	5	3	31886000	56831000	78934000	138250000	15	>sp|Q6Y1H2|HACD2_HUMAN Very-long-chain (3R)-3-hydroxyacyl-[acyl-carrier protein] dehydratase 2 OS=Homo sapiens GN=PTPLB PE=1 SV=1
Q9NUT2	ABCB8	ATP-binding cassette sub-family B member 8, mitochondrial	-1.38521	-0.470094	-0.856279	D	67.393	18.762	6	9	2	4	2	4	1911700	4203600	14423000	7957000	10.5	>sp|Q9NUT2|ABCB8_HUMAN ATP-binding cassette sub-family B member 8, mitochondrial OS=Homo sapiens GN=ABCB8 PE=1 SV=3
Q6P1A2	LPCAT3	Lysophospholipid acyltransferase 5	-1.04068	-0.665393	-0.840869	D	30.866	13.709	41	30	8	6	8	6	49384000	87211000	236750000	391950000	24.2	>sp|Q6P1A2|MBOA5_HUMAN Lysophospholipid acyltransferase 5 OS=Homo sapiens GN=LPCAT3 PE=1 SV=1
O60287	URB1	Nucleolar pre-ribosomal-associated protein 1	-1.13291	-0.597889	-0.840737	D	35.828	25.701	55	51	19	17	19	17	41060000	56280000	87165000	120240000	16.6	>sp|O60287|NPA1P_HUMAN Nucleolar pre-ribosomal-associated protein 1 OS=Homo sapiens GN=URB1 PE=1 SV=4
P03915	MT-ND5	NADH-ubiquinone oxidoreductase chain 5	-1.33382	-0.46634	-0.83584	D	19.993	16.525	4	7	2	2	2	2	3219000	6884700	12595000	14972000	6	>sp|P03915|NU5M_HUMAN NADH-ubiquinone oxidoreductase chain 5 OS=Homo sapiens GN=MT-ND5 PE=1 SV=2
Q9NRA2	SLC17A5	Sialin	-1.40708	-0.42503	-0.834059	D	28.326	17.428	5	6	3	2	3	2	6693600	18254000	7365300	11178000	10.7	>sp|Q9NRA2|S17A5_HUMAN Sialin OS=Homo sapiens GN=SLC17A5 PE=1 SV=2
Q8IUD2	ERC1	ELKS/Rab6-interacting/CAST family member 1	-0.886355	-0.77804	-0.831182	D	46.935	29.235	31	13	12	12	10	11	19893000	29163000	20536000	37041000	19.2	>sp|Q8IUD2|RB6I2_HUMAN ELKS/Rab6-interacting/CAST family member 1 OS=Homo sapiens GN=ERC1 PE=1 SV=1
Q2PZI1	DPY19L1	Probable C-mannosyltransferase DPY19L1	-0.901572	-0.762221	-0.830215	D	17.747	13.777	7	4	4	2	4	2	2143500	3412900	9198300	25235000	8.3	>sp|Q2PZI1|D19L1_HUMAN Probable C-mannosyltransferase DPY19L1 OS=Homo sapiens GN=DPY19L1 PE=2 SV=1
Q96AA3	RFT1	Protein RFT1 homolog	-1.13021	-0.566766	-0.821153	D	11.661	13.102	5	5	2	2	2	2	717150	1407200	2587800	4113700	4.8	>sp|Q96AA3|RFT1_HUMAN Protein RFT1 homolog OS=Homo sapiens GN=RFT1 PE=1 SV=1
P08670	VIM	Vimentin	-0.879157	-0.759838	-0.818264	D	26.587	33.123	910	961	48	42	44	38	24510000000	36827000000	51774000000	95816000000	86.1	>sp|P08670|VIME_HUMAN Vimentin OS=Homo sapiens GN=VIM PE=1 SV=4
Q9UBX3	SLC25A10	Mitochondrial dicarboxylate carrier	-1.28617	-0.459222	-0.81424	D	14.926	14.887	64	42	9	9	9	9	68219000	148640000	207480000	306010000	53	>sp|Q9UBX3|DIC_HUMAN Mitochondrial dicarboxylate carrier OS=Homo sapiens GN=SLC25A10 PE=1 SV=2
O43826	SLC37A4	Glucose-6-phosphate translocase	-1.13199	-0.551196	-0.812559	D	21.715	26.023	4	16	2	3	2	3	412560	700480	30300000	44587000	7.9	>sp|O43826|G6PT1_HUMAN Glucose-6-phosphate translocase OS=Homo sapiens GN=SLC37A4 PE=1 SV=1
Q96QD8	SLC38A2	Sodium-coupled neutral amino acid transporter 2	-0.824075	-0.772646	-0.798131		41.308	55.546	18	19	3	5	3	5	14033000	10422000	55985000	49775000	17.6	>sp|Q96QD8|S38A2_HUMAN Sodium-coupled neutral amino acid transporter 2 OS=Homo sapiens GN=SLC38A2 PE=1 SV=2
Q6PIU2	NCEH1	Neutral cholesterol ester hydrolase 1	-1.05436	-0.580338	-0.797969		39.497	13.02	29	24	8	5	8	5	67529000	80869000	66209000	99572000	27.7	>sp|Q6PIU2|NCEH1_HUMAN Neutral cholesterol ester hydrolase 1 OS=Homo sapiens GN=NCEH1 PE=1 SV=3
P00156	MT-CYB	Cytochrome b	-1.37846	-0.379399	-0.794122		48.281	9.8302	7	8	2	2	2	2	10642000	12876000	40647000	60979000	8.2	>sp|P00156|CYB_HUMAN Cytochrome b OS=Homo sapiens GN=MT-CYB PE=1 SV=2
Q9Y276	BCS1L	Mitochondrial chaperone BCS1	-1.2509	-0.439676	-0.789006		25.182	20.615	17	12	6	6	6	6	3471100	7519800	26352000	36166000	34.6	>sp|Q9Y276|BCS1_HUMAN Mitochondrial chaperone BCS1 OS=Homo sapiens GN=BCS1L PE=1 SV=1
Q8WUD6	CHPT1	Cholinephosphotransferase 1	-1.03274	-0.57657	-0.786698		45.874	22.914	3	8	2	2	2	2	4630700	10680000	14414000	20217000	6.9	>sp|Q8WUD6|CHPT1_HUMAN Cholinephosphotransferase 1 OS=Homo sapiens GN=CHPT1 PE=2 SV=1
Q9HC21	SLC25A19	Mitochondrial thiamine pyrophosphate carrier	-1.35654	-0.366252	-0.778045		37.459	13.881	4	8	3	5	3	5	2312600	5859000	12643000	15621000	21.6	>sp|Q9HC21|TPC_HUMAN Mitochondrial thiamine pyrophosphate carrier OS=Homo sapiens GN=SLC25A19 PE=1 SV=1
Q8WVM0	TFB1M	Dimethyladenosine transferase 1, mitochondrial	-1.05859	-0.539134	-0.775609		30.317	6.7839	4	2	4	2	4	2	2162000	3413300	1327300	1976300	11.8	>sp|Q8WVM0|TFB1M_HUMAN Dimethyladenosine transferase 1, mitochondrial OS=Homo sapiens GN=TFB1M PE=1 SV=1
Q9Y6C9	MTCH2	Mitochondrial carrier homolog 2	-1.21164	-0.438612	-0.773956		38.699	30.864	96	73	12	8	12	8	270460000	626350000	733400000	1135600000	56.8	>sp|Q9Y6C9|MTCH2_HUMAN Mitochondrial carrier homolog 2 OS=Homo sapiens GN=MTCH2 PE=1 SV=1
O75027	ABCB7	ATP-binding cassette sub-family B member 7, mitochondrial	-1.2262	-0.406646	-0.758993		43.346	13.917	19	13	8	6	8	6	27600000	15060000	117070000	69059000	18.5	>sp|O75027|ABCB7_HUMAN ATP-binding cassette sub-family B member 7, mitochondrial OS=Homo sapiens GN=ABCB7 PE=1 SV=2
O15254	ACOX3	Peroxisomal acyl-coenzyme A oxidase 3	-1.12281	-0.445621	-0.74484		37.915	30.15	16	27	9	11	9	11	13493000	20102000	80433000	103730000	37.6	>sp|O15254|ACOX3_HUMAN Peroxisomal acyl-coenzyme A oxidase 3 OS=Homo sapiens GN=ACOX3 PE=1 SV=2
P12236	SLC25A6	ADP/ATP translocase 3	-1.2762	-0.355016	-0.7433		24.07	12.508	71	49	7	4	2	1	116180000	248300000	529170000	766630000	56.7	>sp|P12236|ADT3_HUMAN ADP/ATP translocase 3 OS=Homo sapiens GN=SLC25A6 PE=1 SV=4
O00400	SLC33A1	Acetyl-coenzyme A transporter 1	-1.13021	-0.41997	-0.731817		10.911	53.273	12	17	3	6	3	6	14907000	25426000	76870000	85733000	14.6	>sp|O00400|ACATN_HUMAN Acetyl-coenzyme A transporter 1 OS=Homo sapiens GN=SLC33A1 PE=1 SV=1
P50416	CPT1A	Carnitine O-palmitoyltransferase 1, liver isoform	-1.21531	-0.367818	-0.730206		26.841	20.427	32	55	13	14	13	14	31523000	64114000	227610000	329740000	28.5	>sp|P50416|CPT1A_HUMAN Carnitine O-palmitoyltransferase 1, liver isoform OS=Homo sapiens GN=CPT1A PE=1 SV=2
Q9BQE5	APOL2	Apolipoprotein L2	-0.96066	-0.528371	-0.728384		50.9	18.623	16	6	5	6	5	6	16941000	14569000	37139000	62383000	27.3	>sp|Q9BQE5|APOL2_HUMAN Apolipoprotein L2 OS=Homo sapiens GN=APOL2 PE=1 SV=1
O43657	TSPAN6	Tetraspanin-6	-0.736302	-0.709202	-0.722688		19.935	30.089	37	38	5	7	5	7	133180000	181290000	295290000	519640000	24.1	>sp|O43657|TSN6_HUMAN Tetraspanin-6 OS=Homo sapiens GN=TSPAN6 PE=1 SV=1
Q9H300	PARL	Presenilins-associated rhomboid-like protein, mitochondrial	-1.36715	-0.278342	-0.722378		20.244	21.44	5	11	4	3	4	3	2606600	5527500	18502000	24297000	14	>sp|Q9H300|PARL_HUMAN Presenilins-associated rhomboid-like protein, mitochondrial OS=Homo sapiens GN=PARL PE=1 SV=2
P51795	CLCN5	H(+)/Cl(-) exchange transporter 5	-0.952855	-0.513086	-0.716279		24.177	10.989	17	9	4	3	3	3	4544300	8592000	6044700	9179400	11.1	>sp|P51795|CLCN5_HUMAN H(+)/Cl(-) exchange transporter 5 OS=Homo sapiens GN=CLCN5 PE=1 SV=1
P42704	LRPPRC	Leucine-rich PPR motif-containing protein, mitochondrial	-1.20564	-0.350384	-0.715543		28.49	20.499	831	797	93	87	92	86	2303600000	4661600000	11125000000	15616000000	72.5	>sp|P42704|LPPRC_HUMAN Leucine-rich PPR motif-containing protein, mitochondrial OS=Homo sapiens GN=LRPPRC PE=1 SV=3
O43292	GPAA1	Glycosylphosphatidylinositol anchor attachment 1 protein	-1.0554	-0.438612	-0.714294		22.303	23.542	11	18	4	6	4	6	19330000	31152000	61259000	86229000	11.9	>sp|O43292|GPAA1_HUMAN Glycosylphosphatidylinositol anchor attachment 1 protein OS=Homo sapiens GN=GPAA1 PE=1 SV=3
Q96KA5	CLPTM1L	Cleft lip and palate transmembrane protein 1-like protein	-0.959844	-0.504468	-0.714263		23.581	9.8313	13	15	5	6	5	6	17544000	30222000	57448000	85742000	25.1	>sp|Q96KA5|CLP1L_HUMAN Cleft lip and palate transmembrane protein 1-like protein OS=Homo sapiens GN=CLPTM1L PE=1 SV=1
P39210	MPV17	Protein Mpv17	-0.761626	-0.663299	-0.711625		28.848	12.652	16	4	2	2	2	2	6140700	10077000	3164900	4828200	17.6	>sp|P39210|MPV17_HUMAN Protein Mpv17 OS=Homo sapiens GN=MPV17 PE=1 SV=1
P83111	LACTB	Serine beta-lactamase-like protein LACTB, mitochondrial	-0.983313	-0.471031	-0.704553		55.253	26.802	58	53	18	14	18	14	69470000	100640000	260190000	360030000	30.9	>sp|P83111|LACTB_HUMAN Serine beta-lactamase-like protein LACTB, mitochondrial OS=Homo sapiens GN=LACTB PE=1 SV=2
P46199	MTIF2	Translation initiation factor IF-2, mitochondrial	-1.0999	-0.392757	-0.70343		39.203	32.484	11	13	6	8	6	8	10467000	19447000	37763000	52612000	18.4	>sp|P46199|IF2M_HUMAN Translation initiation factor IF-2, mitochondrial OS=Homo sapiens GN=MTIF2 PE=1 SV=2
Q9H583	HEATR1	HEAT repeat-containing protein 1	-1.04977	-0.416948	-0.698936		28.229	23.605	146	139	47	43	47	43	85934000	156090000	435320000	546020000	33.8	>sp|Q9H583|HEAT1_HUMAN HEAT repeat-containing protein 1 OS=Homo sapiens GN=HEATR1 PE=1 SV=3
P42892	ECE1	Endothelin-converting enzyme 1	-0.778629	-0.61438	-0.694168		16.677	12.474	54	47	14	13	14	13	58099000	85815000	104150000	173120000	32.2	>sp|P42892|ECE1_HUMAN Endothelin-converting enzyme 1 OS=Homo sapiens GN=ECE1 PE=1 SV=2
P23378	GLDC	Glycine dehydrogenase [decarboxylating], mitochondrial	-0.818932	-0.577344	-0.693087		32.648	20.302	225	198	31	31	31	31	415670000	627480000	1241300000	2026700000	50.1	>sp|P23378|GCSP_HUMAN Glycine dehydrogenase [decarboxylating], mitochondrial OS=Homo sapiens GN=GLDC PE=1 SV=2
Q96I59	NARS2	Probable asparagine--tRNA ligase, mitochondrial	-1.04956	-0.406101	-0.692251		95.269	24.886	10	16	5	6	5	6	13920000	24463000	46907000	64706000	28.7	>sp|Q96I59|SYNM_HUMAN Probable asparagine--tRNA ligase, mitochondrial OS=Homo sapiens GN=NARS2 PE=1 SV=3
Q01650	SLC7A5	Large neutral amino acids transporter small subunit 1	-0.895535	-0.513187	-0.691732		48.189	17.004	17	27	3	3	3	3	116880000	180570000	494390000	866630000	9.5	>sp|Q01650|LAT1_HUMAN Large neutral amino acids transporter small subunit 1 OS=Homo sapiens GN=SLC7A5 PE=1 SV=2
Q9NWS8	RMND1	Required for meiotic nuclear division protein 1 homolog	-0.974676	-0.452806	-0.690272		34.093	16.575	18	25	7	10	7	10	12237000	19817000	74370000	111600000	25.8	>sp|Q9NWS8|RMND1_HUMAN Required for meiotic nuclear division protein 1 homolog OS=Homo sapiens GN=RMND1 PE=1 SV=2
Q8NE86	MCU	Calcium uniporter protein, mitochondrial	-0.929033	-0.485118	-0.690068		58.233	30.792	20	24	4	4	4	4	37959000	42538000	67141000	102510000	23.1	>sp|Q8NE86|MCU_HUMAN Calcium uniporter protein, mitochondrial OS=Homo sapiens GN=MCU PE=1 SV=1
P05141	SLC25A5	ADP/ATP translocase 2	-1.2254	-0.298306	-0.68863		28.046	15.636	184	180	17	16	7	7	2205200000	4257000000	8841300000	12114000000	46	>sp|P05141|ADT2_HUMAN ADP/ATP translocase 2 OS=Homo sapiens GN=SLC25A5 PE=1 SV=7
Q96QE5	TEFM	Transcription elongation factor, mitochondrial	-0.87342	-0.523462	-0.687855		19.55	9.8131	16	14	4	4	4	4	3950000	7238700	12319000	16740000	16.9	>sp|Q96QE5|TEFM_HUMAN Transcription elongation factor, mitochondrial OS=Homo sapiens GN=TEFM PE=1 SV=1
P33897	ABCD1	ATP-binding cassette sub-family D member 1	-1.1167	-0.353436	-0.685169		22.043	16.496	9	16	5	8	5	8	7373700	13811000	35414000	47507000	16.9	>sp|P33897|ABCD1_HUMAN ATP-binding cassette sub-family D member 1 OS=Homo sapiens GN=ABCD1 PE=1 SV=2
Q9UJS0	SLC25A13	Calcium-binding mitochondrial carrier protein Aralar2	-1.2122	-0.295723	-0.682377		33.83	14.533	174	233	31	28	23	22	365040000	719170000	2347300000	2971100000	54.7	>sp|Q9UJS0|CMC2_HUMAN Calcium-binding mitochondrial carrier protein Aralar2 OS=Homo sapiens GN=SLC25A13 PE=1 SV=2
Q6ZT21	TMPPE	Transmembrane protein with metallophosphoesterase domain	-0.841732	-0.531868	-0.678496		18.862	14.206	24	24	5	5	5	5	51854000	74493000	170680000	266510000	19.6	>sp|Q6ZT21|TMPPE_HUMAN Transmembrane protein with metallophosphoesterase domain OS=Homo sapiens GN=TMPPE PE=2 SV=2
O95810	SDPR	Serum deprivation-response protein	-0.587653	-0.769518	-0.675722		22.818	14.282	5	5	3	2	3	2	5006700	5308000	4920100	8285900	11.1	>sp|O95810|SDPR_HUMAN Serum deprivation-response protein OS=Homo sapiens GN=SDPR PE=1 SV=3
O75477	ERLIN1	Erlin-1	-0.898711	-0.479024	-0.67366		16.566	16.744	37	39	6	9	6	9	15603000	25088000	184980000	272380000	43.4	>sp|O75477|ERLN1_HUMAN Erlin-1 OS=Homo sapiens GN=ERLIN1 PE=1 SV=1
Q9Y619	SLC25A15	Mitochondrial ornithine transporter 1	-1.23958	-0.260146	-0.668296		31.573	10.082	21	18	8	7	8	7	12559000	26277000	46692000	66395000	42.9	>sp|Q9Y619|ORNT1_HUMAN Mitochondrial ornithine transporter 1 OS=Homo sapiens GN=SLC25A15 PE=1 SV=1
Q9NVV0	TMEM38B	Trimeric intracellular cation channel type B	-0.87342	-0.482539	-0.664781		54.912	22.343	21	27	5	6	5	6	18575000	30254000	115260000	169820000	28.5	>sp|Q9NVV0|TM38B_HUMAN Trimeric intracellular cation channel type B OS=Homo sapiens GN=TMEM38B PE=1 SV=1
Q9BQB6	VKORC1	Vitamin K epoxide reductase complex subunit 1	-0.80752	-0.529971	-0.662081		6.4061	44.213	9	6	2	2	2	2	27756000	42867000	20038000	31214000	12.9	>sp|Q9BQB6|VKOR1_HUMAN Vitamin K epoxide reductase complex subunit 1 OS=Homo sapiens GN=VKORC1 PE=1 SV=1
Q14146	URB2	Unhealthy ribosome biogenesis protein 2 homolog	-1.07574	-0.337882	-0.660144		18.61	12.961	28	16	11	5	11	5	9443900	17047000	22108000	33526000	12.4	>sp|Q14146|URB2_HUMAN Unhealthy ribosome biogenesis protein 2 homolog OS=Homo sapiens GN=URB2 PE=1 SV=2
P82675	MRPS5	28S ribosomal protein S5, mitochondrial	-0.945458	-0.415326	-0.656177		22.416	46.09	19	35	8	11	8	11	18261000	32166000	117020000	167290000	35.1	>sp|P82675|RT05_HUMAN 28S ribosomal protein S5, mitochondrial OS=Homo sapiens GN=MRPS5 PE=1 SV=2
Q6ZNB6	NFXL1	NF-X1-type zinc finger protein NFXL1	-0.816149	-0.510557	-0.655277		28.344	29.266	16	11	5	5	5	5	6650900	10316000	11301000	18071000	11.1	>sp|Q6ZNB6|NFXL1_HUMAN NF-X1-type zinc finger protein NFXL1 OS=Homo sapiens GN=NFXL1 PE=1 SV=2
Q9BPX6	MICU1	Calcium uptake protein 1, mitochondrial	-1.24811	-0.233397	-0.653322		19.325	25.205	3	12	2	4	2	4	810760	1506300	11402000	15619000	14.3	>sp|Q9BPX6|MICU1_HUMAN Calcium uptake protein 1, mitochondrial OS=Homo sapiens GN=MICU1 PE=1 SV=1
Q9NXB9	ELOVL2	Elongation of very long chain fatty acids protein 2	-0.839959	-0.479231	-0.64835		14.266	9.0844	20	19	2	2	2	2	2162700	3273400	9652500	13949000	9.8	>sp|Q9NXB9|ELOV2_HUMAN Elongation of very long chain fatty acids protein 2 OS=Homo sapiens GN=ELOVL2 PE=2 SV=2
Q08722	CD47	Leukocyte surface antigen CD47	-0.638769	-0.657274	-0.647992		10.427	9.2832	4	14	2	2	2	2	8334300	11575000	46266000	77425000	5.3	>sp|Q08722|CD47_HUMAN Leukocyte surface antigen CD47 OS=Homo sapiens GN=CD47 PE=1 SV=1
P27338	MAOB	Amine oxidase [flavin-containing] B	-0.943659	-0.401958	-0.647532		40.316	36.37	116	159	22	17	21	16	307420000	492670000	1610400000	2362200000	53.1	>sp|P27338|AOFB_HUMAN Amine oxidase [flavin-containing] B OS=Homo sapiens GN=MAOB PE=1 SV=3
Q8WTT2	NOC3L	Nucleolar complex protein 3 homolog	-0.799419	-0.501516	-0.642792		43.914	22.594	37	54	14	15	14	15	41001000	66915000	159120000	232280000	29	>sp|Q8WTT2|NOC3L_HUMAN Nucleolar complex protein 3 homolog OS=Homo sapiens GN=NOC3L PE=1 SV=1
Q9BUB7	TMEM70	Transmembrane protein 70, mitochondrial	-0.852239	-0.457437	-0.641374		17.403	13.551	13	15	4	2	4	2	6245300	11719000	46387000	72145000	20.4	>sp|Q9BUB7|TMM70_HUMAN Transmembrane protein 70, mitochondrial OS=Homo sapiens GN=TMEM70 PE=1 SV=2
Q99623	PHB2	Prohibitin-2	-1.01963	-0.340505	-0.640471		29.878	15.599	171	160	14	15	14	15	836600000	1471400000	5006500000	7174100000	58.5	>sp|Q99623|PHB2_HUMAN Prohibitin-2 OS=Homo sapiens GN=PHB2 PE=1 SV=2
Q9UQ90	SPG7	Paraplegin	-0.816149	-0.48388	-0.64047		18.296	22.625	20	12	8	6	8	6	11570000	17915000	12534000	19640000	24.9	>sp|Q9UQ90|SPG7_HUMAN Paraplegin OS=Homo sapiens GN=SPG7 PE=1 SV=2
O75955	FLOT1	Flotillin-1	-0.689389	-0.591105	-0.63941		23.397	25.529	56	49	14	12	14	12	73658000	102310000	190300000	334810000	50.1	>sp|O75955|FLOT1_HUMAN Flotillin-1 OS=Homo sapiens GN=FLOT1 PE=1 SV=3
Q14690	PDCD11	Protein RRP5 homolog	-0.877823	-0.4336	-0.638681		31.201	18.576	102	99	35	33	35	33	74449000	118300000	306860000	382880000	34	>sp|Q14690|RRP5_HUMAN Protein RRP5 homolog OS=Homo sapiens GN=PDCD11 PE=1 SV=3
P24539	ATP5F1	ATP synthase subunit b, mitochondrial	-0.974089	-0.363339	-0.636633		23.71	13.981	121	134	14	14	14	14	460320000	803360000	2776800000	4042000000	51.6	>sp|P24539|AT5F1_HUMAN ATP synthase subunit b, mitochondrial OS=Homo sapiens GN=ATP5F1 PE=1 SV=2
Q8IWA0	WDR75	WD repeat-containing protein 75	-0.934101	-0.389897	-0.63649		31.2	17.718	43	42	12	12	12	12	37350000	59097000	88075000	120170000	29.3	>sp|Q8IWA0|WDR75_HUMAN WD repeat-containing protein 75 OS=Homo sapiens GN=WDR75 PE=1 SV=1
Q8NDZ4	C3orf58	Deleted in autism protein 1	-0.927214	-0.392757	-0.635376		26.951	26.558	26	27	10	8	10	8	37270000	51952000	111860000	154820000	31.6	>sp|Q8NDZ4|DIA1_HUMAN Deleted in autism protein 1 OS=Homo sapiens GN=C3orf58 PE=2 SV=1
A2RRP1	NBAS	Neuroblastoma-amplified sequence	-0.88276	-0.422879	-0.634572		39.933	24.099	43	48	20	22	20	22	13659000	22977000	66927000	93271000	20.5	>sp|A2RRP1|NBAS_HUMAN Neuroblastoma-amplified sequence OS=Homo sapiens GN=NBAS PE=1 SV=2
Q9NRR3	CDC42SE2	CDC42 small effector protein 2	-0.61664	-0.6515	-0.633964		25.657	8.951	8	7	2	2	2	2	29983000	31457000	22208000	39016000	66.7	>sp|Q9NRR3|C42S2_HUMAN CDC42 small effector protein 2 OS=Homo sapiens GN=CDC42SE2 PE=1 SV=1
P03886	MT-ND1	NADH-ubiquinone oxidoreductase chain 1	-1.25598	-0.198494	-0.632441		40.045	19.354	18	14	3	2	3	2	15261000	25027000	52737000	68310000	9.4	>sp|P03886|NU1M_HUMAN NADH-ubiquinone oxidoreductase chain 1 OS=Homo sapiens GN=MT-ND1 PE=1 SV=1
Q9NYY8	FASTKD2	FAST kinase domain-containing protein 2	-1.10976	-0.271904	-0.630845		21.319	19.597	13	27	6	10	6	10	4475200	9424400	80966000	98666000	21.1	>sp|Q9NYY8|FAKD2_HUMAN FAST kinase domain-containing protein 2 OS=Homo sapiens GN=FASTKD2 PE=1 SV=1
Q96P47	AGAP3	Arf-GAP with GTPase, ANK repeat and PH domain-containing protein 3	-0.642748	-0.618896	-0.630773		33.577	43.173	5	5	2	2	2	2	5755900	7365000	16550000	37358000	5.7	>sp|Q96P47|AGAP3_HUMAN Arf-GAP with GTPase, ANK repeat and PH domain-containing protein 3 OS=Homo sapiens GN=AGAP3 PE=1 SV=2
Q8NI36	WDR36	WD repeat-containing protein 36	-0.872474	-0.416624	-0.626619		21.382	20.425	44	56	17	16	17	16	47140000	59846000	171440000	239940000	30.1	>sp|Q8NI36|WDR36_HUMAN WD repeat-containing protein 36 OS=Homo sapiens GN=WDR36 PE=1 SV=1
Q15031	LARS2	Probable leucine--tRNA ligase, mitochondrial	-0.977097	-0.34426	-0.626254		24.028	18.793	31	41	8	14	8	14	15843000	25518000	88335000	119070000	23.8	>sp|Q15031|SYLM_HUMAN Probable leucine--tRNA ligase, mitochondrial OS=Homo sapiens GN=LARS2 PE=1 SV=2
P48681	NES	Nestin	-0.67437	-0.577248	-0.624992		23.348	26.05	591	694	72	69	72	69	4778100000	6568200000	9616700000	16042000000	58.9	>sp|P48681|NEST_HUMAN Nestin OS=Homo sapiens GN=NES PE=1 SV=2
Q8TED0	UTP15	U3 small nucleolar RNA-associated protein 15 homolog	-0.92235	-0.376957	-0.624033		29.33	16.055	33	50	16	16	16	15	28704000	48830000	130040000	163550000	46.5	>sp|Q8TED0|UTP15_HUMAN U3 small nucleolar RNA-associated protein 15 homolog OS=Homo sapiens GN=UTP15 PE=1 SV=3
Q9NYP7	ELOVL5	Elongation of very long chain fatty acids protein 5	-0.859254	-0.421479	-0.623825		9.7589	21.669	6	2	2	2	2	2	12465000	20033000	1551700	2402200	7.4	>sp|Q9NYP7|ELOV5_HUMAN Elongation of very long chain fatty acids protein 5 OS=Homo sapiens GN=ELOVL5 PE=1 SV=1
Q9Y277	VDAC3	Voltage-dependent anion-selective channel protein 3	-0.74528	-0.510354	-0.623041		15.889	18.79	130	101	12	11	12	11	593200000	780710000	1802200000	2584100000	53.7	>sp|Q9Y277|VDAC3_HUMAN Voltage-dependent anion-selective channel protein 3 OS=Homo sapiens GN=VDAC3 PE=1 SV=1
Q13423	NNT	NAD(P) transhydrogenase, mitochondrial	-1.10105	-0.264597	-0.623032		48.26	17.438	75	113	21	23	21	23	88980000	158960000	597270000	765260000	30.3	>sp|Q13423|NNTM_HUMAN NAD(P) transhydrogenase, mitochondrial OS=Homo sapiens GN=NNT PE=1 SV=3
Q9HC07	TMEM165	Transmembrane protein 165	-0.912726	-0.380951	-0.622475		10.754	54.731	15	20	5	5	5	5	35669000	57793000	93220000	111440000	22.8	>sp|Q9HC07|TM165_HUMAN Transmembrane protein 165 OS=Homo sapiens GN=TMEM165 PE=1 SV=1
O00116	AGPS	Alkyldihydroxyacetonephosphate synthase, peroxisomal	-0.992333	-0.323774	-0.619668		21.246	23.172	232	255	29	29	29	29	750900000	1286600000	2910000000	4027800000	62	>sp|O00116|ADAS_HUMAN Alkyldihydroxyacetonephosphate synthase, peroxisomal OS=Homo sapiens GN=AGPS PE=1 SV=1
Q9H078	CLPB	Caseinolytic peptidase B protein homolog	-0.956131	-0.345169	-0.618547		20.91	18.454	77	91	19	19	19	19	94947000	160070000	410370000	580690000	43.3	>sp|Q9H078|CLPB_HUMAN Caseinolytic peptidase B protein homolog OS=Homo sapiens GN=CLPB PE=1 SV=1
Q96JJ7	TMX3	Protein disulfide-isomerase TMX3	-0.892352	-0.387914	-0.618197		21.488	30.997	22	23	8	8	8	8	21748000	34430000	69761000	100390000	30.8	>sp|Q96JJ7|TMX3_HUMAN Protein disulfide-isomerase TMX3 OS=Homo sapiens GN=TMX3 PE=1 SV=2
Q5T160	RARS2	Probable arginine--tRNA ligase, mitochondrial	-0.998123	-0.316493	-0.617421		22.067	19.377	33	36	12	15	12	15	9325200	15846000	98404000	101400000	36.5	>sp|Q5T160|SYRM_HUMAN Probable arginine--tRNA ligase, mitochondrial OS=Homo sapiens GN=RARS2 PE=1 SV=1
Q96S52	PIGS	GPI transamidase component PIG-S	-0.938925	-0.352307	-0.616003		24.747	18.483	77	43	17	13	17	13	74408000	121230000	173800000	237800000	46.1	>sp|Q96S52|PIGS_HUMAN GPI transamidase component PIG-S OS=Homo sapiens GN=PIGS PE=1 SV=3
P16615	ATP2A2	Sarcoplasmic/endoplasmic reticulum calcium ATPase 2	-0.899253	-0.378512	-0.615513		25.247	31.919	406	494	46	47	38	38	1666400000	2558800000	6395400000	9014600000	52.1	>sp|P16615|AT2A2_HUMAN Sarcoplasmic/endoplasmic reticulum calcium ATPase 2 OS=Homo sapiens GN=ATP2A2 PE=1 SV=1
Q9HD45	TM9SF3	Transmembrane 9 superfamily member 3	-0.855671	-0.408277	-0.6147		25.661	22.727	66	65	10	12	10	12	121170000	185840000	304810000	452570000	22.4	>sp|Q9HD45|TM9S3_HUMAN Transmembrane 9 superfamily member 3 OS=Homo sapiens GN=TM9SF3 PE=1 SV=2
Q8N2F6	ARMC10	Armadillo repeat-containing protein 10	-0.909197	-0.365469	-0.611868		16.45	29.386	25	38	7	8	7	8	20095000	31602000	91282000	126980000	41.1	>sp|Q8N2F6|ARM10_HUMAN Armadillo repeat-containing protein 10 OS=Homo sapiens GN=ARMC10 PE=1 SV=1
Q14571	ITPR2	Inositol 1,4,5-trisphosphate receptor type 2	-0.915712	-0.360982	-0.611847		31.085	17.126	6	14	4	8	4	8	6861300	8867200	10813000	14564000	6.8	>sp|Q14571|ITPR2_HUMAN Inositol 1,4,5-trisphosphate receptor type 2 OS=Homo sapiens GN=ITPR2 PE=1 SV=2
P09110	ACAA1	3-ketoacyl-CoA thiolase, peroxisomal	-0.750864	-0.484911	-0.611768		21.355	15.24	317	216	21	19	21	19	870320000	1295200000	1971600000	3104600000	73.6	>sp|P09110|THIK_HUMAN 3-ketoacyl-CoA thiolase, peroxisomal OS=Homo sapiens GN=ACAA1 PE=1 SV=2
Q9NRZ7	AGPAT3	1-acyl-sn-glycerol-3-phosphate acyltransferase gamma	-1.00834	-0.300182	-0.611241		23.732	39.985	8	8	3	5	3	5	2945300	5495600	21120000	30153000	13.6	>sp|Q9NRZ7|PLCC_HUMAN 1-acyl-sn-glycerol-3-phosphate acyltransferase gamma OS=Homo sapiens GN=AGPAT3 PE=1 SV=1
Q9H845	ACAD9	Acyl-CoA dehydrogenase family member 9, mitochondrial	-1.0263	-0.28404	-0.607953		29.891	17.197	102	134	18	22	18	22	117400000	217580000	693650000	939310000	48.3	>sp|Q9H845|ACAD9_HUMAN Acyl-CoA dehydrogenase family member 9, mitochondrial OS=Homo sapiens GN=ACAD9 PE=1 SV=1
Q92643	PIGK	GPI-anchor transamidase	-0.791356	-0.444773	-0.607682		33.058	20.271	25	30	9	8	9	8	43463000	64795000	98120000	145820000	42	>sp|Q92643|GPI8_HUMAN GPI-anchor transamidase OS=Homo sapiens GN=PIGK PE=1 SV=2
Q5T653	MRPL2	39S ribosomal protein L2, mitochondrial	-0.799253	-0.43776	-0.607214		16.02	20.721	17	10	4	4	4	4	28067000	43525000	33855000	49145000	25.6	>sp|Q5T653|RM02_HUMAN 39S ribosomal protein L2, mitochondrial OS=Homo sapiens GN=MRPL2 PE=1 SV=2
Q3T906	GNPTAB	N-acetylglucosamine-1-phosphotransferase subunits alpha/beta	-0.65764	-0.558464	-0.6072		13.57	22.64	5	5	3	2	3	2	980760	1226900	867870	1252500	5.2	>sp|Q3T906|GNPTA_HUMAN N-acetylglucosamine-1-phosphotransferase subunits alpha/beta OS=Homo sapiens GN=GNPTAB PE=1 SV=1
P51798	CLCN7	H(+)/Cl(-) exchange transporter 7	-0.710526	-0.510557	-0.607079		25	15.359	24	24	10	10	10	10	25694000	32295000	62100000	90093000	22.4	>sp|P51798|CLCN7_HUMAN H(+)/Cl(-) exchange transporter 7 OS=Homo sapiens GN=CLCN7 PE=1 SV=2
Q96EY7	PTCD3	Pentatricopeptide repeat domain-containing protein 3, mitochondrial	-0.93757	-0.336169	-0.605757		26.264	19.642	85	88	18	16	18	16	73192000	126910000	349940000	481350000	44.4	>sp|Q96EY7|PTCD3_HUMAN Pentatricopeptide repeat domain-containing protein 3, mitochondrial OS=Homo sapiens GN=PTCD3 PE=1 SV=3
Q12770	SCAP	Sterol regulatory element-binding protein cleavage-activating protein	-0.959548	-0.321351	-0.605444		76.41	11.465	10	13	6	7	6	7	9095200	9747300	15045000	24122000	13.4	>sp|Q12770|SCAP_HUMAN Sterol regulatory element-binding protein cleavage-activating protein OS=Homo sapiens GN=SCAP PE=1 SV=4
Q8TEQ8	PIGO	GPI ethanolamine phosphate transferase 3	-0.762732	-0.461633	-0.604341		15.361	20.886	12	9	2	4	2	4	718320	1127300	5395500	6153700	6.9	>sp|Q8TEQ8|PIGO_HUMAN GPI ethanolamine phosphate transferase 3 OS=Homo sapiens GN=PIGO PE=1 SV=3
Q96K37	SLC35E1	Solute carrier family 35 member E1	-0.698485	-0.515511	-0.604099		23.916	18.162	7	10	5	6	5	6	5302000	10437000	15007000	21276000	22.4	>sp|Q96K37|S35E1_HUMAN Solute carrier family 35 member E1 OS=Homo sapiens GN=SLC35E1 PE=1 SV=2
P36542	ATP5C1	ATP synthase subunit gamma, mitochondrial	-0.859174	-0.387252	-0.604002		33.751	14.102	48	78	8	11	8	11	292560000	419080000	1767900000	2605600000	37.6	>sp|P36542|ATPG_HUMAN ATP synthase subunit gamma, mitochondrial OS=Homo sapiens GN=ATP5C1 PE=1 SV=1
Q9H6R4	NOL6	Nucleolar protein 6	-0.753262	-0.46874	-0.603998		23.963	28.364	34	42	11	14	11	14	27395000	41942000	141820000	198830000	22.3	>sp|Q9H6R4|NOL6_HUMAN Nucleolar protein 6 OS=Homo sapiens GN=NOL6 PE=1 SV=2
Q9H1X3	DNAJC25	DnaJ homolog subfamily C member 25	-0.969823	-0.309293	-0.602081		103.75	47.819	10	19	5	7	5	7	6062200	26243000	38468000	48369000	23.9	>sp|Q9H1X3|DJC25_HUMAN DnaJ homolog subfamily C member 25 OS=Homo sapiens GN=DNAJC25 PE=2 SV=1
O76024	WFS1	Wolframin	-0.89724	-0.356256	-0.601538		46.237	29.132	52	75	17	13	17	13	54770000	89941000	248060000	335160000	29	>sp|O76024|WFS1_HUMAN Wolframin OS=Homo sapiens GN=WFS1 PE=1 SV=2
O60313	OPA1	Dynamin-like 120 kDa protein, mitochondrial	-0.961031	-0.313478	-0.601224		25.637	20.401	71	93	24	30	24	30	70651000	128030000	393360000	520620000	45.2	>sp|O60313|OPA1_HUMAN Dynamin-like 120 kDa protein, mitochondrial OS=Homo sapiens GN=OPA1 PE=1 SV=3
Q9NVV4	MTPAP	Poly(A) RNA polymerase, mitochondrial	-1.02056	-0.275603	-0.600521		24.771	32.756	25	22	8	8	8	8	16731000	31331000	76691000	96546000	23.7	>sp|Q9NVV4|PAPD1_HUMAN Poly(A) RNA polymerase, mitochondrial OS=Homo sapiens GN=MTPAP PE=1 SV=1
Q15269	PWP2	Periodic tryptophan protein 2 homolog	-0.998412	-0.285343	-0.598263		17.832	36.141	41	36	12	12	12	12	18017000	31828000	106380000	142160000	27.9	>sp|Q15269|PWP2_HUMAN Periodic tryptophan protein 2 homolog OS=Homo sapiens GN=PWP2 PE=1 SV=2
Q9UKR5	C14orf1	Probable ergosterol biosynthetic protein 28	-0.74123	-0.464982	-0.596504		60.808	11.99	15	25	4	2	4	2	33013000	49132000	252980000	402080000	26.4	>sp|Q9UKR5|ERG28_HUMAN Probable ergosterol biosynthetic protein 28 OS=Homo sapiens GN=C14orf1 PE=1 SV=1
Q5T9A4	ATAD3B	ATPase family AAA domain-containing protein 3B	-1.05956	-0.246469	-0.596476		33.353	15.865	134	151	25	24	10	7	425060000	763670000	1921200000	2775600000	51.9	>sp|Q5T9A4|ATD3B_HUMAN ATPase family AAA domain-containing protein 3B OS=Homo sapiens GN=ATAD3B PE=1 SV=1
Q53S58	TMEM177	Transmembrane protein 177	-0.91219	-0.335026	-0.594936		22.599	30.024	7	9	3	3	3	3	33547000	42833000	22449000	30070000	10.6	>sp|Q53S58|TM177_HUMAN Transmembrane protein 177 OS=Homo sapiens GN=TMEM177 PE=2 SV=1
P53007	SLC25A1	Tricarboxylate transport protein, mitochondrial	-1.10467	-0.215119	-0.592394		13.35	33.927	65	56	9	8	9	8	460110000	744650000	1926700000	2545500000	36.7	>sp|P53007|TXTP_HUMAN Tricarboxylate transport protein, mitochondrial OS=Homo sapiens GN=SLC25A1 PE=1 SV=2
Q9BVK2	ALG8	Probable dolichyl pyrophosphate Glc1Man9GlcNAc2 alpha-1,3-glucosyltransferase	-0.793355	-0.415867	-0.592299		15.964	6.7146	11	6	4	2	4	2	13304000	19080000	62899000	94320000	9.7	>sp|Q9BVK2|ALG8_HUMAN Probable dolichyl pyrophosphate Glc1Man9GlcNAc2 alpha-1,3-glucosyltransferase OS=Homo sapiens GN=ALG8 PE=1 SV=2
Q9NW15	ANO10	Anoctamin-10	-0.845349	-0.375623	-0.591453		38.934	26.908	29	31	8	9	8	9	13892000	21947000	79136000	112590000	22.6	>sp|Q9NW15|ANO10_HUMAN Anoctamin-10 OS=Homo sapiens GN=ANO10 PE=1 SV=2
P38435	GGCX	Vitamin K-dependent gamma-carboxylase	-0.858697	-0.364124	-0.590321		26.698	21.878	58	59	12	12	12	12	68866000	107430000	287340000	404750000	18.6	>sp|P38435|VKGC_HUMAN Vitamin K-dependent gamma-carboxylase OS=Homo sapiens GN=GGCX PE=1 SV=2
Q00325	SLC25A3	Phosphate carrier protein, mitochondrial	-1.09754	-0.214498	-0.589488		23.974	23.67	111	125	14	11	14	11	1141600000	2301300000	5579800000	7269100000	36.2	>sp|Q00325|MPCP_HUMAN Phosphate carrier protein, mitochondrial OS=Homo sapiens GN=SLC25A3 PE=1 SV=2
A0FGR8	ESYT2	Extended synaptotagmin-2	-0.766129	-0.431783	-0.589292		26.093	22.818	47	61	17	16	17	16	35591000	53214000	128350000	187350000	25.6	>sp|A0FGR8|ESYT2_HUMAN Extended synaptotagmin-2 OS=Homo sapiens GN=ESYT2 PE=1 SV=1
Q9BQ39	DDX50	ATP-dependent RNA helicase DDX50	-0.691802	-0.49293	-0.588942		20.768	16.094	26	20	9	7	9	7	18435000	24365000	19552000	29687000	25.1	>sp|Q9BQ39|DDX50_HUMAN ATP-dependent RNA helicase DDX50 OS=Homo sapiens GN=DDX50 PE=1 SV=1
Q99797	MIPEP	Mitochondrial intermediate peptidase	-0.849599	-0.364909	-0.586994		24.648	25.218	23	25	11	9	11	9	66947000	62925000	101340000	89751000	26.4	>sp|Q99797|MIPEP_HUMAN Mitochondrial intermediate peptidase OS=Homo sapiens GN=MIPEP PE=1 SV=2
Q6UB35	MTHFD1L	Monofunctional C1-tetrahydrofolate synthase, mitochondrial	-0.926303	-0.311968	-0.58668		23.385	17.492	101	109	23	23	23	23	135700000	204890000	407400000	533100000	34.5	>sp|Q6UB35|C1TM_HUMAN Monofunctional C1-tetrahydrofolate synthase, mitochondrial OS=Homo sapiens GN=MTHFD1L PE=1 SV=1
Q9NVH1	DNAJC11	DnaJ homolog subfamily C member 11	-0.828956	-0.378734	-0.586353		14.038	33.446	29	37	13	12	13	12	52771000	82202000	259630000	320010000	41.7	>sp|Q9NVH1|DJC11_HUMAN DnaJ homolog subfamily C member 11 OS=Homo sapiens GN=DNAJC11 PE=1 SV=2
Q7Z7H8	MRPL10	39S ribosomal protein L10, mitochondrial	-0.810237	-0.391108	-0.585505		16.351	16.825	27	22	3	4	3	4	18015000	29328000	24809000	32297000	22.2	>sp|Q7Z7H8|RM10_HUMAN 39S ribosomal protein L10, mitochondrial OS=Homo sapiens GN=MRPL10 PE=1 SV=3
Q8WUM0	NUP133	Nuclear pore complex protein Nup133	-0.807602	-0.391768	-0.584754		26.995	15.363	108	112	33	29	33	29	168560000	244130000	531650000	772840000	42	>sp|Q8WUM0|NU133_HUMAN Nuclear pore complex protein Nup133 OS=Homo sapiens GN=NUP133 PE=1 SV=2
Q8IVI9	NOSTRIN	Nostrin	-0.756682	-0.430071	-0.584153		18.289	31.763	27	26	9	14	9	14	15463000	24852000	49777000	66928000	39.1	>sp|Q8IVI9|NOSTN_HUMAN Nostrin OS=Homo sapiens GN=NOSTRIN PE=1 SV=2
Q9Y256	RCE1	CAAX prenyl protease 2	-0.906968	-0.319271	-0.583399		24.152	6.9975	16	12	3	3	3	3	10874000	17636000	32338000	47949000	16.4	>sp|Q9Y256|FACE2_HUMAN CAAX prenyl protease 2 OS=Homo sapiens GN=RCE1 PE=1 SV=1
Q02978	SLC25A11	Mitochondrial 2-oxoglutarate/malate carrier protein	-0.993421	-0.264356	-0.583316		16.708	14.581	63	59	12	12	12	12	55058000	97846000	388780000	517050000	51.9	>sp|Q02978|M2OM_HUMAN Mitochondrial 2-oxoglutarate/malate carrier protein OS=Homo sapiens GN=SLC25A11 PE=1 SV=3
P46977	STT3A	Dolichyl-diphosphooligosaccharide--protein glycosyltransferase subunit STT3A	-0.957023	-0.286763	-0.583314		33.839	24.019	124	116	19	18	19	18	431380000	678560000	2144700000	2963000000	29.1	>sp|P46977|STT3A_HUMAN Dolichyl-diphosphooligosaccharide--protein glycosyltransferase subunit STT3A OS=Homo sapiens GN=STT3A PE=1 SV=2
Q9UKG9	CROT	Peroxisomal carnitine O-octanoyltransferase	-0.786513	-0.404576	-0.582942		17.664	15.614	21	18	9	7	9	7	5885600	8775000	15190000	20509000	25.8	>sp|Q9UKG9|OCTC_HUMAN Peroxisomal carnitine O-octanoyltransferase OS=Homo sapiens GN=CROT PE=1 SV=2
Q8IYB8	SUPV3L1	ATP-dependent RNA helicase SUPV3L1, mitochondrial	-0.872553	-0.340619	-0.582208		26.623	23.975	21	25	12	16	12	16	19798000	25581000	72270000	92836000	27.6	>sp|Q8IYB8|SUV3_HUMAN ATP-dependent RNA helicase SUPV3L1, mitochondrial OS=Homo sapiens GN=SUPV3L1 PE=1 SV=1
Q9BUN8	DERL1	Derlin-1	-0.695192	-0.474566	-0.580666		9.0374	11.216	6	3	2	2	2	2	10037000	14148000	2934700	4802900	10.8	>sp|Q9BUN8|DERL1_HUMAN Derlin-1 OS=Homo sapiens GN=DERL1 PE=1 SV=1
Q9NR30	DDX21	Nucleolar RNA helicase 2	-0.791022	-0.396379	-0.580248		22.332	21.321	250	246	39	37	37	35	972650000	1409200000	3401200000	5164000000	57	>sp|Q9NR30|DDX21_HUMAN Nucleolar RNA helicase 2 OS=Homo sapiens GN=DDX21 PE=1 SV=5
Q9H0U3	MAGT1	Magnesium transporter protein 1	-0.897473	-0.320196	-0.580151		17.3	35.892	19	21	7	6	7	6	26146000	44114000	89282000	110310000	21.2	>sp|Q9H0U3|MAGT1_HUMAN Magnesium transporter protein 1 OS=Homo sapiens GN=MAGT1 PE=1 SV=1
P17152	TMEM11	Transmembrane protein 11, mitochondrial	-0.411426	-0.768841	-0.579093		19.379	55.859	9	4	3	2	3	2	16791000	19085000	21568000	34078000	18.2	>sp|P17152|TMM11_HUMAN Transmembrane protein 11, mitochondrial OS=Homo sapiens GN=TMEM11 PE=1 SV=1
P25705	ATP5A1	ATP synthase subunit alpha, mitochondrial	-0.948078	-0.282973	-0.577532		19.335	16.555	410	496	29	25	29	25	3996200000	6763100000	23518000000	32454000000	57.3	>sp|P25705|ATPA_HUMAN ATP synthase subunit alpha, mitochondrial OS=Homo sapiens GN=ATP5A1 PE=1 SV=1
Q12981	BNIP1	Vesicle transport protein SEC20	-0.60483	-0.550113	-0.577212		26.091	17.575	25	13	12	7	12	7	41852000	48852000	86807000	92742000	63.2	>sp|Q12981|SEC20_HUMAN Vesicle transport protein SEC20 OS=Homo sapiens GN=BNIP1 PE=1 SV=3
Q13724	MOGS	Mannosyl-oligosaccharide glucosidase	-0.878215	-0.326307	-0.576029		20.899	22.929	125	77	20	17	20	17	144350000	243670000	468910000	703980000	35.5	>sp|Q13724|MOGS_HUMAN Mannosyl-oligosaccharide glucosidase OS=Homo sapiens GN=MOGS PE=1 SV=5
Q9Y2G8	DNAJC16	DnaJ homolog subfamily C member 16	-0.863304	-0.336512	-0.575996		27.384	15.136	24	15	7	5	7	5	7125200	10638000	10842000	13643000	14.3	>sp|Q9Y2G8|DJC16_HUMAN DnaJ homolog subfamily C member 16 OS=Homo sapiens GN=DNAJC16 PE=2 SV=3
Q14573	ITPR3	Inositol 1,4,5-trisphosphate receptor type 3	-0.839557	-0.349931	-0.574072		16.97	18.779	33	41	16	20	14	18	21849000	35981000	49958000	68959000	16.5	>sp|Q14573|ITPR3_HUMAN Inositol 1,4,5-trisphosphate receptor type 3 OS=Homo sapiens GN=ITPR3 PE=1 SV=2
Q8WWC4	C2orf47	Uncharacterized protein C2orf47, mitochondrial	-0.713168	-0.446468	-0.573664		37.223	50.152	13	21	4	7	4	7	73201000	23983000	114600000	163350000	24.1	>sp|Q8WWC4|CB047_HUMAN Uncharacterized protein C2orf47, mitochondrial OS=Homo sapiens GN=C2orf47 PE=1 SV=1
O43772	SLC25A20	Mitochondrial carnitine/acylcarnitine carrier protein	-0.916018	-0.296545	-0.573285		19.733	23.25	81	88	16	15	16	15	168970000	309540000	788640000	975050000	56.8	>sp|O43772|MCAT_HUMAN Mitochondrial carnitine/acylcarnitine carrier protein OS=Homo sapiens GN=SLC25A20 PE=1 SV=1
Q10471	GALNT2	Polypeptide N-acetylgalactosaminyltransferase 2	-0.720366	-0.439783	-0.573264		24.072	18.005	119	127	23	23	22	22	231310000	343340000	645130000	983520000	52.7	>sp|Q10471|GALT2_HUMAN Polypeptide N-acetylgalactosaminyltransferase 2 OS=Homo sapiens GN=GALNT2 PE=1 SV=1
Q9BSC4	NOL10	Nucleolar protein 10	-0.796265	-0.377068	-0.571495		23.232	29.239	31	45	10	12	10	12	28708000	41955000	101100000	131360000	32.4	>sp|Q9BSC4|NOL10_HUMAN Nucleolar protein 10 OS=Homo sapiens GN=NOL10 PE=1 SV=1
Q8TCT9	HM13	Minor histocompatibility antigen H13	-0.889318	-0.310922	-0.571326		39.48	16.552	77	131	9	9	9	9	821180000	1321700000	1596800000	2351400000	24.9	>sp|Q8TCT9|HM13_HUMAN Minor histocompatibility antigen H13 OS=Homo sapiens GN=HM13 PE=1 SV=1
Q9HA82	CERS4	Ceramide synthase 4	-1.09667	-0.18409	-0.569394		15.966	23.899	8	4	2	2	2	2	2304700	4996300	4842800	5174900	12.2	>sp|Q9HA82|CERS4_HUMAN Ceramide synthase 4 OS=Homo sapiens GN=CERS4 PE=1 SV=2
Q9BW92	TARS2	Threonine--tRNA ligase, mitochondrial	-0.888539	-0.306845	-0.568571		28.07	16.409	24	21	12	12	12	12	19536000	29210000	125260000	43307000	35.5	>sp|Q9BW92|SYTM_HUMAN Threonine--tRNA ligase, mitochondrial OS=Homo sapiens GN=TARS2 PE=1 SV=1
Q03135	CAV1	Caveolin-1	-0.536252	-0.600936	-0.568231		9.9533	19.514	11	13	2	2	2	2	5572100	8082800	52734000	81514000	16.3	>sp|Q03135|CAV1_HUMAN Caveolin-1 OS=Homo sapiens GN=CAV1 PE=1 SV=4
Q8N442	GUF1	Translation factor GUF1, mitochondrial	-1.09349	-0.183074	-0.567628		35.649	20.052	5	5	3	3	3	3	1718300	3207800	6816700	6581700	13.3	>sp|Q8N442|GUF1_HUMAN Translation factor GUF1, mitochondrial OS=Homo sapiens GN=GUF1 PE=1 SV=1
P98194	ATP2C1	Calcium-transporting ATPase type 2C member 1	-0.701859	-0.441271	-0.56569		35.771	22.717	32	35	14	17	14	17	27846000	43719000	79158000	115660000	34.6	>sp|P98194|AT2C1_HUMAN Calcium-transporting ATPase type 2C member 1 OS=Homo sapiens GN=ATP2C1 PE=1 SV=3
P53801	PTTG1IP	Pituitary tumor-transforming gene 1 protein-interacting protein	-0.610322	-0.51924	-0.564062		14.115	9.1819	24	17	2	2	2	2	60962000	78155000	134950000	226560000	16.1	>sp|P53801|PTTG_HUMAN Pituitary tumor-transforming gene 1 protein-interacting protein OS=Homo sapiens GN=PTTG1IP PE=1 SV=1
Q9P2C4	TMEM181	Transmembrane protein 181	-0.737773	-0.408929	-0.564002		103.63	14.308	6	11	2	4	2	4	10400000	12696000	58309000	81452000	6.5	>sp|Q9P2C4|TM181_HUMAN Transmembrane protein 181 OS=Homo sapiens GN=TMEM181 PE=1 SV=2
Q15836	VAMP3	Vesicle-associated membrane protein 3	-0.439889	-0.697507	-0.562955		9.8281	15.752	31	53	4	4	1	1	302040000	351600000	336730000	602750000	40	>sp|Q15836|VAMP3_HUMAN Vesicle-associated membrane protein 3 OS=Homo sapiens GN=VAMP3 PE=1 SV=3
Q9BSJ8	ESYT1	Extended synaptotagmin-1	-0.846313	-0.322966	-0.561038		26.646	32.666	363	320	45	43	45	43	798020000	1266700000	2498900000	3498000000	57.3	>sp|Q9BSJ8|ESYT1_HUMAN Extended synaptotagmin-1 OS=Homo sapiens GN=ESYT1 PE=1 SV=1
Q03701	CEBPZ	CCAAT/enhancer-binding protein zeta	-0.854953	-0.316609	-0.560815		21.361	20.65	82	93	20	25	20	25	57528000	95679000	224580000	313640000	32.9	>sp|Q03701|CEBPZ_HUMAN CCAAT/enhancer-binding protein zeta OS=Homo sapiens GN=CEBPZ PE=1 SV=3
Q9NSE4	IARS2	Isoleucine--tRNA ligase, mitochondrial	-0.954494	-0.25084	-0.560186		25.728	17.615	241	214	34	34	34	34	546600000	873360000	2386700000	3130900000	46.7	>sp|Q9NSE4|SYIM_HUMAN Isoleucine--tRNA ligase, mitochondrial OS=Homo sapiens GN=IARS2 PE=1 SV=2
Q8IYU8	MICU2	Calcium uptake protein 2, mitochondrial	-0.974089	-0.238542	-0.559938		14.37	13.888	6	4	2	3	2	3	2758200	4564400	4992100	4571500	12.7	>sp|Q8IYU8|MICU2_HUMAN Calcium uptake protein 2, mitochondrial OS=Homo sapiens GN=MICU2 PE=1 SV=2
Q92552	MRPS27	28S ribosomal protein S27, mitochondrial	-0.739589	-0.398022	-0.55872		53.091	21.638	64	66	15	14	15	14	76127000	109840000	400200000	581680000	40.1	>sp|Q92552|RT27_HUMAN 28S ribosomal protein S27, mitochondrial OS=Homo sapiens GN=MRPS27 PE=1 SV=3
Q9BWS9	CHID1	Chitinase domain-containing protein 1	-0.567545	-0.549521	-0.558505		49.94	14.847	15	11	6	4	6	4	10333000	11871000	25517000	42986000	32.6	>sp|Q9BWS9|CHID1_HUMAN Chitinase domain-containing protein 1 OS=Homo sapiens GN=CHID1 PE=1 SV=1
Q8TB61	SLC35B2	Adenosine 3-phospho 5-phosphosulfate transporter 1	-0.878922	-0.295723	-0.558052		31.377	34.238	14	11	5	5	5	5	15658000	25196000	55526000	77632000	19.9	>sp|Q8TB61|S35B2_HUMAN Adenosine 3-phospho 5-phosphosulfate transporter 1 OS=Homo sapiens GN=SLC35B2 PE=1 SV=1
P48651	PTDSS1	Phosphatidylserine synthase 1	-0.801655	-0.347326	-0.556679		18.99	19.057	4	8	4	3	4	3	4946100	7773800	30274000	43218000	11.8	>sp|P48651|PTSS1_HUMAN Phosphatidylserine synthase 1 OS=Homo sapiens GN=PTDSS1 PE=1 SV=1
Q9NP74	PALMD	Palmdelphin	-0.559639	-0.553066	-0.556348		19.059	16.454	10	15	5	5	5	5	10380000	13114000	19272000	31884000	25	>sp|Q9NP74|PALMD_HUMAN Palmdelphin OS=Homo sapiens GN=PALMD PE=1 SV=1
Q96CU9	FOXRED1	FAD-dependent oxidoreductase domain-containing protein 1	-0.915636	-0.267476	-0.555458		17.849	18.348	30	42	8	11	8	11	44165000	71353000	147080000	202340000	30.9	>sp|Q96CU9|FXRD1_HUMAN FAD-dependent oxidoreductase domain-containing protein 1 OS=Homo sapiens GN=FOXRED1 PE=1 SV=2
Q9NZ08	ERAP1	Endoplasmic reticulum aminopeptidase 1	-0.487178	-0.626766	-0.555284		25.852	20.171	48	71	18	22	18	22	41103000	49713000	245490000	415440000	37.6	>sp|Q9NZ08|ERAP1_HUMAN Endoplasmic reticulum aminopeptidase 1 OS=Homo sapiens GN=ERAP1 PE=1 SV=3
O75694	NUP155	Nuclear pore complex protein Nup155	-0.781486	-0.357946	-0.554229		24.244	25.657	194	164	37	31	37	31	274900000	393710000	757580000	1153900000	41.9	>sp|O75694|NU155_HUMAN Nuclear pore complex protein Nup155 OS=Homo sapiens GN=NUP155 PE=1 SV=1
Q7KZN9	COX15	Cytochrome c oxidase assembly protein COX15 homolog	-1.00094	-0.213129	-0.553914		12.651	20.496	7	10	3	3	3	3	1451000	2696600	7289000	8832700	12.7	>sp|Q7KZN9|COX15_HUMAN Cytochrome c oxidase assembly protein COX15 homolog OS=Homo sapiens GN=COX15 PE=1 SV=1
O15091	KIAA0391	Mitochondrial ribonuclease P protein 3	-0.880098	-0.283448	-0.551146		20.269	20.906	6	17	2	6	2	6	684630	1057300	18067000	22284000	17	>sp|O15091|MRRP3_HUMAN Mitochondrial ribonuclease P protein 3 OS=Homo sapiens GN=KIAA0391 PE=1 SV=2
Q96TA2	YME1L1	ATP-dependent zinc metalloprotease YME1L1	-0.818196	-0.325847	-0.55112		24.343	15.661	89	78	17	20	17	20	107480000	168270000	378110000	378630000	33.4	>sp|Q96TA2|YMEL1_HUMAN ATP-dependent zinc metalloprotease YME1L1 OS=Homo sapiens GN=YME1L1 PE=1 SV=2
Q9BTX1	NDC1	Nucleoporin NDC1	-0.840121	-0.309991	-0.550841		18.509	33.571	44	45	10	11	10	11	31389000	48365000	143270000	171590000	30.6	>sp|Q9BTX1|NDC1_HUMAN Nucleoporin NDC1 OS=Homo sapiens GN=NDC1 PE=1 SV=2
Q8N0U8	VKORC1L1	Vitamin K epoxide reductase complex subunit 1-like protein 1	-0.753005	-0.373286	-0.550689		8.0758	22.902	6	13	3	4	3	4	9883800	14039000	62010000	82370000	19.9	>sp|Q8N0U8|VKORL_HUMAN Vitamin K epoxide reductase complex subunit 1-like protein 1 OS=Homo sapiens GN=VKORC1L1 PE=1 SV=2
Q5SWX8	ODR4	Protein odr-4 homolog	-0.839637	-0.309176	-0.550162		21.062	19.695	11	19	7	8	7	8	9278600	14476000	38369000	56544000	30.2	>sp|Q5SWX8|ODR4_HUMAN Protein odr-4 homolog OS=Homo sapiens GN=ODR4 PE=2 SV=1
O76021	RSL1D1	Ribosomal L1 domain-containing protein 1	-0.769179	-0.357946	-0.54896		24.082	17.304	101	80	20	16	20	16	344990000	408180000	704180000	1005000000	43.5	>sp|O76021|RL1D1_HUMAN Ribosomal L1 domain-containing protein 1 OS=Homo sapiens GN=RSL1D1 PE=1 SV=3
Q8N8A6	DDX51	ATP-dependent RNA helicase DDX51	-0.881508	-0.278817	-0.548917		59.038	22.016	16	36	9	12	9	12	12736000	20724000	63424000	74699000	30.3	>sp|Q8N8A6|DDX51_HUMAN ATP-dependent RNA helicase DDX51 OS=Homo sapiens GN=DDX51 PE=1 SV=3
Q96BW9	TAMM41	Mitochondrial translocator assembly and maintenance protein 41 homolog	-1.00978	-0.198745	-0.548005		40.024	12.902	7	10	3	4	3	4	8659100	16080000	25430000	28592000	25	>sp|Q96BW9|TAM41_HUMAN Mitochondrial translocator assembly and maintenance protein 41 homolog OS=Homo sapiens GN=TAMM41 PE=2 SV=1
O60503	ADCY9	Adenylate cyclase type 9	-0.553164	-0.542109	-0.547626		13.861	16.24	6	9	3	4	3	4	3061100	3951900	7147700	13217000	5.8	>sp|O60503|ADCY9_HUMAN Adenylate cyclase type 9 OS=Homo sapiens GN=ADCY9 PE=1 SV=4
Q9Y305	ACOT9	Acyl-coenzyme A thioesterase 9, mitochondrial	-0.845671	-0.298776	-0.546462		16.996	12.176	34	38	14	13	14	13	27044000	41444000	173440000	173150000	43.1	>sp|Q9Y305|ACOT9_HUMAN Acyl-coenzyme A thioesterase 9, mitochondrial OS=Homo sapiens GN=ACOT9 PE=1 SV=2
Q8TD22	SFXN5	Sideroflexin-5	-0.907506	-0.256648	-0.545681		10.485	14.406	4	5	2	2	2	2	1509900	2725100	10328000	13177000	5.6	>sp|Q8TD22|SFXN5_HUMAN Sideroflexin-5 OS=Homo sapiens GN=SFXN5 PE=2 SV=1
P08962	CD63	CD63 antigen	-0.642101	-0.454913	-0.545473		66.864	20.189	62	34	4	5	4	5	329900000	393780000	899080000	1213600000	21.8	>sp|P08962|CD63_HUMAN CD63 antigen OS=Homo sapiens GN=CD63 PE=1 SV=2
Q9Y4W6	AFG3L2	AFG3-like protein 2	-0.903115	-0.258338	-0.545002		24.535	17.627	257	243	39	38	38	37	634240000	801430000	1818600000	2397200000	58.2	>sp|Q9Y4W6|AFG32_HUMAN AFG3-like protein 2 OS=Homo sapiens GN=AFG3L2 PE=1 SV=2
P57740	NUP107	Nuclear pore complex protein Nup107	-0.752235	-0.363451	-0.544786		14.239	22.897	93	130	25	31	25	31	93483000	132970000	365670000	494630000	53.8	>sp|P57740|NU107_HUMAN Nuclear pore complex protein Nup107 OS=Homo sapiens GN=NUP107 PE=1 SV=1
Q8N766	EMC1	ER membrane protein complex subunit 1	-0.872238	-0.274411	-0.542577		36.318	20.599	94	98	23	26	23	26	116920000	184700000	510210000	650310000	41.1	>sp|Q8N766|EMC1_HUMAN ER membrane protein complex subunit 1 OS=Homo sapiens GN=EMC1 PE=1 SV=1
Q86SF2	GALNT7	N-acetylgalactosaminyltransferase 7	-0.681494	-0.415759	-0.542517		8.0474	27.9	4	13	3	4	3	4	3702300	6090300	15610000	21493000	14.8	>sp|Q86SF2|GALT7_HUMAN N-acetylgalactosaminyltransferase 7 OS=Homo sapiens GN=GALNT7 PE=1 SV=1
Q99798	ACO2	Aconitate hydratase, mitochondrial	-0.774334	-0.341303	-0.541632		29.275	21.604	371	347	41	40	41	40	1379100000	2013600000	4308100000	5873000000	66.9	>sp|Q99798|ACON_HUMAN Aconitate hydratase, mitochondrial OS=Homo sapiens GN=ACO2 PE=1 SV=2
P40939	HADHA	Trifunctional enzyme subunit alpha, mitochondrial	-0.892119	-0.259062	-0.541142		21.681	17.275	430	385	40	34	40	34	1516400000	2366500000	6229700000	8312000000	62.9	>sp|P40939|ECHA_HUMAN Trifunctional enzyme subunit alpha, mitochondrial OS=Homo sapiens GN=HADHA PE=1 SV=2
Q9H936	SLC25A22	Mitochondrial glutamate carrier 1	-0.960215	-0.211386	-0.537752		25.805	12.695	23	26	8	7	4	4	25508000	45433000	102510000	131090000	26.3	>sp|Q9H936|GHC1_HUMAN Mitochondrial glutamate carrier 1 OS=Homo sapiens GN=SLC25A22 PE=1 SV=1
P27105	STOM	Erythrocyte band 7 integral membrane protein	-0.593688	-0.482435	-0.53699		21.882	12.668	131	119	13	11	13	11	538390000	733070000	2076900000	3394900000	56.9	>sp|P27105|STOM_HUMAN Erythrocyte band 7 integral membrane protein OS=Homo sapiens GN=STOM PE=1 SV=3
Q9NP58	ABCB6	ATP-binding cassette sub-family B member 6, mitochondrial	-0.618896	-0.459432	-0.536962		29.047	22.809	87	83	16	15	16	14	128890000	172540000	333250000	443960000	34.3	>sp|Q9NP58|ABCB6_HUMAN ATP-binding cassette sub-family B member 6, mitochondrial OS=Homo sapiens GN=ABCB6 PE=1 SV=1
Q3ZCQ8	TIMM50	Mitochondrial import inner membrane translocase subunit TIM50	-0.860447	-0.27274	-0.536871		27.523	33.025	58	60	10	11	10	11	153030000	221640000	403610000	558500000	39.4	>sp|Q3ZCQ8|TIM50_HUMAN Mitochondrial import inner membrane translocase subunit TIM50 OS=Homo sapiens GN=TIMM50 PE=1 SV=2
Q6UW02	CYP20A1	Cytochrome P450 20A1	-0.69537	-0.393636	-0.536629		17.162	35.584	43	54	13	15	13	15	39380000	53117000	248500000	327990000	54.3	>sp|Q6UW02|CP20A_HUMAN Cytochrome P450 20A1 OS=Homo sapiens GN=CYP20A1 PE=2 SV=1
Q9UNX4	WDR3	WD repeat-containing protein 3	-0.808261	-0.308011	-0.536562		30.437	24.46	47	39	17	13	17	13	18923000	28181000	95264000	133630000	31.2	>sp|Q9UNX4|WDR3_HUMAN WD repeat-containing protein 3 OS=Homo sapiens GN=WDR3 PE=1 SV=1
Q9H490	PIGU	Phosphatidylinositol glycan anchor biosynthesis class U protein	-0.705403	-0.38405	-0.535797		12.076	13.077	17	32	3	4	3	4	9434900	13254000	60557000	86230000	11	>sp|Q9H490|PIGU_HUMAN Phosphatidylinositol glycan anchor biosynthesis class U protein OS=Homo sapiens GN=PIGU PE=1 SV=3
P00505	GOT2	Aspartate aminotransferase, mitochondrial	-0.735349	-0.360196	-0.535612		37.419	22.63	202	186	24	19	24	19	1215100000	1682400000	3348200000	4681400000	64.9	>sp|P00505|AATM_HUMAN Aspartate aminotransferase, mitochondrial OS=Homo sapiens GN=GOT2 PE=1 SV=3
Q9NPL8	TIMMDC1	Translocase of inner mitochondrial membrane domain-containing protein 1	-0.99081	-0.189919	-0.535489		47.655	16.876	21	22	6	7	6	7	16171000	26119000	94373000	122780000	29.8	>sp|Q9NPL8|TIDC1_HUMAN Translocase of inner mitochondrial membrane domain-containing protein 1 OS=Homo sapiens GN=TIMMDC1 PE=1 SV=2
P36776	LONP1	Lon protease homolog, mitochondrial	-0.920903	-0.230695	-0.534911		24.262	17.434	315	331	42	39	42	39	732980000	1259500000	2721300000	3445100000	56.6	>sp|P36776|LONM_HUMAN Lon protease homolog, mitochondrial OS=Homo sapiens GN=LONP1 PE=1 SV=2
O75356	ENTPD5	Ectonucleoside triphosphate diphosphohydrolase 5	-0.442758	-0.632082	-0.534316		20.626	39.476	43	52	9	12	9	12	52785000	69917000	203200000	353500000	43.9	>sp|O75356|ENTP5_HUMAN Ectonucleoside triphosphate diphosphohydrolase 5 OS=Homo sapiens GN=ENTPD5 PE=1 SV=1
O00214	LGALS8	Galectin-8	-0.699818	-0.385376	-0.534047		58.031	24.076	7	7	4	4	4	4	13790000	12783000	17234000	17679000	21.8	>sp|O00214|LEG8_HUMAN Galectin-8 OS=Homo sapiens GN=LGALS8 PE=1 SV=4
Q96EU7	C1GALT1C1	C1GALT1-specific chaperone 1	-0.841168	-0.280956	-0.534039		4.2823	29.278	7	9	3	3	3	3	3356700	4777600	16515000	22192000	17.3	>sp|Q96EU7|C1GLC_HUMAN C1GALT1-specific chaperone 1 OS=Homo sapiens GN=C1GALT1C1 PE=1 SV=1
Q9NRG9	AAAS	Aladin	-0.816886	-0.297133	-0.533729		27.167	19.805	58	49	14	12	14	12	89438000	116040000	132600000	181040000	45.2	>sp|Q9NRG9|AAAS_HUMAN Aladin OS=Homo sapiens GN=AAAS PE=1 SV=1
Q96ND0	FAM210A	Protein FAM210A	-0.481299	-0.587845	-0.533589		22.273	18.395	7	4	2	2	2	2	5408700	5489800	5914700	8059100	10.3	>sp|Q96ND0|F210A_HUMAN Protein FAM210A OS=Homo sapiens GN=FAM210A PE=1 SV=2
O60669	SLC16A7	Monocarboxylate transporter 2	-0.509949	-0.557091	-0.533328		12.393	26.397	7	13	3	4	3	4	3407800	4407300	23721000	40159000	13.2	>sp|O60669|MOT2_HUMAN Monocarboxylate transporter 2 OS=Homo sapiens GN=SLC16A7 PE=2 SV=2
Q9Y6N5	SQRDL	Sulfide:quinone oxidoreductase, mitochondrial	-0.857264	-0.268794	-0.53323		102.88	16.919	31	25	11	13	11	13	68862000	58962000	64221000	90010000	49.3	>sp|Q9Y6N5|SQRD_HUMAN Sulfide:quinone oxidoreductase, mitochondrial OS=Homo sapiens GN=SQRDL PE=1 SV=1
Q96EL2	MRPS24	28S ribosomal protein S24, mitochondrial	-0.696528	-0.384713	-0.532213		64.139	66.067	13	16	5	4	5	4	7300400	8638400	33480000	41465000	33.5	>sp|Q96EL2|RT24_HUMAN 28S ribosomal protein S24, mitochondrial OS=Homo sapiens GN=MRPS24 PE=1 SV=1
Q9BSF4	C19orf52	Uncharacterized protein C19orf52	-0.8062	-0.301822	-0.532081		27.831	16.304	23	29	5	6	5	6	39229000	62823000	102270000	135740000	40	>sp|Q9BSF4|CS052_HUMAN Uncharacterized protein C19orf52 OS=Homo sapiens GN=C19orf52 PE=1 SV=2
P51790	CLCN3	H(+)/Cl(-) exchange transporter 3	-0.562377	-0.501414	-0.531573		31.985	20.601	5	6	3	2	3	2	9777300	4441300	4131900	4816300	6.2	>sp|P51790|CLCN3_HUMAN H(+)/Cl(-) exchange transporter 3 OS=Homo sapiens GN=CLCN3 PE=1 SV=2
Q6DD88	ATL3	Atlastin-3	-0.727354	-0.358171	-0.530985		20.598	22.051	261	227	24	21	24	21	1085300000	1626000000	3100600000	4336400000	64	>sp|Q6DD88|ATLA3_HUMAN Atlastin-3 OS=Homo sapiens GN=ATL3 PE=1 SV=1
Q6PI48	DARS2	Aspartate--tRNA ligase, mitochondrial	-0.868608	-0.257493	-0.530932		24.443	16.765	94	101	20	19	20	19	178510000	296230000	619700000	820830000	49.8	>sp|Q6PI48|SYDM_HUMAN Aspartate--tRNA ligase, mitochondrial OS=Homo sapiens GN=DARS2 PE=1 SV=1
Q9BWM7	SFXN3	Sideroflexin-3	-1.05818	-0.14496	-0.530486		31.124	12.556	37	43	11	8	11	8	75405000	123090000	328220000	368360000	47.1	>sp|Q9BWM7|SFXN3_HUMAN Sideroflexin-3 OS=Homo sapiens GN=SFXN3 PE=1 SV=2
P09001	MRPL3	39S ribosomal protein L3, mitochondrial	-0.693766	-0.383718	-0.530429		33.443	29.994	22	24	7	6	7	6	37586000	50550000	78102000	112870000	32.8	>sp|P09001|RM03_HUMAN 39S ribosomal protein L3, mitochondrial OS=Homo sapiens GN=MRPL3 PE=1 SV=1
P54886	ALDH18A1	Delta-1-pyrroline-5-carboxylate synthase	-1.03337	-0.158079	-0.530338		34.817	27.676	307	292	37	38	37	38	1133800000	1974800000	5284000000	6882600000	57.6	>sp|P54886|P5CS_HUMAN Delta-1-pyrroline-5-carboxylate synthase OS=Homo sapiens GN=ALDH18A1 PE=1 SV=2
Q9H6R0	DHX33	Putative ATP-dependent RNA helicase DHX33	-0.734916	-0.35095	-0.530196		14.326	14.624	6	13	4	7	4	7	2588200	3567400	32207000	44949000	18.8	>sp|Q9H6R0|DHX33_HUMAN Putative ATP-dependent RNA helicase DHX33 OS=Homo sapiens GN=DHX33 PE=1 SV=2
Q8IXI2	RHOT1	Mitochondrial Rho GTPase 1	-0.815658	-0.291957	-0.530174		55.099	2.6515	8	4	4	2	4	2	2807000	3622500	2710000	2871600	13.4	>sp|Q8IXI2|MIRO1_HUMAN Mitochondrial Rho GTPase 1 OS=Homo sapiens GN=RHOT1 PE=1 SV=2
Q12769	NUP160	Nuclear pore complex protein Nup160	-0.714663	-0.365357	-0.529464		26.249	20.273	105	79	27	22	27	22	76423000	119410000	249730000	333450000	33.5	>sp|Q12769|NU160_HUMAN Nuclear pore complex protein Nup160 OS=Homo sapiens GN=NUP160 PE=1 SV=3
Q15629	TRAM1	Translocating chain-associated membrane protein 1	-0.655077	-0.413486	-0.52923		23.324	25.358	30	29	5	5	5	5	47546000	65923000	204460000	281250000	17.4	>sp|Q15629|TRAM1_HUMAN Translocating chain-associated membrane protein 1 OS=Homo sapiens GN=TRAM1 PE=1 SV=3
Q53EU6	AGPAT9	Glycerol-3-phosphate acyltransferase 3	-0.794852	-0.304861	-0.529154		17.679	22.939	4	6	2	4	2	4	1746800	3658700	15141000	23118000	24.2	>sp|Q53EU6|GPAT3_HUMAN Glycerol-3-phosphate acyltransferase 3 OS=Homo sapiens GN=AGPAT9 PE=1 SV=2
Q7Z2K6	ERMP1	Endoplasmic reticulum metallopeptidase 1	-0.852079	-0.262193	-0.527194		39.556	20.382	62	63	16	17	16	17	48868000	78483000	210240000	284330000	26.7	>sp|Q7Z2K6|ERMP1_HUMAN Endoplasmic reticulum metallopeptidase 1 OS=Homo sapiens GN=ERMP1 PE=1 SV=2
Q8WU76	SCFD2	Sec1 family domain-containing protein 2	-0.613155	-0.444561	-0.526397		19.62	21.49	19	13	7	5	7	5	7146800	10098000	26131000	38263000	21.2	>sp|Q8WU76|SCFD2_HUMAN Sec1 family domain-containing protein 2 OS=Homo sapiens GN=SCFD2 PE=1 SV=2
Q9NVI7	ATAD3A	ATPase family AAA domain-containing protein 3A	-0.9241	-0.213005	-0.525177		34.91	16.788	67	98	11	9	9	7	247800000	418880000	947090000	1236500000	45	>sp|Q9NVI7|ATD3A_HUMAN ATPase family AAA domain-containing protein 3A OS=Homo sapiens GN=ATAD3A PE=1 SV=2
O75691	UTP20	Small subunit processome component 20 homolog	-0.642655	-0.415434	-0.524576		76.361	19.641	40	26	15	18	15	18	26754000	17873000	40770000	56006000	11.2	>sp|O75691|UTP20_HUMAN Small subunit processome component 20 homolog OS=Homo sapiens GN=UTP20 PE=1 SV=3
A3KMH1	VWA8	von Willebrand factor A domain-containing protein 8	-0.839637	-0.265557	-0.524229		34.692	24.56	41	80	18	33	18	33	34893000	44822000	149290000	186060000	24	>sp|A3KMH1|VWA8_HUMAN von Willebrand factor A domain-containing protein 8 OS=Homo sapiens GN=VWA8 PE=1 SV=2
Q14739	LBR	Lamin-B receptor	-0.70611	-0.36233	-0.524004		25.633	19.8	108	106	13	13	13	13	251780000	331780000	1093600000	1570900000	25.5	>sp|Q14739|LBR_HUMAN Lamin-B receptor OS=Homo sapiens GN=LBR PE=1 SV=2
Q9BZE1	MRPL37	39S ribosomal protein L37, mitochondrial	-0.776188	-0.308827	-0.523664		17.261	18.768	61	50	16	15	16	15	93280000	136780000	211400000	298190000	62.4	>sp|Q9BZE1|RM37_HUMAN 39S ribosomal protein L37, mitochondrial OS=Homo sapiens GN=MRPL37 PE=1 SV=2
Q9NP92	MRPS30	28S ribosomal protein S30, mitochondrial	-0.904734	-0.222063	-0.52339		15.887	26.997	49	40	8	8	8	8	22655000	39903000	118450000	145980000	34.2	>sp|Q9NP92|RT30_HUMAN 28S ribosomal protein S30, mitochondrial OS=Homo sapiens GN=MRPS30 PE=1 SV=2
Q9NZJ7	MTCH1	Mitochondrial carrier homolog 1	-0.914565	-0.215617	-0.52317		13.32	15.041	13	4	6	2	6	2	9947700	16063000	17320000	23476000	26.7	>sp|Q9NZJ7|MTCH1_HUMAN Mitochondrial carrier homolog 1 OS=Homo sapiens GN=MTCH1 PE=1 SV=1
Q9H0R6	QRSL1	Glutamyl-tRNA(Gln) amidotransferase subunit A, mitochondrial	-0.698574	-0.365469	-0.522429		46.341	24.247	22	30	10	12	10	12	21219000	27111000	45688000	57323000	43.6	>sp|Q9H0R6|GATA_HUMAN Glutamyl-tRNA(Gln) amidotransferase subunit A, mitochondrial OS=Homo sapiens GN=QRSL1 PE=1 SV=2
P08240	SRPR	Signal recognition particle receptor subunit alpha	-0.768248	-0.312433	-0.522413		27.964	23.909	108	114	21	23	21	23	151360000	228650000	621790000	883460000	48	>sp|P08240|SRPR_HUMAN Signal recognition particle receptor subunit alpha OS=Homo sapiens GN=SRPR PE=1 SV=2
Q9NWU1	OXSM	3-oxoacyl-[acyl-carrier-protein] synthase, mitochondrial	-0.682304	-0.378401	-0.522365		35.131	14.477	46	45	9	9	9	9	58505000	86561000	174610000	260710000	42.7	>sp|Q9NWU1|OXSM_HUMAN 3-oxoacyl-[acyl-carrier-protein] synthase, mitochondrial OS=Homo sapiens GN=OXSM PE=1 SV=1
Q14254	FLOT2	Flotillin-2	-0.59684	-0.450274	-0.521697		21.03	35.36	57	80	17	19	17	19	133180000	168290000	423340000	666590000	53.3	>sp|Q14254|FLOT2_HUMAN Flotillin-2 OS=Homo sapiens GN=FLOT2 PE=1 SV=2
O60762	DPM1	Dolichol-phosphate mannosyltransferase	-0.710966	-0.354226	-0.521598		54.547	46.153	35	45	10	10	10	10	133000000	183910000	452360000	646370000	42.3	>sp|O60762|DPM1_HUMAN Dolichol-phosphate mannosyltransferase OS=Homo sapiens GN=DPM1 PE=1 SV=1
Q9Y548	YIPF1	Protein YIPF1	-0.717298	-0.348459	-0.521123		31.089	12.378	8	6	2	2	2	2	4748400	6757000	12788000	15443000	11.4	>sp|Q9Y548|YIPF1_HUMAN Protein YIPF1 OS=Homo sapiens GN=YIPF1 PE=2 SV=1
Q92621	NUP205	Nuclear pore complex protein Nup205	-0.69635	-0.364797	-0.52107		24.757	20.836	213	146	50	42	50	42	191520000	263300000	659370000	921400000	36.6	>sp|Q92621|NU205_HUMAN Nuclear pore complex protein Nup205 OS=Homo sapiens GN=NUP205 PE=1 SV=3
Q8WUY8	NAT14	N-acetyltransferase 14	-0.604925	-0.439783	-0.519992		13.807	33.101	15	20	4	5	4	5	19401000	25933000	39032000	54877000	26.7	>sp|Q8WUY8|NAT14_HUMAN N-acetyltransferase 14 OS=Homo sapiens GN=NAT14 PE=1 SV=1
Q9NTJ5	SACM1L	Phosphatidylinositide phosphatase SAC1	-0.735609	-0.329296	-0.518195		19.675	18.328	76	97	21	18	21	18	118850000	175100000	461880000	649650000	48.6	>sp|Q9NTJ5|SAC1_HUMAN Phosphatidylinositide phosphatase SAC1 OS=Homo sapiens GN=SACM1L PE=1 SV=2
Q9NP80	PNPLA8	Calcium-independent phospholipase A2-gamma	-0.726308	-0.334454	-0.517118		38.679	11.175	4	5	2	2	2	2	937620	1349400	20658000	30401000	5	>sp|Q9NP80|PLPL8_HUMAN Calcium-independent phospholipase A2-gamma OS=Homo sapiens GN=PNPLA8 PE=1 SV=1
P57088	TMEM33	Transmembrane protein 33	-0.808344	-0.274053	-0.516605		77.406	19.467	16	20	4	4	4	4	69280000	107220000	322150000	368340000	17.8	>sp|P57088|TMM33_HUMAN Transmembrane protein 33 OS=Homo sapiens GN=TMEM33 PE=1 SV=2
Q9HBR0	SLC38A10	Putative sodium-coupled neutral amino acid transporter 10	-0.745883	-0.317767	-0.516003		45.017	20.711	9	22	6	8	6	8	4546800	8646600	39626000	59116000	13.3	>sp|Q9HBR0|S38AA_HUMAN Putative sodium-coupled neutral amino acid transporter 10 OS=Homo sapiens GN=SLC38A10 PE=1 SV=2
Q96N66	MBOAT7	Lysophospholipid acyltransferase 7	-0.879392	-0.225645	-0.515801		7.6507	10.765	9	14	3	4	3	4	25136000	39215000	93413000	131700000	11.2	>sp|Q96N66|MBOA7_HUMAN Lysophospholipid acyltransferase 7 OS=Homo sapiens GN=MBOAT7 PE=1 SV=2
Q8IY26	PPAPDC2	Presqualene diphosphate phosphatase	-0.60739	-0.428893	-0.515382		93.942	39.014	3	8	2	3	2	3	3277600	2651000	13926000	21242000	11.2	>sp|Q8IY26|PPAC2_HUMAN Presqualene diphosphate phosphatase OS=Homo sapiens GN=PPAPDC2 PE=1 SV=3
O15126	SCAMP1	Secretory carrier-associated membrane protein 1	-0.264957	-0.818442	-0.515317		23.549	40.332	13	3	5	5	5	5	27612000	26767000	20032000	32135000	29.6	>sp|O15126|SCAM1_HUMAN Secretory carrier-associated membrane protein 1 OS=Homo sapiens GN=SCAMP1 PE=1 SV=2
Q9H7Z7	PTGES2	Prostaglandin E synthase 2	-0.55562	-0.475396	-0.51495		30.484	13.22	96	70	17	14	17	14	348590000	576050000	631860000	1172200000	55.4	>sp|Q9H7Z7|PGES2_HUMAN Prostaglandin E synthase 2 OS=Homo sapiens GN=PTGES2 PE=1 SV=1
O75648	TRMU	Mitochondrial tRNA-specific 2-thiouridylase 1	-0.484086	-0.546265	-0.514841		56.713	18.21	6	10	4	5	4	5	6195900	8119600	22665000	41421000	21.9	>sp|O75648|MTU1_HUMAN Mitochondrial tRNA-specific 2-thiouridylase 1 OS=Homo sapiens GN=TRMU PE=1 SV=2
O14880	MGST3	Microsomal glutathione S-transferase 3	-0.821547	-0.261952	-0.514786		29.192	23.226	78	38	4	4	4	4	469460000	771060000	575220000	786180000	25.7	>sp|O14880|MGST3_HUMAN Microsomal glutathione S-transferase 3 OS=Homo sapiens GN=MGST3 PE=1 SV=1
Q12788	TBL3	Transducin beta-like protein 3	-0.823505	-0.260026	-0.514428		49.044	25.812	45	92	16	22	16	22	46585000	71488000	310480000	409100000	45.7	>sp|Q12788|TBL3_HUMAN Transducin beta-like protein 3 OS=Homo sapiens GN=TBL3 PE=1 SV=2
Q92887	ABCC2	Canalicular multispecific organic anion transporter 1	-0.695549	-0.352646	-0.513933		17.234	26.147	23	15	9	8	8	7	15094000	21427000	24669000	40945000	11.7	>sp|Q92887|MRP2_HUMAN Canalicular multispecific organic anion transporter 1 OS=Homo sapiens GN=ABCC2 PE=1 SV=3
Q53H12	AGK	Acylglycerol kinase, mitochondrial	-0.682214	-0.363003	-0.513798		29.583	19.004	52	63	13	13	13	13	146330000	202460000	448760000	648280000	57.3	>sp|Q53H12|AGK_HUMAN Acylglycerol kinase, mitochondrial OS=Homo sapiens GN=AGK PE=1 SV=2
P67812	SEC11A	Signal peptidase complex catalytic subunit SEC11A	-0.830904	-0.252537	-0.51293		15.458	12.134	28	27	5	5	5	5	45443000	69415000	317420000	456060000	35.2	>sp|P67812|SC11A_HUMAN Signal peptidase complex catalytic subunit SEC11A OS=Homo sapiens GN=SEC11A PE=1 SV=1
Q15035	TRAM2	Translocating chain-associated membrane protein 2	-0.866077	-0.229096	-0.512713		44.486	45.803	4	4	2	2	2	2	2491400	2226000	7628800	8249800	10	>sp|Q15035|TRAM2_HUMAN Translocating chain-associated membrane protein 2 OS=Homo sapiens GN=TRAM2 PE=1 SV=1
Q9Y3T9	NOC2L	Nucleolar complex protein 2 homolog	-0.813443	-0.262794	-0.512005		25.746	33.963	28	45	11	11	11	11	39286000	57442000	246060000	321520000	15.5	>sp|Q9Y3T9|NOC2L_HUMAN Nucleolar complex protein 2 homolog OS=Homo sapiens GN=NOC2L PE=1 SV=4
Q9H857	NT5DC2	5-nucleotidase domain-containing protein 2	-1.08658	-0.101247	-0.511379		21.303	17.777	6	15	4	8	4	8	2982700	4879300	42397000	35170000	25	>sp|Q9H857|NT5D2_HUMAN 5-nucleotidase domain-containing protein 2 OS=Homo sapiens GN=NT5DC2 PE=1 SV=1
Q14728	MFSD10	Major facilitator superfamily domain-containing protein 10	-0.780562	-0.28404	-0.511045		21.147	15.468	32	40	6	5	6	5	21914000	32827000	137820000	180140000	23.1	>sp|Q14728|MFS10_HUMAN Major facilitator superfamily domain-containing protein 10 OS=Homo sapiens GN=MFSD10 PE=2 SV=1
Q9HBL7	PLGRKT	Plasminogen receptor (KT)	-0.547351	-0.47415	-0.510286		38.305	15.235	10	9	3	3	3	3	6023400	7986500	31449000	49501000	21.8	>sp|Q9HBL7|PLRKT_HUMAN Plasminogen receptor (KT) OS=Homo sapiens GN=PLGRKT PE=1 SV=1
Q96BI1	SLC22A18	Solute carrier family 22 member 18	-0.805623	-0.264356	-0.509753		29.725	11.102	21	10	6	4	6	4	12182000	17409000	19371000	22567000	20	>sp|Q96BI1|S22AI_HUMAN Solute carrier family 22 member 18 OS=Homo sapiens GN=SLC22A18 PE=1 SV=3
Q6NUK1	SLC25A24	Calcium-binding mitochondrial carrier protein SCaMC-1	-0.807025	-0.261711	-0.508755		34.095	20.492	142	125	21	23	21	23	292360000	436710000	1312800000	1704600000	55.3	>sp|Q6NUK1|SCMC1_HUMAN Calcium-binding mitochondrial carrier protein SCaMC-1 OS=Homo sapiens GN=SLC25A24 PE=1 SV=2
Q9BQG0	MYBBP1A	Myb-binding protein 1A	-0.73266	-0.314174	-0.508296		28.671	20.752	256	190	37	36	37	36	356520000	511800000	1116500000	1535800000	41.3	>sp|Q9BQG0|MBB1A_HUMAN Myb-binding protein 1A OS=Homo sapiens GN=MYBBP1A PE=1 SV=2
Q9HD20	ATP13A1	Probable cation-transporting ATPase 13A1	-0.813525	-0.25544	-0.507663		30.731	23.159	95	86	32	25	32	25	206810000	286110000	700880000	907740000	38.4	>sp|Q9HD20|AT131_HUMAN Probable cation-transporting ATPase 13A1 OS=Homo sapiens GN=ATP13A1 PE=1 SV=2
P43304	GPD2	Glycerol-3-phosphate dehydrogenase, mitochondrial	-0.865523	-0.218967	-0.506324		26.753	23.476	202	192	35	33	35	33	384740000	623640000	1518900000	1929300000	65.1	>sp|P43304|GPDM_HUMAN Glycerol-3-phosphate dehydrogenase, mitochondrial OS=Homo sapiens GN=GPD2 PE=1 SV=3
Q969S9	GFM2	Ribosome-releasing factor 2, mitochondrial	-0.875623	-0.212383	-0.50622		16.335	19.254	23	30	6	8	6	8	6234400	10256000	34598000	44717000	21.2	>sp|Q969S9|RRF2M_HUMAN Ribosome-releasing factor 2, mitochondrial OS=Homo sapiens GN=GFM2 PE=1 SV=1
Q8NHP6	MOSPD2	Motile sperm domain-containing protein 2	-0.697685	-0.336512	-0.505826		19.017	64.353	13	13	6	6	6	6	10452000	16760000	30301000	35837000	23.9	>sp|Q8NHP6|MSPD2_HUMAN Motile sperm domain-containing protein 2 OS=Homo sapiens GN=MOSPD2 PE=1 SV=1
Q9NVA1	UQCC	Ubiquinol-cytochrome c reductase complex chaperone CBP3 homolog	-0.811553	-0.249749	-0.503475		21.874	17.671	13	15	4	5	4	5	26055000	40059000	64477000	79553000	19.1	>sp|Q9NVA1|UQCC_HUMAN Ubiquinol-cytochrome c reductase complex chaperone CBP3 homolog OS=Homo sapiens GN=UQCC PE=1 SV=3
Q969V3	NCLN	Nicalin	-0.719753	-0.312781	-0.501964		28.041	48.142	72	103	17	18	17	18	172000000	240180000	749130000	985960000	40.5	>sp|Q969V3|NCLN_HUMAN Nicalin OS=Homo sapiens GN=NCLN PE=1 SV=2
Q9Y2H6	FNDC3A	Fibronectin type-III domain-containing protein 3A	-0.739934	-0.296428	-0.501205		19.591	23.788	62	36	18	14	18	14	52786000	74263000	73840000	86248000	30.4	>sp|Q9Y2H6|FND3A_HUMAN Fibronectin type-III domain-containing protein 3A OS=Homo sapiens GN=FNDC3A PE=1 SV=4
P42765	ACAA2	3-ketoacyl-CoA thiolase, mitochondrial	-0.623024	-0.386811	-0.500089		19.837	21.07	337	301	21	23	21	23	1158600000	1609000000	3289500000	4558200000	83.4	>sp|P42765|THIM_HUMAN 3-ketoacyl-CoA thiolase, mitochondrial OS=Homo sapiens GN=ACAA2 PE=1 SV=2
Q8NBU5	ATAD1	ATPase family AAA domain-containing protein 1	-0.665575	-0.351515	-0.500016		20.636	16.865	28	31	10	12	10	12	27174000	36570000	74167000	102050000	49.6	>sp|Q8NBU5|ATAD1_HUMAN ATPase family AAA domain-containing protein 1 OS=Homo sapiens GN=ATAD1 PE=1 SV=1
O15228	GNPAT	Dihydroxyacetone phosphate acyltransferase	-0.94703	-0.15782	-0.499119		23.387	17.383	122	150	25	22	25	22	215030000	361490000	1029100000	1243000000	48.4	>sp|O15228|GNPAT_HUMAN Dihydroxyacetone phosphate acyltransferase OS=Homo sapiens GN=GNPAT PE=1 SV=1
Q5VST6	ABHD17B	Alpha/beta hydrolase domain-containing protein 17B	-0.449746	-0.548437	-0.498248		23.737	17.026	26	11	9	4	9	4	31380000	36464000	29771000	46772000	52.1	>sp|Q5VST6|AB17B_HUMAN Alpha/beta hydrolase domain-containing protein 17B OS=Homo sapiens GN=ABHD17B PE=2 SV=1
Q6NUQ1	RINT1	RAD50-interacting protein 1	-0.508226	-0.487589	-0.497871		16.136	16.775	9	11	6	7	6	7	12479000	14838000	32821000	51073000	16.3	>sp|Q6NUQ1|RINT1_HUMAN RAD50-interacting protein 1 OS=Homo sapiens GN=RINT1 PE=1 SV=1
Q9NVV5	AIG1	Androgen-induced gene 1 protein	-0.64441	-0.360533	-0.4955		20.094	16.802	6	15	3	2	3	2	4784300	6939300	48656000	82790000	13.5	>sp|Q9NVV5|AIG1_HUMAN Androgen-induced gene 1 protein OS=Homo sapiens GN=AIG1 PE=1 SV=2
Q15061	WDR43	WD repeat-containing protein 43	-0.77543	-0.259664	-0.49462		19.158	16.286	43	18	15	10	15	10	60013000	97279000	106710000	141120000	37.1	>sp|Q15061|WDR43_HUMAN WD repeat-containing protein 43 OS=Homo sapiens GN=WDR43 PE=1 SV=3
Q14315	FLNC	Filamin-C	-0.797511	-0.2444	-0.494609		14.725	45.646	6	4	3	3	3	3	1295900	2066900	10202000	13357000	9.2	>sp|Q14315|FLNC_HUMAN Filamin-C OS=Homo sapiens GN=FLNC PE=1 SV=3
Q8N1F8	STK11IP	Serine/threonine-protein kinase 11-interacting protein	-0.673828	-0.334225	-0.494057		42.706	25.588	3	13	3	8	3	8	2820300	1893800	19469000	29886000	9.6	>sp|Q8N1F8|S11IP_HUMAN Serine/threonine-protein kinase 11-interacting protein OS=Homo sapiens GN=STK11IP PE=1 SV=3
O94886	TMEM63A	Transmembrane protein 63A	-0.762221	-0.267596	-0.493814		94.093	20.91	7	8	4	3	4	3	5373400	6691300	19778000	22720000	8.8	>sp|O94886|TM63A_HUMAN Transmembrane protein 63A OS=Homo sapiens GN=TMEM63A PE=2 SV=3
Q8IYQ7	THNSL1	Threonine synthase-like 1	-0.719578	-0.298541	-0.493754		31.905	22.342	33	39	17	16	17	16	38256000	52949000	131530000	164380000	38.6	>sp|Q8IYQ7|THNS1_HUMAN Threonine synthase-like 1 OS=Homo sapiens GN=THNSL1 PE=1 SV=2
P07099	EPHX1	Epoxide hydrolase 1	-0.751635	-0.273814	-0.493033		28.32	24.22	186	196	21	19	21	19	1205500000	1780700000	3574800000	5021600000	54.5	>sp|P07099|HYEP_HUMAN Epoxide hydrolase 1 OS=Homo sapiens GN=EPHX1 PE=1 SV=1
Q7Z2W9	MRPL21	39S ribosomal protein L21, mitochondrial	-0.502738	-0.483158	-0.492915		23.708	23.32	7	13	5	5	5	5	5025700	7789200	26854000	44690000	37.1	>sp|Q7Z2W9|RM21_HUMAN 39S ribosomal protein L21, mitochondrial OS=Homo sapiens GN=MRPL21 PE=1 SV=2
P23368	ME2	NAD-dependent malic enzyme, mitochondrial	-0.650121	-0.349139	-0.491795		32.699	15.346	140	116	26	23	26	23	315930000	391730000	1090000000	1446600000	62.8	>sp|P23368|MAOM_HUMAN NAD-dependent malic enzyme, mitochondrial OS=Homo sapiens GN=ME2 PE=1 SV=1
P05165	PCCA	Propionyl-CoA carboxylase alpha chain, mitochondrial	-0.955164	-0.14104	-0.491421		25.948	17.276	8	22	5	10	5	10	7084400	12781000	56409000	64688000	19.8	>sp|P05165|PCCA_HUMAN Propionyl-CoA carboxylase alpha chain, mitochondrial OS=Homo sapiens GN=PCCA PE=1 SV=4
Q5JTH9	RRP12	RRP12-like protein	-0.737168	-0.280006	-0.490554		37.61	19.556	82	85	26	23	26	23	77215000	111780000	286900000	340610000	33	>sp|Q5JTH9|RRP12_HUMAN RRP12-like protein OS=Homo sapiens GN=RRP12 PE=1 SV=2
P31431	SDC4	Syndecan-4	-0.653702	-0.343465	-0.49026		28.468	30.851	8	6	4	4	4	4	16620000	20615000	13683000	17469000	26.8	>sp|P31431|SDC4_HUMAN Syndecan-4 OS=Homo sapiens GN=SDC4 PE=1 SV=2
Q9NX47	MAR5	E3 ubiquitin-protein ligase MARCH5	-0.806613	-0.230572	-0.490031		16.088	23.662	17	19	6	5	6	5	15976000	24681000	72506000	80339000	30.6	>sp|Q9NX47|MARH5_HUMAN E3 ubiquitin-protein ligase MARCH5 OS=Homo sapiens GN=MARCH5 PE=1 SV=1
O00515	LAD1	Ladinin-1	-0.449429	-0.531269	-0.489769		22.715	14.835	43	38	13	12	13	12	76558000	70448000	124660000	191000000	39.3	>sp|O00515|LAD1_HUMAN Ladinin-1 OS=Homo sapiens GN=LAD1 PE=1 SV=2
O60637	TSPAN3	Tetraspanin-3	-0.364573	-0.626486	-0.489594		9.5094	14.983	3	4	2	2	2	2	3849700	3568900	10383000	14557000	6.3	>sp|O60637|TSN3_HUMAN Tetraspanin-3 OS=Homo sapiens GN=TSPAN3 PE=2 SV=1
Q9Y2X3	NOP58	Nucleolar protein 58	-0.687061	-0.315218	-0.489193		19.675	16.99	165	182	25	20	25	20	509930000	674900000	1883400000	2463800000	56.7	>sp|Q9Y2X3|NOP58_HUMAN Nucleolar protein 58 OS=Homo sapiens GN=NOP58 PE=1 SV=1
Q5H8A4	PIGG	GPI ethanolamine phosphate transferase 2	-0.946506	-0.142087	-0.488942		34.136	21.002	5	6	2	2	2	2	1040500	1507400	9255400	10125000	4.1	>sp|Q5H8A4|PIGG_HUMAN GPI ethanolamine phosphate transferase 2 OS=Homo sapiens GN=PIGG PE=1 SV=1
Q9BYD6	MRPL1	39S ribosomal protein L1, mitochondrial	-0.62826	-0.360533	-0.488195		38.226	17.541	63	65	11	12	11	12	86565000	113760000	216080000	330150000	42.8	>sp|Q9BYD6|RM01_HUMAN 39S ribosomal protein L1, mitochondrial OS=Homo sapiens GN=MRPL1 PE=1 SV=2
Q9BVI4	NOC4L	Nucleolar complex protein 4 homolog	-0.482332	-0.493545	-0.487928		19.763	21.443	34	36	10	10	10	10	19827000	23439000	89697000	136300000	39.9	>sp|Q9BVI4|NOC4L_HUMAN Nucleolar complex protein 4 homolog OS=Homo sapiens GN=NOC4L PE=1 SV=1
O00161	SNAP23	Synaptosomal-associated protein 23	-0.0990932	-1.02112	-0.48767		17.265	31.91	63	49	10	12	10	12	220620000	205140000	249050000	520000000	73.5	>sp|O00161|SNP23_HUMAN Synaptosomal-associated protein 23 OS=Homo sapiens GN=SNAP23 PE=1 SV=1
Q9H2V7	SPNS1	Protein spinster homolog 1	-0.727877	-0.281787	-0.487659		20.459	23.785	16	25	4	6	4	6	10991000	14435000	100070000	131580000	21.2	>sp|Q9H2V7|SPNS1_HUMAN Protein spinster homolog 1 OS=Homo sapiens GN=SPNS1 PE=1 SV=1
Q8IYS2	KIAA2013	Uncharacterized protein KIAA2013	-0.894372	-0.170438	-0.487465		26.378	34.91	36	18	7	4	7	4	31554000	57897000	112840000	149140000	17	>sp|Q8IYS2|K2013_HUMAN Uncharacterized protein KIAA2013 OS=Homo sapiens GN=KIAA2013 PE=2 SV=1
Q8N1F7	NUP93	Nuclear pore complex protein Nup93	-0.689299	-0.31034	-0.487412		20.809	28.274	177	190	33	34	33	34	369500000	538970000	1182000000	1611800000	57.1	>sp|Q8N1F7|NUP93_HUMAN Nuclear pore complex protein Nup93 OS=Homo sapiens GN=NUP93 PE=1 SV=2
Q96S66	CLCC1	Chloride channel CLIC-like protein 1	-0.74442	-0.268554	-0.486955		29.541	24.284	52	72	15	16	15	16	82590000	120740000	340230000	443750000	42.5	>sp|Q96S66|CLCC1_HUMAN Chloride channel CLIC-like protein 1 OS=Homo sapiens GN=CLCC1 PE=1 SV=1
O14925	TIMM23	Mitochondrial import inner membrane translocase subunit Tim23	-0.720016	-0.28629	-0.486915		35.236	12.758	17	27	6	6	6	6	38247000	57224000	121020000	158360000	63.2	>sp|O14925|TIM23_HUMAN Mitochondrial import inner membrane translocase subunit Tim23 OS=Homo sapiens GN=TIMM23 PE=1 SV=1;>sp|Q5SRD1|TI23B_HUMAN Putative mitochondrial import inner membrane translocase subunit Tim23B OS=Homo sapiens GN=TIMM23B PE=5 SV=2
Q99805	TM9SF2	Transmembrane 9 superfamily member 2	-0.685536	-0.311968	-0.486694		22.975	16.752	73	80	10	9	10	9	112320000	154940000	356600000	473570000	21.4	>sp|Q99805|TM9S2_HUMAN Transmembrane 9 superfamily member 2 OS=Homo sapiens GN=TM9SF2 PE=1 SV=1
O60725	ICMT	Protein-S-isoprenylcysteine O-methyltransferase	-0.68446	-0.312665	-0.486619		39.822	11.098	20	6	3	3	3	3	20794000	28725000	33506000	41795000	15.1	>sp|O60725|ICMT_HUMAN Protein-S-isoprenylcysteine O-methyltransferase OS=Homo sapiens GN=ICMT PE=1 SV=1
Q9P275	USP36	Ubiquitin carboxyl-terminal hydrolase 36	-0.768502	-0.249627	-0.485862		37.754	30.471	4	15	2	5	2	5	2807900	3714000	27199000	39311000	5.4	>sp|Q9P275|UBP36_HUMAN Ubiquitin carboxyl-terminal hydrolase 36 OS=Homo sapiens GN=USP36 PE=1 SV=3
Q969N2	PIGT	GPI transamidase component PIG-T	-0.744592	-0.266517	-0.485841		20.524	17.225	35	33	11	7	11	7	59434000	89308000	159700000	217190000	23.7	>sp|Q969N2|PIGT_HUMAN GPI transamidase component PIG-T OS=Homo sapiens GN=PIGT PE=1 SV=1
O94874	UFL1	E3 UFM1-protein ligase 1	-0.673918	-0.319387	-0.485789		23.001	24.042	139	107	30	27	30	27	141030000	182880000	546910000	729500000	49.7	>sp|O94874|UFL1_HUMAN E3 UFM1-protein ligase 1 OS=Homo sapiens GN=UFL1 PE=1 SV=2
Q12931	TRAP1	Heat shock protein 75 kDa, mitochondrial	-0.834064	-0.205017	-0.485524		30.029	22.645	159	200	23	25	23	25	402710000	631260000	2068700000	2585200000	51.4	>sp|Q12931|TRAP1_HUMAN Heat shock protein 75 kDa, mitochondrial OS=Homo sapiens GN=TRAP1 PE=1 SV=3
Q9H330	TMEM245	Transmembrane protein 245	-0.880646	-0.175557	-0.485448		12.43	13.747	24	14	4	4	4	4	16292000	28025000	32926000	37414000	8.3	>sp|Q9H330|TM245_HUMAN Transmembrane protein 245 OS=Homo sapiens GN=TMEM245 PE=1 SV=2
Q6YN16	HSDL2	Hydroxysteroid dehydrogenase-like protein 2	-0.756169	-0.256528	-0.484826		22.592	24.115	182	190	24	27	24	27	600990000	889740000	1858700000	2441300000	76.3	>sp|Q6YN16|HSDL2_HUMAN Hydroxysteroid dehydrogenase-like protein 2 OS=Homo sapiens GN=HSDL2 PE=1 SV=1
Q5JRX3	PITRM1	Presequence protease, mitochondrial	-0.691445	-0.302173	-0.483719		24.087	17.523	177	150	32	28	32	28	331140000	484080000	877400000	1167200000	50.6	>sp|Q5JRX3|PREP_HUMAN Presequence protease, mitochondrial OS=Homo sapiens GN=PITRM1 PE=1 SV=3
Q6JQN1	ACAD10	Acyl-CoA dehydrogenase family member 10	-0.720454	-0.278461	-0.482596		22.66	15.033	34	42	13	17	13	17	16315000	21334000	81718000	99601000	31.4	>sp|Q6JQN1|ACD10_HUMAN Acyl-CoA dehydrogenase family member 10 OS=Homo sapiens GN=ACAD10 PE=2 SV=1
Q8N2K0	ABHD12	Monoacylglycerol lipase ABHD12	-0.758047	-0.251083	-0.48241		54.855	18.011	72	64	15	13	15	13	136060000	195220000	414650000	571330000	50	>sp|Q8N2K0|ABD12_HUMAN Monoacylglycerol lipase ABHD12 OS=Homo sapiens GN=ABHD12 PE=1 SV=2
O43402	EMC8	ER membrane protein complex subunit 8	-0.444137	-0.521252	-0.482179		9.4203	17.418	18	14	7	6	7	6	52483000	59525000	64356000	88657000	44.3	>sp|O43402|EMC8_HUMAN ER membrane protein complex subunit 8 OS=Homo sapiens GN=EMC8 PE=1 SV=1
Q9NW13	RBM28	RNA-binding protein 28	-0.674551	-0.3122	-0.482029		18.025	17.276	59	65	17	18	17	18	66134000	87951000	248990000	298510000	30.4	>sp|Q9NW13|RBM28_HUMAN RNA-binding protein 28 OS=Homo sapiens GN=RBM28 PE=1 SV=3
Q8NBN3	TMEM87A	Transmembrane protein 87A	-0.667029	-0.317536	-0.481725		17.939	15.711	15	10	5	6	5	6	10575000	15431000	28297000	33193000	18.9	>sp|Q8NBN3|TM87A_HUMAN Transmembrane protein 87A OS=Homo sapiens GN=TMEM87A PE=1 SV=3
O14653	GOSR2	Golgi SNAP receptor complex member 2	-0.602077	-0.370276	-0.481526		15.117	16.2	25	16	7	6	7	6	33648000	45155000	87938000	130660000	53.3	>sp|O14653|GOSR2_HUMAN Golgi SNAP receptor complex member 2 OS=Homo sapiens GN=GOSR2 PE=1 SV=2
Q15006	EMC2	ER membrane protein complex subunit 2	-0.587749	-0.379399	-0.479816		14.102	23.191	32	41	10	7	10	7	62928000	83554000	170930000	258260000	46.1	>sp|Q15006|EMC2_HUMAN ER membrane protein complex subunit 2 OS=Homo sapiens GN=EMC2 PE=1 SV=1
Q9BW60	ELOVL1	Elongation of very long chain fatty acids protein 1	-0.851839	-0.184217	-0.479749		12.457	13.309	6	7	3	3	3	3	14393000	23208000	58060000	78472000	14	>sp|Q9BW60|ELOV1_HUMAN Elongation of very long chain fatty acids protein 1 OS=Homo sapiens GN=ELOVL1 PE=1 SV=1
Q7Z7M9	GALNT5	Polypeptide N-acetylgalactosaminyltransferase 5	-0.803475	-0.215492	-0.479734		39.66	37.027	4	3	2	3	2	3	1489300	2260300	1298900	1846800	6.5	>sp|Q7Z7M9|GALT5_HUMAN Polypeptide N-acetylgalactosaminyltransferase 5 OS=Homo sapiens GN=GALNT5 PE=1 SV=1
Q6ZXV5	TMTC3	Transmembrane and TPR repeat-containing protein 3	-0.698663	-0.289598	-0.479681		27.919	18.097	31	37	11	14	11	14	34284000	47255000	190320000	233140000	21.5	>sp|Q6ZXV5|TMTC3_HUMAN Transmembrane and TPR repeat-containing protein 3 OS=Homo sapiens GN=TMTC3 PE=1 SV=2
Q8TEM1	NUP210	Nuclear pore membrane glycoprotein 210	-0.79693	-0.218471	-0.478901		25.797	19.608	136	129	31	33	31	33	277070000	390580000	791970000	1039400000	28.8	>sp|Q8TEM1|PO210_HUMAN Nuclear pore membrane glycoprotein 210 OS=Homo sapiens GN=NUP210 PE=1 SV=3
P16219	ACADS	Short-chain specific acyl-CoA dehydrogenase, mitochondrial	-0.629287	-0.341189	-0.478058		24.159	38.109	12	27	7	9	7	9	8179500	13826000	83623000	108070000	35.2	>sp|P16219|ACADS_HUMAN Short-chain specific acyl-CoA dehydrogenase, mitochondrial OS=Homo sapiens GN=ACADS PE=1 SV=1
Q8NCN5	PDPR	Pyruvate dehydrogenase phosphatase regulatory subunit, mitochondrial	-0.923111	-0.136716	-0.476982		37.499	23.42	30	41	14	14	14	14	20878000	31181000	105660000	124530000	28.7	>sp|Q8NCN5|PDPR_HUMAN Pyruvate dehydrogenase phosphatase regulatory subunit, mitochondrial OS=Homo sapiens GN=PDPR PE=1 SV=2
Q9NVH2	INTS7	Integrator complex subunit 7	-0.531968	-0.423955	-0.476951		57.838	15.536	2	5	2	5	2	5	1626600	1263300	26282000	20157000	11	>sp|Q9NVH2|INT7_HUMAN Integrator complex subunit 7 OS=Homo sapiens GN=INTS7 PE=1 SV=1
P51398	DAP3	28S ribosomal protein S29, mitochondrial	-0.669208	-0.306845	-0.47668		22.418	17.218	102	85	17	11	17	11	136670000	191310000	451010000	625210000	50.8	>sp|P51398|RT29_HUMAN 28S ribosomal protein S29, mitochondrial OS=Homo sapiens GN=DAP3 PE=1 SV=1
Q9UP95	SLC12A4	Solute carrier family 12 member 4	-0.557484	-0.399663	-0.476417		24.514	46.92	18	16	8	7	5	5	10270000	13887000	23195000	34609000	11.3	>sp|Q9UP95|S12A4_HUMAN Solute carrier family 12 member 4 OS=Homo sapiens GN=SLC12A4 PE=1 SV=2
Q10713	PMPCA	Mitochondrial-processing peptidase subunit alpha	-0.66821	-0.306962	-0.476309		22.723	21.633	106	92	23	19	23	19	475970000	648500000	1258400000	1735300000	53.1	>sp|Q10713|MPPA_HUMAN Mitochondrial-processing peptidase subunit alpha OS=Homo sapiens GN=PMPCA PE=1 SV=2
Q9H9B4	SFXN1	Sideroflexin-1	-0.936515	-0.126048	-0.475102		18.516	31.984	90	107	9	8	9	8	255980000	417620000	1785300000	1692900000	37	>sp|Q9H9B4|SFXN1_HUMAN Sideroflexin-1 OS=Homo sapiens GN=SFXN1 PE=1 SV=4
Q86WC4	OSTM1	Osteopetrosis-associated transmembrane protein 1	-0.305795	-0.665575	-0.474499		10.541	32.709	14	3	2	2	2	2	12061000	12671000	2975100	6306000	7.8	>sp|Q86WC4|OSTM1_HUMAN Osteopetrosis-associated transmembrane protein 1 OS=Homo sapiens GN=OSTM1 PE=1 SV=1
Q99943	AGPAT1	1-acyl-sn-glycerol-3-phosphate acyltransferase alpha	-0.640899	-0.323428	-0.473448		30.604	18.622	22	28	3	4	3	4	17713000	23026000	41488000	54500000	21.6	>sp|Q99943|PLCA_HUMAN 1-acyl-sn-glycerol-3-phosphate acyltransferase alpha OS=Homo sapiens GN=AGPAT1 PE=2 SV=2
O75352	MPDU1	Mannose-P-dolichol utilization defect 1 protein	-0.842697	-0.177727	-0.472234		18.17	8.352	16	10	4	2	4	2	25123000	52350000	101700000	140860000	21.1	>sp|O75352|MPU1_HUMAN Mannose-P-dolichol utilization defect 1 protein OS=Homo sapiens GN=MPDU1 PE=1 SV=2
Q9NWU5	MRPL22	39S ribosomal protein L22, mitochondrial	-0.612871	-0.34301	-0.47164		30.692	12.96	6	19	4	5	4	5	9807700	12389000	51705000	74415000	32.5	>sp|Q9NWU5|RM22_HUMAN 39S ribosomal protein L22, mitochondrial OS=Homo sapiens GN=MRPL22 PE=1 SV=1
Q9BW27	NUP85	Nuclear pore complex protein Nup85	-0.647361	-0.314755	-0.471494		35.839	19.429	63	72	16	17	16	17	83153000	75038000	193870000	274880000	38.3	>sp|Q9BW27|NUP85_HUMAN Nuclear pore complex protein Nup85 OS=Homo sapiens GN=NUP85 PE=1 SV=1
Q8TCS8	PNPT1	Polyribonucleotide nucleotidyltransferase 1, mitochondrial	-0.806365	-0.198997	-0.470952		28.307	16.845	55	64	19	20	19	20	28225000	43619000	155410000	195370000	37.7	>sp|Q8TCS8|PNPT1_HUMAN Polyribonucleotide nucleotidyltransferase 1, mitochondrial OS=Homo sapiens GN=PNPT1 PE=1 SV=2
O15260	SURF4	Surfeit locus protein 4	-0.75446	-0.232538	-0.470025		12.259	13.111	60	42	7	6	7	6	272100000	400480000	367380000	491420000	30.5	>sp|O15260|SURF4_HUMAN Surfeit locus protein 4 OS=Homo sapiens GN=SURF4 PE=1 SV=3
A4D1E9	GTPBP10	GTP-binding protein 10	-0.860208	-0.162339	-0.469481		14.584	30.051	3	8	2	4	2	4	1187300	1724400	7010000	8155000	15	>sp|A4D1E9|GTPBA_HUMAN GTP-binding protein 10 OS=Homo sapiens GN=GTPBP10 PE=1 SV=1
Q96RQ3	MCCC1	Methylcrotonoyl-CoA carboxylase subunit alpha, mitochondrial	-0.898015	-0.138421	-0.468793		54.765	19.133	50	74	15	21	15	21	65340000	92197000	284230000	361560000	46.1	>sp|Q96RQ3|MCCA_HUMAN Methylcrotonoyl-CoA carboxylase subunit alpha, mitochondrial OS=Homo sapiens GN=MCCC1 PE=1 SV=3
Q9NUQ7	UFSP2	Ufm1-specific protease 2	-0.735522	-0.243425	-0.468593		36.677	18.827	20	8	7	5	7	5	9012600	12394000	20987000	24740000	36.7	>sp|Q9NUQ7|UFSP2_HUMAN Ufm1-specific protease 2 OS=Homo sapiens GN=UFSP2 PE=2 SV=3
P61619	SEC61A1	Protein transport protein Sec61 subunit alpha isoform 1	-0.734742	-0.243425	-0.468269		24.559	15.641	39	67	10	10	5	4	182330000	276120000	1286200000	1697100000	22.5	>sp|P61619|S61A1_HUMAN Protein transport protein Sec61 subunit alpha isoform 1 OS=Homo sapiens GN=SEC61A1 PE=1 SV=2
Q4KMQ2	ANO6	Anoctamin-6	-0.559639	-0.381837	-0.468		22.53	45.598	34	22	10	10	10	10	40434000	51216000	61652000	94055000	19.6	>sp|Q4KMQ2|ANO6_HUMAN Anoctamin-6 OS=Homo sapiens GN=ANO6 PE=1 SV=2
O95857	TSPAN13	Tetraspanin-13	-0.72718	-0.247442	-0.467461		22.551	26.313	15	11	4	4	4	4	25209000	31791000	18776000	24030000	26	>sp|O95857|TSN13_HUMAN Tetraspanin-13 OS=Homo sapiens GN=TSPAN13 PE=2 SV=1
O75844	ZMPSTE24	CAAX prenyl protease 1 homolog	-0.611361	-0.335597	-0.466901		13.766	12.616	73	73	12	13	12	13	193680000	250250000	790780000	1077500000	31.8	>sp|O75844|FACE1_HUMAN CAAX prenyl protease 1 homolog OS=Homo sapiens GN=ZMPSTE24 PE=1 SV=2
Q9BV94	EDEM2	ER degradation-enhancing alpha-mannosidase-like protein 2	-0.621055	-0.327113	-0.466611		17.321	21.798	3	6	3	4	3	4	1768000	2428100	8624500	11229000	12.5	>sp|Q9BV94|EDEM2_HUMAN ER degradation-enhancing alpha-mannosidase-like protein 2 OS=Homo sapiens GN=EDEM2 PE=1 SV=2
Q8WWV3	RTN4IP1	Reticulon-4-interacting protein 1, mitochondrial	-0.494364	-0.438931	-0.466382		18.658	31.229	19	21	8	8	8	8	19220000	24906000	34946000	50742000	39.6	>sp|Q8WWV3|RT4I1_HUMAN Reticulon-4-interacting protein 1, mitochondrial OS=Homo sapiens GN=RTN4IP1 PE=1 SV=2
Q9UKU7	ACAD8	Isobutyryl-CoA dehydrogenase, mitochondrial	-0.571725	-0.367706	-0.466113		53.275	17.548	20	24	10	11	10	11	18646000	24645000	75206000	101200000	42.7	>sp|Q9UKU7|ACAD8_HUMAN Isobutyryl-CoA dehydrogenase, mitochondrial OS=Homo sapiens GN=ACAD8 PE=1 SV=1
Q9NXE4	SMPD4	Sphingomyelin phosphodiesterase 4	-0.679784	-0.278698	-0.465348		19.715	19.013	42	38	13	14	13	14	46475000	70699000	178040000	227770000	32.3	>sp|Q9NXE4|NSMA3_HUMAN Sphingomyelin phosphodiesterase 4 OS=Homo sapiens GN=SMPD4 PE=1 SV=2
Q92544	TM9SF4	Transmembrane 9 superfamily member 4	-0.77762	-0.208143	-0.464963		45.786	18.469	70	77	13	12	13	12	180370000	281090000	506930000	656500000	22.9	>sp|Q92544|TM9S4_HUMAN Transmembrane 9 superfamily member 4 OS=Homo sapiens GN=TM9SF4 PE=1 SV=2
P31327	CPS1	Carbamoyl-phosphate synthase [ammonia], mitochondrial	-0.831067	-0.173127	-0.464911		17.827	23.313	8	32	4	15	4	15	1499300	1761800	39252000	46558000	17.2	>sp|P31327|CPSM_HUMAN Carbamoyl-phosphate synthase [ammonia], mitochondrial OS=Homo sapiens GN=CPS1 PE=1 SV=2
Q9UL12	SARDH	Sarcosine dehydrogenase, mitochondrial	-0.785425	-0.200128	-0.463296		36.518	14.619	143	180	31	33	31	33	269790000	402300000	1272700000	1627200000	63.8	>sp|Q9UL12|SARDH_HUMAN Sarcosine dehydrogenase, mitochondrial OS=Homo sapiens GN=SARDH PE=1 SV=1
P13498	CYBA	Cytochrome b-245 light chain	-1.04893	-0.0478175	-0.463227		42.222	43.461	9	7	3	2	3	2	23955000	27470000	63259000	74883000	11.3	>sp|P13498|CY24A_HUMAN Cytochrome b-245 light chain OS=Homo sapiens GN=CYBA PE=1 SV=3
P06576	ATP5B	ATP synthase subunit beta, mitochondrial	-0.769772	-0.210264	-0.463063		19.306	21.588	758	676	28	25	28	25	10396000000	15754000000	31623000000	42557000000	73.5	>sp|P06576|ATPB_HUMAN ATP synthase subunit beta, mitochondrial OS=Homo sapiens GN=ATP5B PE=1 SV=3
O00443	PIK3C2A	Phosphatidylinositol 4-phosphate 3-kinase C2 domain-containing subunit alpha	-1.01271	-0.0655722	-0.462773		42.688	20.991	9	23	4	8	4	8	8291300	11529000	95185000	115340000	7.4	>sp|O00443|P3C2A_HUMAN Phosphatidylinositol 4-phosphate 3-kinase C2 domain-containing subunit alpha OS=Homo sapiens GN=PIK3C2A PE=1 SV=2
Q96A35	MRPL24	39S ribosomal protein L24, mitochondrial	-0.518334	-0.408494	-0.462369		25.625	12.333	17	30	7	9	7	9	16728000	22663000	125540000	168780000	42.1	>sp|Q96A35|RM24_HUMAN 39S ribosomal protein L24, mitochondrial OS=Homo sapiens GN=MRPL24 PE=1 SV=1
P51659	HSD17B4	Peroxisomal multifunctional enzyme type 2	-0.794769	-0.186754	-0.458966		24.77	21.873	363	377	36	36	36	36	1920600000	2875100000	6971300000	9079600000	62.2	>sp|P51659|DHB4_HUMAN Peroxisomal multifunctional enzyme type 2 OS=Homo sapiens GN=HSD17B4 PE=1 SV=3
Q5TEU4	NDUFAF5	NADH dehydrogenase [ubiquinone] 1 alpha subcomplex assembly factor 5	-0.439251	-0.47861	-0.458796		93.132	24.402	8	4	4	2	4	2	6681400	7075300	12271000	19732000	16.2	>sp|Q5TEU4|NDUF5_HUMAN NADH dehydrogenase [ubiquinone] 1 alpha subcomplex assembly factor 5 OS=Homo sapiens GN=NDUFAF5 PE=1 SV=1
O95870	ABHD16A	Abhydrolase domain-containing protein 16A	-0.672018	-0.272979	-0.458746		19.855	18.08	14	23	7	11	7	11	12271000	15050000	49741000	66794000	28.5	>sp|O95870|ABHGA_HUMAN Abhydrolase domain-containing protein 16A OS=Homo sapiens GN=ABHD16A PE=1 SV=3
Q3SXM5	HSDL1	Inactive hydroxysteroid dehydrogenase-like protein 1	-0.881978	-0.131063	-0.458206		8.8016	12.986	8	20	6	6	6	6	11777000	19973000	76244000	93438000	25.8	>sp|Q3SXM5|HSDL1_HUMAN Inactive hydroxysteroid dehydrogenase-like protein 1 OS=Homo sapiens GN=HSDL1 PE=1 SV=3
Q9UBC3	DNMT3B	DNA (cytosine-5)-methyltransferase 3B	-0.285343	-0.653977	-0.457918		14.6	14.557	3	4	2	3	2	3	2477400	2599400	2230400	3124400	11.7	>sp|Q9UBC3|DNM3B_HUMAN DNA (cytosine-5)-methyltransferase 3B OS=Homo sapiens GN=DNMT3B PE=1 SV=1
Q969M1	TOMM40L	Mitochondrial import receptor subunit TOM40B	-0.483055	-0.432318	-0.457463		47.707	17.639	5	12	2	4	2	4	3852400	4345400	16036000	24690000	16.6	>sp|Q969M1|TM40L_HUMAN Mitochondrial import receptor subunit TOM40B OS=Homo sapiens GN=TOMM40L PE=2 SV=1
Q15397	KIAA0020	Pumilio domain-containing protein KIAA0020	-0.511873	-0.403159	-0.456492		28.373	16.938	40	52	14	16	14	16	24364000	33298000	165270000	215470000	30.1	>sp|Q15397|K0020_HUMAN Pumilio domain-containing protein KIAA0020 OS=Homo sapiens GN=KIAA0020 PE=1 SV=3
O95183	VAMP5	Vesicle-associated membrane protein 5	-0.327457	-0.595695	-0.455351		22.007	37.063	9	7	3	4	3	4	25967000	30965000	43383000	85674000	35.3	>sp|O95183|VAMP5_HUMAN Vesicle-associated membrane protein 5 OS=Homo sapiens GN=VAMP5 PE=1 SV=1
Q9BRR6	ADPGK	ADP-dependent glucokinase	-0.681674	-0.257493	-0.45405		17.897	28.212	89	43	13	8	13	8	149180000	208000000	312090000	396520000	37	>sp|Q9BRR6|ADPGK_HUMAN ADP-dependent glucokinase OS=Homo sapiens GN=ADPGK PE=1 SV=1
Q96RP9	GFM1	Elongation factor G, mitochondrial	-0.773153	-0.192699	-0.453928		23.772	26.615	53	79	20	22	20	22	51228000	76951000	356720000	426610000	45.5	>sp|Q96RP9|EFGM_HUMAN Elongation factor G, mitochondrial OS=Homo sapiens GN=GFM1 PE=1 SV=2
Q9P2R7	SUCLA2	Succinyl-CoA ligase [ADP-forming] subunit beta, mitochondrial	-0.640436	-0.288654	-0.453849		26.846	21.847	44	69	14	16	14	16	62366000	84699000	426220000	580680000	49.5	>sp|Q9P2R7|SUCB1_HUMAN Succinyl-CoA ligase [ADP-forming] subunit beta, mitochondrial OS=Homo sapiens GN=SUCLA2 PE=1 SV=3
P35232	PHB	Prohibitin	-0.75446	-0.204016	-0.453143		20.092	18.502	211	223	18	18	18	18	1931500000	2835700000	6991800000	9046300000	75	>sp|P35232|PHB_HUMAN Prohibitin OS=Homo sapiens GN=PHB PE=1 SV=1
P33121	ACSL1	Long-chain-fatty-acid--CoA ligase 1	-0.678613	-0.257856	-0.452949		27.856	19.257	93	98	21	25	20	22	85645000	119370000	442500000	548410000	39.8	>sp|P33121|ACSL1_HUMAN Long-chain-fatty-acid--CoA ligase 1 OS=Homo sapiens GN=ACSL1 PE=1 SV=1
P61803	DAD1	Dolichyl-diphosphooligosaccharide--protein glycosyltransferase subunit DAD1	-0.654252	-0.275722	-0.452608		14.247	29.777	25	41	4	4	4	4	286350000	377200000	877750000	1254800000	35.4	>sp|P61803|DAD1_HUMAN Dolichyl-diphosphooligosaccharide--protein glycosyltransferase subunit DAD1 OS=Homo sapiens GN=DAD1 PE=1 SV=3
O75396	SEC22B	Vesicle-trafficking protein SEC22b	-0.615605	-0.304978	-0.451947		13.711	20.896	58	103	8	8	8	8	735970000	939490000	2049400000	2982200000	50.7	>sp|O75396|SC22B_HUMAN Vesicle-trafficking protein SEC22b OS=Homo sapiens GN=SEC22B PE=1 SV=4
O15269	SPTLC1	Serine palmitoyltransferase 1	-0.685985	-0.248656	-0.450813		33.073	23.815	45	47	12	11	12	11	80371000	98344000	202090000	248980000	37.6	>sp|O15269|SPTC1_HUMAN Serine palmitoyltransferase 1 OS=Homo sapiens GN=SPTLC1 PE=1 SV=1
Q969Z0	TBRG4	Protein TBRG4	-0.788853	-0.176961	-0.450707		20.712	21.75	49	72	16	14	16	14	133740000	223180000	622260000	777950000	42.8	>sp|Q969Z0|TBRG4_HUMAN Protein TBRG4 OS=Homo sapiens GN=TBRG4 PE=1 SV=1
Q9UGP8	SEC63	Translocation protein SEC63 homolog	-0.766213	-0.191815	-0.450615		27.633	19.458	148	160	26	26	26	26	417540000	560570000	999900000	1221900000	42.9	>sp|Q9UGP8|SEC63_HUMAN Translocation protein SEC63 homolog OS=Homo sapiens GN=SEC63 PE=1 SV=2
Q9Y6I8	PXMP4	Peroxisomal membrane protein 4	-0.597984	-0.315914	-0.450066		19.94	12.671	4	11	2	2	2	2	2170800	3190500	30018000	43067000	8.5	>sp|Q9Y6I8|PXMP4_HUMAN Peroxisomal membrane protein 4 OS=Homo sapiens GN=PXMP4 PE=1 SV=3
Q9UQ53	MGAT4B	Alpha-1,3-mannosyl-glycoprotein 4-beta-N-acetylglucosaminyltransferase B	-0.364909	-0.539928	-0.449766		28.674	17.857	3	9	3	4	3	4	10274000	10445000	14669000	23913000	9.3	>sp|Q9UQ53|MGT4B_HUMAN Alpha-1,3-mannosyl-glycoprotein 4-beta-N-acetylglucosaminyltransferase B OS=Homo sapiens GN=MGAT4B PE=1 SV=1
O95159	ZFPL1	Zinc finger protein-like 1	-0.358284	-0.545474	-0.448845		22.264	27.052	38	18	7	5	7	5	86757000	93284000	54326000	76713000	29.7	>sp|O95159|ZFPL1_HUMAN Zinc finger protein-like 1 OS=Homo sapiens GN=ZFPL1 PE=1 SV=2
Q13888	GTF2H2	General transcription factor IIH subunit 2	-0.329296	-0.578407	-0.448482		25.33	12.487	13	7	5	3	1	1	6018900	7079700	17959000	27672000	18.7	>sp|Q13888|TF2H2_HUMAN General transcription factor IIH subunit 2 OS=Homo sapiens GN=GTF2H2 PE=1 SV=1
Q8IXB1	DNAJC10	DnaJ homolog subfamily C member 10	-0.498353	-0.40021	-0.448447		25.152	17.145	65	65	14	17	14	17	84678000	104510000	171640000	251150000	31	>sp|Q8IXB1|DJC10_HUMAN DnaJ homolog subfamily C member 10 OS=Homo sapiens GN=DNAJC10 PE=1 SV=2
Q00765	REEP5	Receptor expression-enhancing protein 5	-0.428464	-0.467384	-0.447793		22.594	12.515	24	38	5	5	5	5	143330000	164140000	524340000	748540000	16.4	>sp|Q00765|REEP5_HUMAN Receptor expression-enhancing protein 5 OS=Homo sapiens GN=REEP5 PE=1 SV=3
Q9NVJ2	ARL8B	ADP-ribosylation factor-like protein 8B	-0.527271	-0.369829	-0.446403		17.05	15.182	42	37	8	7	3	2	384060000	438810000	733340000	1097700000	45.2	>sp|Q9NVJ2|ARL8B_HUMAN ADP-ribosylation factor-like protein 8B OS=Homo sapiens GN=ARL8B PE=1 SV=1
Q16706	MAN2A1	Alpha-mannosidase 2	-0.546561	-0.352533	-0.446288		24.396	36.549	65	78	25	24	25	24	95427000	122490000	253250000	338400000	34.7	>sp|Q16706|MA2A1_HUMAN Alpha-mannosidase 2 OS=Homo sapiens GN=MAN2A1 PE=1 SV=2
Q9Y4J8	DTNA	Dystrobrevin alpha	-0.412511	-0.480162	-0.44594		17.918	21.21	15	14	6	5	3	1	12315000	13604000	15610000	21531000	20.2	>sp|Q9Y4J8|DTNA_HUMAN Dystrobrevin alpha OS=Homo sapiens GN=DTNA PE=1 SV=2
O95832	CLDN1	Claudin-1	-0.498659	-0.393855	-0.445306		11.54	14.108	25	12	3	3	3	3	30169000	40246000	70116000	115760000	19	>sp|O95832|CLD1_HUMAN Claudin-1 OS=Homo sapiens GN=CLDN1 PE=1 SV=1
Q6P1M0	SLC27A4	Long-chain fatty acid transport protein 4	-0.718351	-0.213378	-0.443883		21.531	14.771	32	33	14	12	13	12	56796000	77926000	106890000	135520000	32.8	>sp|Q6P1M0|S27A4_HUMAN Long-chain fatty acid transport protein 4 OS=Homo sapiens GN=SLC27A4 PE=1 SV=1
Q96GQ5	C16orf58	UPF0420 protein C16orf58	-0.545474	-0.347666	-0.443182		20.8	20.42	8	6	2	3	2	3	8623800	11275000	43224000	20075000	10.3	>sp|Q96GQ5|CP058_HUMAN UPF0420 protein C16orf58 OS=Homo sapiens GN=C16orf58 PE=1 SV=2
Q9H5Q4	TFB2M	Dimethyladenosine transferase 2, mitochondrial	-0.668301	-0.247077	-0.44237		16.287	18.332	24	35	8	11	8	11	24210000	30797000	134960000	154010000	28.8	>sp|Q9H5Q4|TFB2M_HUMAN Dimethyladenosine transferase 2, mitochondrial OS=Homo sapiens GN=TFB2M PE=1 SV=1
Q96GC5	MRPL48	39S ribosomal protein L48, mitochondrial	-0.486354	-0.395721	-0.440326		21.091	36.66	15	21	3	5	3	5	52834000	37821000	82597000	122490000	25	>sp|Q96GC5|RM48_HUMAN 39S ribosomal protein L48, mitochondrial OS=Homo sapiens GN=MRPL48 PE=1 SV=2
Q9NP81	SARS2	Serine--tRNA ligase, mitochondrial	-0.552279	-0.335712	-0.439935		27.283	20.574	59	101	18	20	18	20	136640000	194020000	476990000	665870000	51.5	>sp|Q9NP81|SYSM_HUMAN Serine--tRNA ligase, mitochondrial OS=Homo sapiens GN=SARS2 PE=1 SV=1
Q8WWX9	SELM	Selenoprotein M	-0.38659	-0.494672	-0.439619		22.553	19.891	16	13	5	5	5	5	24578000	27302000	61743000	97942000	60	>sp|Q8WWX9|SELM_HUMAN Selenoprotein M OS=Homo sapiens GN=SELM PE=1 SV=3
Q02218	OGDH	2-oxoglutarate dehydrogenase, mitochondrial	-0.619648	-0.279055	-0.439324		23.656	15.2	122	95	27	22	27	22	158910000	219830000	335850000	468710000	40.9	>sp|Q02218|ODO1_HUMAN 2-oxoglutarate dehydrogenase, mitochondrial OS=Homo sapiens GN=OGDH PE=1 SV=3
Q9NVP1	DDX18	ATP-dependent RNA helicase DDX18	-0.623773	-0.275722	-0.439277		23.724	19.155	143	125	25	23	25	23	312350000	417370000	1002000000	1387900000	53.4	>sp|Q9NVP1|DDX18_HUMAN ATP-dependent RNA helicase DDX18 OS=Homo sapiens GN=DDX18 PE=1 SV=2
Q9BT22	ALG1	Chitobiosyldiphosphodolichol beta-mannosyltransferase	-0.630312	-0.27023	-0.439066		20.855	37.829	46	20	7	5	7	5	33929000	49358000	80042000	105710000	25.6	>sp|Q9BT22|ALG1_HUMAN Chitobiosyldiphosphodolichol beta-mannosyltransferase OS=Homo sapiens GN=ALG1 PE=1 SV=2
Q9UBV2	SEL1L	Protein sel-1 homolog 1	-0.588229	-0.302173	-0.438123		23.262	11.733	42	51	13	14	13	14	45242000	60772000	117910000	156020000	38.3	>sp|Q9UBV2|SE1L1_HUMAN Protein sel-1 homolog 1 OS=Homo sapiens GN=SEL1L PE=1 SV=3
Q9BYT8	NLN	Neurolysin, mitochondrial	-0.746399	-0.183455	-0.437641		21.422	17.081	92	113	25	25	25	25	175620000	257760000	681070000	927040000	49.6	>sp|Q9BYT8|NEUL_HUMAN Neurolysin, mitochondrial OS=Homo sapiens GN=NLN PE=1 SV=1
P22760	AADAC	Arylacetamide deacetylase	-0.679964	-0.23008	-0.437556		15.939	16.992	93	84	15	13	14	12	184770000	255290000	847520000	1122900000	48.6	>sp|P22760|AAAD_HUMAN Arylacetamide deacetylase OS=Homo sapiens GN=AADAC PE=1 SV=5
Q96L58	B3GALT6	Beta-1,3-galactosyltransferase 6	-0.601506	-0.290306	-0.437532		25.263	32.819	18	18	4	5	4	5	11957000	17225000	46221000	62389000	19.5	>sp|Q96L58|B3GT6_HUMAN Beta-1,3-galactosyltransferase 6 OS=Homo sapiens GN=B3GALT6 PE=2 SV=2
O75915	ARL6IP5	PRA1 family protein 3	-0.592923	-0.297133	-0.437461		20.143	6.4784	8	5	2	2	2	2	5495000	8030500	5907500	7084500	20.7	>sp|O75915|PRAF3_HUMAN PRA1 family protein 3 OS=Homo sapiens GN=ARL6IP5 PE=1 SV=1
Q16134	ETFDH	Electron transfer flavoprotein-ubiquinone oxidoreductase, mitochondrial	-0.68733	-0.223299	-0.436738		46.665	29.678	29	36	9	12	9	12	42168000	44027000	148860000	125910000	27.2	>sp|Q16134|ETFD_HUMAN Electron transfer flavoprotein-ubiquinone oxidoreductase, mitochondrial OS=Homo sapiens GN=ETFDH PE=1 SV=2
Q08357	SLC20A2	Sodium-dependent phosphate transporter 2	-0.610417	-0.281312	-0.4365		20.516	21.667	8	17	4	4	4	4	18406000	20352000	41354000	58447000	14.1	>sp|Q08357|S20A2_HUMAN Sodium-dependent phosphate transporter 2 OS=Homo sapiens GN=SLC20A2 PE=1 SV=1
O95140	MFN2	Mitofusin-2	-0.850879	-0.1149	-0.436458		33.834	21.291	27	42	15	16	15	16	24781000	40650000	137400000	146620000	28.9	>sp|O95140|MFN2_HUMAN Mitofusin-2 OS=Homo sapiens GN=MFN2 PE=1 SV=3
Q6YHU6	THADA	Thyroid adenoma-associated protein	0.0943872	-1.28333	-0.435907		95.608	111.93	6	6	2	2	2	2	10374000	38656000	10860000	81113000	2.5	>sp|Q6YHU6|THADA_HUMAN Thyroid adenoma-associated protein OS=Homo sapiens GN=THADA PE=1 SV=1
P49448	GLUD2	Glutamate dehydrogenase 2, mitochondrial	-0.655077	-0.245374	-0.435731		23.898	21.757	36	38	5	9	5	9	61620000	94076000	292190000	401930000	58.4	>sp|P49448|DHE4_HUMAN Glutamate dehydrogenase 2, mitochondrial OS=Homo sapiens GN=GLUD2 PE=1 SV=2
Q9H8H0	NOL11	Nucleolar protein 11	-0.588229	-0.2949	-0.434122		26.852	27.28	33	29	14	14	14	14	26699000	40187000	81923000	102980000	37.1	>sp|Q9H8H0|NOL11_HUMAN Nucleolar protein 11 OS=Homo sapiens GN=NOL11 PE=1 SV=1
Q8WWI5	SLC44A1	Choline transporter-like protein 1	-0.487486	-0.382059	-0.43381		23.434	22.813	20	17	11	5	11	5	18412000	25180000	56333000	84420000	19.6	>sp|Q8WWI5|CTL1_HUMAN Choline transporter-like protein 1 OS=Homo sapiens GN=SLC44A1 PE=1 SV=1
Q9Y697	NFS1	Cysteine desulfurase, mitochondrial	-0.57056	-0.308827	-0.433766		17.817	12.691	64	77	15	16	15	16	80129000	107540000	301420000	413960000	53.6	>sp|Q9Y697|NFS1_HUMAN Cysteine desulfurase, mitochondrial OS=Homo sapiens GN=NFS1 PE=1 SV=3
Q9UDX5	MTFP1	Mitochondrial fission process protein 1	-0.909351	-0.0743683	-0.432277		13.318	22.274	10	11	4	3	4	3	10575000	17118000	42523000	64201000	29.5	>sp|Q9UDX5|MTFP1_HUMAN Mitochondrial fission process protein 1 OS=Homo sapiens GN=MTFP1 PE=1 SV=1
Q9Y394	DHRS7	Dehydrogenase/reductase SDR family member 7	-0.650213	-0.241352	-0.431347		51.08	18.917	129	132	13	12	13	12	523360000	727790000	1805900000	2406400000	49.9	>sp|Q9Y394|DHRS7_HUMAN Dehydrogenase/reductase SDR family member 7 OS=Homo sapiens GN=DHRS7 PE=1 SV=1
Q5SRE5	NUP188	Nucleoporin NUP188 homolog	-0.574247	-0.300534	-0.430909		18.737	21.874	113	84	29	21	29	21	70200000	85857000	198360000	255530000	26.5	>sp|Q5SRE5|NU188_HUMAN Nucleoporin NUP188 homolog OS=Homo sapiens GN=NUP188 PE=1 SV=1
P49748	ACADVL	Very long-chain specific acyl-CoA dehydrogenase, mitochondrial	-0.583615	-0.292546	-0.430753		22.667	15.714	212	238	27	27	27	27	760430000	1002500000	2978000000	4081300000	56.5	>sp|P49748|ACADV_HUMAN Very long-chain specific acyl-CoA dehydrogenase, mitochondrial OS=Homo sapiens GN=ACADVL PE=1 SV=1
Q53GQ0	HSD17B12	Estradiol 17-beta-dehydrogenase 12	-0.594262	-0.282855	-0.430172		20.945	17.952	75	61	14	11	14	11	140440000	177730000	518250000	685120000	47.8	>sp|Q53GQ0|DHB12_HUMAN Estradiol 17-beta-dehydrogenase 12 OS=Homo sapiens GN=HSD17B12 PE=1 SV=2
Q9BV79	MECR	Trans-2-enoyl-CoA reductase, mitochondrial	-0.550802	-0.318346	-0.429897		11.378	15.292	7	8	3	3	3	3	13569000	16701000	24738000	35916000	16.4	>sp|Q9BV79|MECR_HUMAN Trans-2-enoyl-CoA reductase, mitochondrial OS=Homo sapiens GN=MECR PE=1 SV=2
P82933	MRPS9	28S ribosomal protein S9, mitochondrial	-0.564915	-0.305912	-0.429609		13.034	19.641	53	61	16	17	16	17	128790000	160350000	288570000	399540000	59.1	>sp|P82933|RT09_HUMAN 28S ribosomal protein S9, mitochondrial OS=Homo sapiens GN=MRPS9 PE=1 SV=2
Q9UL03	INTS6	Integrator complex subunit 6	-0.447949	-0.409364	-0.428528		22.542	24.508	14	5	9	7	9	7	9886500	9943100	13698000	18814000	21.1	>sp|Q9UL03|INT6_HUMAN Integrator complex subunit 6 OS=Homo sapiens GN=INTS6 PE=1 SV=1
Q10469	MGAT2	Alpha-1,6-mannosyl-glycoprotein 2-beta-N-acetylglucosaminyltransferase	-0.630499	-0.250962	-0.428285		25.417	16.938	29	27	10	9	10	9	46225000	61888000	95613000	117200000	29.5	>sp|Q10469|MGAT2_HUMAN Alpha-1,6-mannosyl-glycoprotein 2-beta-N-acetylglucosaminyltransferase OS=Homo sapiens GN=MGAT2 PE=1 SV=1
Q9Y487	ATP6V0A2	V-type proton ATPase 116 kDa subunit a isoform 2	-0.783498	-0.142217	-0.427516		24.423	17.241	9	17	4	8	4	8	5560900	7679600	32569000	37704000	14	>sp|Q9Y487|VPP2_HUMAN V-type proton ATPase 116 kDa subunit a isoform 2 OS=Homo sapiens GN=ATP6V0A2 PE=1 SV=2
Q15910	EZH2	Histone-lysine N-methyltransferase EZH2	-0.285225	-0.582267	-0.426114		32.224	31.155	12	9	3	3	2	2	6794300	8240400	15709000	25153000	7.1	>sp|Q15910|EZH2_HUMAN Histone-lysine N-methyltransferase EZH2 OS=Homo sapiens GN=EZH2 PE=1 SV=2
Q9NX20	MRPL16	39S ribosomal protein L16, mitochondrial	-0.650121	-0.228603	-0.424022		8.433	24.313	18	22	5	5	5	5	20422000	26688000	86749000	117440000	26.3	>sp|Q9NX20|RM16_HUMAN 39S ribosomal protein L16, mitochondrial OS=Homo sapiens GN=MRPL16 PE=1 SV=1
Q5W111	SPRYD7	SPRY domain-containing protein 7	-0.602837	-0.264837	-0.423961		25.666	13.831	19	12	3	5	3	5	14666000	19217000	32727000	42633000	31.6	>sp|Q5W111|SPRY7_HUMAN SPRY domain-containing protein 7 OS=Homo sapiens GN=SPRYD7 PE=1 SV=2
P49590	HARS2	Probable histidine--tRNA ligase, mitochondrial	-0.551983	-0.305912	-0.423708		20.595	14.449	16	9	8	5	8	5	23980000	28014000	24690000	31419000	35	>sp|P49590|SYHM_HUMAN Probable histidine--tRNA ligase, mitochondrial OS=Homo sapiens GN=HARS2 PE=1 SV=1
O95831	AIFM1	Apoptosis-inducing factor 1, mitochondrial	-0.621806	-0.248656	-0.4232		23.104	22.567	195	196	24	24	24	24	896680000	1215700000	3457900000	4474600000	49.4	>sp|O95831|AIFM1_HUMAN Apoptosis-inducing factor 1, mitochondrial OS=Homo sapiens GN=AIFM1 PE=1 SV=1
Q96SK2	TMEM209	Transmembrane protein 209	-0.701327	-0.189414	-0.422783		26.381	20.656	35	22	11	9	11	9	36043000	48351000	65769000	84673000	34.2	>sp|Q96SK2|TM209_HUMAN Transmembrane protein 209 OS=Homo sapiens GN=TMEM209 PE=1 SV=2
Q8N1S5	SLC39A11	Zinc transporter ZIP11	-0.716508	-0.178109	-0.422337		15.69	26.796	5	13	2	3	2	3	3697100	5115700	13979000	17196000	13.5	>sp|Q8N1S5|S39AB_HUMAN Zinc transporter ZIP11 OS=Homo sapiens GN=SLC39A11 PE=2 SV=3
Q8NE62	CHDH	Choline dehydrogenase, mitochondrial	-0.698307	-0.190046	-0.421909		31.39	33.619	18	23	8	9	8	9	20301000	23816000	62588000	67467000	35.9	>sp|Q8NE62|CHDH_HUMAN Choline dehydrogenase, mitochondrial OS=Homo sapiens GN=CHDH PE=2 SV=2
P51809	VAMP7	Vesicle-associated membrane protein 7	-0.53047	-0.320773	-0.421815		21.022	49.486	8	15	3	4	3	4	7102100	8989400	34356000	36423000	23.2	>sp|P51809|VAMP7_HUMAN Vesicle-associated membrane protein 7 OS=Homo sapiens GN=VAMP7 PE=1 SV=3
Q6NUQ4	TMEM214	Transmembrane protein 214	-0.752834	-0.152638	-0.421746		21.541	20.087	71	50	20	15	20	15	140140000	190270000	433640000	543980000	38.8	>sp|Q6NUQ4|TM214_HUMAN Transmembrane protein 214 OS=Homo sapiens GN=TMEM214 PE=1 SV=2
Q8N3V7	SYNPO	Synaptopodin	-0.481712	-0.364124	-0.42172		16.435	33.629	3	11	2	2	2	2	1788600	1921900	6676600	8334300	7.5	>sp|Q8N3V7|SYNPO_HUMAN Synaptopodin OS=Homo sapiens GN=SYNPO PE=1 SV=2
P55011	SLC12A2	Solute carrier family 12 member 2	-0.503552	-0.34426	-0.421709		23.853	22.553	139	163	30	31	30	31	313220000	884200000	1144500000	1613500000	36.6	>sp|P55011|S12A2_HUMAN Solute carrier family 12 member 2 OS=Homo sapiens GN=SLC12A2 PE=1 SV=1
Q5SNT2	TMEM201	Transmembrane protein 201	-0.650121	-0.221444	-0.419919		13.418	9.4897	7	8	5	4	5	4	3889400	4378000	10134000	11760000	13.4	>sp|Q5SNT2|TM201_HUMAN Transmembrane protein 201 OS=Homo sapiens GN=TMEM201 PE=1 SV=1
Q12797	ASPH	Aspartyl/asparaginyl beta-hydroxylase	-0.565402	-0.286881	-0.419431		22.791	15.517	125	142	25	22	25	22	279410000	344070000	789440000	1023500000	41.4	>sp|Q12797|ASPH_HUMAN Aspartyl/asparaginyl beta-hydroxylase OS=Homo sapiens GN=ASPH PE=1 SV=3
O00411	POLRMT	DNA-directed RNA polymerase, mitochondrial	-0.744592	-0.153416	-0.418933		19.668	39.497	44	46	17	16	17	16	27346000	38980000	58675000	65645000	32.7	>sp|O00411|RPOM_HUMAN DNA-directed RNA polymerase, mitochondrial OS=Homo sapiens GN=POLRMT PE=1 SV=2
P55084	HADHB	Trifunctional enzyme subunit beta, mitochondrial	-0.628634	-0.234992	-0.418428		40.504	38.291	274	217	25	22	25	22	1127700000	1511800000	3787000000	4952700000	50.6	>sp|P55084|ECHB_HUMAN Trifunctional enzyme subunit beta, mitochondrial OS=Homo sapiens GN=HADHB PE=1 SV=3
Q9Y2W6	TDRKH	Tudor and KH domain-containing protein	-0.618333	-0.242328	-0.418115		22.754	17.278	29	31	10	10	10	10	21926000	26854000	33414000	38839000	32.4	>sp|Q9Y2W6|TDRKH_HUMAN Tudor and KH domain-containing protein OS=Homo sapiens GN=TDRKH PE=1 SV=2
Q9BSE5	AGMAT	Agmatinase, mitochondrial	-0.425245	-0.410667	-0.417937		16.694	25.724	171	112	14	14	14	14	1016500000	1188500000	2505600000	3683600000	69.3	>sp|Q9BSE5|SPEB_HUMAN Agmatinase, mitochondrial OS=Homo sapiens GN=AGMAT PE=1 SV=2
O95299	NDUFA10	NADH dehydrogenase [ubiquinone] 1 alpha subcomplex subunit 10, mitochondrial	-0.623399	-0.237809	-0.41776		20.777	15.208	61	72	12	12	12	12	145020000	187920000	374280000	478720000	48.5	>sp|O95299|NDUAA_HUMAN NADH dehydrogenase [ubiquinone] 1 alpha subcomplex subunit 10, mitochondrial OS=Homo sapiens GN=NDUFA10 PE=1 SV=1
A0PJW6	TMEM223	Transmembrane protein 223	-0.738897	-0.154194	-0.417125		32.171	14.516	8	17	2	4	2	4	6529300	11414000	45365000	54930000	17.8	>sp|A0PJW6|TM223_HUMAN Transmembrane protein 223 OS=Homo sapiens GN=TMEM223 PE=1 SV=1
Q9H3N1	TMX1	Thioredoxin-related transmembrane protein 1	-0.576667	-0.271545	-0.416055		32.165	22.416	60	47	11	9	11	9	185400000	229740000	659140000	907550000	28.9	>sp|Q9H3N1|TMX1_HUMAN Thioredoxin-related transmembrane protein 1 OS=Homo sapiens GN=TMX1 PE=1 SV=1
Q99766	ATP5S	ATP synthase subunit s, mitochondrial	-0.323543	-0.513895	-0.415582		11.103	40.714	4	4	2	3	2	3	3229800	3515100	14110000	15996000	27.4	>sp|Q99766|ATP5S_HUMAN ATP synthase subunit s, mitochondrial OS=Homo sapiens GN=ATP5S PE=1 SV=3
O95563	MPC2	Mitochondrial pyruvate carrier 2	-0.701771	-0.176833	-0.415557		18.408	13.203	33	31	5	4	5	4	84817000	137180000	273060000	343230000	33.9	>sp|O95563|MPC2_HUMAN Mitochondrial pyruvate carrier 2 OS=Homo sapiens GN=MPC2 PE=1 SV=1
Q99442	SEC62	Translocation protein SEC62	-0.585924	-0.262193	-0.414997		26.475	40.868	18	23	5	6	5	6	68485000	88983000	299380000	395120000	12	>sp|Q99442|SEC62_HUMAN Translocation protein SEC62 OS=Homo sapiens GN=SEC62 PE=1 SV=1
Q8NBN7	RDH13	Retinol dehydrogenase 13	-0.6072	-0.2444	-0.414426		29.258	14.691	19	24	7	5	7	5	20133000	26450000	57021000	69488000	30.8	>sp|Q8NBN7|RDH13_HUMAN Retinol dehydrogenase 13 OS=Homo sapiens GN=RDH13 PE=1 SV=2
Q9H0U6	MRPL18	39S ribosomal protein L18, mitochondrial	-0.432318	-0.396598	-0.414347		24.32	16.734	14	17	2	4	2	4	16376000	19836000	73928000	68469000	22.2	>sp|Q9H0U6|RM18_HUMAN 39S ribosomal protein L18, mitochondrial OS=Homo sapiens GN=MRPL18 PE=1 SV=1
Q8TCJ2	STT3B	Dolichyl-diphosphooligosaccharide--protein glycosyltransferase subunit STT3B	-0.760349	-0.134484	-0.41374		38.606	17.387	93	86	13	16	13	16	290280000	440650000	1543300000	1980400000	18.2	>sp|Q8TCJ2|STT3B_HUMAN Dolichyl-diphosphooligosaccharide--protein glycosyltransferase subunit STT3B OS=Homo sapiens GN=STT3B PE=1 SV=1
Q86YH6	PDSS2	Decaprenyl-diphosphate synthase subunit 2	-0.632361	-0.222805	-0.413098		19.867	23.737	27	27	9	8	9	8	16830000	21959000	64981000	89556000	43.1	>sp|Q86YH6|DLP1_HUMAN Decaprenyl-diphosphate synthase subunit 2 OS=Homo sapiens GN=PDSS2 PE=1 SV=2
P63173	RPL38	60S ribosomal protein L38	-0.350497	-0.478402	-0.413033		28.488	15.59	54	44	6	5	6	5	164720000	176120000	422940000	667220000	50	>sp|P63173|RL38_HUMAN 60S ribosomal protein L38 OS=Homo sapiens GN=RPL38 PE=1 SV=2
Q16891	IMMT	Mitochondrial inner membrane protein	-0.733268	-0.150949	-0.412926		35.236	21.623	327	358	38	40	38	40	1386300000	1849800000	5284900000	6819200000	67	>sp|Q16891|IMMT_HUMAN Mitochondrial inner membrane protein OS=Homo sapiens GN=IMMT PE=1 SV=1
P49411	TUFM	Elongation factor Tu, mitochondrial	-0.653335	-0.204266	-0.411398		32.569	17.237	379	419	28	29	28	29	2946900000	4244600000	14616000000	19240000000	69.7	>sp|P49411|EFTU_HUMAN Elongation factor Tu, mitochondrial OS=Homo sapiens GN=TUFM PE=1 SV=2
Q9UGM6	WARS2	Tryptophan--tRNA ligase, mitochondrial	-0.387914	-0.433494	-0.410524		22.402	13.048	27	20	9	6	9	6	19039000	20534000	44057000	51741000	50.6	>sp|Q9UGM6|SYWM_HUMAN Tryptophan--tRNA ligase, mitochondrial OS=Homo sapiens GN=WARS2 PE=1 SV=1
Q86UL3	AGPAT6	Glycerol-3-phosphate acyltransferase 4	-0.724563	-0.15069	-0.409278		21.021	13.905	16	17	7	6	6	5	18269000	28213000	67260000	73371000	23.9	>sp|Q86UL3|GPAT4_HUMAN Glycerol-3-phosphate acyltransferase 4 OS=Homo sapiens GN=AGPAT6 PE=1 SV=1
Q68DH5	LMBRD2	LMBR1 domain-containing protein 2	-0.57124	-0.262433	-0.40859		26.322	8.2084	18	3	3	2	3	2	10597000	17275000	5822600	9903800	11.7	>sp|Q68DH5|LMBD2_HUMAN LMBR1 domain-containing protein 2 OS=Homo sapiens GN=LMBRD2 PE=1 SV=1
Q96FZ7	CHMP6	Charged multivesicular body protein 6	-0.467071	-0.352307	-0.408548		24.555	27.357	5	10	3	5	3	5	7028800	6993600	26142000	37681000	26.9	>sp|Q96FZ7|CHMP6_HUMAN Charged multivesicular body protein 6 OS=Homo sapiens GN=CHMP6 PE=1 SV=3
P83881	RPL36A	60S ribosomal protein L36a	-0.633571	-0.212383	-0.40766		23.653	17.02	9	30	4	5	1	2	97228000	113590000	530800000	641420000	32.1	>sp|P83881|RL36A_HUMAN 60S ribosomal protein L36a OS=Homo sapiens GN=RPL36A PE=1 SV=2
O60476	MAN1A2	Mannosyl-oligosaccharide 1,2-alpha-mannosidase IB	-0.686881	-0.172872	-0.407105		18.947	24.737	12	13	3	5	3	5	8059300	10163000	43197000	51372000	10.8	>sp|O60476|MA1A2_HUMAN Mannosyl-oligosaccharide 1,2-alpha-mannosidase IB OS=Homo sapiens GN=MAN1A2 PE=2 SV=1
P00367	GLUD1	Glutamate dehydrogenase 1, mitochondrial	-0.613626	-0.224658	-0.406073		23.791	16.893	454	442	32	26	13	10	6473000000	8344800000	22707000000	30483000000	66.1	>sp|P00367|DHE3_HUMAN Glutamate dehydrogenase 1, mitochondrial OS=Homo sapiens GN=GLUD1 PE=1 SV=2
Q99643	SDHC	Succinate dehydrogenase cytochrome b560 subunit, mitochondrial	-0.85989	-0.0604624	-0.405498		14.785	23.311	18	6	2	2	2	2	24657000	35520000	81534000	100290000	12.4	>sp|Q99643|C560_HUMAN Succinate dehydrogenase cytochrome b560 subunit, mitochondrial OS=Homo sapiens GN=SDHC PE=1 SV=1
Q9BRJ2	MRPL45	39S ribosomal protein L45, mitochondrial	-0.435735	-0.373063	-0.404059		17.073	28.458	33	30	9	9	9	9	67161000	77428000	105290000	153030000	46.1	>sp|Q9BRJ2|RM45_HUMAN 39S ribosomal protein L45, mitochondrial OS=Homo sapiens GN=MRPL45 PE=1 SV=2
P45880	VDAC2	Voltage-dependent anion-selective channel protein 2	-0.423417	-0.383165	-0.403151		23.101	18.264	216	170	14	15	14	15	1758100000	1919700000	4138600000	5915000000	66.3	>sp|P45880|VDAC2_HUMAN Voltage-dependent anion-selective channel protein 2 OS=Homo sapiens GN=VDAC2 PE=1 SV=2
Q9BTV4	TMEM43	Transmembrane protein 43	-0.604071	-0.226385	-0.402904		13.506	20.613	146	137	20	17	20	17	552700000	751870000	1589000000	2138600000	54.5	>sp|Q9BTV4|TMM43_HUMAN Transmembrane protein 43 OS=Homo sapiens GN=TMEM43 PE=1 SV=1
P08183	ABCB1	Multidrug resistance protein 1	-0.51662	-0.296545	-0.402391		47.847	17.082	118	102	32	29	32	29	199050000	225570000	471650000	600530000	34.2	>sp|P08183|MDR1_HUMAN Multidrug resistance protein 1 OS=Homo sapiens GN=ABCB1 PE=1 SV=3
Q969E2	SCAMP4	Secretory carrier-associated membrane protein 4	-0.576377	-0.247077	-0.402352		8.3039	8.5185	9	12	3	2	3	2	72708000	90479000	136080000	189890000	22.3	>sp|Q969E2|SCAM4_HUMAN Secretory carrier-associated membrane protein 4 OS=Homo sapiens GN=SCAMP4 PE=2 SV=1
P07948	LYN	Tyrosine-protein kinase Lyn	-0.510962	-0.301119	-0.402229		6.9331	23.907	4	10	3	4	3	4	5388500	6223800	16411000	17991000	14.3	>sp|P07948|LYN_HUMAN Tyrosine-protein kinase Lyn OS=Homo sapiens GN=LYN PE=1 SV=3
O14646	CHD1	Chromodomain-helicase-DNA-binding protein 1	-0.548141	-0.269033	-0.401848		28.076	35.739	21	21	8	10	8	9	15603000	19200000	30883000	39401000	13.7	>sp|O14646|CHD1_HUMAN Chromodomain-helicase-DNA-binding protein 1 OS=Homo sapiens GN=CHD1 PE=1 SV=2
Q969X6	CIRH1A	Cirhin	-0.614286	-0.215989	-0.401436		24.104	24.438	24	37	11	14	11	14	27837000	34731000	120910000	137250000	32.5	>sp|Q969X6|CIR1A_HUMAN Cirhin OS=Homo sapiens GN=CIRH1A PE=1 SV=1
Q13370	PDE3B	cGMP-inhibited 3,5-cyclic phosphodiesterase B	-0.867896	-0.0494913	-0.401423		22.978	31.86	17	12	4	4	4	4	6551900	11919000	11571000	15680000	8.8	>sp|Q13370|PDE3B_HUMAN cGMP-inhibited 3,5-cyclic phosphodiesterase B OS=Homo sapiens GN=PDE3B PE=1 SV=2
Q9HB09	BCL2L12	Bcl-2-like protein 12	-0.459327	-0.343806	-0.40041		19.638	50.375	4	5	2	3	2	3	5592500	7451900	6916500	9652400	10.8	>sp|Q9HB09|B2L12_HUMAN Bcl-2-like protein 12 OS=Homo sapiens GN=BCL2L12 PE=1 SV=1
P22830	FECH	Ferrochelatase, mitochondrial	-0.523462	-0.286645	-0.400199		13.885	20.061	57	56	15	14	15	14	90952000	112380000	274200000	371100000	51.5	>sp|P22830|HEMH_HUMAN Ferrochelatase, mitochondrial OS=Homo sapiens GN=FECH PE=1 SV=2
P56134	ATP5J2	ATP synthase subunit f, mitochondrial	-0.679153	-0.162855	-0.39803		26.232	12.303	29	14	2	2	2	2	147030000	225890000	265370000	336200000	25.5	>sp|P56134|ATPK_HUMAN ATP synthase subunit f, mitochondrial OS=Homo sapiens GN=ATP5J2 PE=1 SV=3
P26440	IVD	Isovaleryl-CoA dehydrogenase, mitochondrial	-0.416624	-0.379399	-0.397891		18.941	23.393	24	36	10	13	10	13	40493000	45941000	95252000	131190000	39	>sp|P26440|IVD_HUMAN Isovaleryl-CoA dehydrogenase, mitochondrial OS=Homo sapiens GN=IVD PE=1 SV=1
O95573	ACSL3	Long-chain-fatty-acid--CoA ligase 3	-0.553066	-0.257252	-0.39759		28.11	31.01	214	208	31	30	30	28	680660000	863380000	1950300000	2556800000	57.4	>sp|O95573|ACSL3_HUMAN Long-chain-fatty-acid--CoA ligase 3 OS=Homo sapiens GN=ACSL3 PE=1 SV=3
Q9HCU5	PREB	Prolactin regulatory element-binding protein	-0.673376	-0.165944	-0.397464		21.057	21.86	78	68	14	13	14	13	113520000	151160000	262270000	334000000	58.3	>sp|Q9HCU5|PREB_HUMAN Prolactin regulatory element-binding protein OS=Homo sapiens GN=PREB PE=1 SV=2
O75431	MTX2	Metaxin-2	-0.626019	-0.198997	-0.396766		22.412	24.204	63	32	11	8	11	8	128910000	173720000	194950000	252120000	74.5	>sp|O75431|MTX2_HUMAN Metaxin-2 OS=Homo sapiens GN=MTX2 PE=1 SV=1
O94925	GLS	Glutaminase kidney isoform, mitochondrial	-0.597126	-0.220454	-0.396531		22.503	19.807	126	87	26	18	26	18	267500000	362530000	785740000	1022500000	54.6	>sp|O94925|GLSK_HUMAN Glutaminase kidney isoform, mitochondrial OS=Homo sapiens GN=GLS PE=1 SV=1
Q8N6M3	FITM2	Fat storage-inducing transmembrane protein 2	-0.483364	-0.314058	-0.396229		16.092	26.784	4	10	2	3	2	3	1236000	2395600	23340000	35585000	14.5	>sp|Q8N6M3|FITM2_HUMAN Fat storage-inducing transmembrane protein 2 OS=Homo sapiens GN=FITM2 PE=2 SV=1
O15321	TM9SF1	Transmembrane 9 superfamily member 1	-0.728487	-0.124593	-0.39517		55.664	17.43	27	57	8	11	8	11	103020000	217170000	459490000	560690000	24.4	>sp|O15321|TM9S1_HUMAN Transmembrane 9 superfamily member 1 OS=Homo sapiens GN=TM9SF1 PE=2 SV=2
Q9UNL2	SSR3	Translocon-associated protein subunit gamma	-0.675545	-0.159242	-0.394419		14.961	10.938	9	32	2	2	2	2	177790000	231890000	382060000	513490000	15.7	>sp|Q9UNL2|SSRG_HUMAN Translocon-associated protein subunit gamma OS=Homo sapiens GN=SSR3 PE=1 SV=1
O75438	NDUFB1	NADH dehydrogenase [ubiquinone] 1 beta subcomplex subunit 1	-0.349705	-0.439464	-0.393886		23.846	14.899	12	6	3	2	3	2	83022000	86681000	198390000	248540000	34.5	>sp|O75438|NDUB1_HUMAN NADH dehydrogenase [ubiquinone] 1 beta subcomplex subunit 1 OS=Homo sapiens GN=NDUFB1 PE=1 SV=1
Q53S33	BOLA3	BolA-like protein 3	-0.408929	-0.377734	-0.393248		5.6117	10.447	6	5	4	3	4	3	24121000	8501200	56596000	18305000	36.4	>sp|Q53S33|BOLA3_HUMAN BolA-like protein 3 OS=Homo sapiens GN=BOLA3 PE=1 SV=1
Q92903	CDS1	Phosphatidate cytidylyltransferase 1	-0.457227	-0.33182	-0.393161		23.308	14.637	10	12	2	4	2	4	21592000	26018000	19719000	27302000	14.1	>sp|Q92903|CDS1_HUMAN Phosphatidate cytidylyltransferase 1 OS=Homo sapiens GN=CDS1 PE=2 SV=2
Q9NX00	TMEM160	Transmembrane protein 160	-0.635987	-0.184852	-0.392856		11.132	16.729	8	5	2	2	2	2	6502800	9005500	40558000	53147000	16.5	>sp|Q9NX00|TM160_HUMAN Transmembrane protein 160 OS=Homo sapiens GN=TMEM160 PE=1 SV=1
P06756	ITGAV	Integrin alpha-V	-0.41045	-0.374511	-0.392368		27.465	20.373	143	92	34	25	34	25	215430000	247290000	407760000	558420000	42.8	>sp|P06756|ITAV_HUMAN Integrin alpha-V OS=Homo sapiens GN=ITGAV PE=1 SV=2
Q5JTZ9	AARS2	Alanine--tRNA ligase, mitochondrial	-0.713344	-0.129745	-0.392234		27.918	19.324	58	62	19	17	19	17	47392000	70205000	150460000	201140000	39.9	>sp|Q5JTZ9|SYAM_HUMAN Alanine--tRNA ligase, mitochondrial OS=Homo sapiens GN=AARS2 PE=1 SV=1
Q9NRL2	BAZ1A	Bromodomain adjacent to zinc finger domain protein 1A	-0.411209	-0.372841	-0.391898		33.095	17.04	17	17	5	6	5	6	643850000	675070000	31536000	59426000	7.5	>sp|Q9NRL2|BAZ1A_HUMAN Bromodomain adjacent to zinc finger domain protein 1A OS=Homo sapiens GN=BAZ1A PE=1 SV=2
Q15392	DHCR24	Delta(24)-sterol reductase	-0.642933	-0.177981	-0.391807		26.698	18.819	134	130	17	15	17	15	1118000000	1549500000	4616400000	5887500000	32.9	>sp|Q15392|DHC24_HUMAN Delta(24)-sterol reductase OS=Homo sapiens GN=DHCR24 PE=1 SV=2
P35610	SOAT1	Sterol O-acyltransferase 1	-0.663572	-0.162339	-0.391296		14.163	38.547	34	47	6	6	6	6	99224000	128560000	376260000	467820000	17.1	>sp|P35610|SOAT1_HUMAN Sterol O-acyltransferase 1 OS=Homo sapiens GN=SOAT1 PE=1 SV=3
O75208	COQ9	Ubiquinone biosynthesis protein COQ9, mitochondrial	-0.371949	-0.410884	-0.391285		12.944	23.45	10	8	5	5	5	5	13327000	14526000	33773000	54182000	36.8	>sp|O75208|COQ9_HUMAN Ubiquinone biosynthesis protein COQ9, mitochondrial OS=Homo sapiens GN=COQ9 PE=1 SV=1
Q96GC9	VMP1	Vacuole membrane protein 1	-0.56774	-0.233029	-0.390699		24.003	12.884	26	29	3	3	3	3	33928000	47673000	99610000	140060000	13.1	>sp|Q96GC9|VMP1_HUMAN Vacuole membrane protein 1 OS=Homo sapiens GN=VMP1 PE=1 SV=1
P56182	RRP1	Ribosomal RNA processing protein 1 homolog A	-0.400319	-0.379399	-0.389821		30.735	11.734	42	30	13	9	13	9	54382000	66941000	121760000	165620000	33.4	>sp|P56182|RRP1_HUMAN Ribosomal RNA processing protein 1 homolog A OS=Homo sapiens GN=RRP1 PE=1 SV=1
O60911	CTSL2	Cathepsin L2	-0.368265	-0.411643	-0.389791		13.891	34.495	6	5	2	2	2	2	7550300	7767700	7165700	11010000	10.8	>sp|O60911|CATL2_HUMAN Cathepsin L2 OS=Homo sapiens GN=CTSL2 PE=1 SV=2
Q8N5M1	ATPAF2	ATP synthase mitochondrial F1 complex assembly factor 2	-0.467488	-0.314987	-0.389223		16.114	20.614	9	16	5	4	5	4	5333000	7287300	35883000	49603000	41.5	>sp|Q8N5M1|ATPF2_HUMAN ATP synthase mitochondrial F1 complex assembly factor 2 OS=Homo sapiens GN=ATPAF2 PE=1 SV=1
Q6PI78	TMEM65	Transmembrane protein 65	-0.544386	-0.246955	-0.38802		15.693	17.69	13	9	4	4	4	4	8644700	10974000	21222000	30978000	27.5	>sp|Q6PI78|TMM65_HUMAN Transmembrane protein 65 OS=Homo sapiens GN=TMEM65 PE=1 SV=2
Q9Y512	SAMM50	Sorting and assembly machinery component 50 homolog	-0.499986	-0.282973	-0.387403		26.921	32.67	90	85	18	17	18	17	278270000	326840000	485460000	670200000	52.2	>sp|Q9Y512|SAM50_HUMAN Sorting and assembly machinery component 50 homolog OS=Homo sapiens GN=SAMM50 PE=1 SV=3
P31930	UQCRC1	Cytochrome b-c1 complex subunit 1, mitochondrial	-0.581689	-0.213627	-0.385952		33.465	17.921	240	222	20	18	20	18	1667200000	2189100000	3893500000	5126400000	57.9	>sp|P31930|QCR1_HUMAN Cytochrome b-c1 complex subunit 1, mitochondrial OS=Homo sapiens GN=UQCRC1 PE=1 SV=3
Q9BQ75	CMSS1	Protein CMSS1	-0.503959	-0.27608	-0.385525		18.731	24.651	5	10	3	4	3	4	3889100	5620500	27159000	30140000	20.1	>sp|Q9BQ75|CMS1_HUMAN Protein CMSS1 OS=Homo sapiens GN=CMSS1 PE=1 SV=2
Q02318	CYP27A1	Sterol 26-hydroxylase, mitochondrial	-0.817787	-0.0521377	-0.384755		16.021	17.525	12	27	5	8	5	8	4865700	7997300	75670000	82390000	27.3	>sp|Q02318|CP27A_HUMAN Sterol 26-hydroxylase, mitochondrial OS=Homo sapiens GN=CYP27A1 PE=1 SV=1
O94826	TOMM70A	Mitochondrial import receptor subunit TOM70	-0.572308	-0.216113	-0.383245		22.634	20.264	298	263	30	29	30	29	888310000	1136900000	2517000000	3126700000	71.1	>sp|O94826|TOM70_HUMAN Mitochondrial import receptor subunit TOM70 OS=Homo sapiens GN=TOMM70A PE=1 SV=1
Q16540	MRPL23	39S ribosomal protein L23, mitochondrial	-0.342555	-0.424922	-0.383151		40.534	12.308	13	6	4	5	4	5	24595000	27391000	38468000	48863000	34	>sp|Q16540|RM23_HUMAN 39S ribosomal protein L23, mitochondrial OS=Homo sapiens GN=MRPL23 PE=1 SV=1
O14734	ACOT8	Acyl-coenzyme A thioesterase 8	-0.514198	-0.262914	-0.383092		16.721	28.03	22	23	5	5	5	5	15939000	17139000	54688000	72350000	18.2	>sp|O14734|ACOT8_HUMAN Acyl-coenzyme A thioesterase 8 OS=Homo sapiens GN=ACOT8 PE=1 SV=1
Q76FK4	NOL8	Nucleolar protein 8	-0.581785	-0.208018	-0.382831		23.514	29.514	23	14	7	8	7	8	11321000	15110000	14569000	18694000	15.5	>sp|Q76FK4|NOL8_HUMAN Nucleolar protein 8 OS=Homo sapiens GN=NOL8 PE=1 SV=1
O75439	PMPCB	Mitochondrial-processing peptidase subunit beta	-0.552672	-0.229342	-0.381968		26.4	18.092	149	139	24	22	23	21	390330000	495390000	1279500000	1668900000	62	>sp|O75439|MPPB_HUMAN Mitochondrial-processing peptidase subunit beta OS=Homo sapiens GN=PMPCB PE=1 SV=2
Q15022	SUZ12	Polycomb protein SUZ12	-0.273337	-0.498455	-0.38151		4.2713	14.632	3	5	2	2	2	2	960710	996540	4706500	7783500	7	>sp|Q15022|SUZ12_HUMAN Polycomb protein SUZ12 OS=Homo sapiens GN=SUZ12 PE=1 SV=3
P82650	MRPS22	28S ribosomal protein S22, mitochondrial	-0.466444	-0.301119	-0.381415		15.132	15.501	63	66	15	15	15	15	180710000	214310000	631910000	886170000	47.5	>sp|P82650|RT22_HUMAN 28S ribosomal protein S22, mitochondrial OS=Homo sapiens GN=MRPS22 PE=1 SV=1
O94905	ERLIN2	Erlin-2	-0.603881	-0.18574	-0.379714		20.238	14.972	127	143	20	18	17	15	300720000	412410000	1548700000	1984600000	58.4	>sp|O94905|ERLN2_HUMAN Erlin-2 OS=Homo sapiens GN=ERLIN2 PE=1 SV=1
Q9NUQ2	AGPAT5	1-acyl-sn-glycerol-3-phosphate acyltransferase epsilon	-0.741661	-0.0903114	-0.379535		30.05	21.116	9	13	5	4	5	4	5720200	9629200	18227000	28416000	21.4	>sp|Q9NUQ2|PLCE_HUMAN 1-acyl-sn-glycerol-3-phosphate acyltransferase epsilon OS=Homo sapiens GN=AGPAT5 PE=1 SV=3
Q9P035	PTPLAD1	Very-long-chain (3R)-3-hydroxyacyl-[acyl-carrier protein] dehydratase 3	-0.58477	-0.199123	-0.379099		40.402	11.564	70	68	11	9	11	9	340200000	466310000	1643000000	2143600000	30.9	>sp|Q9P035|HACD3_HUMAN Very-long-chain (3R)-3-hydroxyacyl-[acyl-carrier protein] dehydratase 3 OS=Homo sapiens GN=PTPLAD1 PE=1 SV=2
P04843	RPN1	Dolichyl-diphosphooligosaccharide--protein glycosyltransferase subunit 1	-0.644502	-0.153286	-0.378088		29.416	18.372	383	373	40	35	40	35	4013900000	5146400000	15421000000	19710000000	68.4	>sp|P04843|RPN1_HUMAN Dolichyl-diphosphooligosaccharide--protein glycosyltransferase subunit 1 OS=Homo sapiens GN=RPN1 PE=1 SV=1
P0CG08	GPR89B	Golgi pH regulator B	-0.586789	-0.195348	-0.377833		27.051	16.119	24	15	4	2	4	2	8956100	12322000	52125000	60429000	16.9	>sp|P0CG08|GPHRB_HUMAN Golgi pH regulator B OS=Homo sapiens GN=GPR89B PE=1 SV=1;>sp|B7ZAQ6|GPHRA_HUMAN Golgi pH regulator A OS=Homo sapiens GN=GPR89A PE=1 SV=2;>sp|A6NKF9|GPHRC_HUMAN Putative Golgi pH regulator C OS=Homo sapiens GN=GPR89C PE=5 SV=2
Q96CB9	NSUN4	5-methylcytosine rRNA methyltransferase NSUN4	-0.735176	-0.0915306	-0.377752		21.728	18.825	8	9	6	4	6	4	8904000	10629000	21262000	31373000	27.3	>sp|Q96CB9|NSUN4_HUMAN 5-methylcytosine rRNA methyltransferase NSUN4 OS=Homo sapiens GN=NSUN4 PE=1 SV=2
Q8N5G2	TMEM57	Macoilin	-0.449324	-0.308943	-0.377427		15.226	11.804	8	6	6	3	6	3	3918500	4356800	8564400	9910300	18.5	>sp|Q8N5G2|MACOI_HUMAN Macoilin OS=Homo sapiens GN=TMEM57 PE=1 SV=1
Q8IXI1	RHOT2	Mitochondrial Rho GTPase 2	-0.566182	-0.210264	-0.377275		18.645	33.619	60	45	13	13	12	12	82633000	101770000	180430000	237940000	41.9	>sp|Q8IXI1|MIRO2_HUMAN Mitochondrial Rho GTPase 2 OS=Homo sapiens GN=RHOT2 PE=1 SV=2
Q9P015	MRPL15	39S ribosomal protein L15, mitochondrial	-0.32458	-0.431463	-0.377032		22.238	24.088	45	29	10	11	10	11	51598000	58066000	121140000	173360000	49.7	>sp|Q9P015|RM15_HUMAN 39S ribosomal protein L15, mitochondrial OS=Homo sapiens GN=MRPL15 PE=1 SV=1
Q5T280	C9orf114	Uncharacterized protein C9orf114	-0.465504	-0.2929	-0.376622		19.589	18.805	9	12	7	5	7	5	65277000	112650000	50025000	79566000	25.3	>sp|Q5T280|CI114_HUMAN Uncharacterized protein C9orf114 OS=Homo sapiens GN=C9orf114 PE=1 SV=3
Q96ER9	CCDC51	Coiled-coil domain-containing protein 51	-0.701771	-0.110898	-0.376294		19.469	23.198	55	60	8	13	8	13	87144000	128050000	299130000	336790000	39.7	>sp|Q96ER9|CCD51_HUMAN Coiled-coil domain-containing protein 51 OS=Homo sapiens GN=CCDC51 PE=1 SV=2
P11498	PC	Pyruvate carboxylase, mitochondrial	-0.796598	-0.0508848	-0.376087		24.59	20.33	721	734	55	57	55	57	4458300000	6862000000	20843000000	25305000000	64.9	>sp|P11498|PYC_HUMAN Pyruvate carboxylase, mitochondrial OS=Homo sapiens GN=PC PE=1 SV=2
O14874	BCKDK	[3-methyl-2-oxobutanoate dehydrogenase [lipoamide]] kinase, mitochondrial	-0.491904	-0.268075	-0.375653		17.894	27.154	5	7	2	3	2	3	3650800	4199900	10443000	13052000	15.8	>sp|O14874|BCKD_HUMAN [3-methyl-2-oxobutanoate dehydrogenase [lipoamide]] kinase, mitochondrial OS=Homo sapiens GN=BCKDK PE=1 SV=2
Q9Y4P3	TBL2	Transducin beta-like protein 2	-0.482642	-0.275841	-0.375539		18.771	18.446	48	58	14	17	14	17	81148000	99484000	494460000	440720000	42.1	>sp|Q9Y4P3|TBL2_HUMAN Transducin beta-like protein 2 OS=Homo sapiens GN=TBL2 PE=1 SV=1
Q9H6K4	OPA3	Optic atrophy 3 protein	-0.685357	-0.11929	-0.374736		21.209	11.86	10	16	4	3	4	3	5819000	9590900	47920000	56728000	39.7	>sp|Q9H6K4|OPA3_HUMAN Optic atrophy 3 protein OS=Homo sapiens GN=OPA3 PE=1 SV=1
Q86UY8	NT5DC3	5-nucleotidase domain-containing protein 3	-0.593115	-0.184725	-0.374517		44.668	22.053	4	14	3	8	3	8	3024400	4330300	54808000	63401000	23.5	>sp|Q86UY8|NT5D3_HUMAN 5-nucleotidase domain-containing protein 3 OS=Homo sapiens GN=NT5DC3 PE=2 SV=1
O00567	NOP56	Nucleolar protein 56	-0.5757	-0.19711	-0.374022		29.383	15.436	234	264	33	31	33	31	713090000	918560000	2724400000	3522300000	70	>sp|O00567|NOP56_HUMAN Nucleolar protein 56 OS=Homo sapiens GN=NOP56 PE=1 SV=4
Q15070	OXA1L	Mitochondrial inner membrane protein OXA1L	-0.781318	-0.0564447	-0.373826		43.58	13.772	19	16	5	7	5	7	11033000	17494000	90182000	105080000	15.9	>sp|Q15070|OXA1L_HUMAN Mitochondrial inner membrane protein OXA1L OS=Homo sapiens GN=OXA1L PE=1 SV=3
Q96GQ7	DDX27	Probable ATP-dependent RNA helicase DDX27	-0.533364	-0.229588	-0.373495		17.906	36.098	54	75	15	23	15	23	65981000	81834000	360800000	471750000	32	>sp|Q96GQ7|DDX27_HUMAN Probable ATP-dependent RNA helicase DDX27 OS=Homo sapiens GN=DDX27 PE=1 SV=2
P04844	RPN2	Dolichyl-diphosphooligosaccharide--protein glycosyltransferase subunit 2	-0.585347	-0.187388	-0.372689		25.928	15.594	287	319	22	21	22	21	2506100000	3471500000	7969900000	10589000000	47.9	>sp|P04844|RPN2_HUMAN Dolichyl-diphosphooligosaccharide--protein glycosyltransferase subunit 2 OS=Homo sapiens GN=RPN2 PE=1 SV=3
P31040	SDHA	Succinate dehydrogenase [ubiquinone] flavoprotein subunit, mitochondrial	-0.40414	-0.341303	-0.372379		15.781	30.33	230	186	29	26	29	26	881020000	1014500000	1851900000	2531700000	60.8	>sp|P31040|DHSA_HUMAN Succinate dehydrogenase [ubiquinone] flavoprotein subunit, mitochondrial OS=Homo sapiens GN=SDHA PE=1 SV=2
Q96EC8	YIPF6	Protein YIPF6	-0.380508	-0.362442	-0.371447		21.957	15.48	12	8	4	2	4	2	12609000	15368000	45597000	59251000	20.3	>sp|Q96EC8|YIPF6_HUMAN Protein YIPF6 OS=Homo sapiens GN=YIPF6 PE=2 SV=2
P49406	MRPL19	39S ribosomal protein L19, mitochondrial	-0.436482	-0.308361	-0.370999		24.338	13.499	14	15	7	6	7	6	33793000	37902000	64765000	67047000	29.1	>sp|P49406|RM19_HUMAN 39S ribosomal protein L19, mitochondrial OS=Homo sapiens GN=MRPL19 PE=1 SV=2
Q96GW9	MARS2	Methionine--tRNA ligase, mitochondrial	-0.491802	-0.259423	-0.370939		57.566	14.653	31	32	13	11	13	11	35074000	41943000	77744000	99016000	38.8	>sp|Q96GW9|SYMM_HUMAN Methionine--tRNA ligase, mitochondrial OS=Homo sapiens GN=MARS2 PE=1 SV=2
P13804	ETFA	Electron transfer flavoprotein subunit alpha, mitochondrial	-0.49917	-0.251204	-0.369866		12.621	14.443	282	237	14	16	14	16	3129600000	3983400000	10653000000	14385000000	63.4	>sp|P13804|ETFA_HUMAN Electron transfer flavoprotein subunit alpha, mitochondrial OS=Homo sapiens GN=ETFA PE=1 SV=1
P20020	ATP2B1	Plasma membrane calcium-transporting ATPase 1	-0.394734	-0.345056	-0.369681		19.148	35.99	224	249	34	35	21	19	705180000	842340000	2183100000	2938100000	38	>sp|P20020|AT2B1_HUMAN Plasma membrane calcium-transporting ATPase 1 OS=Homo sapiens GN=ATP2B1 PE=1 SV=3
Q9H8H2	DDX31	Probable ATP-dependent RNA helicase DDX31	-0.54201	-0.214373	-0.368911		14.889	16.737	5	5	4	3	4	3	3842900	6088300	9848600	13752000	10.2	>sp|Q9H8H2|DDX31_HUMAN Probable ATP-dependent RNA helicase DDX31 OS=Homo sapiens GN=DDX31 PE=1 SV=2
Q969X1	TMBIM1	Protein lifeguard 3	-0.559834	-0.200253	-0.36887		40.924	6.4676	11	8	2	2	2	2	37505000	45593000	70335000	94506000	4.8	>sp|Q969X1|LFG3_HUMAN Protein lifeguard 3 OS=Homo sapiens GN=TMBIM1 PE=1 SV=2
Q8IWB7	WDFY1	WD repeat and FYVE domain-containing protein 1	-0.587749	-0.178364	-0.368584		23.203	22.004	7	9	5	7	5	7	2976700	3885100	28075000	43930000	24.9	>sp|Q8IWB7|WDFY1_HUMAN WD repeat and FYVE domain-containing protein 1 OS=Homo sapiens GN=WDFY1 PE=1 SV=1
Q9Y2Z4	YARS2	Tyrosine--tRNA ligase, mitochondrial	-0.731444	-0.0788831	-0.368578		15.848	13.873	92	80	13	12	13	12	108950000	163800000	381160000	463140000	37.9	>sp|Q9Y2Z4|SYYM_HUMAN Tyrosine--tRNA ligase, mitochondrial OS=Homo sapiens GN=YARS2 PE=1 SV=2
P48449	LSS	Lanosterol synthase	-0.540424	-0.214747	-0.368415		23.034	20.286	140	187	23	26	23	26	388480000	536990000	1502600000	1940600000	43.3	>sp|P48449|ERG7_HUMAN Lanosterol synthase OS=Homo sapiens GN=LSS PE=1 SV=1
Q9Y6M7	SLC4A7	Sodium bicarbonate cotransporter 3	-0.442333	-0.297368	-0.36803		21.907	22.284	40	29	10	9	9	8	32745000	39120000	94000000	116530000	17.4	>sp|Q9Y6M7|S4A7_HUMAN Sodium bicarbonate cotransporter 3 OS=Homo sapiens GN=SLC4A7 PE=1 SV=2
Q9UBM7	DHCR7	7-dehydrocholesterol reductase	-0.636079	-0.141825	-0.367889		12.872	16.096	89	83	7	6	7	6	1706200000	2266100000	6277500000	8357200000	16.2	>sp|Q9UBM7|DHCR7_HUMAN 7-dehydrocholesterol reductase OS=Homo sapiens GN=DHCR7 PE=1 SV=1
Q9BYD2	MRPL9	39S ribosomal protein L9, mitochondrial	-0.437121	-0.301705	-0.367825		19.362	14.387	41	37	8	9	8	9	46766000	60243000	132590000	170580000	36.3	>sp|Q9BYD2|RM09_HUMAN 39S ribosomal protein L9, mitochondrial OS=Homo sapiens GN=MRPL9 PE=1 SV=2
P27487	DPP4	Dipeptidyl peptidase 4	-0.248171	-0.496309	-0.366911		16.64	20.305	238	233	33	32	33	32	1070800000	1107300000	2716500000	4277300000	48.3	>sp|P27487|DPP4_HUMAN Dipeptidyl peptidase 4 OS=Homo sapiens GN=DPP4 PE=1 SV=2
Q709F0	ACAD11	Acyl-CoA dehydrogenase family member 11	-0.758133	-0.0583858	-0.366244		32.335	15.897	36	59	14	18	14	18	30501000	43431000	168820000	210800000	36.8	>sp|Q709F0|ACD11_HUMAN Acyl-CoA dehydrogenase family member 11 OS=Homo sapiens GN=ACAD11 PE=1 SV=2
Q96RQ1	ERGIC2	Endoplasmic reticulum-Golgi intermediate compartment protein 2	-0.57056	-0.187007	-0.366075		17.506	17.719	15	16	4	4	4	4	21174000	26846000	83258000	110610000	18	>sp|Q96RQ1|ERGI2_HUMAN Endoplasmic reticulum-Golgi intermediate compartment protein 2 OS=Homo sapiens GN=ERGIC2 PE=1 SV=2
Q9H0A0	NAT10	N-acetyltransferase 10	-0.519743	-0.227125	-0.366028		27.429	16.931	119	115	27	30	27	30	116240000	149620000	432440000	580860000	42.5	>sp|Q9H0A0|NAT10_HUMAN N-acetyltransferase 10 OS=Homo sapiens GN=NAT10 PE=1 SV=2
Q7LGA3	HS2ST1	Heparan sulfate 2-O-sulfotransferase 1	-0.42503	-0.307079	-0.364849		24.221	18.628	34	15	6	5	6	5	67850000	82957000	207260000	226990000	24.7	>sp|Q7LGA3|HS2ST_HUMAN Heparan sulfate 2-O-sulfotransferase 1 OS=Homo sapiens GN=HS2ST1 PE=1 SV=1
Q5TC12	ATPAF1	ATP synthase mitochondrial F1 complex assembly factor 1	-0.463622	-0.270947	-0.364071		20.578	21.005	38	23	10	7	10	7	47764000	51167000	82244000	110430000	35.4	>sp|Q5TC12|ATPF1_HUMAN ATP synthase mitochondrial F1 complex assembly factor 1 OS=Homo sapiens GN=ATPAF1 PE=1 SV=1
Q16563	SYPL1	Synaptophysin-like protein 1	-0.343351	-0.383718	-0.363393		12.688	26.341	23	12	4	3	4	3	73257000	81837000	92532000	178910000	20.1	>sp|Q16563|SYPL1_HUMAN Synaptophysin-like protein 1 OS=Homo sapiens GN=SYPL1 PE=1 SV=1
Q6NZI2	PTRF	Polymerase I and transcript release factor	-0.476952	-0.257976	-0.363313		18.903	28.658	63	30	10	9	10	9	61315000	78495000	103110000	134360000	37.7	>sp|Q6NZI2|PTRF_HUMAN Polymerase I and transcript release factor OS=Homo sapiens GN=PTRF PE=1 SV=1
Q13084	MRPL28	39S ribosomal protein L28, mitochondrial	-0.381173	-0.345396	-0.363174		41.152	13.762	50	18	9	5	9	5	40938000	51891000	46979000	57623000	53.1	>sp|Q13084|RM28_HUMAN 39S ribosomal protein L28, mitochondrial OS=Homo sapiens GN=MRPL28 PE=1 SV=4
Q9Y289	SLC5A6	Sodium-dependent multivitamin transporter	-0.619366	-0.145482	-0.363054		29.595	19.467	16	15	5	4	5	4	18837000	23055000	51818000	66363000	12.3	>sp|Q9Y289|SC5A6_HUMAN Sodium-dependent multivitamin transporter OS=Homo sapiens GN=SLC5A6 PE=2 SV=2
P39656	DDOST	Dolichyl-diphosphooligosaccharide--protein glycosyltransferase 48 kDa subunit	-0.577441	-0.176195	-0.362913		17.547	12.778	171	165	14	16	14	16	1688700000	2363400000	3966300000	5183700000	52.6	>sp|P39656|OST48_HUMAN Dolichyl-diphosphooligosaccharide--protein glycosyltransferase 48 kDa subunit OS=Homo sapiens GN=DDOST PE=1 SV=4
Q6NVY1	HIBCH	3-hydroxyisobutyryl-CoA hydrolase, mitochondrial	-0.403159	-0.321697	-0.361853		31.54	17.396	52	70	14	14	14	14	63427000	76777000	410310000	553940000	54.1	>sp|Q6NVY1|HIBCH_HUMAN 3-hydroxyisobutyryl-CoA hydrolase, mitochondrial OS=Homo sapiens GN=HIBCH PE=1 SV=2
Q5T8D3	ACBD5	Acyl-CoA-binding domain-containing protein 5	-0.417596	-0.307428	-0.361461		26.315	14.024	63	62	15	13	15	13	201930000	210710000	557290000	738240000	27.7	>sp|Q5T8D3|ACBD5_HUMAN Acyl-CoA-binding domain-containing protein 5 OS=Homo sapiens GN=ACBD5 PE=1 SV=1
Q9NSY1	BMP2K	BMP-2-inducible protein kinase	-0.297955	-0.427284	-0.361171		10.367	29.422	2	5	2	4	2	4	629570	1005200	6315000	8191600	8.1	>sp|Q9NSY1|BMP2K_HUMAN BMP-2-inducible protein kinase OS=Homo sapiens GN=BMP2K PE=1 SV=2
O14735	CDIPT	CDP-diacylglycerol--inositol 3-phosphatidyltransferase	-0.580338	-0.165172	-0.357872		18.592	13.738	6	7	2	2	2	2	10283000	12043000	40283000	46899000	10.3	>sp|O14735|CDIPT_HUMAN CDP-diacylglycerol--inositol 3-phosphatidyltransferase OS=Homo sapiens GN=CDIPT PE=1 SV=1
Q6ZRP7	QSOX2	Sulfhydryl oxidase 2	-0.580435	-0.164915	-0.357767		22.107	37.025	57	57	13	14	13	14	62984000	86361000	153600000	179230000	35.7	>sp|Q6ZRP7|QSOX2_HUMAN Sulfhydryl oxidase 2 OS=Homo sapiens GN=QSOX2 PE=1 SV=3
Q6ZS30	NBEAL1	Neurobeachin-like protein 1	-0.644871	-0.118227	-0.35765		34.404	18.186	7	9	2	5	2	5	2606700	3785500	7725000	8196500	3.2	>sp|Q6ZS30|NBEL1_HUMAN Neurobeachin-like protein 1 OS=Homo sapiens GN=NBEAL1 PE=2 SV=3
Q9Y320	TMX2	Thioredoxin-related transmembrane protein 2	-0.636729	-0.123666	-0.357509		20.036	55.521	60	78	11	11	11	11	694850000	921360000	1796400000	2195800000	48.3	>sp|Q9Y320|TMX2_HUMAN Thioredoxin-related transmembrane protein 2 OS=Homo sapiens GN=TMX2 PE=1 SV=1
Q9UFN0	NIPSNAP3A	Protein NipSnap homolog 3A	-0.327687	-0.387032	-0.357054		48.986	15.108	39	25	11	8	11	8	42060000	50011000	148460000	217230000	58.7	>sp|Q9UFN0|NPS3A_HUMAN Protein NipSnap homolog 3A OS=Homo sapiens GN=NIPSNAP3A PE=1 SV=2
P18564	ITGB6	Integrin beta-6	-0.402395	-0.313014	-0.357012		55.293	5.5941	11	9	2	2	2	2	53269000	63422000	103650000	147270000	2.3	>sp|P18564|ITB6_HUMAN Integrin beta-6 OS=Homo sapiens GN=ITGB6 PE=1 SV=2
Q7L2E3	DHX30	Putative ATP-dependent RNA helicase DHX30	-0.76901	-0.0366088	-0.356824		34.839	24.137	153	173	41	41	41	41	196950000	370520000	990380000	1273800000	44.5	>sp|Q7L2E3|DHX30_HUMAN Putative ATP-dependent RNA helicase DHX30 OS=Homo sapiens GN=DHX30 PE=1 SV=1
Q9Y4F1	FARP1	FERM, RhoGEF and pleckstrin domain-containing protein 1	-0.438186	-0.27965	-0.356741		22.536	21.655	24	27	8	11	8	11	9853400	11977000	73491000	97095000	18.7	>sp|Q9Y4F1|FARP1_HUMAN FERM, RhoGEF and pleckstrin domain-containing protein 1 OS=Homo sapiens GN=FARP1 PE=1 SV=1
Q9NWT1	PAK1IP1	p21-activated protein kinase-interacting protein 1	-0.385265	-0.328722	-0.356716		17.675	17.055	8	12	6	5	6	5	5542800	6451500	36028000	49162000	25	>sp|Q9NWT1|PK1IP_HUMAN p21-activated protein kinase-interacting protein 1 OS=Homo sapiens GN=PAK1IP1 PE=1 SV=2
Q9NZ45	CISD1	CDGSH iron-sulfur domain-containing protein 1	-0.519642	-0.210015	-0.356538		20.805	16.77	53	59	5	5	5	5	146170000	176220000	619540000	793750000	44.4	>sp|Q9NZ45|CISD1_HUMAN CDGSH iron-sulfur domain-containing protein 1 OS=Homo sapiens GN=CISD1 PE=1 SV=1
Q9UG56	PISD	Phosphatidylserine decarboxylase proenzyme	-0.53067	-0.201132	-0.356512		33.327	31.836	21	18	8	10	8	10	24362000	29515000	81239000	88882000	26.9	>sp|Q9UG56|PISD_HUMAN Phosphatidylserine decarboxylase proenzyme OS=Homo sapiens GN=PISD PE=2 SV=4
P10620	MGST1	Microsomal glutathione S-transferase 1	-0.551491	-0.184217	-0.356198		25.533	20.861	53	36	6	4	6	4	372990000	508730000	1288600000	1715500000	30.3	>sp|P10620|MGST1_HUMAN Microsomal glutathione S-transferase 1 OS=Homo sapiens GN=MGST1 PE=1 SV=1
Q9BYD1	MRPL13	39S ribosomal protein L13, mitochondrial	-0.322736	-0.390448	-0.356194		21.605	16.793	41	21	9	9	9	9	62692000	67839000	319110000	256200000	73	>sp|Q9BYD1|RM13_HUMAN 39S ribosomal protein L13, mitochondrial OS=Homo sapiens GN=MRPL13 PE=1 SV=1
Q2TAA5	ALG11	GDP-Man:Man(3)GlcNAc(2)-PP-Dol alpha-1,2-mannosyltransferase	-0.603502	-0.143655	-0.355334		21.645	26.922	13	6	5	4	5	4	13207000	16607000	13425000	14591000	20.5	>sp|Q2TAA5|ALG11_HUMAN GDP-Man:Man(3)GlcNAc(2)-PP-Dol alpha-1,2-mannosyltransferase OS=Homo sapiens GN=ALG11 PE=1 SV=2
Q86UU1	PHLDB1	Pleckstrin homology-like domain family B member 1	-0.496923	-0.225892	-0.355052		40.276	27.608	3	7	3	3	3	3	2325900	2559900	4425700	5875400	5.5	>sp|Q86UU1|PHLB1_HUMAN Pleckstrin homology-like domain family B member 1 OS=Homo sapiens GN=PHLDB1 PE=1 SV=1
Q969Z3	MAR2	MOSC domain-containing protein 2, mitochondrial	-0.50121	-0.221073	-0.354352		13.759	18.768	8	6	3	5	3	5	2408900	3047100	15586000	18533000	23.9	>sp|Q969Z3|MOSC2_HUMAN MOSC domain-containing protein 2, mitochondrial OS=Homo sapiens GN=MARC2 PE=1 SV=1
Q86TX2	ACOT1	Acyl-coenzyme A thioesterase 1	-0.520447	-0.204016	-0.353573		24.498	24.448	119	106	20	17	2	2	359930000	451740000	1006400000	1361700000	64.6	>sp|Q86TX2|ACOT1_HUMAN Acyl-coenzyme A thioesterase 1 OS=Homo sapiens GN=ACOT1 PE=1 SV=1
P54098	POLG	DNA polymerase subunit gamma-1	-0.657366	-0.101247	-0.352674		32.335	21.599	19	26	7	13	7	13	17861000	25759000	50283000	58774000	21.5	>sp|P54098|DPOG1_HUMAN DNA polymerase subunit gamma-1 OS=Homo sapiens GN=POLG PE=1 SV=1
Q9NYK5	MRPL39	39S ribosomal protein L39, mitochondrial	-0.228726	-0.487178	-0.352172		19.183	16.559	34	22	11	8	11	8	48035000	47711000	87884000	154330000	45.6	>sp|Q9NYK5|RM39_HUMAN 39S ribosomal protein L39, mitochondrial OS=Homo sapiens GN=MRPL39 PE=1 SV=3
Q96JC1	VPS39	Vam6/Vps39-like protein	-0.670025	-0.0918015	-0.352136		7.2943	14.647	5	7	5	4	5	4	1610000	1791800	54425000	60954000	14.6	>sp|Q96JC1|VPS39_HUMAN Vam6/Vps39-like protein OS=Homo sapiens GN=VPS39 PE=1 SV=2
Q9BXW7	CECR5	Cat eye syndrome critical region protein 5	-0.546462	-0.179001	-0.351064		27.457	20.077	112	110	15	14	15	14	326850000	437420000	763730000	991290000	53.4	>sp|Q9BXW7|CECR5_HUMAN Cat eye syndrome critical region protein 5 OS=Homo sapiens GN=CECR5 PE=1 SV=1
O15381	NVL	Nuclear valosin-containing protein-like	-0.356031	-0.346078	-0.351046		15.415	13.795	22	20	11	10	11	10	15803000	20028000	37745000	54465000	25.6	>sp|O15381|NVL_HUMAN Nuclear valosin-containing protein-like OS=Homo sapiens GN=NVL PE=1 SV=1
O75367	H2AFY	Core histone macro-H2A.1	-0.457647	-0.25084	-0.350541		25.104	20.784	158	124	16	18	14	16	922610000	1119700000	2181300000	3031100000	52.2	>sp|O75367|H2AY_HUMAN Core histone macro-H2A.1 OS=Homo sapiens GN=H2AFY PE=1 SV=4
Q96DB5	RMDN1	Regulator of microtubule dynamics protein 1	-0.359071	-0.34153	-0.350274		15.689	35.643	25	26	7	7	7	7	34354000	37175000	133970000	171860000	29.6	>sp|Q96DB5|RMD1_HUMAN Regulator of microtubule dynamics protein 1 OS=Homo sapiens GN=RMDN1 PE=1 SV=1
Q9Y673	ALG5	Dolichyl-phosphate beta-glucosyltransferase	-0.569297	-0.159629	-0.34997		63.593	33.428	26	18	7	7	7	7	31081000	39625000	81942000	108450000	33.3	>sp|Q9Y673|ALG5_HUMAN Dolichyl-phosphate beta-glucosyltransferase OS=Homo sapiens GN=ALG5 PE=1 SV=1
Q8WVQ1	CANT1	Soluble calcium-activated nucleotidase 1	-0.4246	-0.278936	-0.34993		38.841	26.333	25	12	10	8	10	8	33300000	42644000	38432000	55422000	50.6	>sp|Q8WVQ1|CANT1_HUMAN Soluble calcium-activated nucleotidase 1 OS=Homo sapiens GN=CANT1 PE=1 SV=1
P23786	CPT2	Carnitine O-palmitoyltransferase 2, mitochondrial	-0.521352	-0.195474	-0.349231		25.64	25.909	176	157	26	28	26	28	286370000	361810000	996710000	1285400000	52.4	>sp|P23786|CPT2_HUMAN Carnitine O-palmitoyltransferase 2, mitochondrial OS=Homo sapiens GN=CPT2 PE=1 SV=2
P10809	HSPD1	60 kDa heat shock protein, mitochondrial	-0.45586	-0.249021	-0.348737		21.255	20.235	1277	1250	51	43	51	43	26099000000	30807000000	69549000000	93431000000	81.2	>sp|P10809|CH60_HUMAN 60 kDa heat shock protein, mitochondrial OS=Homo sapiens GN=HSPD1 PE=1 SV=2
Q8N2G8	GHDC	GH3 domain-containing protein	-0.538439	-0.180912	-0.348628		18.549	189.8	34	41	10	9	10	9	16964000	21246000	3832100000	101170000	29.2	>sp|Q8N2G8|GHDC_HUMAN GH3 domain-containing protein OS=Homo sapiens GN=GHDC PE=1 SV=2
Q8NBZ7	UXS1	UDP-glucuronic acid decarboxylase 1	-0.294077	-0.40523	-0.348583		23.965	63.197	17	9	6	5	6	5	14081000	14638000	16792000	29022000	30	>sp|Q8NBZ7|UXS1_HUMAN UDP-glucuronic acid decarboxylase 1 OS=Homo sapiens GN=UXS1 PE=1 SV=1
Q6DKI1	RPL7L1	60S ribosomal protein L7-like 1	-0.649569	-0.0996318	-0.348554		20.331	19.94	13	18	4	6	4	6	14026000	17233000	64704000	78268000	30.9	>sp|Q6DKI1|RL7L_HUMAN 60S ribosomal protein L7-like 1 OS=Homo sapiens GN=RPL7L1 PE=1 SV=1
P18031	PTPN1	Tyrosine-protein phosphatase non-receptor type 1	-0.328492	-0.368377	-0.348297		49.099	27.992	67	75	18	20	18	20	151100000	173080000	436030000	785170000	57.2	>sp|P18031|PTN1_HUMAN Tyrosine-protein phosphatase non-receptor type 1 OS=Homo sapiens GN=PTPN1 PE=1 SV=1
O94901	SUN1	SUN domain-containing protein 1	-0.432639	-0.267356	-0.347632		20.839	17.59	33	31	14	13	14	13	31191000	36732000	69371000	81384000	31.8	>sp|O94901|SUN1_HUMAN SUN domain-containing protein 1 OS=Homo sapiens GN=SUN1 PE=1 SV=3
Q14139	UBE4A	Ubiquitin conjugation factor E4 A	-0.761115	-0.0224744	-0.34503		31.161	14.708	55	38	22	17	22	17	70095000	89031000	127630000	143160000	33	>sp|Q14139|UBE4A_HUMAN Ubiquitin conjugation factor E4 A OS=Homo sapiens GN=UBE4A PE=1 SV=2
Q96GZ6	SLC41A3	Solute carrier family 41 member 3	-0.557974	-0.159112	-0.344803		28.441	15.444	7	8	2	3	2	3	820530	858100	5881900	8784300	9.7	>sp|Q96GZ6|S41A3_HUMAN Solute carrier family 41 member 3 OS=Homo sapiens GN=SLC41A3 PE=2 SV=2
O43760	SYNGR2	Synaptogyrin-2	-0.372506	-0.317304	-0.344641		12.642	22.163	17	16	3	3	3	3	33363000	37383000	143780000	218980000	11.6	>sp|O43760|SNG2_HUMAN Synaptogyrin-2 OS=Homo sapiens GN=SYNGR2 PE=1 SV=1
O95202	LETM1	LETM1 and EF-hand domain-containing protein 1, mitochondrial	-0.503858	-0.201132	-0.344569		29.326	16.302	253	235	30	29	30	29	872000000	1072400000	2292600000	2957100000	57.8	>sp|O95202|LETM1_HUMAN LETM1 and EF-hand domain-containing protein 1, mitochondrial OS=Homo sapiens GN=LETM1 PE=1 SV=1
O75063	FAM20B	Glycosaminoglycan xylosylkinase	-0.513895	-0.192825	-0.344447		37.003	18.405	13	21	6	8	6	8	12080000	17582000	59721000	72086000	34.2	>sp|O75063|XYLK_HUMAN Glycosaminoglycan xylosylkinase OS=Homo sapiens GN=FAM20B PE=1 SV=1
Q9UPP1	PHF8	Histone lysine demethylase PHF8	-0.347326	-0.340961	-0.34414		22.857	32.533	5	12	2	3	2	3	763110000	799890000	151100000	223620000	3.6	>sp|Q9UPP1|PHF8_HUMAN Histone lysine demethylase PHF8 OS=Homo sapiens GN=PHF8 PE=1 SV=3;>sp|O75151|PHF2_HUMAN Lysine-specific demethylase PHF2 OS=Homo sapiens GN=PHF2 PE=1 SV=4
Q9P0M9	MRPL27	39S ribosomal protein L27, mitochondrial	-0.305212	-0.38405	-0.344092		22.621	61.477	16	12	4	4	4	4	17234000	21613000	58354000	70744000	35.1	>sp|Q9P0M9|RM27_HUMAN 39S ribosomal protein L27, mitochondrial OS=Homo sapiens GN=MRPL27 PE=1 SV=1
Q92665	MRPS31	28S ribosomal protein S31, mitochondrial	-0.365692	-0.322736	-0.344054		19.306	18.557	95	67	18	15	18	15	116600000	132750000	208520000	283190000	57	>sp|Q92665|RT31_HUMAN 28S ribosomal protein S31, mitochondrial OS=Homo sapiens GN=MRPS31 PE=1 SV=3
P50213	IDH3A	Isocitrate dehydrogenase [NAD] subunit alpha, mitochondrial	-0.428035	-0.262193	-0.342732		45.839	29.711	105	82	15	13	15	13	519580000	580370000	1312300000	1728400000	44.5	>sp|P50213|IDH3A_HUMAN Isocitrate dehydrogenase [NAD] subunit alpha, mitochondrial OS=Homo sapiens GN=IDH3A PE=1 SV=1
Q13795	ARFRP1	ADP-ribosylation factor-related protein 1	-0.0673633	-0.682304	-0.342314		18.693	14.459	8	7	4	3	4	3	22451000	17729000	11996000	19480000	38.8	>sp|Q13795|ARFRP_HUMAN ADP-ribosylation factor-related protein 1 OS=Homo sapiens GN=ARFRP1 PE=1 SV=1
O60830	TIMM17B	Mitochondrial import inner membrane translocase subunit Tim17-B	-0.440102	-0.250598	-0.34224		61.578	17.044	11	15	3	7	3	7	35938000	40927000	67255000	93019000	38.4	>sp|O60830|TI17B_HUMAN Mitochondrial import inner membrane translocase subunit Tim17-B OS=Homo sapiens GN=TIMM17B PE=1 SV=1
Q6PKC3	TXNDC11	Thioredoxin domain-containing protein 11	-0.435949	-0.25411	-0.342166		15.602	14.143	5	11	3	5	3	5	3641000	4148700	15467000	18781000	10.2	>sp|Q6PKC3|TXD11_HUMAN Thioredoxin domain-containing protein 11 OS=Homo sapiens GN=TXNDC11 PE=1 SV=2
Q9HCC0	MCCC2	Methylcrotonoyl-CoA carboxylase beta chain, mitochondrial	-0.513693	-0.188654	-0.342039		37.985	22.186	140	141	23	22	23	22	311440000	437940000	885760000	1092800000	52.9	>sp|Q9HCC0|MCCB_HUMAN Methylcrotonoyl-CoA carboxylase beta chain, mitochondrial OS=Homo sapiens GN=MCCC2 PE=1 SV=1
Q14197	ICT1	Peptidyl-tRNA hydrolase ICT1, mitochondrial	-0.326537	-0.357158	-0.341766		21.306	17.423	15	14	7	5	7	5	31782000	30260000	284900000	102220000	35.9	>sp|Q14197|ICT1_HUMAN Peptidyl-tRNA hydrolase ICT1, mitochondrial OS=Homo sapiens GN=ICT1 PE=1 SV=1
Q9BYC8	MRPL32	39S ribosomal protein L32, mitochondrial	-0.361656	-0.321813	-0.341597		16.189	26.493	22	18	3	4	3	4	48724000	52786000	49248000	74747000	24.5	>sp|Q9BYC8|RM32_HUMAN 39S ribosomal protein L32, mitochondrial OS=Homo sapiens GN=MRPL32 PE=1 SV=1
Q9NNW7	TXNRD2	Thioredoxin reductase 2, mitochondrial	-0.248656	-0.44074	-0.341503		27.396	25.119	39	29	10	7	10	7	111770000	126670000	115960000	163060000	41.6	>sp|Q9NNW7|TRXR2_HUMAN Thioredoxin reductase 2, mitochondrial OS=Homo sapiens GN=TXNRD2 PE=1 SV=3
O75530	EED	Polycomb protein EED	-0.316146	-0.366364	-0.341037		30.603	26.928	19	18	7	8	7	8	11749000	11195000	43816000	60926000	23.8	>sp|O75530|EED_HUMAN Polycomb protein EED OS=Homo sapiens GN=EED PE=1 SV=2
Q8NC60	NOA1	Nitric oxide-associated protein 1	-0.709555	-0.0475383	-0.340903		13.805	25.382	8	7	4	5	4	5	4714300	6680700	10049000	8589900	15.8	>sp|Q8NC60|NOA1_HUMAN Nitric oxide-associated protein 1 OS=Homo sapiens GN=NOA1 PE=1 SV=2
P49792	RANBP2	E3 SUMO-protein ligase RanBP2	-0.479127	-0.214622	-0.340821		23.913	21.908	397	375	97	90	69	68	631430000	720130000	1811100000	2292200000	46.3	>sp|P49792|RBP2_HUMAN E3 SUMO-protein ligase RanBP2 OS=Homo sapiens GN=RANBP2 PE=1 SV=2
Q9UEU0	VTI1B	Vesicle transport through interaction with t-SNAREs homolog 1B	-0.2949	-0.387142	-0.340284		22.835	11.504	11	12	6	7	6	7	9854400	10055000	60225000	53656000	40.1	>sp|Q9UEU0|VTI1B_HUMAN Vesicle transport through interaction with t-SNAREs homolog 1B OS=Homo sapiens GN=VTI1B PE=1 SV=3
Q9Y5Y0	FLVCR1	Feline leukemia virus subgroup C receptor-related protein 1	-0.389347	-0.292428	-0.340074		49.969	27.348	12	23	3	6	3	6	24423000	32085000	49145000	67131000	20.9	>sp|Q9Y5Y0|FLVC1_HUMAN Feline leukemia virus subgroup C receptor-related protein 1 OS=Homo sapiens GN=FLVCR1 PE=1 SV=1
P30084	ECHS1	Enoyl-CoA hydratase, mitochondrial	-0.409038	-0.272262	-0.33903		26.894	15.063	203	194	16	13	16	13	1512800000	1761300000	3234000000	4303600000	62.8	>sp|P30084|ECHM_HUMAN Enoyl-CoA hydratase, mitochondrial OS=Homo sapiens GN=ECHS1 PE=1 SV=4
O14656	TOR1A	Torsin-1A	-0.49917	-0.194717	-0.338927		22.62	20.774	30	18	8	5	8	5	25729000	28530000	75525000	77987000	32.8	>sp|O14656|TOR1A_HUMAN Torsin-1A OS=Homo sapiens GN=TOR1A PE=1 SV=1
P08648	ITGA5	Integrin alpha-5	-0.257856	-0.424707	-0.338871		17.127	20.387	10	17	5	8	5	8	11713000	13898000	38633000	55117000	14.5	>sp|P08648|ITA5_HUMAN Integrin alpha-5 OS=Homo sapiens GN=ITGA5 PE=1 SV=2
Q13523	PRPF4B	Serine/threonine-protein kinase PRP4 homolog	-0.302641	-0.375623	-0.33867		34.822	24.453	84	47	18	15	18	15	58402000	62143000	249090000	376680000	24.6	>sp|Q13523|PRP4B_HUMAN Serine/threonine-protein kinase PRP4 homolog OS=Homo sapiens GN=PRPF4B PE=1 SV=3
Q8TCT8	SPPL2A	Signal peptide peptidase-like 2A	-0.325617	-0.351515	-0.338508		24.176	11.112	7	3	2	2	2	2	10137000	10090000	31691000	45219000	4.8	>sp|Q8TCT8|SPP2A_HUMAN Signal peptide peptidase-like 2A OS=Homo sapiens GN=SPPL2A PE=1 SV=2
Q86TM6	SYVN1	E3 ubiquitin-protein ligase synoviolin	-0.372729	-0.304277	-0.338097		53.476	0.9262	12	3	4	2	4	2	5430200	6479200	17708000	26131000	9.1	>sp|Q86TM6|SYVN1_HUMAN E3 ubiquitin-protein ligase synoviolin OS=Homo sapiens GN=SYVN1 PE=1 SV=2
Q10472	GALNT1	Polypeptide N-acetylgalactosaminyltransferase 1	-0.622087	-0.09815	-0.336464		60.704	32.221	26	30	10	11	8	8	36131000	47701000	129770000	150020000	32	>sp|Q10472|GALT1_HUMAN Polypeptide N-acetylgalactosaminyltransferase 1 OS=Homo sapiens GN=GALNT1 PE=1 SV=1
Q96I99	SUCLG2	Succinyl-CoA ligase [GDP-forming] subunit beta, mitochondrial	-0.459641	-0.222805	-0.336369		14.679	18.263	105	104	19	18	19	18	296820000	313850000	856800000	1682100000	54.4	>sp|Q96I99|SUCB2_HUMAN Succinyl-CoA ligase [GDP-forming] subunit beta, mitochondrial OS=Homo sapiens GN=SUCLG2 PE=1 SV=2
Q9Y2R5	MRPS17	28S ribosomal protein S17, mitochondrial	-0.339251	-0.332851	-0.336048		19.307	13.009	23	15	4	4	4	4	60232000	72005000	154550000	223600000	51.5	>sp|Q9Y2R5|RT17_HUMAN 28S ribosomal protein S17, mitochondrial OS=Homo sapiens GN=MRPS17 PE=2 SV=1
Q15067	ACOX1	Peroxisomal acyl-coenzyme A oxidase 1	-0.482332	-0.20201	-0.335373		25.647	17.841	159	142	25	21	25	21	460620000	581360000	1328500000	1748700000	54.8	>sp|Q15067|ACOX1_HUMAN Peroxisomal acyl-coenzyme A oxidase 1 OS=Homo sapiens GN=ACOX1 PE=1 SV=3
P35914	HMGCL	Hydroxymethylglutaryl-CoA lyase, mitochondrial	-0.23217	-0.445515	-0.334902		24.636	20.633	55	43	11	9	11	9	115880000	116400000	238140000	342080000	47.7	>sp|P35914|HMGCL_HUMAN Hydroxymethylglutaryl-CoA lyase, mitochondrial OS=Homo sapiens GN=HMGCL PE=1 SV=2
O15118	NPC1	Niemann-Pick C1 protein	-0.345737	-0.323428	-0.334539		18.991	28.359	44	49	11	10	11	10	95614000	119960000	361320000	461260000	11.8	>sp|O15118|NPC1_HUMAN Niemann-Pick C1 protein OS=Homo sapiens GN=NPC1 PE=1 SV=2
P34897	SHMT2	Serine hydroxymethyltransferase, mitochondrial	-0.499578	-0.185867	-0.334212		27.877	15.047	335	320	25	25	24	24	3112600000	3827000000	10123000000	13162000000	64.7	>sp|P34897|GLYM_HUMAN Serine hydroxymethyltransferase, mitochondrial OS=Homo sapiens GN=SHMT2 PE=1 SV=3
P61353	RPL27	60S ribosomal protein L27	-0.641638	-0.0802483	-0.333807		26.415	14.701	56	53	7	6	7	6	388690000	504350000	2018000000	2268100000	43.4	>sp|P61353|RL27_HUMAN 60S ribosomal protein L27 OS=Homo sapiens GN=RPL27 PE=1 SV=2
Q9UJ83	HACL1	2-hydroxyacyl-CoA lyase 1	-0.348799	-0.317188	-0.332907		24.25	17.058	97	70	16	13	16	13	251440000	277810000	560400000	727470000	45.5	>sp|Q9UJ83|HACL1_HUMAN 2-hydroxyacyl-CoA lyase 1 OS=Homo sapiens GN=HACL1 PE=1 SV=2
Q92759	GTF2H4	General transcription factor IIH subunit 4	-0.375735	-0.29125	-0.332874		6.2161	21.282	6	3	3	3	3	3	3358100	3204500	3656200	6033600	16.7	>sp|Q92759|TF2H4_HUMAN General transcription factor IIH subunit 4 OS=Homo sapiens GN=GTF2H4 PE=2 SV=1
Q9BXJ8	TMEM120A	Transmembrane protein 120A	-0.737773	-0.0163536	-0.332432		32.644	9.2191	3	6	4	2	4	2	4267200	6301200	12976000	13616000	16.9	>sp|Q9BXJ8|T120A_HUMAN Transmembrane protein 120A OS=Homo sapiens GN=TMEM120A PE=2 SV=1
Q6UB28	METAP1D	Methionine aminopeptidase 1D, mitochondrial	-0.339821	-0.32458	-0.332181		6.0033	25.04	5	13	3	5	3	5	7420800	8177200	36978000	48178000	24.5	>sp|Q6UB28|MAP12_HUMAN Methionine aminopeptidase 1D, mitochondrial OS=Homo sapiens GN=METAP1D PE=1 SV=1
Q9BRQ8	AIFM2	Apoptosis-inducing factor 2	-0.424385	-0.245374	-0.332105		22.486	18.091	50	59	12	11	12	11	66901000	78263000	632120000	673970000	50.9	>sp|Q9BRQ8|AIFM2_HUMAN Apoptosis-inducing factor 2 OS=Homo sapiens GN=AIFM2 PE=1 SV=1
Q6NT16	SLC18B1	MFS-type transporter SLC18B1	-0.498557	-0.181166	-0.331151		19.3	17.877	6	9	3	3	3	3	14230000	20091000	58788000	75824000	9.2	>sp|Q6NT16|S18B1_HUMAN MFS-type transporter SLC18B1 OS=Homo sapiens GN=SLC18B1 PE=2 SV=1
Q96EL3	MRPL53	39S ribosomal protein L53, mitochondrial	-0.387914	-0.272859	-0.32924		14.512	15.361	22	16	4	4	4	4	53976000	60862000	98999000	134990000	42.9	>sp|Q96EL3|RM53_HUMAN 39S ribosomal protein L53, mitochondrial OS=Homo sapiens GN=MRPL53 PE=1 SV=1
Q9NX61	TMEM161A	Transmembrane protein 161A	-0.747688	-0.00446547	-0.328737		21.396	20.096	30	13	3	2	3	2	3758300	5384600	12054000	14687000	20	>sp|Q9NX61|T161A_HUMAN Transmembrane protein 161A OS=Homo sapiens GN=TMEM161A PE=2 SV=1
O43615	TIMM44	Mitochondrial import inner membrane translocase subunit TIM44	-0.384713	-0.274649	-0.328632		28.8	29.188	122	129	20	20	20	20	367890000	407580000	1317600000	1685100000	53.3	>sp|O43615|TIM44_HUMAN Mitochondrial import inner membrane translocase subunit TIM44 OS=Homo sapiens GN=TIMM44 PE=1 SV=2
O95602	POLR1A	DNA-directed RNA polymerase I subunit RPA1	-0.347326	-0.309875	-0.328479		29.225	24.589	94	100	33	37	32	37	127740000	145030000	331110000	427350000	37.7	>sp|O95602|RPA1_HUMAN DNA-directed RNA polymerase I subunit RPA1 OS=Homo sapiens GN=POLR1A PE=1 SV=2
Q9HD33	MRPL47	39S ribosomal protein L47, mitochondrial	-0.328262	-0.327342	-0.327802		11.32	23.308	21	16	7	6	7	6	32174000	34972000	109720000	165000000	30.4	>sp|Q9HD33|RM47_HUMAN 39S ribosomal protein L47, mitochondrial OS=Homo sapiens GN=MRPL47 PE=1 SV=2
Q9HA77	CARS2	Probable cysteine--tRNA ligase, mitochondrial	-0.58246	-0.109427	-0.326642		16.689	33.965	5	7	2	2	2	2	905200	1194400	15804000	17128000	11.2	>sp|Q9HA77|SYCM_HUMAN Probable cysteine--tRNA ligase, mitochondrial OS=Homo sapiens GN=CARS2 PE=1 SV=1
P17301	ITGA2	Integrin alpha-2	-0.254594	-0.401521	-0.326188		25.942	21.813	45	44	15	16	15	16	64284000	65952000	82550000	120510000	26.9	>sp|P17301|ITA2_HUMAN Integrin alpha-2 OS=Homo sapiens GN=ITGA2 PE=1 SV=1
Q6P1L8	MRPL14	39S ribosomal protein L14, mitochondrial	-0.235237	-0.422664	-0.325909		24.609	13.289	23	22	4	4	4	4	38000000	40630000	78431000	115370000	35.9	>sp|Q6P1L8|RM14_HUMAN 39S ribosomal protein L14, mitochondrial OS=Homo sapiens GN=MRPL14 PE=1 SV=1
Q86VR2	FAM134C	Protein FAM134C	-0.458277	-0.20364	-0.325348		16.351	12.13	12	10	3	3	3	3	24026000	32454000	49358000	62168000	15.9	>sp|Q86VR2|F134C_HUMAN Protein FAM134C OS=Homo sapiens GN=FAM134C PE=1 SV=1
O15382	BCAT2	Branched-chain-amino-acid aminotransferase, mitochondrial	-0.40414	-0.24987	-0.324944		23.267	19.813	101	92	15	12	15	12	264550000	303300000	644400000	841830000	48	>sp|O15382|BCAT2_HUMAN Branched-chain-amino-acid aminotransferase, mitochondrial OS=Homo sapiens GN=BCAT2 PE=1 SV=2
P82921	MRPS21	28S ribosomal protein S21, mitochondrial	-0.219587	-0.434668	-0.323123		15.055	20.011	8	13	3	3	3	3	14627000	13122000	59942000	85520000	39.1	>sp|P82921|RT21_HUMAN 28S ribosomal protein S21, mitochondrial OS=Homo sapiens GN=MRPS21 PE=1 SV=2
P46087	NOP2	Putative ribosomal RNA methyltransferase NOP2	-0.370945	-0.27608	-0.322733		15.914	21.447	163	203	26	26	26	26	910720000	938700000	2688400000	3741400000	44.7	>sp|P46087|NOP2_HUMAN Putative ribosomal RNA methyltransferase NOP2 OS=Homo sapiens GN=NOP2 PE=1 SV=2
Q9NRR4	DROSHA	Ribonuclease 3	-0.354114	-0.290896	-0.322159		18.155	16.667	7	3	3	2	3	2	2241400	2598500	4031800	4416700	6.6	>sp|Q9NRR4|RNC_HUMAN Ribonuclease 3 OS=Homo sapiens GN=DROSHA PE=1 SV=2
P51648	ALDH3A2	Fatty aldehyde dehydrogenase	-0.515208	-0.15017	-0.321174		36.773	18.791	124	124	17	14	17	14	276310000	359040000	1161700000	1507100000	48.2	>sp|P51648|AL3A2_HUMAN Fatty aldehyde dehydrogenase OS=Homo sapiens GN=ALDH3A2 PE=1 SV=1
Q92805	GOLGA1	Golgin subfamily A member 1	-0.324926	-0.317072	-0.320994		24.785	37.605	20	30	9	15	9	15	15958000	15445000	49404000	66384000	27.4	>sp|Q92805|GOGA1_HUMAN Golgin subfamily A member 1 OS=Homo sapiens GN=GOLGA1 PE=1 SV=3
Q8N983	MRPL43	39S ribosomal protein L43, mitochondrial	-0.225028	-0.420401	-0.31941		30.633	12.569	18	16	4	5	4	5	63013000	64803000	76229000	122970000	21.9	>sp|Q8N983|RM43_HUMAN 39S ribosomal protein L43, mitochondrial OS=Homo sapiens GN=MRPL43 PE=1 SV=1
Q9NRW7	VPS45	Vacuolar protein sorting-associated protein 45	-0.428357	-0.217479	-0.319068		33.53	16.147	27	26	9	11	9	11	25090000	34426000	66487000	98533000	27.7	>sp|Q9NRW7|VPS45_HUMAN Vacuolar protein sorting-associated protein 45 OS=Homo sapiens GN=VPS45 PE=1 SV=1
P43897	TSFM	Elongation factor Ts, mitochondrial	-0.37951	-0.260387	-0.318719		22.129	19.428	62	73	11	11	11	11	199580000	226860000	489060000	663760000	51.7	>sp|P43897|EFTS_HUMAN Elongation factor Ts, mitochondrial OS=Homo sapiens GN=TSFM PE=1 SV=2
Q9H9P8	L2HGDH	L-2-hydroxyglutarate dehydrogenase, mitochondrial	-0.364348	-0.273576	-0.318248		22.379	24.428	40	40	14	13	14	13	23146000	25950000	147250000	139300000	54	>sp|Q9H9P8|L2HDH_HUMAN L-2-hydroxyglutarate dehydrogenase, mitochondrial OS=Homo sapiens GN=L2HGDH PE=1 SV=3
O95425	SVIL	Supervillin	-0.41045	-0.230326	-0.317578		40.978	20.692	10	15	4	7	4	7	7811200	9851100	18797000	22858000	7.9	>sp|O95425|SVIL_HUMAN Supervillin OS=Homo sapiens GN=SVIL PE=1 SV=2
Q9BXK5	BCL2L13	Bcl-2-like protein 13	-0.376846	-0.260628	-0.317567		27.485	22.906	107	109	16	16	16	16	280820000	312170000	542170000	700470000	59.4	>sp|Q9BXK5|B2L13_HUMAN Bcl-2-like protein 13 OS=Homo sapiens GN=BCL2L13 PE=1 SV=1
Q9BTZ2	DHRS4	Dehydrogenase/reductase SDR family member 4	-0.269153	-0.367036	-0.317264		27.668	20.27	40	29	8	5	5	4	113980000	68998000	99433000	123430000	33.1	>sp|Q9BTZ2|DHRS4_HUMAN Dehydrogenase/reductase SDR family member 4 OS=Homo sapiens GN=DHRS4 PE=1 SV=3
P21397	MAOA	Amine oxidase [flavin-containing] A	-0.669027	-0.0343565	-0.317069		18.171	17.172	10	19	6	7	6	7	22826000	26283000	77064000	84509000	29.4	>sp|P21397|AOFA_HUMAN Amine oxidase [flavin-containing] A OS=Homo sapiens GN=MAOA PE=1 SV=1
Q8IWL3	HSCB	Iron-sulfur cluster co-chaperone protein HscB, mitochondrial	-0.220825	-0.419755	-0.316864		29.087	8.9534	17	6	5	3	5	3	7617500	8176800	19096000	26647000	26.4	>sp|Q8IWL3|HSC20_HUMAN Iron-sulfur cluster co-chaperone protein HscB, mitochondrial OS=Homo sapiens GN=HSCB PE=1 SV=3
Q13206	DDX10	Probable ATP-dependent RNA helicase DDX10	-0.612683	-0.071488	-0.316856		24.225	39.779	27	47	13	16	13	16	25601000	27468000	125050000	147810000	27.7	>sp|Q13206|DDX10_HUMAN Probable ATP-dependent RNA helicase DDX10 OS=Homo sapiens GN=DDX10 PE=1 SV=2
P42695	NCAPD3	Condensin-2 complex subunit D3	-0.398679	-0.239398	-0.316841		29.464	22.532	6	7	3	3	3	3	3502100	4428800	4546100	5227300	5.7	>sp|P42695|CNDD3_HUMAN Condensin-2 complex subunit D3 OS=Homo sapiens GN=NCAPD3 PE=1 SV=2
P31641	SLC6A6	Sodium- and chloride-dependent taurine transporter	-0.508834	-0.146916	-0.316556		22.035	21.757	18	18	4	5	4	5	23755000	29606000	76540000	90996000	10.3	>sp|P31641|SC6A6_HUMAN Sodium- and chloride-dependent taurine transporter OS=Homo sapiens GN=SLC6A6 PE=1 SV=2
P48047	ATP5O	ATP synthase subunit O, mitochondrial	-0.421479	-0.218471	-0.316407		15.39	10.057	95	86	10	8	10	8	1032200000	1183200000	2849000000	3874600000	61	>sp|P48047|ATPO_HUMAN ATP synthase subunit O, mitochondrial OS=Homo sapiens GN=ATP5O PE=1 SV=1
P38117	ETFB	Electron transfer flavoprotein subunit beta	-0.412619	-0.225152	-0.315842		37.025	19.099	288	294	20	19	20	19	3348200000	3756400000	8343600000	11121000000	77.3	>sp|P38117|ETFB_HUMAN Electron transfer flavoprotein subunit beta OS=Homo sapiens GN=ETFB PE=1 SV=3
O15427	SLC16A3	Monocarboxylate transporter 4	-0.309409	-0.320773	-0.31508		20.625	22.393	11	8	3	3	3	3	22925000	19288000	75290000	81052000	6	>sp|O15427|MOT4_HUMAN Monocarboxylate transporter 4 OS=Homo sapiens GN=SLC16A3 PE=1 SV=1
P61313	RPL15	60S ribosomal protein L15	-0.525067	-0.131721	-0.31503		21.93	12.392	83	86	9	10	9	10	668180000	842950000	2624900000	3203100000	37.7	>sp|P61313|RL15_HUMAN 60S ribosomal protein L15 OS=Homo sapiens GN=RPL15 PE=1 SV=2
Q5JPE7	NOMO2	Nodal modulator 2	-0.593115	-0.0803848	-0.314091		24.381	17.824	281	305	41	42	1	3	460460000	597290000	1754900000	2045200000	57.8	>sp|Q5JPE7|NOMO2_HUMAN Nodal modulator 2 OS=Homo sapiens GN=NOMO2 PE=1 SV=1;>sp|P69849|NOMO3_HUMAN Nodal modulator 3 OS=Homo sapiens GN=NOMO3 PE=2 SV=2
Q96RL7	VPS13A	Vacuolar protein sorting-associated protein 13A	-0.56003	-0.103128	-0.313567		24.863	20.173	17	28	11	13	11	13	11558000	16351000	46809000	58078000	9	>sp|Q96RL7|VP13A_HUMAN Vacuolar protein sorting-associated protein 13A OS=Homo sapiens GN=VPS13A PE=1 SV=2
Q8IV63	VRK3	Inactive serine/threonine-protein kinase VRK3	-0.499782	-0.148088	-0.313245		27.225	20.06	12	7	7	6	7	6	9233400	11637000	23024000	25178000	25.5	>sp|Q8IV63|VRK3_HUMAN Inactive serine/threonine-protein kinase VRK3 OS=Homo sapiens GN=VRK3 PE=1 SV=2
Q9Y399	MRPS2	28S ribosomal protein S2, mitochondrial	-0.287118	-0.339365	-0.313005		25.509	65.441	29	18	9	8	9	8	34420000	43360000	131260000	197590000	43.6	>sp|Q9Y399|RT02_HUMAN 28S ribosomal protein S2, mitochondrial OS=Homo sapiens GN=MRPS2 PE=1 SV=1
P00387	CYB5R3	NADH-cytochrome b5 reductase 3	-0.378179	-0.249627	-0.312472		28.076	15.896	221	159	16	17	16	17	1662900000	1879100000	3115400000	4032500000	66.4	>sp|P00387|NB5R3_HUMAN NADH-cytochrome b5 reductase 3 OS=Homo sapiens GN=CYB5R3 PE=1 SV=3
O75390	CS	Citrate synthase, mitochondrial	-0.578794	-0.0875986	-0.312392		19.799	18.911	140	148	17	17	17	17	1080400000	1393200000	4345100000	5083200000	42.1	>sp|O75390|CISY_HUMAN Citrate synthase, mitochondrial OS=Homo sapiens GN=CS PE=1 SV=2
Q92947	GCDH	Glutaryl-CoA dehydrogenase, mitochondrial	-0.499272	-0.146655	-0.312217		41.77	17.719	92	75	12	11	12	11	188770000	253930000	512980000	621220000	52.7	>sp|Q92947|GCDH_HUMAN Glutaryl-CoA dehydrogenase, mitochondrial OS=Homo sapiens GN=GCDH PE=1 SV=1
Q8IVS2	MCAT	Malonyl-CoA-acyl carrier protein transacylase, mitochondrial	-0.382391	-0.245252	-0.312192		20.134	15.999	32	21	10	9	10	9	29371000	36118000	46951000	65735000	45.4	>sp|Q8IVS2|FABD_HUMAN Malonyl-CoA-acyl carrier protein transacylase, mitochondrial OS=Homo sapiens GN=MCAT PE=1 SV=2
O15258	RER1	Protein RER1	-0.385376	-0.242206	-0.312016		9.2172	10.316	6	12	3	4	3	4	16005000	18356000	108340000	144430000	24.5	>sp|O15258|RER1_HUMAN Protein RER1 OS=Homo sapiens GN=RER1 PE=1 SV=1
O60831	PRAF2	PRA1 family protein 2	-0.413594	-0.216858	-0.311875		32.335	11.08	7	3	2	2	2	2	4368600	6991800	19484000	24748000	16.3	>sp|O60831|PRAF2_HUMAN PRA1 family protein 2 OS=Homo sapiens GN=PRAF2 PE=1 SV=1
P52948	NUP98	Nuclear pore complex protein Nup98-Nup96	-0.383718	-0.242816	-0.311547		31.428	20.846	164	165	38	43	38	43	294100000	334570000	708190000	910630000	38	>sp|P52948|NUP98_HUMAN Nuclear pore complex protein Nup98-Nup96 OS=Homo sapiens GN=NUP98 PE=1 SV=4
P22413	ENPP1	Ectonucleotide pyrophosphatase/phosphodiesterase family member 1	-0.340505	-0.282855	-0.311392		19.747	24.616	46	27	16	10	16	10	47891000	54505000	50053000	58191000	32.9	>sp|P22413|ENPP1_HUMAN Ectonucleotide pyrophosphatase/phosphodiesterase family member 1 OS=Homo sapiens GN=ENPP1 PE=1 SV=2
Q9P0I2	EMC3	ER membrane protein complex subunit 3	-0.416191	-0.213503	-0.31129		28.595	30.351	12	34	5	8	5	8	14917000	19060000	80219000	108300000	51	>sp|Q9P0I2|EMC3_HUMAN ER membrane protein complex subunit 3 OS=Homo sapiens GN=EMC3 PE=1 SV=3
Q9BVP2	GNL3	Guanine nucleotide-binding protein-like 3	-0.282262	-0.340847	-0.311257		15.579	21.689	51	32	12	10	12	10	27958000	28054000	53794000	66930000	36.1	>sp|Q9BVP2|GNL3_HUMAN Guanine nucleotide-binding protein-like 3 OS=Homo sapiens GN=GNL3 PE=1 SV=2
Q9H0P0	NT5C3A	Cytosolic 5-nucleotidase 3A	-0.574925	-0.0880058	-0.31102		32.901	20.336	11	26	7	9	7	9	9697500	21654000	93866000	107280000	31	>sp|Q9H0P0|5NT3A_HUMAN Cytosolic 5-nucleotidase 3A OS=Homo sapiens GN=NT5C3A PE=1 SV=3
P19447	ERCC3	TFIIH basal transcription factor complex helicase XPB subunit	-0.159242	-0.480162	-0.310797		12.97	26.57	10	11	3	5	3	5	6636100	6054300	15658000	22886000	12.9	>sp|P19447|ERCC3_HUMAN TFIIH basal transcription factor complex helicase XPB subunit OS=Homo sapiens GN=ERCC3 PE=1 SV=1
P52815	MRPL12	39S ribosomal protein L12, mitochondrial	-0.369383	-0.25411	-0.310596		21.869	11.379	29	33	2	4	2	4	230240000	229180000	537820000	742310000	18.2	>sp|P52815|RM12_HUMAN 39S ribosomal protein L12, mitochondrial OS=Homo sapiens GN=MRPL12 PE=1 SV=2
Q12893	TMEM115	Transmembrane protein 115	-0.621618	-0.0542234	-0.310205		24.882	11.468	14	14	5	3	5	3	16189000	20290000	34245000	37013000	17.4	>sp|Q12893|TM115_HUMAN Transmembrane protein 115 OS=Homo sapiens GN=TMEM115 PE=1 SV=1
Q15582	TGFBI	Transforming growth factor-beta-induced protein ig-h3	-0.234256	-0.389236	-0.309666		23.658	28.69	15	11	6	5	6	5	3800000	4400700	24582000	28325000	16.1	>sp|Q15582|BGH3_HUMAN Transforming growth factor-beta-induced protein ig-h3 OS=Homo sapiens GN=TGFBI PE=1 SV=1
P05023	ATP1A1	Sodium/potassium-transporting ATPase subunit alpha-1	-0.425781	-0.201258	-0.309156		19.451	18.173	523	619	46	49	29	31	4611100000	5233200000	13274000000	17147000000	49.2	>sp|P05023|AT1A1_HUMAN Sodium/potassium-transporting ATPase subunit alpha-1 OS=Homo sapiens GN=ATP1A1 PE=1 SV=1
A1L0T0	ILVBL	Acetolactate synthase-like protein	-0.434455	-0.193835	-0.309134		16.03	15.582	59	59	10	10	10	10	108020000	134640000	222290000	282790000	27.7	>sp|A1L0T0|ILVBL_HUMAN Acetolactate synthase-like protein OS=Homo sapiens GN=ILVBL PE=1 SV=2
Q99567	NUP88	Nuclear pore complex protein Nup88	-0.441802	-0.185993	-0.308235		17.445	31.063	50	64	18	19	18	19	108140000	130560000	275290000	357170000	45.6	>sp|Q99567|NUP88_HUMAN Nuclear pore complex protein Nup88 OS=Homo sapiens GN=NUP88 PE=1 SV=2
Q8WWI1	LMO7	LIM domain only protein 7	-0.286526	-0.330214	-0.308205		21.531	39.167	242	249	41	48	41	48	690550000	722600000	1939300000	2202000000	35.4	>sp|Q8WWI1|LMO7_HUMAN LIM domain only protein 7 OS=Homo sapiens GN=LMO7 PE=1 SV=3
P11387	TOP1	DNA topoisomerase 1	-0.321005	-0.295253	-0.308071		27.834	16.495	221	245	34	37	34	37	1025500000	1068600000	3137300000	4127200000	48.8	>sp|P11387|TOP1_HUMAN DNA topoisomerase 1 OS=Homo sapiens GN=TOP1 PE=1 SV=2
Q5XKP0	QIL1	Protein QIL1	-0.291957	-0.324004	-0.307891		18.375	17.741	47	23	3	3	3	3	40163000	44388000	57811000	80733000	41.5	>sp|Q5XKP0|QIL1_HUMAN Protein QIL1 OS=Homo sapiens GN=QIL1 PE=1 SV=1
Q9NRX2	MRPL17	39S ribosomal protein L17, mitochondrial	-0.340164	-0.275961	-0.307705		15.459	9.8561	23	6	6	4	6	4	25719000	27507000	22839000	34121000	43.4	>sp|Q9NRX2|RM17_HUMAN 39S ribosomal protein L17, mitochondrial OS=Homo sapiens GN=MRPL17 PE=1 SV=1
Q9UHQ9	CYB5R1	NADH-cytochrome b5 reductase 1	-0.485015	-0.14978	-0.307682		22.685	19.388	82	55	15	14	15	14	153650000	202030000	527950000	665610000	61.6	>sp|Q9UHQ9|NB5R1_HUMAN NADH-cytochrome b5 reductase 1 OS=Homo sapiens GN=CYB5R1 PE=1 SV=1
P24752	ACAT1	Acetyl-CoA acetyltransferase, mitochondrial	-0.434455	-0.190678	-0.307424		21.048	14.097	189	156	18	18	18	18	686920000	844480000	2280100000	2893600000	63.2	>sp|P24752|THIL_HUMAN Acetyl-CoA acetyltransferase, mitochondrial OS=Homo sapiens GN=ACAT1 PE=1 SV=1
Q9BQ48	MRPL34	39S ribosomal protein L34, mitochondrial	-0.371615	-0.245861	-0.307368		10.195	12.529	10	7	2	2	2	2	17056000	18908000	36546000	49236000	23.9	>sp|Q9BQ48|RM34_HUMAN 39S ribosomal protein L34, mitochondrial OS=Homo sapiens GN=MRPL34 PE=1 SV=1
Q9H9J2	MRPL44	39S ribosomal protein L44, mitochondrial	-0.411969	-0.209017	-0.306927		28.106	29.171	94	77	16	14	16	14	139870000	172090000	263800000	365490000	53.3	>sp|Q9H9J2|RM44_HUMAN 39S ribosomal protein L44, mitochondrial OS=Homo sapiens GN=MRPL44 PE=1 SV=1
Q96CM8	ACSF2	Acyl-CoA synthetase family member 2, mitochondrial	-0.595981	-0.065848	-0.3067		16.961	24.152	137	123	22	18	22	18	385540000	564280000	1028200000	1215300000	55.8	>sp|Q96CM8|ACSF2_HUMAN Acyl-CoA synthetase family member 2, mitochondrial OS=Homo sapiens GN=ACSF2 PE=1 SV=2
Q96I51	WBSCR16	Williams-Beuren syndrome chromosomal region 16 protein	-0.367483	-0.247806	-0.306404		12.347	21.026	11	14	4	5	4	5	9190900	9973300	23545000	31066000	24.8	>sp|Q96I51|WBS16_HUMAN Williams-Beuren syndrome chromosomal region 16 protein OS=Homo sapiens GN=WBSCR16 PE=1 SV=2
O15127	SCAMP2	Secretory carrier-associated membrane protein 2	-0.409907	-0.209765	-0.306368		10.526	12.884	44	29	2	3	2	3	192740000	221890000	350940000	453990000	11.9	>sp|O15127|SCAM2_HUMAN Secretory carrier-associated membrane protein 2 OS=Homo sapiens GN=SCAMP2 PE=1 SV=2
O14639	ABLIM1	Actin-binding LIM protein 1	-0.289834	-0.32239	-0.30602		34.471	22.999	19	26	9	13	9	13	14879000	17275000	65599000	88784000	27.1	>sp|O14639|ABLM1_HUMAN Actin-binding LIM protein 1 OS=Homo sapiens GN=ABLIM1 PE=1 SV=3
Q07020	RPL18	60S ribosomal protein L18	-0.627794	-0.0430645	-0.306005		17.4	11.959	68	79	5	6	5	6	890600000	1109400000	2974800000	3598700000	34.6	>sp|Q07020|RL18_HUMAN 60S ribosomal protein L18 OS=Homo sapiens GN=RPL18 PE=1 SV=2
P82663	MRPS25	28S ribosomal protein S25, mitochondrial	-0.266877	-0.346191	-0.305989		13.274	28.728	28	29	5	7	5	7	58323000	58486000	142460000	215390000	52	>sp|P82663|RT25_HUMAN 28S ribosomal protein S25, mitochondrial OS=Homo sapiens GN=MRPS25 PE=1 SV=1
P02792	FTL	Ferritin light chain	-0.278104	-0.334339	-0.305948		21.439	47.233	88	79	8	8	8	8	618090000	724730000	1088500000	1519000000	58.3	>sp|P02792|FRIL_HUMAN Ferritin light chain OS=Homo sapiens GN=FTL PE=1 SV=2
Q9UNQ2	DIMT1	Probable dimethyladenosine transferase	-0.407733	-0.209765	-0.305356		15.55	16.759	18	8	6	3	6	3	5340200	6497900	17916000	22086000	28.4	>sp|Q9UNQ2|DIM1_HUMAN Probable dimethyladenosine transferase OS=Homo sapiens GN=DIMT1 PE=1 SV=1
P61106	RAB14	Ras-related protein Rab-14	-0.293606	-0.316377	-0.304947		28.449	15.691	117	111	12	14	12	14	848180000	945590000	1293000000	1796800000	78.6	>sp|P61106|RAB14_HUMAN Ras-related protein Rab-14 OS=Homo sapiens GN=RAB14 PE=1 SV=4
P05556	ITGB1	Integrin beta-1	-0.312084	-0.297837	-0.304943		18.26	19.345	192	141	21	23	21	23	806700000	876530000	1059500000	1498400000	36.6	>sp|P05556|ITB1_HUMAN Integrin beta-1 OS=Homo sapiens GN=ITGB1 PE=1 SV=2
Q9UKM7	MAN1B1	Endoplasmic reticulum mannosyl-oligosaccharide 1,2-alpha-mannosidase	-0.46999	-0.156138	-0.304546		12.658	22.951	33	34	8	9	8	9	261430000	48362000	145760000	242580000	20.3	>sp|Q9UKM7|MA1B1_HUMAN Endoplasmic reticulum mannosyl-oligosaccharide 1,2-alpha-mannosidase OS=Homo sapiens GN=MAN1B1 PE=1 SV=2
P82912	MRPS11	28S ribosomal protein S11, mitochondrial	-0.198997	-0.418352	-0.304509		15.651	12.202	12	11	4	4	4	4	30672000	32613000	45516000	85529000	36.6	>sp|P82912|RT11_HUMAN 28S ribosomal protein S11, mitochondrial OS=Homo sapiens GN=MRPS11 PE=1 SV=2
Q9Y2Q3	GSTK1	Glutathione S-transferase kappa 1	-0.36793	-0.243547	-0.304399		25.98	16.545	125	106	12	11	12	11	623480000	681700000	1703600000	2211200000	61.9	>sp|Q9Y2Q3|GSTK1_HUMAN Glutathione S-transferase kappa 1 OS=Homo sapiens GN=GSTK1 PE=1 SV=3
Q9ULJ8	PPP1R9A	Neurabin-1	-0.596649	-0.0611541	-0.304197		21.897	43.289	13	12	3	2	3	2	37082000	48096000	198530000	233880000	4.8	>sp|Q9ULJ8|NEB1_HUMAN Neurabin-1 OS=Homo sapiens GN=PPP1R9A PE=1 SV=2
O15270	SPTLC2	Serine palmitoyltransferase 2	-0.678433	-0.00676469	-0.303858		21.955	15.718	10	10	4	3	4	3	2544300	3156900	3198400	3563800	16.5	>sp|O15270|SPTC2_HUMAN Serine palmitoyltransferase 2 OS=Homo sapiens GN=SPTLC2 PE=1 SV=1
Q9P2W9	STX18	Syntaxin-18	-0.406863	-0.206518	-0.303216		21.96	16.794	51	20	14	9	14	9	57257000	74116000	78693000	103590000	55.2	>sp|Q9P2W9|STX18_HUMAN Syntaxin-18 OS=Homo sapiens GN=STX18 PE=1 SV=1
P42696	RBM34	RNA-binding protein 34	-0.407407	-0.206018	-0.303201		11.731	19.809	41	35	10	11	10	11	96137000	76661000	129620000	171340000	37.7	>sp|P42696|RBM34_HUMAN RNA-binding protein 34 OS=Homo sapiens GN=RBM34 PE=1 SV=2
Q15286	RAB35	Ras-related protein Rab-35	-0.29772	-0.308361	-0.30303		19.675	16.861	34	17	4	5	4	5	47944000	50402000	125670000	170720000	35.8	>sp|Q15286|RAB35_HUMAN Ras-related protein Rab-35 OS=Homo sapiens GN=RAB35 PE=1 SV=1
Q96CS3	FAF2	FAS-associated factor 2	-0.490981	-0.136323	-0.302781		21.277	16.152	132	110	14	16	14	16	384990000	487040000	1078900000	1368500000	48.8	>sp|Q96CS3|FAF2_HUMAN FAS-associated factor 2 OS=Homo sapiens GN=FAF2 PE=1 SV=2
Q92604	LPGAT1	Acyl-CoA:lysophosphatidylglycerol acyltransferase 1	-0.519341	-0.1129	-0.301855		42.996	32.425	65	62	9	9	9	9	72851000	87151000	235570000	308640000	35.1	>sp|Q92604|LGAT1_HUMAN Acyl-CoA:lysophosphatidylglycerol acyltransferase 1 OS=Homo sapiens GN=LPGAT1 PE=2 SV=1
Q9UK23	NAGPA	N-acetylglucosamine-1-phosphodiester alpha-N-acetylglucosaminidase	-0.219834	-0.388465	-0.301687		19.389	20.155	14	15	10	7	10	7	11122000	16949000	64515000	45547000	27.6	>sp|Q9UK23|NAGPA_HUMAN N-acetylglucosamine-1-phosphodiester alpha-N-acetylglucosaminidase OS=Homo sapiens GN=NAGPA PE=2 SV=2
Q15125	EBP	3-beta-hydroxysteroid-Delta(8),Delta(7)-isomerase	-0.593306	-0.0592169	-0.301686		16.63	22.316	18	20	5	4	5	4	149900000	231200000	3083800000	4484600000	20.9	>sp|Q15125|EBP_HUMAN 3-beta-hydroxysteroid-Delta(8),Delta(7)-isomerase OS=Homo sapiens GN=EBP PE=1 SV=3
Q16720	ATP2B3	Plasma membrane calcium-transporting ATPase 3	-0.333882	-0.27011	-0.301644		11.089	4.1783	5	5	2	3	2	3	58932000	59984000	97651000	127880000	11.6	>sp|Q16720|AT2B3_HUMAN Plasma membrane calcium-transporting ATPase 3 OS=Homo sapiens GN=ATP2B3 PE=1 SV=3
Q96RR1	PEO1	Twinkle protein, mitochondrial	-0.673014	-0.00604658	-0.301326		20.97	15.61	4	3	2	2	2	2	1310600	1893900	1334100	1197000	5.3	>sp|Q96RR1|PEO1_HUMAN Twinkle protein, mitochondrial OS=Homo sapiens GN=PEO1 PE=1 SV=1
Q9BV38	WDR18	WD repeat-containing protein 18	-0.369048	-0.236462	-0.301232		21.173	53.294	42	41	8	9	8	9	87136000	93321000	359280000	480070000	25.9	>sp|Q9BV38|WDR18_HUMAN WD repeat-containing protein 18 OS=Homo sapiens GN=WDR18 PE=1 SV=2
P05154	SERPINA5	Plasma serine protease inhibitor	-0.257011	-0.345056	-0.300362		12.872	17.085	4	13	2	5	2	5	2434500	2632600	16541000	23985000	18.5	>sp|P05154|IPSP_HUMAN Plasma serine protease inhibitor OS=Homo sapiens GN=SERPINA5 PE=1 SV=3
P80365	HSD11B2	Corticosteroid 11-beta-dehydrogenase isozyme 2	-0.477574	-0.142479	-0.300319		27.048	18.471	13	5	7	3	7	3	9362300	10553000	15936000	26781000	37.3	>sp|P80365|DHI2_HUMAN Corticosteroid 11-beta-dehydrogenase isozyme 2 OS=Homo sapiens GN=HSD11B2 PE=1 SV=2
Q9Y2G3	ATP11B	Probable phospholipid-transporting ATPase IF	-0.257131	-0.344715	-0.300258		40.322	42.231	3	6	3	4	3	4	1307300	1705600	26009000	40792000	8.2	>sp|Q9Y2G3|AT11B_HUMAN Probable phospholipid-transporting ATPase IF OS=Homo sapiens GN=ATP11B PE=1 SV=2
Q9NWH9	SLTM	SAFB-like transcription modulator	-0.269153	-0.331591	-0.300034		39.995	32.384	46	65	17	20	17	20	63010000	67407000	195890000	270390000	22.1	>sp|Q9NWH9|SLTM_HUMAN SAFB-like transcription modulator OS=Homo sapiens GN=SLTM PE=1 SV=2
Q13637	RAB32	Ras-related protein Rab-32	-0.398898	-0.206518	-0.299504		15.248	28.521	41	33	9	11	8	10	82290000	93119000	270850000	341020000	63.1	>sp|Q13637|RAB32_HUMAN Ras-related protein Rab-32 OS=Homo sapiens GN=RAB32 PE=1 SV=3
P15291	B4GALT1	Beta-1,4-galactosyltransferase 1	-0.397913	-0.205267	-0.298377		28.507	13.418	22	12	4	2	4	2	8611700	9865400	26715000	33336000	20.1	>sp|P15291|B4GT1_HUMAN Beta-1,4-galactosyltransferase 1 OS=Homo sapiens GN=B4GALT1 PE=1 SV=5
O15400	STX7	Syntaxin-7	-0.326997	-0.27023	-0.298335		17.377	25.879	56	72	8	9	8	9	173110000	199740000	437280000	589220000	56.7	>sp|O15400|STX7_HUMAN Syntaxin-7 OS=Homo sapiens GN=STX7 PE=1 SV=4
Q9BX93	PLA2G12B	Group XIIB secretory phospholipase A2-like protein	-0.0699771	-0.569685	-0.298303		26.686	23.667	15	20	6	5	6	5	24018000	27818000	84856000	130940000	62.6	>sp|Q9BX93|PG12B_HUMAN Group XIIB secretory phospholipase A2-like protein OS=Homo sapiens GN=PLA2G12B PE=1 SV=2
Q6NUM9	RETSAT	All-trans-retinol 13,14-reductase	-0.538538	-0.0923428	-0.298259		24.817	16.32	77	72	15	17	15	17	85240000	104420000	318360000	376130000	45.2	>sp|Q6NUM9|RETST_HUMAN All-trans-retinol 13,14-reductase OS=Homo sapiens GN=RETSAT PE=1 SV=2
O00541	PES1	Pescadillo homolog	-0.624616	-0.032242	-0.298236		28.408	79.883	56	49	12	12	12	12	63310000	81495000	319640000	258160000	25.5	>sp|O00541|PESC_HUMAN Pescadillo homolog OS=Homo sapiens GN=PES1 PE=1 SV=1
O60832	DKC1	H/ACA ribonucleoprotein complex subunit 4	-0.33411	-0.26123	-0.29721		16.358	18.092	78	66	15	15	15	15	170970000	208290000	395130000	524840000	42.2	>sp|O60832|DKC1_HUMAN H/ACA ribonucleoprotein complex subunit 4 OS=Homo sapiens GN=DKC1 PE=1 SV=3
Q9ULQ1	TPCN1	Two pore calcium channel protein 1	-0.8062	0.0786093	-0.297001		17.723	14.605	6	3	3	2	3	2	955940	1367300	80714000	92800000	5.6	>sp|Q9ULQ1|TPC1_HUMAN Two pore calcium channel protein 1 OS=Homo sapiens GN=TPCN1 PE=1 SV=3
Q14108	SCARB2	Lysosome membrane protein 2	-0.248049	-0.347666	-0.296998		24.021	16.173	58	58	9	9	9	9	285950000	275340000	507160000	873070000	25.9	>sp|Q14108|SCRB2_HUMAN Lysosome membrane protein 2 OS=Homo sapiens GN=SCARB2 PE=1 SV=2
Q96G23	CERS2	Ceramide synthase 2	-0.572502	-0.0647449	-0.296399		12.08	19.063	42	39	5	4	5	4	239490000	325290000	1029900000	1251400000	18.7	>sp|Q96G23|CERS2_HUMAN Ceramide synthase 2 OS=Homo sapiens GN=CERS2 PE=1 SV=1
O75882	ATRN	Attractin	-0.162339	-0.443713	-0.296177		16.273	30.888	15	18	6	7	6	7	10095000	10103000	38117000	52655000	10.6	>sp|O75882|ATRN_HUMAN Attractin OS=Homo sapiens GN=ATRN PE=1 SV=2
Q9H1K4	SLC25A18	Mitochondrial glutamate carrier 2	-0.630871	-0.0230425	-0.29518		24.936	14.787	4	13	3	4	3	4	2809100	4173600	21741000	23820000	25.1	>sp|Q9H1K4|GHC2_HUMAN Mitochondrial glutamate carrier 2 OS=Homo sapiens GN=SLC25A18 PE=2 SV=1
O15213	WDR46	WD repeat-containing protein 46	-0.704606	0.0239883	-0.294795		26.957	15.437	13	23	6	9	6	9	10475000	15559000	37982000	39061000	23.4	>sp|O15213|WDR46_HUMAN WD repeat-containing protein 46 OS=Homo sapiens GN=WDR46 PE=1 SV=3
O75521	ECI2	Enoyl-CoA delta isomerase 2, mitochondrial	-0.317188	-0.272262	-0.29455		16.374	12.727	131	81	21	14	21	14	291180000	315460000	422850000	597830000	64.5	>sp|O75521|ECI2_HUMAN Enoyl-CoA delta isomerase 2, mitochondrial OS=Homo sapiens GN=ECI2 PE=1 SV=4
Q7LGC8	CHST3	Carbohydrate sulfotransferase 3	-0.311038	-0.278223	-0.294537		24.551	14.142	9	5	5	3	5	3	13698000	8140100	3310900	3939800	19.8	>sp|Q7LGC8|CHST3_HUMAN Carbohydrate sulfotransferase 3 OS=Homo sapiens GN=CHST3 PE=1 SV=3
O95470	SGPL1	Sphingosine-1-phosphate lyase 1	-0.41846	-0.180148	-0.294389		17.796	28.171	56	77	15	16	15	16	57925000	67932000	368250000	439550000	45.2	>sp|O95470|SGPL1_HUMAN Sphingosine-1-phosphate lyase 1 OS=Homo sapiens GN=SGPL1 PE=1 SV=3
Q9H0S4	DDX47	Probable ATP-dependent RNA helicase DDX47	-0.47176	-0.136191	-0.294241		17.042	18.385	67	51	11	13	11	13	83067000	103450000	234750000	287240000	43.3	>sp|Q9H0S4|DDX47_HUMAN Probable ATP-dependent RNA helicase DDX47 OS=Homo sapiens GN=DDX47 PE=1 SV=1
O75879	PET112	Glutamyl-tRNA(Gln) amidotransferase subunit B, mitochondrial	-0.388906	-0.204391	-0.293701		23.189	17.813	45	44	10	13	10	13	25926000	31860000	101940000	132160000	47	>sp|O75879|GATB_HUMAN Glutamyl-tRNA(Gln) amidotransferase subunit B, mitochondrial OS=Homo sapiens GN=PET112 PE=1 SV=1
Q9NUV7	SPTLC3	Serine palmitoyltransferase 3	-0.51924	-0.0986889	-0.293694		19.385	16.199	14	36	7	10	7	9	10300000	12781000	98417000	118240000	29.7	>sp|Q9NUV7|SPTC3_HUMAN Serine palmitoyltransferase 3 OS=Homo sapiens GN=SPTLC3 PE=1 SV=3
O75251	NDUFS7	NADH dehydrogenase [ubiquinone] iron-sulfur protein 7, mitochondrial	-0.63171	-0.0194885	-0.293365		29.326	18.94	24	37	5	5	5	5	49469000	70803000	820750000	755990000	29.6	>sp|O75251|NDUS7_HUMAN NADH dehydrogenase [ubiquinone] iron-sulfur protein 7, mitochondrial OS=Homo sapiens GN=NDUFS7 PE=1 SV=3
P09622	DLD	Dihydrolipoyl dehydrogenase, mitochondrial	-0.377624	-0.212881	-0.292902		13.042	14.301	115	143	12	12	12	12	864730000	930260000	3159200000	4116900000	37.1	>sp|P09622|DLDH_HUMAN Dihydrolipoyl dehydrogenase, mitochondrial OS=Homo sapiens GN=DLD PE=1 SV=2
P55061	TMBIM6	Bax inhibitor 1	-0.553066	-0.0724488	-0.292835		19.524	12.722	15	10	3	3	3	3	14095000	17735000	50307000	54851000	9.3	>sp|P55061|BI1_HUMAN Bax inhibitor 1 OS=Homo sapiens GN=TMBIM6 PE=1 SV=2
P02794	FTH1	Ferritin heavy chain	-0.247685	-0.338225	-0.292245		50.173	27.707	80	93	9	11	9	11	388750000	382800000	1590300000	2300300000	67.2	>sp|P02794|FRIH_HUMAN Ferritin heavy chain OS=Homo sapiens GN=FTH1 PE=1 SV=2
P49207	RPL34	60S ribosomal protein L34	-0.508936	-0.102725	-0.291581		21.377	22.645	22	35	5	5	5	5	165390000	211640000	1358700000	1676900000	36.8	>sp|P49207|RL34_HUMAN 60S ribosomal protein L34 OS=Homo sapiens GN=RPL34 PE=1 SV=3
P13473	LAMP2	Lysosome-associated membrane glycoprotein 2	-0.315334	-0.268075	-0.291511		9.1891	36.599	52	40	5	7	5	7	393180000	377500000	1347300000	1892000000	22.9	>sp|P13473|LAMP2_HUMAN Lysosome-associated membrane glycoprotein 2 OS=Homo sapiens GN=LAMP2 PE=1 SV=2
P43378	PTPN9	Tyrosine-protein phosphatase non-receptor type 9	-0.16337	-0.430714	-0.290858		47.233	9.8251	3	4	2	2	2	2	1370700	1210200	4141900	6610200	6.7	>sp|P43378|PTN9_HUMAN Tyrosine-protein phosphatase non-receptor type 9 OS=Homo sapiens GN=PTPN9 PE=1 SV=1
Q9Y3D9	MRPS23	28S ribosomal protein S23, mitochondrial	-0.29678	-0.284396	-0.290575		18.705	14.042	50	50	11	8	11	8	115870000	133680000	298490000	423700000	63.7	>sp|Q9Y3D9|RT23_HUMAN 28S ribosomal protein S23, mitochondrial OS=Homo sapiens GN=MRPS23 PE=1 SV=2
P82932	MRPS6	28S ribosomal protein S6, mitochondrial	-0.233152	-0.350271	-0.290523		28.028	28.606	24	27	7	6	7	6	41515000	39819000	167950000	220760000	64.8	>sp|P82932|RT06_HUMAN 28S ribosomal protein S6, mitochondrial OS=Homo sapiens GN=MRPS6 PE=1 SV=3
Q7Z3C6	ATG9A	Autophagy-related protein 9A	-0.524666	-0.0890913	-0.290502		26.755	22.092	10	21	7	10	7	10	5480100	14311000	44494000	45568000	16.9	>sp|Q7Z3C6|ATG9A_HUMAN Autophagy-related protein 9A OS=Homo sapiens GN=ATG9A PE=1 SV=3
Q9Y3Q3	TMED3	Transmembrane emp24 domain-containing protein 3	-0.542902	-0.0724488	-0.288583		29.81	16.376	5	8	3	3	3	3	3612500	4288600	25727000	26938000	18.9	>sp|Q9Y3Q3|TMED3_HUMAN Transmembrane emp24 domain-containing protein 3 OS=Homo sapiens GN=TMED3 PE=1 SV=1
P11310	ACADM	Medium-chain specific acyl-CoA dehydrogenase, mitochondrial	-0.43328	-0.157044	-0.28856		43.97	23.897	95	123	19	18	19	18	371480000	423330000	1342500000	1699000000	52.3	>sp|P11310|ACADM_HUMAN Medium-chain specific acyl-CoA dehydrogenase, mitochondrial OS=Homo sapiens GN=ACADM PE=1 SV=1
P51553	IDH3G	Isocitrate dehydrogenase [NAD] subunit gamma, mitochondrial	-0.379399	-0.202888	-0.288446		17.065	24.609	60	54	10	10	10	10	188240000	216410000	282670000	367770000	46.1	>sp|P51553|IDH3G_HUMAN Isocitrate dehydrogenase [NAD] subunit gamma, mitochondrial OS=Homo sapiens GN=IDH3G PE=1 SV=1
P13746	HLA-A	HLA class I histocompatibility antigen, A-11 alpha chain	-0.360308	-0.219711	-0.288297		25.095	19.674	28	24	8	9	4	3	41469000	52790000	81173000	100730000	41.1	>sp|P13746|1A11_HUMAN HLA class I histocompatibility antigen, A-11 alpha chain OS=Homo sapiens GN=HLA-A PE=1 SV=1;>sp|P04439|1A03_HUMAN HLA class I histocompatibility antigen, A-3 alpha chain OS=Homo sapiens GN=HLA-A PE=1 SV=2;>sp|P30455|1A36_HUMAN HLA cla
Q96TC7	RMDN3	Regulator of microtubule dynamics protein 3	-0.532666	-0.0790197	-0.288085		32.058	31.355	63	36	14	11	14	11	76478000	94309000	384310000	388300000	40	>sp|Q96TC7|RMD3_HUMAN Regulator of microtubule dynamics protein 3 OS=Homo sapiens GN=RMDN3 PE=1 SV=2
Q9H1E5	TMX4	Thioredoxin-related transmembrane protein 4	-0.545277	-0.0684644	-0.287261		7.1393	22.867	5	8	3	2	3	2	66028000	18097000	18264000	21441000	10.9	>sp|Q9H1E5|TMX4_HUMAN Thioredoxin-related transmembrane protein 4 OS=Homo sapiens GN=TMX4 PE=1 SV=1
Q9NZ43	USE1	Vesicle transport protein USE1	-0.373286	-0.205518	-0.286965		18.859	70.263	12	13	7	7	7	7	13033000	14793000	44618000	69671000	28.6	>sp|Q9NZ43|USE1_HUMAN Vesicle transport protein USE1 OS=Homo sapiens GN=USE1 PE=1 SV=2
Q93050	ATP6V0A1	V-type proton ATPase 116 kDa subunit a isoform 1	-0.413269	-0.170053	-0.286542		32.07	17.808	86	74	18	18	17	16	155750000	177830000	356560000	451930000	32.1	>sp|Q93050|VPP1_HUMAN V-type proton ATPase 116 kDa subunit a isoform 1 OS=Homo sapiens GN=ATP6V0A1 PE=1 SV=3
Q15758	SLC1A5	Neutral amino acid transporter B(0)	-0.464982	-0.126709	-0.285953		13.369	16.392	55	74	7	8	7	8	122710000	143170000	598710000	747660000	24.8	>sp|Q15758|AAAT_HUMAN Neutral amino acid transporter B(0) OS=Homo sapiens GN=SLC1A5 PE=1 SV=2
Q99571	P2RX4	P2X purinoceptor 4	-0.251689	-0.320773	-0.285818		18.277	31.986	12	16	3	5	3	5	25895000	30306000	52228000	63475000	22.9	>sp|Q99571|P2RX4_HUMAN P2X purinoceptor 4 OS=Homo sapiens GN=P2RX4 PE=1 SV=2
O43264	ZW10	Centromere/kinetochore protein zw10 homolog	-0.422018	-0.160662	-0.28543		19.107	18.255	60	77	18	22	18	22	79480000	81445000	216700000	260950000	44.3	>sp|O43264|ZW10_HUMAN Centromere/kinetochore protein zw10 homolog OS=Homo sapiens GN=ZW10 PE=1 SV=3
Q9Y3A4	RRP7A	Ribosomal RNA-processing protein 7 homolog A	-0.237074	-0.335026	-0.285219		20.876	17.773	20	20	6	5	6	5	13323000	13533000	52938000	70648000	30.4	>sp|Q9Y3A4|RRP7A_HUMAN Ribosomal RNA-processing protein 7 homolog A OS=Homo sapiens GN=RRP7A PE=1 SV=2
Q9BZF1	OSBPL8	Oxysterol-binding protein-related protein 8	-0.451541	-0.135798	-0.285048		23.318	24.854	52	58	13	16	13	16	63567000	80117000	222930000	264280000	28.7	>sp|Q9BZF1|OSBL8_HUMAN Oxysterol-binding protein-related protein 8 OS=Homo sapiens GN=OSBPL8 PE=1 SV=3
O76031	CLPX	ATP-dependent Clp protease ATP-binding subunit clpX-like, mitochondrial	-0.408712	-0.169925	-0.284384		19.435	29.952	107	94	23	20	23	20	214670000	331330000	519970000	654160000	55.6	>sp|O76031|CLPX_HUMAN ATP-dependent Clp protease ATP-binding subunit clpX-like, mitochondrial OS=Homo sapiens GN=CLPX PE=1 SV=2
P35670	ATP7B	Copper-transporting ATPase 2	-0.573859	-0.0422242	-0.283691		13.834	19.928	2	7	2	3	2	3	947890	1356400	14669000	15400000	3	>sp|P35670|ATP7B_HUMAN Copper-transporting ATPase 2 OS=Homo sapiens GN=ATP7B PE=1 SV=4
Q7L3T8	PARS2	Probable proline--tRNA ligase, mitochondrial	-0.417272	-0.161049	-0.28348		13.032	21.334	33	23	10	9	10	9	37601000	45467000	89260000	108030000	33.5	>sp|Q7L3T8|SYPM_HUMAN Probable proline--tRNA ligase, mitochondrial OS=Homo sapiens GN=PARS2 PE=1 SV=1
Q8IZL8	PELP1	Proline-, glutamic acid- and leucine-rich protein 1	-0.430178	-0.149519	-0.283035		17.562	24.425	85	58	14	14	14	14	139210000	161910000	204130000	259430000	27.6	>sp|Q8IZL8|PELP1_HUMAN Proline-, glutamic acid- and leucine-rich protein 1 OS=Homo sapiens GN=PELP1 PE=1 SV=2
P82673	MRPS35	28S ribosomal protein S35, mitochondrial	-0.252052	-0.313478	-0.282438		22.605	12.059	51	32	13	11	13	11	110700000	120270000	142510000	179600000	52.9	>sp|P82673|RT35_HUMAN 28S ribosomal protein S35, mitochondrial OS=Homo sapiens GN=MRPS35 PE=1 SV=1
Q9H0X4	ITFG3	Protein ITFG3	-0.217851	-0.348799	-0.28184		42.411	31.416	9	7	4	4	4	4	4268500	5286500	28672000	19214000	19.4	>sp|Q9H0X4|ITFG3_HUMAN Protein ITFG3 OS=Homo sapiens GN=ITFG3 PE=1 SV=1
P48735	IDH2	Isocitrate dehydrogenase [NADP], mitochondrial	-0.30147	-0.262072	-0.281637		50.863	19.752	285	292	25	22	25	22	2459800000	2871200000	6542600000	8642600000	55.1	>sp|P48735|IDHP_HUMAN Isocitrate dehydrogenase [NADP], mitochondrial OS=Homo sapiens GN=IDH2 PE=1 SV=2
Q7L8L6	FASTKD5	FAST kinase domain-containing protein 5	-0.642471	0.00685457	-0.281581		41.654	16.087	37	78	12	17	12	17	51987000	73092000	267950000	282910000	38	>sp|Q7L8L6|FAKD5_HUMAN FAST kinase domain-containing protein 5 OS=Homo sapiens GN=FASTKD5 PE=1 SV=1
Q9BVC6	TMEM109	Transmembrane protein 109	-0.521553	-0.0754641	-0.281335		73.647	45.72	20	35	2	4	2	4	651990000	840280000	1823300000	2211200000	12.8	>sp|Q9BVC6|TM109_HUMAN Transmembrane protein 109 OS=Homo sapiens GN=TMEM109 PE=1 SV=1
Q01082	SPTBN1	Spectrin beta chain, non-erythrocytic 1	-0.362554	-0.204016	-0.281108		24.661	20.198	1889	1871	165	147	151	136	16431000000	17869000000	44810000000	58108000000	72.2	>sp|Q01082|SPTB2_HUMAN Spectrin beta chain, non-erythrocytic 1 OS=Homo sapiens GN=SPTBN1 PE=1 SV=2
P48509	CD151	CD151 antigen	-0.36446	-0.202136	-0.281016		15.444	23.778	15	17	2	4	2	4	31453000	37808000	210560000	315260000	14.2	>sp|P48509|CD151_HUMAN CD151 antigen OS=Homo sapiens GN=CD151 PE=1 SV=3
Q6IQ22	RAB12	Ras-related protein Rab-12	-0.306029	-0.256286	-0.280943		26.413	23.109	4	13	3	4	3	4	5516000	5779100	15578000	17833000	19.7	>sp|Q6IQ22|RAB12_HUMAN Ras-related protein Rab-12 OS=Homo sapiens GN=RAB12 PE=1 SV=3
Q6KCM7	SLC25A25	Calcium-binding mitochondrial carrier protein SCaMC-2	-0.743644	0.0690734	-0.280798		8.1126	9.7912	8	4	3	3	3	3	3129300	4846200	6952500	9003800	14.1	>sp|Q6KCM7|SCMC2_HUMAN Calcium-binding mitochondrial carrier protein SCaMC-2 OS=Homo sapiens GN=SLC25A25 PE=1 SV=1
P53597	SUCLG1	Succinyl-CoA ligase [ADP/GDP-forming] subunit alpha, mitochondrial	-0.337654	-0.226015	-0.280755		15.443	27.733	62	53	7	9	7	9	305250000	331470000	693270000	878020000	36.7	>sp|P53597|SUCA_HUMAN Succinyl-CoA ligase [ADP/GDP-forming] subunit alpha, mitochondrial OS=Homo sapiens GN=SUCLG1 PE=1 SV=4
Q9NQ84	GPRC5C	G-protein coupled receptor family C group 5 member C	-0.359296	-0.205017	-0.280095		10.668	15.411	9	16	5	5	5	5	21185000	19144000	60945000	77372000	14.5	>sp|Q9NQ84|GPC5C_HUMAN G-protein coupled receptor family C group 5 member C OS=Homo sapiens GN=GPRC5C PE=1 SV=2
Q9Y2R9	MRPS7	28S ribosomal protein S7, mitochondrial	-0.303225	-0.256165	-0.279504		26.484	18.186	86	51	13	13	13	13	154070000	162030000	411140000	528260000	55	>sp|Q9Y2R9|RT07_HUMAN 28S ribosomal protein S7, mitochondrial OS=Homo sapiens GN=MRPS7 PE=1 SV=2
Q9C0B5	ZDHHC5	Palmitoyltransferase ZDHHC5	-0.332164	-0.228603	-0.279454		25.474	22.042	35	33	10	10	10	10	53798000	51392000	132540000	161400000	28.1	>sp|Q9C0B5|ZDHC5_HUMAN Palmitoyltransferase ZDHHC5 OS=Homo sapiens GN=ZDHHC5 PE=1 SV=2
O00186	STXBP3	Syntaxin-binding protein 3	-0.287236	-0.271545	-0.279369		21.294	25.982	30	37	10	13	10	13	24164000	26186000	101300000	117270000	33.8	>sp|O00186|STXB3_HUMAN Syntaxin-binding protein 3 OS=Homo sapiens GN=STXBP3 PE=1 SV=2
Q8NBJ5	COLGALT1	Procollagen galactosyltransferase 1	-0.302992	-0.256045	-0.279327		19.51	28.485	90	100	20	19	20	19	253770000	288460000	760100000	1026200000	35.2	>sp|Q8NBJ5|GT251_HUMAN Procollagen galactosyltransferase 1 OS=Homo sapiens GN=COLGALT1 PE=1 SV=1
O95674	CDS2	Phosphatidate cytidylyltransferase 2	-0.723428	0.0606832	-0.278744		19.575	13.311	12	14	4	3	4	3	16552000	21153000	112370000	133860000	14.2	>sp|O95674|CDS2_HUMAN Phosphatidate cytidylyltransferase 2 OS=Homo sapiens GN=CDS2 PE=1 SV=1
O43795	MYO1B	Unconventional myosin-Ib	-0.248778	-0.30906	-0.278604		19.721	27.841	235	228	40	42	37	39	545480000	568350000	1681900000	2214600000	45.5	>sp|O43795|MYO1B_HUMAN Unconventional myosin-Ib OS=Homo sapiens GN=MYO1B PE=1 SV=3
Q96JB5	CDK5RAP3	CDK5 regulatory subunit-associated protein 3	-0.424385	-0.145743	-0.278347		14.11	16.218	66	80	16	17	16	17	101390000	109600000	439530000	516250000	41.9	>sp|Q96JB5|CK5P3_HUMAN CDK5 regulatory subunit-associated protein 3 OS=Homo sapiens GN=CDK5RAP3 PE=1 SV=2
P23677	ITPKA	Inositol-trisphosphate 3-kinase A	-0.393746	-0.170822	-0.277983		17.156	14.278	12	29	6	9	6	9	8998600	10087000	58601000	68154000	27.5	>sp|P23677|IP3KA_HUMAN Inositol-trisphosphate 3-kinase A OS=Homo sapiens GN=ITPKA PE=1 SV=1
P16435	POR	NADPH--cytochrome P450 reductase	-0.449641	-0.124461	-0.277908		24.266	17.821	403	302	43	36	43	36	1410300000	1681000000	3170800000	3935400000	67.4	>sp|P16435|NCPR_HUMAN NADPH--cytochrome P450 reductase OS=Homo sapiens GN=POR PE=1 SV=2
Q8NET6	CHST13	Carbohydrate sulfotransferase 13	-0.294547	-0.260989	-0.277671		18.137	16.353	10	14	7	5	7	5	14474000	20763000	52655000	62310000	29.9	>sp|Q8NET6|CHSTD_HUMAN Carbohydrate sulfotransferase 13 OS=Homo sapiens GN=CHST13 PE=2 SV=1
Q13286	CLN3	Battenin	-0.506399	-0.0801119	-0.277567		18.073	12.433	12	6	5	2	5	2	4047900	5013600	25054000	27765000	15.1	>sp|Q13286|CLN3_HUMAN Battenin OS=Homo sapiens GN=CLN3 PE=1 SV=1
Q5T1C6	THEM4	Acyl-coenzyme A thioesterase THEM4	-0.255078	-0.299831	-0.277281		12.692	26.805	8	20	5	6	5	6	10451000	9924000	60990000	79673000	29.2	>sp|Q5T1C6|THEM4_HUMAN Acyl-coenzyme A thioesterase THEM4 OS=Homo sapiens GN=THEM4 PE=1 SV=1
Q9Y2Q9	MRPS28	28S ribosomal protein S28, mitochondrial	-0.268794	-0.285816	-0.27728		15.56	11.086	27	24	6	4	6	4	49126000	53766000	123370000	169170000	42.8	>sp|Q9Y2Q9|RT28_HUMAN 28S ribosomal protein S28, mitochondrial OS=Homo sapiens GN=MRPS28 PE=1 SV=1
O75323	GBAS	Protein NipSnap homolog 2	-0.336398	-0.219463	-0.276746		24.209	12.215	28	27	5	8	5	8	79844000	92893000	200680000	259350000	34.6	>sp|O75323|NIPS2_HUMAN Protein NipSnap homolog 2 OS=Homo sapiens GN=GBAS PE=1 SV=1
O75880	SCO1	Protein SCO1 homolog, mitochondrial	-0.389457	-0.171719	-0.276484		13.92	12.949	13	6	2	4	2	4	27143000	32478000	58176000	91929000	9.3	>sp|O75880|SCO1_HUMAN Protein SCO1 homolog, mitochondrial OS=Homo sapiens GN=SCO1 PE=1 SV=1
P62906	RPL10A	60S ribosomal protein L10a	-0.588133	-0.0201999	-0.276398		28.746	12.784	149	156	11	9	11	9	1413800000	1828200000	5591200000	6359500000	44.7	>sp|P62906|RL10A_HUMAN 60S ribosomal protein L10a OS=Homo sapiens GN=RPL10A PE=1 SV=2
Q96DV4	MRPL38	39S ribosomal protein L38, mitochondrial	-0.260869	-0.291721	-0.276213		21.947	28.389	46	42	11	14	11	14	115480000	114570000	157110000	231860000	42.6	>sp|Q96DV4|RM38_HUMAN 39S ribosomal protein L38, mitochondrial OS=Homo sapiens GN=MRPL38 PE=1 SV=2
Q8IXM3	MRPL41	39S ribosomal protein L41, mitochondrial	-0.171207	-0.389016	-0.276005		33.355	16.049	27	24	5	4	5	4	53969000	54787000	77920000	108480000	52.6	>sp|Q8IXM3|RM41_HUMAN 39S ribosomal protein L41, mitochondrial OS=Homo sapiens GN=MRPL41 PE=1 SV=1
Q9H061	TMEM126A	Transmembrane protein 126A	-0.343806	-0.208642	-0.274641		28.961	20.853	74	29	9	9	9	9	76844000	93333000	176010000	226930000	44.1	>sp|Q9H061|T126A_HUMAN Transmembrane protein 126A OS=Homo sapiens GN=TMEM126A PE=1 SV=1
P18124	RPL7	60S ribosomal protein L7	-0.535257	-0.0539454	-0.274622		38.409	15.822	167	174	16	14	16	14	1236300000	1510800000	5087300000	5894000000	54.4	>sp|P18124|RL7_HUMAN 60S ribosomal protein L7 OS=Homo sapiens GN=RPL7 PE=1 SV=1
P36578	RPL4	60S ribosomal protein L4	-0.523763	-0.0618453	-0.274396		23.391	24.75	250	234	23	20	23	20	2340700000	2740900000	7946200000	9298600000	46.1	>sp|P36578|RL4_HUMAN 60S ribosomal protein L4 OS=Homo sapiens GN=RPL4 PE=1 SV=5
Q6UX07	DHRS13	Dehydrogenase/reductase SDR family member 13	-0.438719	-0.126577	-0.274222		35.435	8.9017	7	4	4	2	4	2	5119700	6045400	5252300	6428300	19.1	>sp|Q6UX07|DHR13_HUMAN Dehydrogenase/reductase SDR family member 13 OS=Homo sapiens GN=DHRS13 PE=2 SV=1
Q8TDN6	BRIX1	Ribosome biogenesis protein BRX1 homolog	-0.405448	-0.153157	-0.273794		33.219	39.38	36	30	16	11	16	11	72929000	85668000	220030000	275750000	61.2	>sp|Q8TDN6|BRX1_HUMAN Ribosome biogenesis protein BRX1 homolog OS=Homo sapiens GN=BRIX1 PE=1 SV=2
Q9HDC9	APMAP	Adipocyte plasma membrane-associated protein	-0.350837	-0.200128	-0.273515		38.48	34.859	127	149	15	17	15	17	616530000	710810000	2230400000	2674300000	51.9	>sp|Q9HDC9|APMAP_HUMAN Adipocyte plasma membrane-associated protein OS=Homo sapiens GN=APMAP PE=1 SV=2
Q02543	RPL18A	60S ribosomal protein L18a	-0.482539	-0.090718	-0.273367		26.004	15.213	43	44	7	7	7	7	213890000	312080000	1166600000	1491600000	35.2	>sp|Q02543|RL18A_HUMAN 60S ribosomal protein L18a OS=Homo sapiens GN=RPL18A PE=1 SV=2
Q9NXF1	TEX10	Testis-expressed sequence 10 protein	-0.237686	-0.309526	-0.273159		18.387	15.061	56	52	14	17	14	17	59279000	62267000	148910000	218080000	27.4	>sp|Q9NXF1|TEX10_HUMAN Testis-expressed sequence 10 protein OS=Homo sapiens GN=TEX10 PE=1 SV=2
Q96RT1	ERBB2IP	Protein LAP2	-0.238787	-0.308244	-0.273098		36.637	34.802	14	10	5	6	5	6	17274000	17091000	13182000	19450000	8.5	>sp|Q96RT1|LAP2_HUMAN Protein LAP2 OS=Homo sapiens GN=ERBB2IP PE=1 SV=2
Q96HV5	TMEM41A	Transmembrane protein 41A	-0.554442	-0.0374525	-0.272912		13.257	19.544	5	9	2	3	2	3	6488600	8163600	46946000	52912000	18.2	>sp|Q96HV5|TM41A_HUMAN Transmembrane protein 41A OS=Homo sapiens GN=TMEM41A PE=2 SV=1
Q9NZB2	FAM120A	Constitutive coactivator of PPAR-gamma-like protein 1	-0.517225	-0.0639171	-0.27284		19.881	19.604	101	116	28	29	28	29	241040000	203720000	548800000	618120000	39.2	>sp|Q9NZB2|F120A_HUMAN Constitutive coactivator of PPAR-gamma-like protein 1 OS=Homo sapiens GN=FAM120A PE=1 SV=2
O75600	GCAT	2-amino-3-ketobutyrate coenzyme A ligase, mitochondrial	-0.329985	-0.214249	-0.270957		23.308	21.562	40	53	7	9	7	9	45284000	59325000	191780000	248790000	37	>sp|O75600|KBL_HUMAN 2-amino-3-ketobutyrate coenzyme A ligase, mitochondrial OS=Homo sapiens GN=GCAT PE=1 SV=1
O14967	CLGN	Calmegin	-0.325387	-0.217603	-0.270488		19.533	17.207	111	117	17	20	17	20	221690000	242640000	475820000	573000000	48.9	>sp|O14967|CLGN_HUMAN Calmegin OS=Homo sapiens GN=CLGN PE=1 SV=1
Q9BZE4	GTPBP4	Nucleolar GTP-binding protein 1	-0.426855	-0.129085	-0.270301		19.703	15.798	64	71	18	23	18	23	83108000	91065000	328120000	394350000	46.4	>sp|Q9BZE4|NOG1_HUMAN Nucleolar GTP-binding protein 1 OS=Homo sapiens GN=GTPBP4 PE=1 SV=3
Q71UM5	RPS27L	40S ribosomal protein S27-like	-0.476123	-0.0892269	-0.269744		16.502	19.977	14	14	3	2	3	2	22198000	28564000	185450000	218900000	40.5	>sp|Q71UM5|RS27L_HUMAN 40S ribosomal protein S27-like OS=Homo sapiens GN=RPS27L PE=1 SV=3
Q9NW81	ATP5SL	ATP synthase subunit s-like protein	-0.330673	-0.210763	-0.269473		19.97	125.14	20	8	4	3	4	3	12716000	13987000	53008000	22400000	21.4	>sp|Q9NW81|AT5SL_HUMAN ATP synthase subunit s-like protein OS=Homo sapiens GN=ATP5SL PE=2 SV=3
Q9H270	VPS11	Vacuolar protein sorting-associated protein 11 homolog	-0.660107	0.0379323	-0.269275		15.804	18.726	4	10	4	5	4	5	3563500	4889100	21923000	20942000	9.8	>sp|Q9H270|VPS11_HUMAN Vacuolar protein sorting-associated protein 11 homolog OS=Homo sapiens GN=VPS11 PE=1 SV=1
Q9NUM4	TMEM106B	Transmembrane protein 106B	-0.387914	-0.159629	-0.269261		14.709	18.806	6	13	2	4	2	4	9545600	10825000	65126000	90018000	19	>sp|Q9NUM4|T106B_HUMAN Transmembrane protein 106B OS=Homo sapiens GN=TMEM106B PE=1 SV=2
Q8WUY1	THEM6	Protein THEM6	-0.355242	-0.188021	-0.26921		55.016	35.579	12	12	5	5	5	5	17593000	17990000	29570000	39874000	35.6	>sp|Q8WUY1|THEM6_HUMAN Protein THEM6 OS=Homo sapiens GN=THEM6 PE=1 SV=2
P12429	ANXA3	Annexin A3	-0.742955	0.0869516	-0.269132		15.645	32.553	96	71	19	15	19	15	291000000	432490000	566060000	592110000	68.7	>sp|P12429|ANXA3_HUMAN Annexin A3 OS=Homo sapiens GN=ANXA3 PE=1 SV=3
Q9BRT2	MNF1	Mitochondrial nucleoid factor 1	-0.248778	-0.28948	-0.268986		14.104	16.744	31	31	5	6	5	6	140590000	136670000	140740000	189270000	55.6	>sp|Q9BRT2|MNF1_HUMAN Mitochondrial nucleoid factor 1 OS=Homo sapiens GN=MNF1 PE=1 SV=1
O43674	NDUFB5	NADH dehydrogenase [ubiquinone] 1 beta subcomplex subunit 5, mitochondrial	-0.233643	-0.303693	-0.268243		43.856	13.257	20	13	4	6	4	6	47482000	49880000	49571000	56493000	23.3	>sp|O43674|NDUB5_HUMAN NADH dehydrogenase [ubiquinone] 1 beta subcomplex subunit 5, mitochondrial OS=Homo sapiens GN=NDUFB5 PE=1 SV=1
Q7L9B9	EEPD1	Endonuclease/exonuclease/phosphatase family domain-containing protein 1	-0.318114	-0.219958	-0.268202		20.201	18.887	14	17	6	6	6	6	13263000	11638000	33639000	45479000	17.9	>sp|Q7L9B9|EEPD1_HUMAN Endonuclease/exonuclease/phosphatase family domain-containing protein 1 OS=Homo sapiens GN=EEPD1 PE=1 SV=2
Q15599	SLC9A3R2	Na(+)/H(+) exchange regulatory cofactor NHE-RF2	-0.186501	-0.354565	-0.268087		41.253	18.016	18	27	8	11	8	11	23879000	21674000	74208000	97674000	38.9	>sp|Q15599|NHRF2_HUMAN Na(+)/H(+) exchange regulatory cofactor NHE-RF2 OS=Homo sapiens GN=SLC9A3R2 PE=1 SV=2
Q7Z7F7	MRPL55	39S ribosomal protein L55, mitochondrial	-0.207893	-0.330788	-0.268032		22.658	16.922	18	15	5	4	5	4	25418000	28115000	31090000	42960000	37.5	>sp|Q7Z7F7|RM55_HUMAN 39S ribosomal protein L55, mitochondrial OS=Homo sapiens GN=MRPL55 PE=1 SV=1
Q9NYU2	UGGT1	UDP-glucose:glycoprotein glucosyltransferase 1	-0.256769	-0.278936	-0.26781		28.819	16.83	341	379	60	53	58	52	879640000	922970000	2650000000	3570000000	54.6	>sp|Q9NYU2|UGGG1_HUMAN UDP-glucose:glycoprotein glucosyltransferase 1 OS=Homo sapiens GN=UGGT1 PE=1 SV=3
P32189	GK	Glycerol kinase	-0.392317	-0.152638	-0.267506		32.813	19.749	22	20	8	8	8	8	13374000	17903000	38348000	40383000	31.7	>sp|P32189|GLPK_HUMAN Glycerol kinase OS=Homo sapiens GN=GK PE=1 SV=3;>sp|Q14409|GLPK3_HUMAN Putative glycerol kinase 3 OS=Homo sapiens GN=GK3P PE=5 SV=2
Q9H089	LSG1	Large subunit GTPase 1 homolog	-0.45133	-0.104337	-0.267426		29.658	17.448	11	34	8	14	8	14	7969800	9851200	77278000	93130000	30.9	>sp|Q9H089|LSG1_HUMAN Large subunit GTPase 1 homolog OS=Homo sapiens GN=LSG1 PE=1 SV=2
Q15165	PON2	Serum paraoxonase/arylesterase 2	-0.372061	-0.169668	-0.267318		18.556	15.597	159	127	12	10	12	10	997540000	1121800000	2056300000	2608200000	56.8	>sp|Q15165|PON2_HUMAN Serum paraoxonase/arylesterase 2 OS=Homo sapiens GN=PON2 PE=1 SV=3
Q9Y2Q5	LAMTOR2	Ragulator complex protein LAMTOR2	-0.264476	-0.269751	-0.267112		16.15	11.368	26	10	7	5	7	5	32914000	33578000	44824000	54127000	90.4	>sp|Q9Y2Q5|LTOR2_HUMAN Ragulator complex protein LAMTOR2 OS=Homo sapiens GN=LAMTOR2 PE=1 SV=1
Q6PD62	CTR9	RNA polymerase-associated protein CTR9 homolog	-0.175301	-0.364909	-0.266992		27.589	19.745	28	35	15	16	15	16	39863000	39770000	115080000	173640000	24	>sp|Q6PD62|CTR9_HUMAN RNA polymerase-associated protein CTR9 homolog OS=Homo sapiens GN=CTR9 PE=1 SV=1
Q9Y679	AUP1	Ancient ubiquitous protein 1	-0.406537	-0.139601	-0.266904		36.143	16.499	34	38	8	5	8	5	47438000	56649000	213020000	256380000	18.1	>sp|Q9Y679|AUP1_HUMAN Ancient ubiquitous protein 1 OS=Homo sapiens GN=AUP1 PE=1 SV=1
Q9H6R3	ACSS3	Acyl-CoA synthetase short-chain family member 3, mitochondrial	-0.589188	-0.00144202	-0.265589		16.309	16.235	79	90	20	19	20	18	193090000	267890000	682140000	748510000	43.1	>sp|Q9H6R3|ACSS3_HUMAN Acyl-CoA synthetase short-chain family member 3, mitochondrial OS=Homo sapiens GN=ACSS3 PE=1 SV=1
Q9UIW2	PLXNA1	Plexin-A1	-0.294194	-0.237441	-0.265539		18.915	16.845	10	21	5	8	4	6	10696000	11521000	294360000	351040000	7.1	>sp|Q9UIW2|PLXA1_HUMAN Plexin-A1 OS=Homo sapiens GN=PLXNA1 PE=1 SV=3
Q9UHG3	PCYOX1	Prenylcysteine oxidase 1	-0.277866	-0.252779	-0.265268		16.292	16.738	118	117	16	15	16	15	315090000	355320000	1040400000	1402700000	48.5	>sp|Q9UHG3|PCYOX_HUMAN Prenylcysteine oxidase 1 OS=Homo sapiens GN=PCYOX1 PE=1 SV=3
Q02878	RPL6	60S ribosomal protein L6	-0.56179	-0.0193461	-0.265223		18.7	30.15	161	168	14	14	14	14	1246200000	1553700000	5543700000	6235900000	42.4	>sp|Q02878|RL6_HUMAN 60S ribosomal protein L6 OS=Homo sapiens GN=RPL6 PE=1 SV=3
Q9ULU4	ZMYND8	Protein kinase C-binding protein 1	-0.224534	-0.307079	-0.265216		46.197	19.968	37	32	15	13	15	13	84208000	229170000	75668000	141750000	22.4	>sp|Q9ULU4|PKCB1_HUMAN Protein kinase C-binding protein 1 OS=Homo sapiens GN=ZMYND8 PE=1 SV=2
Q8WYP5	AHCTF1	Protein ELYS	-0.350724	-0.183709	-0.264801		23.075	23.37	89	97	33	33	33	33	87791000	96510000	744710000	318020000	29.7	>sp|Q8WYP5|ELYS_HUMAN Protein ELYS OS=Homo sapiens GN=AHCTF1 PE=1 SV=3
P61006	RAB8A	Ras-related protein Rab-8A	-0.346418	-0.186247	-0.264111		24.006	11.476	52	54	7	8	5	5	126380000	143210000	529190000	676640000	53.1	>sp|P61006|RAB8A_HUMAN Ras-related protein Rab-8A OS=Homo sapiens GN=RAB8A PE=1 SV=1
Q8N5M9	JAGN1	Protein jagunal homolog 1	-0.442227	-0.104739	-0.263637		22.95	21.53	15	36	3	4	3	4	80959000	93530000	676940000	831160000	24	>sp|Q8N5M9|JAGN1_HUMAN Protein jagunal homolog 1 OS=Homo sapiens GN=JAGN1 PE=1 SV=1
Q9NXW2	DNAJB12	DnaJ homolog subfamily B member 12	-0.244278	-0.282143	-0.263086		20.293	23.191	21	18	7	8	7	8	32048000	33736000	46538000	58736000	30.7	>sp|Q9NXW2|DJB12_HUMAN DnaJ homolog subfamily B member 12 OS=Homo sapiens GN=DNAJB12 PE=1 SV=4
P10515	DLAT	Dihydrolipoyllysine-residue acetyltransferase component of pyruvate dehydrogenase complex, mitochondrial	-0.332851	-0.195348	-0.262462		24.791	18.636	216	163	22	19	22	19	714630000	787430000	2038100000	2651500000	43.7	>sp|P10515|ODP2_HUMAN Dihydrolipoyllysine-residue acetyltransferase component of pyruvate dehydrogenase complex, mitochondrial OS=Homo sapiens GN=DLAT PE=1 SV=3
O96005	CLPTM1	Cleft lip and palate transmembrane protein 1	-0.56179	-0.0142124	-0.262177		20.612	30.773	101	126	12	17	12	17	407560000	501320000	1201800000	1288300000	36.3	>sp|O96005|CLPT1_HUMAN Cleft lip and palate transmembrane protein 1 OS=Homo sapiens GN=CLPTM1 PE=1 SV=1
Q9H6V9	C2orf43	UPF0554 protein C2orf43	-0.352646	-0.176323	-0.261792		31.926	14.571	11	6	5	4	5	4	16518000	19690000	40125000	55924000	21.8	>sp|Q9H6V9|CB043_HUMAN UPF0554 protein C2orf43 OS=Homo sapiens GN=C2orf43 PE=1 SV=1
P78381	SLC35A2	UDP-galactose translocator	-0.571143	-0.00719552	-0.261787		47.717	19.723	5	10	2	3	2	3	9834600	11992000	92833000	91664000	13.1	>sp|P78381|S35A2_HUMAN UDP-galactose translocator OS=Homo sapiens GN=SLC35A2 PE=2 SV=1
P82930	MRPS34	28S ribosomal protein S34, mitochondrial	-0.191057	-0.335369	-0.261409		17.1	28.515	42	30	9	10	9	10	83333000	83856000	121080000	163890000	57.8	>sp|P82930|RT34_HUMAN 28S ribosomal protein S34, mitochondrial OS=Homo sapiens GN=MRPS34 PE=1 SV=2
P02751	FN1	Fibronectin	-0.310805	-0.213378	-0.26127		20.558	25.497	130	113	42	35	42	35	126940000	131470000	320740000	330660000	32.7	>sp|P02751|FINC_HUMAN Fibronectin OS=Homo sapiens GN=FN1 PE=1 SV=4
O75616	ERAL1	GTPase Era, mitochondrial	-0.414352	-0.122076	-0.260825		13.118	16.332	27	30	7	11	7	11	24961000	30866000	102680000	132520000	34.6	>sp|O75616|ERAL1_HUMAN GTPase Era, mitochondrial OS=Homo sapiens GN=ERAL1 PE=1 SV=2
Q9Y2G5	POFUT2	GDP-fucose protein O-fucosyltransferase 2	-0.175301	-0.351289	-0.260613		12.417	19.797	16	15	2	6	2	6	7805900	7390100	169550000	47893000	17.5	>sp|Q9Y2G5|OFUT2_HUMAN GDP-fucose protein O-fucosyltransferase 2 OS=Homo sapiens GN=POFUT2 PE=1 SV=3
Q6UWP7	LCLAT1	Lysocardiolipin acyltransferase 1	-0.45249	-0.0911243	-0.260522		17.036	16.719	20	24	5	7	5	7	26050000	31255000	159260000	173090000	20.5	>sp|Q6UWP7|LCLT1_HUMAN Lysocardiolipin acyltransferase 1 OS=Homo sapiens GN=LCLAT1 PE=1 SV=1
Q9Y4W2	LAS1L	Ribosomal biogenesis protein LAS1L	-0.235114	-0.286172	-0.260417		13.068	21.343	58	56	17	13	17	13	91566000	95556000	180870000	227890000	39.4	>sp|Q9Y4W2|LAS1L_HUMAN Ribosomal biogenesis protein LAS1L OS=Homo sapiens GN=LAS1L PE=1 SV=2
Q6NSJ0	KIAA1161	Uncharacterized family 31 glucosidase KIAA1161	-0.652418	0.0482928	-0.259933		40.694	43.173	3	3	4	2	4	2	1434200	1582500	3084100	3611400	12	>sp|Q6NSJ0|K1161_HUMAN Uncharacterized family 31 glucosidase KIAA1161 OS=Homo sapiens GN=KIAA1161 PE=1 SV=2
Q8TCC3	MRPL30	39S ribosomal protein L30, mitochondrial	-0.229588	-0.290424	-0.259686		12.027	51	6	14	2	2	2	2	15418000	16344000	32338000	41587000	17.4	>sp|Q8TCC3|RM30_HUMAN 39S ribosomal protein L30, mitochondrial OS=Homo sapiens GN=MRPL30 PE=1 SV=1
Q12912	LRMP	Lymphoid-restricted membrane protein	-0.393965	-0.136191	-0.259329		20.703	15.534	6	5	3	4	3	4	5304200	6814400	15333000	21040000	16.4	>sp|Q12912|LRMP_HUMAN Lymphoid-restricted membrane protein OS=Homo sapiens GN=LRMP PE=1 SV=3
O75683	SURF6	Surfeit locus protein 6	-0.266517	-0.252173	-0.259327		14.246	16.449	27	30	7	6	7	6	29321000	29061000	102670000	135980000	25.2	>sp|O75683|SURF6_HUMAN Surfeit locus protein 6 OS=Homo sapiens GN=SURF6 PE=1 SV=3
Q96QZ7	MAGI1	Membrane-associated guanylate kinase, WW and PDZ domain-containing protein 1	-0.090718	-0.449852	-0.259139		4.5738	14.014	3	3	2	2	2	2	1120300	1369400	2497400	6879300	6	>sp|Q96QZ7|MAGI1_HUMAN Membrane-associated guanylate kinase, WW and PDZ domain-containing protein 1 OS=Homo sapiens GN=MAGI1 PE=1 SV=3
Q8N201	INTS1	Integrator complex subunit 1	-0.0775164	-0.466758	-0.259049		24.742	22.476	29	24	10	13	10	13	49728000	53598000	48610000	60383000	14.2	>sp|Q8N201|INT1_HUMAN Integrator complex subunit 1 OS=Homo sapiens GN=INTS1 PE=1 SV=2
P46778	RPL21	60S ribosomal protein L21	-0.590338	0.0102942	-0.258988		22.224	11.807	67	71	9	8	9	8	302740000	359460000	1303700000	1477900000	42.5	>sp|P46778|RL21_HUMAN 60S ribosomal protein L21 OS=Homo sapiens GN=RPL21 PE=1 SV=2
Q13405	MRPL49	39S ribosomal protein L49, mitochondrial	-0.179893	-0.342669	-0.258986		17.782	13.858	34	39	5	7	5	7	55161000	56660000	119870000	159700000	39.8	>sp|Q13405|RM49_HUMAN 39S ribosomal protein L49, mitochondrial OS=Homo sapiens GN=MRPL49 PE=1 SV=1
O95487	SEC24B	Protein transport protein Sec24B	-0.533862	-0.0281449	-0.258957		27.834	18.426	12	20	7	10	7	10	8135600	10451000	36749000	44535000	14.9	>sp|O95487|SC24B_HUMAN Protein transport protein Sec24B OS=Homo sapiens GN=SEC24B PE=1 SV=2
P42694	HELZ	Probable helicase with zinc finger domain	-0.62686	0.0345001	-0.258609		14.859	14.287	5	9	3	4	3	4	2465800	3081500	84084000	96702000	5.4	>sp|P42694|HELZ_HUMAN Probable helicase with zinc finger domain OS=Homo sapiens GN=HELZ PE=1 SV=2
Q02809	PLOD1	Procollagen-lysine,2-oxoglutarate 5-dioxygenase 1	-0.271784	-0.245374	-0.258519		16.476	31.087	62	64	17	15	17	15	108210000	114740000	273530000	363620000	40.9	>sp|Q02809|PLOD1_HUMAN Procollagen-lysine,2-oxoglutarate 5-dioxygenase 1 OS=Homo sapiens GN=PLOD1 PE=1 SV=2
P42285	SKIV2L2	Superkiller viralicidic activity 2-like 2	-0.285106	-0.232047	-0.258333		23.235	22.463	93	107	26	27	26	27	163930000	174080000	455660000	684940000	38.4	>sp|P42285|SK2L2_HUMAN Superkiller viralicidic activity 2-like 2 OS=Homo sapiens GN=SKIV2L2 PE=1 SV=3
P49768	PSEN1	Presenilin-1	-0.288063	-0.229096	-0.258278		57.367	11.598	15	15	3	4	3	4	30030000	33994000	36718000	52553000	15	>sp|P49768|PSN1_HUMAN Presenilin-1 OS=Homo sapiens GN=PSEN1 PE=1 SV=1
O60568	PLOD3	Procollagen-lysine,2-oxoglutarate 5-dioxygenase 3	-0.301822	-0.215492	-0.258011		29.639	22.883	115	114	27	26	27	26	246440000	305130000	747910000	951500000	53.8	>sp|O60568|PLOD3_HUMAN Procollagen-lysine,2-oxoglutarate 5-dioxygenase 3 OS=Homo sapiens GN=PLOD3 PE=1 SV=1
Q15043	SLC39A14	Zinc transporter ZIP14	-0.314987	-0.203139	-0.257979		15.9	23.459	53	44	5	7	5	7	322500000	351320000	800640000	1006600000	21.1	>sp|Q15043|S39AE_HUMAN Zinc transporter ZIP14 OS=Homo sapiens GN=SLC39A14 PE=1 SV=3
Q16795	NDUFA9	NADH dehydrogenase [ubiquinone] 1 alpha subcomplex subunit 9, mitochondrial	-0.587365	0.0105413	-0.257657		16.224	16.379	46	52	10	8	10	8	59804000	80334000	385320000	404370000	36.6	>sp|Q16795|NDUA9_HUMAN NADH dehydrogenase [ubiquinone] 1 alpha subcomplex subunit 9, mitochondrial OS=Homo sapiens GN=NDUFA9 PE=1 SV=2
Q8IY81	FTSJ3	pre-rRNA processing protein FTSJ3	-0.387032	-0.138552	-0.257449		18.197	20.519	123	152	23	22	23	22	292950000	372250000	919980000	946700000	44.7	>sp|Q8IY81|SPB1_HUMAN pre-rRNA processing protein FTSJ3 OS=Homo sapiens GN=FTSJ3 PE=1 SV=2
Q96RD7	PANX1	Pannexin-1	-0.233888	-0.281312	-0.257405		42.26	10.843	14	6	4	2	4	2	7865600	7405500	4900600	8219100	15.5	>sp|Q96RD7|PANX1_HUMAN Pannexin-1 OS=Homo sapiens GN=PANX1 PE=1 SV=4
Q8IZX4	TAF1L	Transcription initiation factor TFIID subunit 1-like	-0.0918015	-0.444349	-0.257333		35.788	22.467	3	4	2	3	2	3	1779400	1343000	1477700	1614800	5.6	>sp|Q8IZX4|TAF1L_HUMAN Transcription initiation factor TFIID subunit 1-like OS=Homo sapiens GN=TAF1L PE=1 SV=1;>sp|P21675|TAF1_HUMAN Transcription initiation factor TFIID subunit 1 OS=Homo sapiens GN=TAF1 PE=1 SV=2
Q14684	RRP1B	Ribosomal RNA processing protein 1 homolog B	-0.290896	-0.224287	-0.257207		33.619	31.288	104	107	27	21	27	21	226920000	268590000	401030000	512170000	54.6	>sp|Q14684|RRP1B_HUMAN Ribosomal RNA processing protein 1 homolog B OS=Homo sapiens GN=RRP1B PE=1 SV=3
Q9H7B2	RPF2	Ribosome production factor 2 homolog	-0.379843	-0.144177	-0.257203		35.026	18.122	46	49	12	8	12	8	97459000	107200000	248750000	322900000	43.5	>sp|Q9H7B2|RPF2_HUMAN Ribosome production factor 2 homolog OS=Homo sapiens GN=RPF2 PE=1 SV=2
Q13813	SPTAN1	Spectrin alpha chain, non-erythrocytic 1	-0.255199	-0.257976	-0.256587		19.804	17.052	2405	2383	188	171	188	170	23969000000	24663000000	54418000000	72153000000	77	>sp|Q13813|SPTN1_HUMAN Spectrin alpha chain, non-erythrocytic 1 OS=Homo sapiens GN=SPTAN1 PE=1 SV=3
P28331	NDUFS1	NADH-ubiquinone oxidoreductase 75 kDa subunit, mitochondrial	-0.536252	-0.0220482	-0.256361		33.304	29.946	164	127	29	26	29	26	371200000	458940000	976700000	1048500000	56.3	>sp|P28331|NDUS1_HUMAN NADH-ubiquinone oxidoreductase 75 kDa subunit, mitochondrial OS=Homo sapiens GN=NDUFS1 PE=1 SV=3
Q96DA6	DNAJC19	Mitochondrial import inner membrane translocase subunit TIM14	-0.266757	-0.245739	-0.25621		9.9446	8.3729	16	15	5	5	5	5	19427000	21195000	86451000	110340000	49.1	>sp|Q96DA6|TIM14_HUMAN Mitochondrial import inner membrane translocase subunit TIM14 OS=Homo sapiens GN=DNAJC19 PE=1 SV=3
P98196	ATP11A	Probable phospholipid-transporting ATPase IH	-0.400429	-0.123666	-0.255421		15.733	12.551	14	5	5	4	5	4	22332000	25478000	11266000	15278000	8.6	>sp|P98196|AT11A_HUMAN Probable phospholipid-transporting ATPase IH OS=Homo sapiens GN=ATP11A PE=1 SV=3
Q9ULV0	MYO5B	Unconventional myosin-Vb	-0.465609	-0.0717627	-0.255288		28.888	22.705	7	7	4	4	4	3	4769100	5620500	18364000	20127000	6.1	>sp|Q9ULV0|MYO5B_HUMAN Unconventional myosin-Vb OS=Homo sapiens GN=MYO5B PE=1 SV=3
Q16822	PCK2	Phosphoenolpyruvate carboxykinase [GTP], mitochondrial	-0.422879	-0.104739	-0.255057		30.023	29.684	201	189	27	26	27	26	593960000	708460000	1400100000	1673600000	55.3	>sp|Q16822|PCKGM_HUMAN Phosphoenolpyruvate carboxykinase [GTP], mitochondrial OS=Homo sapiens GN=PCK2 PE=1 SV=3
Q9Y291	MRPS33	28S ribosomal protein S33, mitochondrial	-0.154194	-0.363115	-0.254876		18.773	15.636	8	7	3	2	3	2	23605000	21225000	30160000	39775000	38.7	>sp|Q9Y291|RT33_HUMAN 28S ribosomal protein S33, mitochondrial OS=Homo sapiens GN=MRPS33 PE=1 SV=1
Q9GZS1	POLR1E	DNA-directed RNA polymerase I subunit RPA49	-0.293135	-0.217603	-0.254875		20.588	14.858	19	36	8	12	8	12	35065000	40654000	181980000	223910000	28.7	>sp|Q9GZS1|RPA49_HUMAN DNA-directed RNA polymerase I subunit RPA49 OS=Homo sapiens GN=POLR1E PE=1 SV=2
Q96HY7	DHTKD1	Probable 2-oxoglutarate dehydrogenase E1 component DHKTD1, mitochondrial	-0.437121	-0.0930191	-0.254835		17.386	25.173	24	21	8	10	8	10	25078000	31123000	59205000	117710000	22.9	>sp|Q96HY7|DHTK1_HUMAN Probable 2-oxoglutarate dehydrogenase E1 component DHKTD1, mitochondrial OS=Homo sapiens GN=DHTKD1 PE=1 SV=2
P48066	SLC6A11	Sodium- and chloride-dependent GABA transporter 3	-0.419323	-0.106616	-0.254514		16.756	20.323	20	18	4	6	3	5	38345000	48323000	107300000	135280000	10	>sp|P48066|S6A11_HUMAN Sodium- and chloride-dependent GABA transporter 3 OS=Homo sapiens GN=SLC6A11 PE=2 SV=1
P17844	DDX5	Probable ATP-dependent RNA helicase DDX5	-0.289362	-0.220082	-0.254306		14.542	16.801	251	214	24	22	24	22	1360600000	1519500000	3718500000	4885600000	55	>sp|P17844|DDX5_HUMAN Probable ATP-dependent RNA helicase DDX5 OS=Homo sapiens GN=DDX5 PE=1 SV=1
Q4G0N4	NADK2	NAD kinase 2, mitochondrial	-0.251447	-0.256769	-0.254105		30.296	23.21	74	109	13	16	13	16	335200000	336430000	1194000000	1572200000	45.7	>sp|Q4G0N4|NAKD2_HUMAN NAD kinase 2, mitochondrial OS=Homo sapiens GN=NADK2 PE=1 SV=2
Q9H2W6	MRPL46	39S ribosomal protein L46, mitochondrial	-0.276913	-0.23131	-0.253931		14.751	21.643	68	66	11	10	11	10	123940000	134880000	293070000	372370000	51.3	>sp|Q9H2W6|RM46_HUMAN 39S ribosomal protein L46, mitochondrial OS=Homo sapiens GN=MRPL46 PE=1 SV=1
O75306	NDUFS2	NADH dehydrogenase [ubiquinone] iron-sulfur protein 2, mitochondrial	-0.43957	-0.0882773	-0.253258		13.382	31.153	115	114	18	16	18	16	376980000	422220000	1100800000	1238100000	54.9	>sp|O75306|NDUS2_HUMAN NADH dehydrogenase [ubiquinone] iron-sulfur protein 2, mitochondrial OS=Homo sapiens GN=NDUFS2 PE=1 SV=2
Q5T3I0	GPATCH4	G patch domain-containing protein 4	-0.220949	-0.285225	-0.252729		54.437	17.569	28	27	11	11	11	11	53617000	49946000	74336000	112120000	33.9	>sp|Q5T3I0|GPTC4_HUMAN G patch domain-containing protein 4 OS=Homo sapiens GN=GPATCH4 PE=1 SV=2
Q9H0H0	INTS2	Integrator complex subunit 2	-0.200881	-0.306029	-0.252497		13.365	18.651	9	12	3	8	3	8	7285600	6468700	14409000	40628000	10.9	>sp|Q9H0H0|INT2_HUMAN Integrator complex subunit 2 OS=Homo sapiens GN=INTS2 PE=1 SV=2
O95070	YIF1A	Protein YIF1A	-0.427928	-0.0958569	-0.252359		16.432	2.371	4	3	2	2	2	2	10440000	11461000	30028000	40410000	15.7	>sp|O95070|YIF1A_HUMAN Protein YIF1A OS=Homo sapiens GN=YIF1A PE=1 SV=2
Q14165	MLEC	Malectin	-0.27858	-0.226262	-0.252184		32.275	15.641	82	58	12	12	12	12	180430000	194480000	454620000	601740000	51	>sp|Q14165|MLEC_HUMAN Malectin OS=Homo sapiens GN=MLEC PE=1 SV=1
O94973	AP2A2	AP-2 complex subunit alpha-2	-0.292193	-0.211884	-0.25148		24.715	20.622	78	62	20	15	20	15	76681000	77426000	177800000	218740000	45.8	>sp|O94973|AP2A2_HUMAN AP-2 complex subunit alpha-2 OS=Homo sapiens GN=AP2A2 PE=1 SV=2
Q13488	TCIRG1	V-type proton ATPase 116 kDa subunit a isoform 3	-0.358734	-0.150949	-0.251104		25.246	27.358	13	28	9	10	9	10	7911300	9648300	57176000	58768000	24.9	>sp|Q13488|VPP3_HUMAN V-type proton ATPase 116 kDa subunit a isoform 3 OS=Homo sapiens GN=TCIRG1 PE=1 SV=3
Q96I23	PYURF	Protein preY, mitochondrial	-0.311968	-0.192447	-0.25097		45.545	11.904	12	5	3	3	3	3	3808600	3253100	3267900	3293700	48.2	>sp|Q96I23|PREY_HUMAN Protein preY, mitochondrial OS=Homo sapiens GN=PYURF PE=1 SV=1
P51649	ALDH5A1	Succinate-semialdehyde dehydrogenase, mitochondrial	-0.365916	-0.143785	-0.25058		20.445	14.071	63	54	15	13	15	13	116560000	131680000	274600000	345900000	46.5	>sp|P51649|SSDH_HUMAN Succinate-semialdehyde dehydrogenase, mitochondrial OS=Homo sapiens GN=ALDH5A1 PE=1 SV=2
P61513	RPL37A	60S ribosomal protein L37a	-0.451857	-0.073546	-0.250337		17.695	22.841	30	23	3	4	3	4	93162000	108400000	110860000	142300000	50	>sp|P61513|RL37A_HUMAN 60S ribosomal protein L37a OS=Homo sapiens GN=RPL37A PE=1 SV=2
Q6P4Q7	CNNM4	Metal transporter CNNM4	-0.18954	-0.313014	-0.249956		22.24	20.589	12	16	7	7	5	6	7375700	7175900	21566000	27979000	18.3	>sp|Q6P4Q7|CNNM4_HUMAN Metal transporter CNNM4 OS=Homo sapiens GN=CNNM4 PE=1 SV=3
Q86W92	PPFIBP1	Liprin-beta-1	-0.284159	-0.216113	-0.249735		30.362	18.947	30	36	12	14	11	14	17346000	20880000	53600000	64278000	24.4	>sp|Q86W92|LIPB1_HUMAN Liprin-beta-1 OS=Homo sapiens GN=PPFIBP1 PE=1 SV=2
Q9Y2S7	POLDIP2	Polymerase delta-interacting protein 2	-0.340505	-0.163756	-0.249426		28.043	14.042	44	57	13	12	13	12	93908000	107340000	396160000	500280000	52.7	>sp|Q9Y2S7|PDIP2_HUMAN Polymerase delta-interacting protein 2 OS=Homo sapiens GN=POLDIP2 PE=1 SV=1
P51159	RAB27A	Ras-related protein Rab-27A	-0.216734	-0.282855	-0.249416		13.744	24.268	13	15	6	3	6	3	27566000	25001000	39289000	58481000	38.5	>sp|P51159|RB27A_HUMAN Ras-related protein Rab-27A OS=Homo sapiens GN=RAB27A PE=1 SV=3
Q86UT6	NLRX1	NLR family member X1	-0.676358	0.0797676	-0.249315		25.066	19.058	7	3	2	2	2	2	4933600	4904900	3851900	3935900	6.9	>sp|Q86UT6|NLRX1_HUMAN NLR family member X1 OS=Homo sapiens GN=NLRX1 PE=1 SV=1
Q13112	CHAF1B	Chromatin assembly factor 1 subunit B	-0.174534	-0.328147	-0.249297		15.281	32.69	8	5	3	3	3	3	10100000	9999500	6023700	7586000	11.1	>sp|Q13112|CAF1B_HUMAN Chromatin assembly factor 1 subunit B OS=Homo sapiens GN=CHAF1B PE=1 SV=1
Q53GS7	GLE1	Nucleoporin GLE1	-0.397474	-0.1149	-0.24928		24.987	22.686	16	21	7	10	7	10	9995200	13064000	38717000	51727000	28.9	>sp|Q53GS7|GLE1_HUMAN Nucleoporin GLE1 OS=Homo sapiens GN=GLE1 PE=1 SV=2
Q9BVX2	TMEM106C	Transmembrane protein 106C	-0.416299	-0.0994972	-0.24922		21.771	22.392	8	4	2	2	2	2	3832100	4833600	5788000	6861200	19.6	>sp|Q9BVX2|T106C_HUMAN Transmembrane protein 106C OS=Homo sapiens GN=TMEM106C PE=2 SV=1
Q7L1W4	LRRC8D	Leucine-rich repeat-containing protein 8D	-0.234133	-0.264356	-0.249166		31.503	23.225	12	13	5	8	5	8	3983000	4061900	17809000	21445000	12.8	>sp|Q7L1W4|LRC8D_HUMAN Leucine-rich repeat-containing protein 8D OS=Homo sapiens GN=LRRC8D PE=1 SV=1
O75964	ATP5L	ATP synthase subunit g, mitochondrial	-0.301822	-0.198243	-0.249103		22.587	14.11	31	46	5	3	5	3	194360000	230970000	1113300000	1421000000	45.6	>sp|O75964|ATP5L_HUMAN ATP synthase subunit g, mitochondrial OS=Homo sapiens GN=ATP5L PE=1 SV=3
Q1KMD3	HNRNPUL2	Heterogeneous nuclear ribonucleoprotein U-like protein 2	-0.202386	-0.29725	-0.249039		30.483	19.329	223	220	32	27	32	27	970600000	1000500000	2077900000	2795300000	46.7	>sp|Q1KMD3|HNRL2_HUMAN Heterogeneous nuclear ribonucleoprotein U-like protein 2 OS=Homo sapiens GN=HNRNPUL2 PE=1 SV=1
Q9NVU7	SDAD1	Protein SDA1 homolog	-0.29901	-0.200379	-0.248852		19.685	16.431	13	14	4	5	4	5	13076000	9851800	30304000	33920000	13	>sp|Q9NVU7|SDA1_HUMAN Protein SDA1 homolog OS=Homo sapiens GN=SDAD1 PE=1 SV=3
Q9ULH0	KIDINS220	Kinase D-interacting substrate of 220 kDa	-0.297368	-0.201508	-0.248642		10.724	21.498	7	4	5	4	5	4	1261500	1487700	61896000	3136000	6.8	>sp|Q9ULH0|KDIS_HUMAN Kinase D-interacting substrate of 220 kDa OS=Homo sapiens GN=KIDINS220 PE=1 SV=3
Q96C36	PYCR2	Pyrroline-5-carboxylate reductase 2	-0.437547	-0.0812032	-0.248401		22.315	16.109	58	49	9	7	9	7	166390000	199730000	429250000	536800000	46.2	>sp|Q96C36|P5CR2_HUMAN Pyrroline-5-carboxylate reductase 2 OS=Homo sapiens GN=PYCR2 PE=1 SV=1
Q9NPF0	CD320	CD320 antigen	-0.250113	-0.246104	-0.248107		23.916	23.559	17	13	5	3	5	3	20184000	23049000	39874000	57206000	23.4	>sp|Q9NPF0|CD320_HUMAN CD320 antigen OS=Homo sapiens GN=CD320 PE=1 SV=1
Q14554	PDIA5	Protein disulfide-isomerase A5	-0.284396	-0.212507	-0.248004		19.469	19.769	117	126	23	18	23	18	312170000	338940000	1035400000	1361700000	64.4	>sp|Q14554|PDIA5_HUMAN Protein disulfide-isomerase A5 OS=Homo sapiens GN=PDIA5 PE=1 SV=1
Q5BJF2	TMEM97	Transmembrane protein 97	-0.403159	-0.107688	-0.247872		12.187	19.309	37	34	3	3	3	3	297510000	345750000	887980000	1161000000	13.1	>sp|Q5BJF2|TMM97_HUMAN Transmembrane protein 97 OS=Homo sapiens GN=TMEM97 PE=1 SV=1
Q8WWB7	C1orf85	Lysosomal protein NCU-G1	-0.260748	-0.234747	-0.247689		33.691	17.602	14	8	3	2	3	2	42688000	45780000	35910000	45280000	14.5	>sp|Q8WWB7|NCUG1_HUMAN Lysosomal protein NCU-G1 OS=Homo sapiens GN=C1orf85 PE=1 SV=1
P11177	PDHB	Pyruvate dehydrogenase E1 component subunit beta, mitochondrial	-0.276675	-0.218719	-0.247406		24.415	30.339	140	106	15	14	15	14	453320000	480800000	1055000000	1350300000	64.6	>sp|P11177|ODPB_HUMAN Pyruvate dehydrogenase E1 component subunit beta, mitochondrial OS=Homo sapiens GN=PDHB PE=1 SV=3
Q99720	SIGMAR1	Sigma non-opioid intracellular receptor 1	-0.383607	-0.121811	-0.246779		17.099	12.097	22	14	5	5	5	5	51023000	63693000	137580000	148790000	32.7	>sp|Q99720|SGMR1_HUMAN Sigma non-opioid intracellular receptor 1 OS=Homo sapiens GN=SIGMAR1 PE=1 SV=1
Q9NZD8	SPG21	Maspardin	-0.333653	-0.164143	-0.24641		15.409	29.007	7	9	2	2	2	2	2289300	2417700	6261500	6884600	11	>sp|Q9NZD8|SPG21_HUMAN Maspardin OS=Homo sapiens GN=SPG21 PE=1 SV=1
Q8IZ81	ELMOD2	ELMO domain-containing protein 2	-0.454702	-0.0641931	-0.246275		25.732	20.225	33	28	8	5	8	5	49244000	61081000	152080000	170730000	28.3	>sp|Q8IZ81|ELMD2_HUMAN ELMO domain-containing protein 2 OS=Homo sapiens GN=ELMOD2 PE=1 SV=1
Q7Z2W4	ZC3HAV1	Zinc finger CCCH-type antiviral protein 1	-0.414027	-0.0958569	-0.246189		27.359	21.915	71	82	20	20	20	20	118800000	170560000	325720000	411300000	40.8	>sp|Q7Z2W4|ZCCHV_HUMAN Zinc finger CCCH-type antiviral protein 1 OS=Homo sapiens GN=ZC3HAV1 PE=1 SV=3
Q9NY35	CLDND1	Claudin domain-containing protein 1	-0.400101	-0.10608	-0.245613		20.825	14.178	8	11	3	2	3	2	11290000	13737000	36219000	39834000	14.6	>sp|Q9NY35|CLDN1_HUMAN Claudin domain-containing protein 1 OS=Homo sapiens GN=CLDND1 PE=1 SV=1
Q8WTV0	SCARB1	Scavenger receptor class B member 1	-0.294194	-0.198117	-0.245356		19.12	43.286	40	26	9	6	9	6	138200000	166890000	295620000	353850000	16.5	>sp|Q8WTV0|SCRB1_HUMAN Scavenger receptor class B member 1 OS=Homo sapiens GN=SCARB1 PE=1 SV=1
Q8N335	GPD1L	Glycerol-3-phosphate dehydrogenase 1-like protein	-0.467801	-0.052555	-0.245289		25.457	16.395	10	17	7	9	7	9	16037000	12661000	66556000	75853000	32.5	>sp|Q8N335|GPD1L_HUMAN Glycerol-3-phosphate dehydrogenase 1-like protein OS=Homo sapiens GN=GPD1L PE=1 SV=1
P21796	VDAC1	Voltage-dependent anion-selective channel protein 1	-0.177727	-0.316146	-0.245277		30.637	16.197	290	221	18	17	18	17	3418800000	3302100000	7102600000	9875500000	74.6	>sp|P21796|VDAC1_HUMAN Voltage-dependent anion-selective channel protein 1 OS=Homo sapiens GN=VDAC1 PE=1 SV=2
P61026	RAB10	Ras-related protein Rab-10	-0.337083	-0.158854	-0.245218		15.922	11.404	64	57	9	11	9	10	230350000	257040000	797200000	985810000	56	>sp|P61026|RAB10_HUMAN Ras-related protein Rab-10 OS=Homo sapiens GN=RAB10 PE=1 SV=1
A1L390	PLEKHG3	Pleckstrin homology domain-containing family G member 3	0.101737	-0.702392	-0.245012		9.8615	25.805	5	6	2	3	2	3	11969000	11477000	10617000	14696000	4.8	>sp|A1L390|PKHG3_HUMAN Pleckstrin homology domain-containing family G member 3 OS=Homo sapiens GN=PLEKHG3 PE=1 SV=1
P61019	RAB2A	Ras-related protein Rab-2A	-0.280244	-0.210015	-0.244702		22.056	20.387	114	119	14	12	7	7	532490000	563530000	1725100000	2295800000	75	>sp|P61019|RAB2A_HUMAN Ras-related protein Rab-2A OS=Homo sapiens GN=RAB2A PE=1 SV=1
P11388	TOP2A	DNA topoisomerase 2-alpha	-0.412402	-0.0936954	-0.244266		33.007	16.461	156	126	38	38	38	38	162450000	193090000	468510000	548960000	45.7	>sp|P11388|TOP2A_HUMAN DNA topoisomerase 2-alpha OS=Homo sapiens GN=TOP2A PE=1 SV=3
Q8WZ42	TTN	Titin	-0.298189	-0.191815	-0.244022		42.521	71.009	14	28	9	14	9	14	358480000	197520000	1942200000	1357200000	0.7	>sp|Q8WZ42|TITIN_HUMAN Titin OS=Homo sapiens GN=TTN PE=1 SV=4
Q13425	SNTB2	Beta-2-syntrophin	-0.233152	-0.254957	-0.244013		24.049	33.02	23	31	10	11	10	11	30101000	34876000	96746000	123400000	34.1	>sp|Q13425|SNTB2_HUMAN Beta-2-syntrophin OS=Homo sapiens GN=SNTB2 PE=1 SV=1
P41440	SLC19A1	Folate transporter 1	-0.471135	-0.0451634	-0.242485		12.806	37.649	4	3	2	2	2	2	6600500	3971700	9829900	14525000	6.8	>sp|P41440|S19A1_HUMAN Folate transporter 1 OS=Homo sapiens GN=SLC19A1 PE=1 SV=3
Q9H4L4	SENP3	Sentrin-specific protease 3	-0.289244	-0.196985	-0.242377		20.326	3.3879	7	3	3	2	3	2	5666600	6442900	9895300	11511000	15	>sp|Q9H4L4|SENP3_HUMAN Sentrin-specific protease 3 OS=Homo sapiens GN=SENP3 PE=1 SV=2
O95714	HERC2	E3 ubiquitin-protein ligase HERC2	-0.501719	-0.0221902	-0.242122		18.258	18.277	7	11	4	6	4	6	2989500	4471500	13256000	11493000	3.3	>sp|O95714|HERC2_HUMAN E3 ubiquitin-protein ligase HERC2 OS=Homo sapiens GN=HERC2 PE=1 SV=2
O14828	SCAMP3	Secretory carrier-associated membrane protein 3	-0.407407	-0.0931544	-0.241741		25.416	22.781	56	62	7	8	7	8	165370000	191870000	328870000	413970000	38.3	>sp|O14828|SCAM3_HUMAN Secretory carrier-associated membrane protein 3 OS=Homo sapiens GN=SCAMP3 PE=1 SV=3
Q8IZA0	KIAA0319L	Dyslexia-associated protein KIAA0319-like protein	-0.153805	-0.335369	-0.241733		21.102	20.78	26	21	9	8	9	8	20521000	22342000	51557000	66977000	13.8	>sp|Q8IZA0|K319L_HUMAN Dyslexia-associated protein KIAA0319-like protein OS=Homo sapiens GN=KIAA0319L PE=1 SV=2
Q92930	RAB8B	Ras-related protein Rab-8B	-0.494262	-0.0257375	-0.241063		44.096	12.462	5	25	3	3	3	3	36389000	44045000	281150000	330340000	45.9	>sp|Q92930|RAB8B_HUMAN Ras-related protein Rab-8B OS=Homo sapiens GN=RAB8B PE=1 SV=2
Q9Y2E5	MAN2B2	Epididymis-specific alpha-mannosidase	-0.223793	-0.258459	-0.241022		45.571	19.699	3	7	2	4	2	4	2814600	2559200	28090000	54874000	6.1	>sp|Q9Y2E5|MA2B2_HUMAN Epididymis-specific alpha-mannosidase OS=Homo sapiens GN=MAN2B2 PE=1 SV=4
Q9Y6I9	TEX264	Testis-expressed sequence 264 protein	-0.281669	-0.200379	-0.240451		14.989	19.68	51	32	10	10	10	10	67452000	75802000	137480000	171930000	43.1	>sp|Q9Y6I9|TX264_HUMAN Testis-expressed sequence 264 protein OS=Homo sapiens GN=TEX264 PE=1 SV=1
Q9BV40	VAMP8	Vesicle-associated membrane protein 8	-0.0757379	-0.426318	-0.240405		9.9467	77.528	19	14	4	5	4	5	117500000	109020000	264860000	212100000	41	>sp|Q9BV40|VAMP8_HUMAN Vesicle-associated membrane protein 8 OS=Homo sapiens GN=VAMP8 PE=1 SV=1
Q16799	RTN1	Reticulon-1	-0.257735	-0.223052	-0.240289		65.647	14.52	14	12	5	4	5	4	39369000	39330000	152190000	189560000	16.5	>sp|Q16799|RTN1_HUMAN Reticulon-1 OS=Homo sapiens GN=RTN1 PE=1 SV=1
Q99624	SLC38A3	Sodium-coupled neutral amino acid transporter 3	-0.336855	-0.149129	-0.239941		14.652	15.87	16	13	3	4	3	4	4700700	4516400	13070000	13723000	11.5	>sp|Q99624|S38A3_HUMAN Sodium-coupled neutral amino acid transporter 3 OS=Homo sapiens GN=SLC38A3 PE=2 SV=1
Q9Y5U9	IER3IP1	Immediate early response 3-interacting protein 1	-0.422125	-0.077243	-0.239403		20.11	7.7362	14	13	2	2	2	2	58550000	63749000	196390000	228380000	34.1	>sp|Q9Y5U9|IR3IP_HUMAN Immediate early response 3-interacting protein 1 OS=Homo sapiens GN=IER3IP1 PE=1 SV=1
Q02127	DHODH	Dihydroorotate dehydrogenase (quinone), mitochondrial	-0.212134	-0.266636	-0.239128		22.81	14.172	38	21	14	8	14	8	59784000	51957000	103380000	153140000	45.3	>sp|Q02127|PYRD_HUMAN Dihydroorotate dehydrogenase (quinone), mitochondrial OS=Homo sapiens GN=DHODH PE=1 SV=3
P08559	PDHA1	Pyruvate dehydrogenase E1 component subunit alpha, somatic form, mitochondrial	-0.239031	-0.238909	-0.23897		25.848	19.587	152	112	19	18	17	15	498910000	534520000	1021900000	1483400000	60.8	>sp|P08559|ODPA_HUMAN Pyruvate dehydrogenase E1 component subunit alpha, somatic form, mitochondrial OS=Homo sapiens GN=PDHA1 PE=1 SV=3
P32780	GTF2H1	General transcription factor IIH subunit 1	-0.203765	-0.275007	-0.238946		15.092	32.905	16	15	4	6	4	6	8111400	9320700	35488000	60173000	25.4	>sp|P32780|TF2H1_HUMAN General transcription factor IIH subunit 1 OS=Homo sapiens GN=GTF2H1 PE=1 SV=1
O95210	STBD1	Starch-binding domain-containing protein 1	-0.24732	-0.230572	-0.238922		22.116	17.467	73	85	15	17	15	17	217360000	203290000	608830000	799160000	58.4	>sp|O95210|STBD1_HUMAN Starch-binding domain-containing protein 1 OS=Homo sapiens GN=STBD1 PE=1 SV=1
Q9NUI1	DECR2	Peroxisomal 2,4-dienoyl-CoA reductase	-0.326883	-0.154713	-0.238231		14.976	16.89	43	51	11	9	11	9	112850000	125920000	324740000	399770000	41.4	>sp|Q9NUI1|DECR2_HUMAN Peroxisomal 2,4-dienoyl-CoA reductase OS=Homo sapiens GN=DECR2 PE=1 SV=1
P04179	SOD2	Superoxide dismutase [Mn], mitochondrial	-0.282262	-0.194465	-0.237696		12.558	13.452	118	120	13	10	13	10	1557800000	1654200000	3996700000	5058200000	67.1	>sp|P04179|SODM_HUMAN Superoxide dismutase [Mn], mitochondrial OS=Homo sapiens GN=SOD2 PE=1 SV=2
O75127	PTCD1	Pentatricopeptide repeat-containing protein 1, mitochondrial	-0.487589	-0.0246034	-0.237603		18.334	17.337	12	22	6	8	6	8	8443700	11039000	88156000	111120000	13.9	>sp|O75127|PTCD1_HUMAN Pentatricopeptide repeat-containing protein 1, mitochondrial OS=Homo sapiens GN=PTCD1 PE=1 SV=2
Q9UNK0	STX8	Syntaxin-8	-0.228603	-0.246104	-0.237327		14.141	47.753	9	13	4	3	4	3	5356600	6381800	30575000	38139000	24.2	>sp|Q9UNK0|STX8_HUMAN Syntaxin-8 OS=Homo sapiens GN=STX8 PE=1 SV=2
P22695	UQCRC2	Cytochrome b-c1 complex subunit 2, mitochondrial	-0.247077	-0.227248	-0.237128		18.525	24.824	139	123	19	19	19	19	1042800000	1092100000	2777300000	3793300000	61.1	>sp|P22695|QCR2_HUMAN Cytochrome b-c1 complex subunit 2, mitochondrial OS=Homo sapiens GN=UQCRC2 PE=1 SV=3
Q9Y2C4	EXOG	Nuclease EXOG, mitochondrial	-0.127897	-0.355242	-0.237096		57.267	12.824	8	12	4	5	4	5	7645900	7059100	21801000	32373000	24.7	>sp|Q9Y2C4|EXOG_HUMAN Nuclease EXOG, mitochondrial OS=Homo sapiens GN=EXOG PE=1 SV=2
Q7Z7K0	CMC1	COX assembly mitochondrial protein homolog	-0.16633	-0.311503	-0.237091		13.147	8.4528	25	19	6	6	6	6	64206000	61904000	126280000	168130000	64.2	>sp|Q7Z7K0|COXM1_HUMAN COX assembly mitochondrial protein homolog OS=Homo sapiens GN=CMC1 PE=1 SV=1
P36957	DLST	Dihydrolipoyllysine-residue succinyltransferase component of 2-oxoglutarate dehydrogenase complex, mitochondrial	-0.235114	-0.238787	-0.236949		14.909	18.753	85	107	14	11	14	11	366270000	324950000	1003500000	1304500000	38.2	>sp|P36957|ODO2_HUMAN Dihydrolipoyllysine-residue succinyltransferase component of 2-oxoglutarate dehydrogenase complex, mitochondrial OS=Homo sapiens GN=DLST PE=1 SV=4
Q6EMK4	VASN	Vasorin	-0.386149	-0.101516	-0.236824		25.527	10.841	10	11	4	3	4	3	14034000	16393000	10507000	11909000	8.2	>sp|Q6EMK4|VASN_HUMAN Vasorin OS=Homo sapiens GN=VASN PE=1 SV=1
P78316	NOP14	Nucleolar protein 14	-0.173511	-0.302641	-0.236632		69.189	33.802	30	25	13	12	13	12	29953000	60518000	44120000	59484000	26.1	>sp|P78316|NOP14_HUMAN Nucleolar protein 14 OS=Homo sapiens GN=NOP14 PE=1 SV=3
Q969X5	ERGIC1	Endoplasmic reticulum-Golgi intermediate compartment protein 1	-0.357383	-0.125122	-0.236584		16.369	11.668	49	52	9	9	9	9	232400000	264280000	568900000	749390000	45.9	>sp|Q969X5|ERGI1_HUMAN Endoplasmic reticulum-Golgi intermediate compartment protein 1 OS=Homo sapiens GN=ERGIC1 PE=1 SV=1
Q9Y5J7	TIMM9	Mitochondrial import inner membrane translocase subunit Tim9	-0.246226	-0.227002	-0.236582		15.194	17.298	45	49	6	5	6	5	216880000	226930000	817340000	1015100000	80.9	>sp|Q9Y5J7|TIM9_HUMAN Mitochondrial import inner membrane translocase subunit Tim9 OS=Homo sapiens GN=TIMM9 PE=1 SV=1
Q96LJ7	DHRS1	Dehydrogenase/reductase SDR family member 1	-0.24184	-0.23131	-0.236565		39.819	14.961	41	34	11	8	11	8	62482000	69577000	124480000	95993000	54.3	>sp|Q96LJ7|DHRS1_HUMAN Dehydrogenase/reductase SDR family member 1 OS=Homo sapiens GN=DHRS1 PE=1 SV=1
P37268	FDFT1	Squalene synthase	-0.516923	-0.00144202	-0.236281		16.42	22.428	93	106	18	16	18	16	330670000	404280000	1171000000	1329800000	52.8	>sp|P37268|FDFT_HUMAN Squalene synthase OS=Homo sapiens GN=FDFT1 PE=1 SV=1
Q9BRQ6	CHCHD6	Coiled-coil-helix-coiled-coil-helix domain-containing protein 6, mitochondrial	-0.167872	-0.305912	-0.235242		16.219	25.468	20	16	4	6	4	6	50699000	47863000	61643000	87153000	37.9	>sp|Q9BRQ6|CHCH6_HUMAN Coiled-coil-helix-coiled-coil-helix domain-containing protein 6, mitochondrial OS=Homo sapiens GN=CHCHD6 PE=1 SV=1
O14521	SDHD	Succinate dehydrogenase [ubiquinone] cytochrome b small subunit, mitochondrial	-0.0935602	-0.391768	-0.234973		44.166	8.369	8	12	2	2	2	2	8077500	9080800	58415000	87007000	10.7	>sp|O14521|DHSD_HUMAN Succinate dehydrogenase [ubiquinone] cytochrome b small subunit, mitochondrial OS=Homo sapiens GN=SDHD PE=1 SV=1
P39023	RPL3	60S ribosomal protein L3	-0.484086	-0.0224744	-0.234896		29.685	18.804	187	217	20	16	20	16	1134600000	1334300000	4501900000	5130100000	49.1	>sp|P39023|RL3_HUMAN 60S ribosomal protein L3 OS=Homo sapiens GN=RPL3 PE=1 SV=2
Q96HS1	PGAM5	Serine/threonine-protein phosphatase PGAM5, mitochondrial	-0.264236	-0.205393	-0.234514		22.009	22.817	73	72	14	15	14	15	240890000	244740000	930990000	1219300000	58.1	>sp|Q96HS1|PGAM5_HUMAN Serine/threonine-protein phosphatase PGAM5, mitochondrial OS=Homo sapiens GN=PGAM5 PE=1 SV=2
P05166	PCCB	Propionyl-CoA carboxylase beta chain, mitochondrial	-0.390338	-0.0936954	-0.234405		16.303	21.5	32	38	9	13	9	13	24992000	28001000	98041000	107240000	36.4	>sp|P05166|PCCB_HUMAN Propionyl-CoA carboxylase beta chain, mitochondrial OS=Homo sapiens GN=PCCB PE=1 SV=3
P22033	MUT	Methylmalonyl-CoA mutase, mitochondrial	-0.370388	-0.109829	-0.234234		17.073	18.271	49	61	18	17	18	17	83822000	92715000	203240000	228850000	42.5	>sp|P22033|MUTA_HUMAN Methylmalonyl-CoA mutase, mitochondrial OS=Homo sapiens GN=MUT PE=1 SV=4
P02545	LMNA	Prelamin-A/C	-0.286526	-0.182692	-0.233675		25.385	19.376	485	494	48	47	46	45	4616700000	4898800000	12144000000	15520000000	72.7	>sp|P02545|LMNA_HUMAN Prelamin-A/C OS=Homo sapiens GN=LMNA PE=1 SV=1
Q14344	GNA13	Guanine nucleotide-binding protein subunit alpha-13	-0.231678	-0.235237	-0.233456		42.404	17.409	67	69	19	14	18	13	88323000	93611000	318540000	412440000	53.8	>sp|Q14344|GNA13_HUMAN Guanine nucleotide-binding protein subunit alpha-13 OS=Homo sapiens GN=GNA13 PE=1 SV=2
P04899	GNAI2	Guanine nucleotide-binding protein G(i) subunit alpha-2	-0.145482	-0.326652	-0.233225		16.834	22.485	72	71	15	12	11	8	166130000	151020000	370280000	511830000	57.5	>sp|P04899|GNAI2_HUMAN Guanine nucleotide-binding protein G(i) subunit alpha-2 OS=Homo sapiens GN=GNAI2 PE=1 SV=3
Q9NUJ1	ABHD10	Mycophenolic acid acyl-glucuronide esterase, mitochondrial	-0.207643	-0.259182	-0.233182		22.782	16.491	102	87	16	12	16	12	242720000	332090000	518650000	663600000	60.1	>sp|Q9NUJ1|ABHDA_HUMAN Mycophenolic acid acyl-glucuronide esterase, mitochondrial OS=Homo sapiens GN=ABHD10 PE=1 SV=1
Q05707	COL14A1	Collagen alpha-1(XIV) chain	-0.278936	-0.188781	-0.233154		23.904	20.239	93	134	37	39	37	39	113810000	106720000	383440000	505060000	39.2	>sp|Q05707|COEA1_HUMAN Collagen alpha-1(XIV) chain OS=Homo sapiens GN=COL14A1 PE=1 SV=3
Q15149	PLEC	Plectin	-0.354903	-0.120883	-0.233153		24.515	23.015	736	888	175	192	169	186	1735500000	2075300000	5941900000	7433800000	52.2	>sp|Q15149|PLEC_HUMAN Plectin OS=Homo sapiens GN=PLEC PE=1 SV=3
Q5JPH6	EARS2	Probable glutamate--tRNA ligase, mitochondrial	-0.491699	-0.0139267	-0.233125		19.116	17.098	31	31	13	10	13	10	27428000	33613000	90569000	66452000	40.2	>sp|Q5JPH6|SYEM_HUMAN Probable glutamate--tRNA ligase, mitochondrial OS=Homo sapiens GN=EARS2 PE=1 SV=2
Q5VT66	MAR1	MOSC domain-containing protein 1, mitochondrial	-0.362217	-0.114633	-0.233121		17.625	13.618	56	60	6	6	5	5	76510000	80894000	250210000	302820000	28.8	>sp|Q5VT66|MOSC1_HUMAN MOSC domain-containing protein 1, mitochondrial OS=Homo sapiens GN=MARC1 PE=1 SV=1
Q9BYN8	MRPS26	28S ribosomal protein S26, mitochondrial	-0.239154	-0.227002	-0.233065		30.647	25.439	46	43	7	8	7	8	57488000	61735000	229020000	268330000	37.1	>sp|Q9BYN8|RT26_HUMAN 28S ribosomal protein S26, mitochondrial OS=Homo sapiens GN=MRPS26 PE=1 SV=1
P50440	GATM	Glycine amidinotransferase, mitochondrial	-0.326537	-0.144829	-0.232824		26.352	22.33	155	201	22	21	22	21	727280000	781370000	2026700000	2489000000	66.9	>sp|P50440|GATM_HUMAN Glycine amidinotransferase, mitochondrial OS=Homo sapiens GN=GATM PE=1 SV=1
Q9GZT3	SLIRP	SRA stem-loop-interacting RNA-binding protein, mitochondrial	-0.282618	-0.184344	-0.232644		15.452	19.29	89	74	8	8	8	8	681740000	696700000	1729400000	2174500000	77.1	>sp|Q9GZT3|SLIRP_HUMAN SRA stem-loop-interacting RNA-binding protein, mitochondrial OS=Homo sapiens GN=SLIRP PE=1 SV=1
P35658	NUP214	Nuclear pore complex protein Nup214	-0.288654	-0.178109	-0.232323		37.885	26.648	133	129	33	31	33	31	169530000	183910000	660730000	772580000	29.2	>sp|P35658|NU214_HUMAN Nuclear pore complex protein Nup214 OS=Homo sapiens GN=NUP214 PE=1 SV=2
Q5UCC4	EMC10	ER membrane protein complex subunit 10	-0.232415	-0.231924	-0.23217		25.968	23.895	21	12	2	4	2	4	45053000	50708000	55793000	74777000	16.4	>sp|Q5UCC4|EMC10_HUMAN ER membrane protein complex subunit 10 OS=Homo sapiens GN=EMC10 PE=1 SV=1
Q9BYG3	MKI67IP	MKI67 FHA domain-interacting nucleolar phosphoprotein	-0.361656	-0.1121	-0.231489		22.534	17.62	51	63	12	14	12	14	78844000	77954000	286470000	325680000	56	>sp|Q9BYG3|MK67I_HUMAN MKI67 FHA domain-interacting nucleolar phosphoprotein OS=Homo sapiens GN=MKI67IP PE=1 SV=1
Q9NX62	IMPAD1	Inositol monophosphatase 3	-0.301588	-0.163885	-0.231094		38.241	16.615	59	36	9	8	9	8	74496000	80829000	177240000	222310000	30.6	>sp|Q9NX62|IMPA3_HUMAN Inositol monophosphatase 3 OS=Homo sapiens GN=IMPAD1 PE=1 SV=1
P63010	AP2B1	AP-2 complex subunit beta	-0.385818	-0.0911243	-0.23096		29.485	42.377	252	267	42	38	25	23	541990000	618350000	2517600000	3939600000	54	>sp|P63010|AP2B1_HUMAN AP-2 complex subunit beta OS=Homo sapiens GN=AP2B1 PE=1 SV=1
Q9Y4C8	RBM19	Probable RNA-binding protein 19	-0.431569	-0.0543624	-0.230673		43.795	59.36	32	26	9	12	9	12	36720000	38586000	95809000	110780000	20.7	>sp|Q9Y4C8|RBM19_HUMAN Probable RNA-binding protein 19 OS=Homo sapiens GN=RBM19 PE=1 SV=3
P02763	ORM1	Alpha-1-acid glycoprotein 1	-0.204391	-0.257011	-0.230461		10.21	12.387	15	23	4	4	3	3	35133000	36639000	140610000	184940000	22.9	>sp|P02763|A1AG1_HUMAN Alpha-1-acid glycoprotein 1 OS=Homo sapiens GN=ORM1 PE=1 SV=1
Q9H4I3	TRABD	TraB domain-containing protein	-0.444879	-0.0436245	-0.230346		15.406	29.33	7	17	3	5	3	5	7806000	8961000	28745000	33908000	23.4	>sp|Q9H4I3|TRABD_HUMAN TraB domain-containing protein OS=Homo sapiens GN=TRABD PE=1 SV=1
Q8NCG7	DAGLB	Sn1-specific diacylglycerol lipase beta	-0.343351	-0.125519	-0.230327		16.827	30.396	7	12	3	5	3	5	2626500	3168000	29205000	36632000	9.7	>sp|Q8NCG7|DGLB_HUMAN Sn1-specific diacylglycerol lipase beta OS=Homo sapiens GN=DAGLB PE=1 SV=2
P56747	CLDN6	Claudin-6	-0.426748	-0.057277	-0.230217		30.233	22.993	16	22	4	4	4	4	81916000	87410000	222550000	267840000	20.9	>sp|P56747|CLD6_HUMAN Claudin-6 OS=Homo sapiens GN=CLDN6 PE=1 SV=2
Q13393	PLD1	Phospholipase D1	-0.211261	-0.249021	-0.230017		33.262	25.169	13	7	6	5	6	5	7866300	6611200	5901100	7193900	9.7	>sp|Q13393|PLD1_HUMAN Phospholipase D1 OS=Homo sapiens GN=PLD1 PE=1 SV=1
Q13505	MTX1	Metaxin-1	-0.411752	-0.0686019	-0.229998		19.604	14.002	51	38	8	10	8	10	249000000	256880000	216800000	259710000	26	>sp|Q13505|MTX1_HUMAN Metaxin-1 OS=Homo sapiens GN=MTX1 PE=1 SV=2
P10301	RRAS	Ras-related protein R-Ras	-0.144568	-0.319271	-0.229277		23.128	16.369	7	4	3	2	3	2	14133000	13752000	17038000	20077000	33.9	>sp|P10301|RRAS_HUMAN Ras-related protein R-Ras OS=Homo sapiens GN=RRAS PE=1 SV=1
Q96EX1	SMIM12	Small integral membrane protein 12	-0.219834	-0.238542	-0.229158		26.368	43.938	13	7	4	3	4	3	21081000	20018000	66771000	91190000	27.2	>sp|Q96EX1|SIM12_HUMAN Small integral membrane protein 12 OS=Homo sapiens GN=SMIM12 PE=2 SV=3
Q86TS9	MRPL52	39S ribosomal protein L52, mitochondrial	-0.0581087	-0.422986	-0.229043		25.736	27.272	14	10	2	2	2	2	19657000	19342000	16100000	25566000	41.5	>sp|Q86TS9|RM52_HUMAN 39S ribosomal protein L52, mitochondrial OS=Homo sapiens GN=MRPL52 PE=2 SV=2
P11117	ACP2	Lysosomal acid phosphatase	-0.132511	-0.332278	-0.22894		2.0844	12.205	5	6	5	3	5	3	9429000	10586000	11279000	15299000	19.4	>sp|P11117|PPAL_HUMAN Lysosomal acid phosphatase OS=Homo sapiens GN=ACP2 PE=1 SV=3
Q9H1K0	ZFYVE20	Rabenosyn-5	-0.164529	-0.295253	-0.228411		16.373	35.972	9	10	5	6	5	6	5259200	4914600	15314000	21066000	12.9	>sp|Q9H1K0|RBNS5_HUMAN Rabenosyn-5 OS=Homo sapiens GN=ZFYVE20 PE=1 SV=2
P61421	ATP6V0D1	V-type proton ATPase subunit d 1	-0.373063	-0.0965318	-0.228182		25.896	65.054	74	51	9	12	9	12	184300000	205900000	520040000	562380000	45	>sp|P61421|VA0D1_HUMAN V-type proton ATPase subunit d 1 OS=Homo sapiens GN=ATP6V0D1 PE=1 SV=1
Q9UPN4	AZI1	5-azacytidine-induced protein 1	-0.309758	-0.15056	-0.227964		24.083	23.219	6	8	4	7	4	7	7996200	8857400	10240000	12503000	11.9	>sp|Q9UPN4|AZI1_HUMAN 5-azacytidine-induced protein 1 OS=Homo sapiens GN=AZI1 PE=1 SV=3
Q03001	DST	Dystonin	-0.275722	-0.181675	-0.227932		36.116	26.661	37	53	21	32	21	32	32892000	33698000	141330000	152310000	8.6	>sp|Q03001|DYST_HUMAN Dystonin OS=Homo sapiens GN=DST PE=1 SV=4
Q9GZR2	REXO4	RNA exonuclease 4	-0.244887	-0.211137	-0.227913		14.526	16.28	16	22	7	7	7	7	39206000	42245000	63429000	78624000	35.5	>sp|Q9GZR2|REXO4_HUMAN RNA exonuclease 4 OS=Homo sapiens GN=REXO4 PE=1 SV=2
Q9UGT4	SUSD2	Sushi domain-containing protein 2	-0.281312	-0.176195	-0.227797		18.125	19.427	32	13	11	5	11	5	31818000	33058000	29797000	37606000	29.8	>sp|Q9UGT4|SUSD2_HUMAN Sushi domain-containing protein 2 OS=Homo sapiens GN=SUSD2 PE=1 SV=1
Q96NT5	SLC46A1	Proton-coupled folate transporter	-0.0768328	-0.395721	-0.227484		8.0745	21.754	5	6	3	4	3	4	3005800	2665400	13839000	20618000	14.4	>sp|Q96NT5|PCFT_HUMAN Proton-coupled folate transporter OS=Homo sapiens GN=SLC46A1 PE=1 SV=1
O75165	DNAJC13	DnaJ homolog subfamily C member 13	-0.422018	-0.0554733	-0.227136		24.284	25.049	81	99	32	32	32	32	61412000	81353000	240030000	261720000	28.2	>sp|O75165|DJC13_HUMAN DnaJ homolog subfamily C member 13 OS=Homo sapiens GN=DNAJC13 PE=1 SV=5
Q9Y6X9	MORC2	MORC family CW-type zinc finger protein 2	-0.254715	-0.200002	-0.227099		20.36	19.087	36	39	14	18	14	17	30114000	28647000	87564000	116850000	32.8	>sp|Q9Y6X9|MORC2_HUMAN MORC family CW-type zinc finger protein 2 OS=Homo sapiens GN=MORC2 PE=1 SV=2
O96008	TOMM40	Mitochondrial import receptor subunit TOM40 homolog	-0.184217	-0.271067	-0.226988		27.832	13.518	168	145	12	11	12	11	1102800000	1115300000	1933800000	2709300000	47.4	>sp|O96008|TOM40_HUMAN Mitochondrial import receptor subunit TOM40 homolog OS=Homo sapiens GN=TOMM40 PE=1 SV=1
Q9NPI1	BRD7	Bromodomain-containing protein 7	-0.110363	-0.353549	-0.226838		23.24	22.481	11	10	5	6	5	6	4751100	4508000	12916000	16914000	24	>sp|Q9NPI1|BRD7_HUMAN Bromodomain-containing protein 7 OS=Homo sapiens GN=BRD7 PE=1 SV=1
Q14789	GOLGB1	Golgin subfamily B member 1	-0.362217	-0.101919	-0.226206		26.122	17.882	355	287	99	99	98	98	648380000	721320000	1126100000	1260100000	50.5	>sp|Q14789|GOGB1_HUMAN Golgin subfamily B member 1 OS=Homo sapiens GN=GOLGB1 PE=1 SV=2
Q9NTI5	PDS5B	Sister chromatid cohesion protein PDS5 homolog B	-0.207768	-0.244522	-0.226028		31.349	20.093	99	88	31	29	26	26	129500000	131960000	329070000	438420000	32	>sp|Q9NTI5|PDS5B_HUMAN Sister chromatid cohesion protein PDS5 homolog B OS=Homo sapiens GN=PDS5B PE=1 SV=1
P30414	NKTR	NK-tumor recognition protein	-0.133037	-0.324926	-0.225794		17.504	15.781	8	10	3	5	3	5	7319700	6408600	26487000	36826000	5.4	>sp|P30414|NKTR_HUMAN NK-tumor recognition protein OS=Homo sapiens GN=NKTR PE=1 SV=2
O76062	TM7SF2	Delta(14)-sterol reductase	-0.375957	-0.0896338	-0.225704		10.934	10.381	23	12	4	2	4	2	18090000	21019000	42585000	51593000	16	>sp|O76062|ERG24_HUMAN Delta(14)-sterol reductase OS=Homo sapiens GN=TM7SF2 PE=2 SV=3
P26373	RPL13	60S ribosomal protein L13	-0.490365	-0.00187428	-0.225543		13.94	13.654	75	73	6	8	6	8	483690000	627090000	2799500000	3337400000	33.6	>sp|P26373|RL13_HUMAN 60S ribosomal protein L13 OS=Homo sapiens GN=RPL13 PE=1 SV=4
Q9BY49	PECR	Peroxisomal trans-2-enoyl-CoA reductase	-0.262193	-0.189793	-0.225539		15.814	19.89	34	36	12	11	12	11	45738000	48199000	165370000	200990000	60.1	>sp|Q9BY49|PECR_HUMAN Peroxisomal trans-2-enoyl-CoA reductase OS=Homo sapiens GN=PECR PE=1 SV=2
P38432	COIL	Coilin	-0.200379	-0.250719	-0.225329		14.718	16.366	52	31	10	8	10	8	67852000	67275000	97939000	129050000	29.7	>sp|P38432|COIL_HUMAN Coilin OS=Homo sapiens GN=COIL PE=1 SV=1
P22748	CA4	Carbonic anhydrase 4	-0.199248	-0.251689	-0.22523		16.683	15.053	34	25	8	8	8	8	93282000	88165000	161010000	211650000	38.1	>sp|P22748|CAH4_HUMAN Carbonic anhydrase 4 OS=Homo sapiens GN=CA4 PE=1 SV=2
Q8IY17	PNPLA6	Neuropathy target esterase	-0.43808	-0.0388575	-0.224703		24.826	23.097	55	64	15	17	15	16	40870000	48925000	156590000	174750000	24.7	>sp|Q8IY17|PLPL6_HUMAN Neuropathy target esterase OS=Homo sapiens GN=PNPLA6 PE=1 SV=2
P56199	ITGA1	Integrin alpha-1	-0.0676387	-0.400757	-0.224604		26.846	24.141	32	35	17	14	17	14	44723000	40160000	109990000	159810000	19.7	>sp|P56199|ITA1_HUMAN Integrin alpha-1 OS=Homo sapiens GN=ITGA1 PE=1 SV=2
P62917	RPL8	60S ribosomal protein L8	-0.424385	-0.0487942	-0.224401		26.815	15.448	130	88	12	9	12	9	1029600000	1263700000	2993500000	3399500000	45.1	>sp|P62917|RL8_HUMAN 60S ribosomal protein L8 OS=Homo sapiens GN=RPL8 PE=1 SV=2
Q9Y6N7	ROBO1	Roundabout homolog 1	-0.460166	-0.0201999	-0.223476		14.656	28.686	9	6	3	4	3	4	1486000	1462300	9553700	9372500	4.6	>sp|Q9Y6N7|ROBO1_HUMAN Roundabout homolog 1 OS=Homo sapiens GN=ROBO1 PE=1 SV=1
P30049	ATP5D	ATP synthase subunit delta, mitochondrial	-0.213627	-0.233029	-0.223296		17.023	19.749	16	34	3	3	3	3	305980000	306660000	1118000000	1500900000	22.6	>sp|P30049|ATPD_HUMAN ATP synthase subunit delta, mitochondrial OS=Homo sapiens GN=ATP5D PE=1 SV=2
O95249	GOSR1	Golgi SNAP receptor complex member 1	-0.318461	-0.133432	-0.222982		19.359	21.704	28	14	8	10	8	10	55269000	65640000	89349000	104540000	42.4	>sp|O95249|GOSR1_HUMAN Golgi SNAP receptor complex member 1 OS=Homo sapiens GN=GOSR1 PE=1 SV=1
Q9NVC6	MED17	Mediator of RNA polymerase II transcription subunit 17	-0.0522768	-0.416083	-0.222743		15.766	24.498	13	9	4	5	4	5	10883000	9468000	14883000	20937000	16.1	>sp|Q9NVC6|MED17_HUMAN Mediator of RNA polymerase II transcription subunit 17 OS=Homo sapiens GN=MED17 PE=1 SV=2
Q06265	EXOSC9	Exosome complex component RRP45	-0.106884	-0.347439	-0.222154		15.592	17.005	14	19	5	4	5	4	17035000	15726000	38691000	51379000	18.5	>sp|Q06265|EXOS9_HUMAN Exosome complex component RRP45 OS=Homo sapiens GN=EXOSC9 PE=1 SV=3
Q96CW1	AP2M1	AP-2 complex subunit mu	-0.306729	-0.142087	-0.22206		18.406	20.985	56	78	15	16	15	16	107020000	116990000	412380000	513460000	40	>sp|Q96CW1|AP2M1_HUMAN AP-2 complex subunit mu OS=Homo sapiens GN=AP2M1 PE=1 SV=2
Q5HYK3	COQ5	2-methoxy-6-polyprenyl-1,4-benzoquinol methylase, mitochondrial	-0.399007	-0.0641931	-0.221909		10.007	13.559	7	16	6	9	6	9	12917000	14902000	45306000	51273000	45.3	>sp|Q5HYK3|COQ5_HUMAN 2-methoxy-6-polyprenyl-1,4-benzoquinol methylase, mitochondrial OS=Homo sapiens GN=COQ5 PE=1 SV=2
Q9UM00	TMCO1	Transmembrane and coiled-coil domain-containing protein 1	-0.535058	0.0355495	-0.221725		20.306	16.273	18	24	3	3	3	3	117740000	149010000	554090000	637060000	16.5	>sp|Q9UM00|TMCO1_HUMAN Transmembrane and coiled-coil domain-containing protein 1 OS=Homo sapiens GN=TMCO1 PE=1 SV=1
P78504	JAG1	Protein jagged-1	-0.0581087	-0.405121	-0.221207		18.751	29.008	42	33	12	12	12	12	52861000	49437000	59505000	83667000	18.1	>sp|P78504|JAG1_HUMAN Protein jagged-1 OS=Homo sapiens GN=JAG1 PE=1 SV=3
Q9H4L5	OSBPL3	Oxysterol-binding protein-related protein 3	-0.452068	-0.0219061	-0.221014		24.064	23.241	11	19	7	9	7	9	8972400	9977900	53993000	28877000	20.4	>sp|Q9H4L5|OSBL3_HUMAN Oxysterol-binding protein-related protein 3 OS=Homo sapiens GN=OSBPL3 PE=1 SV=1
Q5C9Z4	NOM1	Nucleolar MIF4G domain-containing protein 1	-0.316841	-0.131063	-0.220963		15.954	17.475	17	19	4	7	4	7	9694300	9905700	26809000	32747000	12.4	>sp|Q5C9Z4|NOM1_HUMAN Nucleolar MIF4G domain-containing protein 1 OS=Homo sapiens GN=NOM1 PE=1 SV=1
Q9UJZ1	STOML2	Stomatin-like protein 2, mitochondrial	-0.357496	-0.0959919	-0.220827		21.384	19.245	183	176	19	18	19	18	889090000	1025000000	2125300000	2453200000	64.6	>sp|Q9UJZ1|STML2_HUMAN Stomatin-like protein 2, mitochondrial OS=Homo sapiens GN=STOML2 PE=1 SV=1
Q5UIP0	RIF1	Telomere-associated protein RIF1	-0.133564	-0.313594	-0.220772		21.555	15.817	42	44	17	22	17	22	22683000	23228000	79404000	109590000	17.9	>sp|Q5UIP0|RIF1_HUMAN Telomere-associated protein RIF1 OS=Homo sapiens GN=RIF1 PE=1 SV=2
Q8TAE8	GADD45GIP1	Growth arrest and DNA damage-inducible proteins-interacting protein 1	-0.2529	-0.188781	-0.220484		35.361	13.537	29	25	6	6	6	6	26747000	30946000	62695000	84947000	35.6	>sp|Q8TAE8|G45IP_HUMAN Growth arrest and DNA damage-inducible proteins-interacting protein 1 OS=Homo sapiens GN=GADD45GIP1 PE=1 SV=1
Q02880	TOP2B	DNA topoisomerase 2-beta	-0.268315	-0.174023	-0.220398		23.023	25.358	223	240	51	54	36	40	381210000	404610000	1331000000	1646400000	47.2	>sp|Q02880|TOP2B_HUMAN DNA topoisomerase 2-beta OS=Homo sapiens GN=TOP2B PE=1 SV=3
Q9NS69	TOMM22	Mitochondrial import receptor subunit TOM22 homolog	-0.27858	-0.162597	-0.219423		18.917	14.511	108	70	7	6	7	6	606070000	650980000	981930000	1265500000	77.5	>sp|Q9NS69|TOM22_HUMAN Mitochondrial import receptor subunit TOM22 homolog OS=Homo sapiens GN=TOMM22 PE=1 SV=3
Q96ME7	ZNF512	Zinc finger protein 512	-0.146916	-0.295606	-0.219346		21.73	17.983	17	3	7	3	7	3	22532000	21252000	15867000	23037000	24.3	>sp|Q96ME7|ZN512_HUMAN Zinc finger protein 512 OS=Homo sapiens GN=ZNF512 PE=1 SV=2
Q9Y5J1	UTP18	U3 small nucleolar RNA-associated protein 18 homolog	-0.382833	-0.0709388	-0.218474		17.889	20.337	26	21	10	9	10	9	24222000	27252000	72936000	87740000	27.3	>sp|Q9Y5J1|UTP18_HUMAN U3 small nucleolar RNA-associated protein 18 homolog OS=Homo sapiens GN=UTP18 PE=1 SV=3
Q96E11	MRRF	Ribosome-recycling factor, mitochondrial	-0.245982	-0.190678	-0.218065		28.597	29.282	61	50	9	9	9	9	99071000	99513000	191810000	223670000	46.2	>sp|Q96E11|RRFM_HUMAN Ribosome-recycling factor, mitochondrial OS=Homo sapiens GN=MRRF PE=1 SV=1
Q9NZW5	MPP6	MAGUK p55 subfamily member 6	-0.225892	-0.21014	-0.217994		14	23.602	90	79	20	21	19	20	147150000	153120000	384840000	492530000	49.4	>sp|Q9NZW5|MPP6_HUMAN MAGUK p55 subfamily member 6 OS=Homo sapiens GN=MPP6 PE=1 SV=2
Q15800	MSMO1	Methylsterol monooxygenase 1	-0.468635	-0.00331438	-0.217295		14.501	21.028	36	31	3	3	3	3	115750000	141610000	315930000	323750000	12.6	>sp|Q15800|MSMO1_HUMAN Methylsterol monooxygenase 1 OS=Homo sapiens GN=MSMO1 PE=1 SV=1
Q9GZM5	YIPF3	Protein YIPF3	-0.466549	-0.00475299	-0.217252		13.376	10.053	16	16	5	4	5	4	23471000	27210000	73772000	76880000	17.7	>sp|Q9GZM5|YIPF3_HUMAN Protein YIPF3 OS=Homo sapiens GN=YIPF3 PE=1 SV=1
P62424	RPL7A	60S ribosomal protein L7a	-0.454702	-0.0132121	-0.217135		21.431	26.806	151	152	16	14	16	14	1025900000	1264900000	4025300000	4547500000	44.7	>sp|P62424|RL7A_HUMAN 60S ribosomal protein L7a OS=Homo sapiens GN=RPL7A PE=1 SV=2
Q8WVC6	DCAKD	Dephospho-CoA kinase domain-containing protein	-0.311271	-0.128162	-0.216813		13.602	17.571	3	4	2	4	2	4	7147100	7000300	52616000	29586000	18.6	>sp|Q8WVC6|DCAKD_HUMAN Dephospho-CoA kinase domain-containing protein OS=Homo sapiens GN=DCAKD PE=1 SV=1
A6NHR9	SMCHD1	Structural maintenance of chromosomes flexible hinge domain-containing protein 1	-0.100709	-0.342327	-0.216466		40.203	23.235	120	130	47	52	47	52	115090000	112580000	532680000	725860000	41.7	>sp|A6NHR9|SMHD1_HUMAN Structural maintenance of chromosomes flexible hinge domain-containing protein 1 OS=Homo sapiens GN=SMCHD1 PE=1 SV=2
P46779	RPL28	60S ribosomal protein L28	-0.501006	0.0212479	-0.216375		41.458	21.277	26	35	5	8	5	8	173680000	226650000	769970000	869450000	51.1	>sp|P46779|RL28_HUMAN 60S ribosomal protein L28 OS=Homo sapiens GN=RPL28 PE=1 SV=3
Q4ZIN3	TMEM259	Membralin	-0.616452	0.0977644	-0.215591		15.06	15.153	2	10	2	5	2	5	565330	979500	17066000	18865000	9.4	>sp|Q4ZIN3|MBRL_HUMAN Membralin OS=Homo sapiens GN=TMEM259 PE=1 SV=1
Q8N8J7	C4orf32	Uncharacterized protein C4orf32	-0.166458	-0.265557	-0.215157		21.144	9.3178	7	4	2	2	2	2	15790000	14857000	3881500	4836900	37.9	>sp|Q8N8J7|CD032_HUMAN Uncharacterized protein C4orf32 OS=Homo sapiens GN=C4orf32 PE=2 SV=2
Q9ULK4	MED23	Mediator of RNA polymerase II transcription subunit 23	-0.123269	-0.312897	-0.21497		16.847	54.155	13	17	7	13	7	13	7085800	7397400	33989000	47567000	15	>sp|Q9ULK4|MED23_HUMAN Mediator of RNA polymerase II transcription subunit 23 OS=Homo sapiens GN=MED23 PE=1 SV=2
Q92667	AKAP1	A-kinase anchor protein 1, mitochondrial	-0.390888	-0.0581087	-0.214924		21.215	27.254	89	88	22	27	22	27	165740000	180550000	416300000	477330000	46.6	>sp|Q92667|AKAP1_HUMAN A-kinase anchor protein 1, mitochondrial OS=Homo sapiens GN=AKAP1 PE=1 SV=1
O94766	B3GAT3	Galactosylgalactosylxylosylprotein 3-beta-glucuronosyltransferase 3	-0.354903	-0.0873271	-0.214921		51.829	17.166	16	17	6	5	6	5	58177000	59786000	146680000	180550000	24.2	>sp|O94766|B3GA3_HUMAN Galactosylgalactosylxylosylprotein 3-beta-glucuronosyltransferase 3 OS=Homo sapiens GN=B3GAT3 PE=1 SV=2
P08754	GNAI3	Guanine nucleotide-binding protein G(k) subunit alpha	-0.135009	-0.29901	-0.214681		19.198	17.933	49	56	9	7	9	7	164430000	147380000	290640000	432730000	52	>sp|P08754|GNAI3_HUMAN Guanine nucleotide-binding protein G(k) subunit alpha OS=Homo sapiens GN=GNAI3 PE=1 SV=3
Q9UL25	RAB21	Ras-related protein Rab-21	-0.30147	-0.132116	-0.21431		22.264	20.67	61	48	11	6	11	6	230210000	213240000	406940000	487520000	52.9	>sp|Q9UL25|RAB21_HUMAN Ras-related protein Rab-21 OS=Homo sapiens GN=RAB21 PE=1 SV=3
Q96DZ1	ERLEC1	Endoplasmic reticulum lectin 1	-0.229711	-0.19862	-0.214082		18.321	32.76	38	30	10	13	10	13	44630000	46161000	98796000	113380000	37.3	>sp|Q96DZ1|ERLEC_HUMAN Endoplasmic reticulum lectin 1 OS=Homo sapiens GN=ERLEC1 PE=1 SV=1
Q8NI27	THOC2	THO complex subunit 2	-0.174279	-0.254836	-0.213995		20.118	29.241	123	115	34	28	34	28	157890000	158750000	416920000	548420000	30.3	>sp|Q8NI27|THOC2_HUMAN THO complex subunit 2 OS=Homo sapiens GN=THOC2 PE=1 SV=2
Q8N4T8	CBR4	Carbonyl reductase family member 4	-0.162339	-0.267356	-0.213892		40.363	129.15	5	3	4	2	4	2	7563200	9328600	35187000	24513000	23.2	>sp|Q8N4T8|CBR4_HUMAN Carbonyl reductase family member 4 OS=Homo sapiens GN=CBR4 PE=1 SV=3
Q9H9Y6	POLR1B	DNA-directed RNA polymerase I subunit RPA2	-0.308827	-0.124196	-0.21356		35.568	19.892	43	44	17	17	17	17	36214000	42115000	133200000	168970000	25.9	>sp|Q9H9Y6|RPA2_HUMAN DNA-directed RNA polymerase I subunit RPA2 OS=Homo sapiens GN=POLR1B PE=1 SV=2
Q69YN4	KIAA1429	Protein virilizer homolog	-0.184852	-0.242572	-0.213423		22.375	21.566	90	72	28	21	28	21	65179000	64559000	132040000	170940000	27.9	>sp|Q69YN4|VIR_HUMAN Protein virilizer homolog OS=Homo sapiens GN=KIAA1429 PE=1 SV=2
O00148	DDX39A	ATP-dependent RNA helicase DDX39A	-0.228603	-0.19774	-0.213089		27.485	16.343	111	108	11	9	11	9	278190000	286820000	753630000	963980000	65.8	>sp|O00148|DX39A_HUMAN ATP-dependent RNA helicase DDX39A OS=Homo sapiens GN=DDX39A PE=1 SV=2
Q92982	NINJ1	Ninjurin-1	-0.247198	-0.179384	-0.212893		14.112	14.046	28	16	2	2	2	2	10092000	10830000	39863000	46523000	21.7	>sp|Q92982|NINJ1_HUMAN Ninjurin-1 OS=Homo sapiens GN=NINJ1 PE=1 SV=2
Q9NU22	MDN1	Midasin	-0.251204	-0.175557	-0.212885		22.186	23.618	186	225	81	79	80	78	151050000	156060000	617700000	684390000	27.9	>sp|Q9NU22|MDN1_HUMAN Midasin OS=Homo sapiens GN=MDN1 PE=1 SV=2
P53355	DAPK1	Death-associated protein kinase 1	-0.110764	-0.322505	-0.212753		14.614	22.289	6	5	3	4	3	4	4186900	4210000	4318400	5244700	7.1	>sp|P53355|DAPK1_HUMAN Death-associated protein kinase 1 OS=Homo sapiens GN=DAPK1 PE=1 SV=6
Q8NEN9	PDZD8	PDZ domain-containing protein 8	-0.356144	-0.0822938	-0.212731		32.928	23.17	5	15	3	6	3	6	8761500	10855000	22540000	26649000	10.1	>sp|Q8NEN9|PDZD8_HUMAN PDZ domain-containing protein 8 OS=Homo sapiens GN=PDZD8 PE=1 SV=1
Q9Y2V7	COG6	Conserved oligomeric Golgi complex subunit 6	-0.29443	-0.135009	-0.212519		58.437	30.687	11	21	5	7	5	7	11773000	10602000	40743000	41667000	26.6	>sp|Q9Y2V7|COG6_HUMAN Conserved oligomeric Golgi complex subunit 6 OS=Homo sapiens GN=COG6 PE=1 SV=2
P40926	MDH2	Malate dehydrogenase, mitochondrial	-0.217107	-0.207768	-0.21243		23.004	15.534	273	300	20	17	20	17	8221400000	8018200000	18656000000	24707000000	68	>sp|P40926|MDHM_HUMAN Malate dehydrogenase, mitochondrial OS=Homo sapiens GN=MDH2 PE=1 SV=3
Q8N490	PNKD	Probable hydrolase PNKD	-0.369941	-0.070252	-0.212329		28.618	29.881	12	11	4	4	4	4	16511000	18149000	17739000	24431000	20.8	>sp|Q8N490|PNKD_HUMAN Probable hydrolase PNKD OS=Homo sapiens GN=PNKD PE=1 SV=2
Q96FV9	THOC1	THO complex subunit 1	-0.141302	-0.286881	-0.212256		19.486	20.916	71	62	23	23	23	23	115160000	110300000	244210000	324330000	57.4	>sp|Q96FV9|THOC1_HUMAN THO complex subunit 1 OS=Homo sapiens GN=THOC1 PE=1 SV=1
Q5JRA6	MIA3	Melanoma inhibitory activity protein 3	-0.319965	-0.111565	-0.212005		24.838	19.837	164	162	44	46	44	46	263310000	307740000	611320000	734800000	46.7	>sp|Q5JRA6|MIA3_HUMAN Melanoma inhibitory activity protein 3 OS=Homo sapiens GN=MIA3 PE=1 SV=1
Q9BXY0	MAK16	Protein MAK16 homolog	-0.0949116	-0.336969	-0.21087		32.312	19.548	28	30	6	8	6	8	49058000	54062000	137870000	184170000	32	>sp|Q9BXY0|MAK16_HUMAN Protein MAK16 homolog OS=Homo sapiens GN=MAK16 PE=1 SV=2
O15020	SPTBN2	Spectrin beta chain, non-erythrocytic 2	-0.285461	-0.139862	-0.210826		24.811	24.572	273	319	78	76	78	76	503440000	547910000	1315600000	1606700000	52.6	>sp|O15020|SPTN2_HUMAN Spectrin beta chain, non-erythrocytic 2 OS=Homo sapiens GN=SPTBN2 PE=1 SV=3
Q9H9S5	FKRP	Fukutin-related protein	-0.33411	-0.0968015	-0.210582		6.6584	17.728	4	4	3	3	3	3	1095900	1440100	3904800	5144000	16	>sp|Q9H9S5|FKRP_HUMAN Fukutin-related protein OS=Homo sapiens GN=FKRP PE=1 SV=1
Q9Y3L5	RAP2C	Ras-related protein Rap-2c	-0.286763	-0.138028	-0.21048		27.668	15.986	24	29	4	5	4	5	30698000	27893000	104090000	122660000	60.1	>sp|Q9Y3L5|RAP2C_HUMAN Ras-related protein Rap-2c OS=Homo sapiens GN=RAP2C PE=1 SV=1
Q92542	NCSTN	Nicastrin	-0.209391	-0.211386	-0.210388		35.953	16.5	43	33	9	7	9	7	87383000	87362000	349700000	470310000	19.7	>sp|Q92542|NICA_HUMAN Nicastrin OS=Homo sapiens GN=NCSTN PE=1 SV=2
Q86X10	RALGAPB	Ral GTPase-activating protein subunit beta	-0.410775	-0.0343565	-0.210324		14.66	20.22	5	5	2	3	2	3	738180	853730	6656100	6929400	4.1	>sp|Q86X10|RLGPB_HUMAN Ral GTPase-activating protein subunit beta OS=Homo sapiens GN=RALGAPB PE=1 SV=1
Q8N0V3	RBFA	Putative ribosome-binding factor A, mitochondrial	-0.160662	-0.261591	-0.210244		16.199	18.023	16	9	2	2	2	2	1861500	1979500	1919700	2333400	12.8	>sp|Q8N0V3|RBFA_HUMAN Putative ribosome-binding factor A, mitochondrial OS=Homo sapiens GN=RBFA PE=1 SV=3
O43913	ORC5	Origin recognition complex subunit 5	-0.123269	-0.302407	-0.210059		17.381	19.507	26	25	8	9	8	9	19517000	18405000	38267000	52749000	31.3	>sp|O43913|ORC5_HUMAN Origin recognition complex subunit 5 OS=Homo sapiens GN=ORC5 PE=1 SV=1
P04062	GBA	Glucosylceramidase	-0.212881	-0.205643	-0.209257		21.25	30.505	105	72	14	13	14	13	212190000	231930000	611670000	738290000	41.2	>sp|P04062|GLCM_HUMAN Glucosylceramidase OS=Homo sapiens GN=GBA PE=1 SV=3
O15226	NKRF	NF-kappa-B-repressing factor	-0.280838	-0.140648	-0.20904		35.181	17.476	30	44	16	15	16	15	21303000	22582000	97794000	119480000	34.6	>sp|O15226|NKRF_HUMAN NF-kappa-B-repressing factor OS=Homo sapiens GN=NKRF PE=1 SV=2
O75947	ATP5H	ATP synthase subunit d, mitochondrial	-0.224781	-0.193204	-0.208906		16.015	27.185	204	179	13	14	13	14	1477900000	1572800000	3213900000	4112100000	79.5	>sp|O75947|ATP5H_HUMAN ATP synthase subunit d, mitochondrial OS=Homo sapiens GN=ATP5H PE=1 SV=3
P62341	SELT	Selenoprotein T	-0.365581	-0.0668125	-0.208476		16.922	15.323	16	13	5	4	5	4	26972000	27839000	67514000	82202000	32.3	>sp|P62341|SELT_HUMAN Selenoprotein T OS=Homo sapiens GN=SELT PE=2 SV=2
Q7Z3B4	NUP54	Nucleoporin p54	-0.234869	-0.182438	-0.208415		18.766	15.825	49	71	15	14	15	14	138900000	138010000	418180000	524020000	43.8	>sp|Q7Z3B4|NUP54_HUMAN Nucleoporin p54 OS=Homo sapiens GN=NUP54 PE=1 SV=2
Q7Z2E3	APTX	Aprataxin	-0.396598	-0.0413831	-0.208086		24.381	23.028	6	3	5	2	5	2	8705000	9327800	16119000	16212000	23.6	>sp|Q7Z2E3|APTX_HUMAN Aprataxin OS=Homo sapiens GN=APTX PE=1 SV=2
Q99569	PKP4	Plakophilin-4	-0.203765	-0.21176	-0.207757		26.498	22.301	27	28	15	11	14	10	18500000	20584000	32114000	43377000	20.2	>sp|Q99569|PKP4_HUMAN Plakophilin-4 OS=Homo sapiens GN=PKP4 PE=1 SV=2
Q5VV42	CDKAL1	Threonylcarbamoyladenosine tRNA methylthiotransferase	-0.324811	-0.0984196	-0.207179		24.127	17.49	4	3	2	2	2	2	905810	1160300	3869700	3376500	11.9	>sp|Q5VV42|CDKAL_HUMAN Threonylcarbamoyladenosine tRNA methylthiotransferase OS=Homo sapiens GN=CDKAL1 PE=1 SV=1
Q96S97	MYADM	Myeloid-associated differentiation marker	-0.247442	-0.167615	-0.206976		13.696	12.451	23	12	3	3	3	3	26199000	28152000	21340000	27543000	13.7	>sp|Q96S97|MYADM_HUMAN Myeloid-associated differentiation marker OS=Homo sapiens GN=MYADM PE=1 SV=2
Q96AB3	ISOC2	Isochorismatase domain-containing protein 2, mitochondrial	-0.185486	-0.228234	-0.206702		14.303	12.876	41	16	6	4	6	4	74757000	77365000	77155000	93410000	52.7	>sp|Q96AB3|ISOC2_HUMAN Isochorismatase domain-containing protein 2, mitochondrial OS=Homo sapiens GN=ISOC2 PE=1 SV=1
Q16595	FXN	Frataxin, mitochondrial	-0.158854	-0.256165	-0.206689		22.451	24.076	26	31	6	7	6	7	63527000	62415000	119690000	169790000	44.8	>sp|Q16595|FRDA_HUMAN Frataxin, mitochondrial OS=Homo sapiens GN=FXN PE=1 SV=2
Q8WWQ0	PHIP	PH-interacting protein	-0.166073	-0.247685	-0.206301		22.877	24.074	45	50	18	18	17	16	52718000	78615000	106700000	138400000	18.3	>sp|Q8WWQ0|PHIP_HUMAN PH-interacting protein OS=Homo sapiens GN=PHIP PE=1 SV=2
P42766	RPL35	60S ribosomal protein L35	-0.345623	-0.0790197	-0.206172		20.814	9.789	31	34	3	3	3	3	225210000	242180000	984190000	1176100000	18.7	>sp|P42766|RL35_HUMAN 60S ribosomal protein L35 OS=Homo sapiens GN=RPL35 PE=1 SV=2
Q53EP0	FNDC3B	Fibronectin type III domain-containing protein 3B	-0.465504	0.014077	-0.205877		79.153	52.95	8	4	5	2	5	2	3958500	4363200	2582000	2692300	6.4	>sp|Q53EP0|FND3B_HUMAN Fibronectin type III domain-containing protein 3B OS=Homo sapiens GN=FNDC3B PE=1 SV=2
Q9UKF6	CPSF3	Cleavage and polyadenylation specificity factor subunit 3	-0.187134	-0.224781	-0.205835		33.286	14.563	47	44	14	15	14	15	81400000	80719000	195050000	237370000	41.8	>sp|Q9UKF6|CPSF3_HUMAN Cleavage and polyadenylation specificity factor subunit 3 OS=Homo sapiens GN=CPSF3 PE=1 SV=1
P61254	RPL26	60S ribosomal protein L26	-0.539332	0.0656119	-0.205382		22.402	12.848	38	67	6	7	0	1	334460000	420370000	2417100000	2688200000	38.6	>sp|P61254|RL26_HUMAN 60S ribosomal protein L26 OS=Homo sapiens GN=RPL26 PE=1 SV=1
Q9BUP3	HTATIP2	Oxidoreductase HTATIP2	-0.241596	-0.168899	-0.20479		29.169	17.66	61	56	15	15	15	15	178080000	198660000	414050000	496020000	59.5	>sp|Q9BUP3|HTAI2_HUMAN Oxidoreductase HTATIP2 OS=Homo sapiens GN=HTATIP2 PE=1 SV=2
Q9BZH6	WDR11	WD repeat-containing protein 11	-0.369718	-0.0539454	-0.203209		45.378	25.944	29	19	12	8	12	8	18319000	21643000	39448000	44553000	19.4	>sp|Q9BZH6|WDR11_HUMAN WD repeat-containing protein 11 OS=Homo sapiens GN=WDR11 PE=1 SV=1
Q8N5N7	MRPL50	39S ribosomal protein L50, mitochondrial	-0.237441	-0.169155	-0.202894		17.049	27.784	30	32	7	7	7	7	93537000	97190000	166330000	210300000	56.3	>sp|Q8N5N7|RM50_HUMAN 39S ribosomal protein L50, mitochondrial OS=Homo sapiens GN=MRPL50 PE=1 SV=2
Q86UP2	KTN1	Kinectin	-0.176195	-0.229219	-0.202463		35.131	19.225	519	566	85	86	85	85	2340000000	2214900000	6172500000	7697200000	66.1	>sp|Q86UP2|KTN1_HUMAN Kinectin OS=Homo sapiens GN=KTN1 PE=1 SV=1
Q8NHG7	SVIP	Small VCP/p97-interacting protein	-0.24306	-0.162597	-0.202267		9.1978	10.353	9	14	2	2	2	2	47597000	44230000	131620000	154370000	32.5	>sp|Q8NHG7|SVIP_HUMAN Small VCP/p97-interacting protein OS=Homo sapiens GN=SVIP PE=3 SV=1
P18859	ATP5J	ATP synthase-coupling factor 6, mitochondrial	-0.257131	-0.148999	-0.202052		27.678	14.933	71	76	7	6	7	6	700610000	719300000	1867000000	2299600000	55.6	>sp|P18859|ATP5J_HUMAN ATP synthase-coupling factor 6, mitochondrial OS=Homo sapiens GN=ATP5J PE=1 SV=1
P18077	RPL35A	60S ribosomal protein L35a	-0.499068	0.0444193	-0.201882		12.357	15.422	23	30	6	5	6	5	79485000	83093000	881370000	977010000	42.7	>sp|P18077|RL35A_HUMAN 60S ribosomal protein L35a OS=Homo sapiens GN=RPL35A PE=1 SV=2
P22087	FBL	rRNA 2-O-methyltransferase fibrillarin	-0.341303	-0.0746424	-0.20182		30.248	51.316	120	133	19	13	17	12	977420000	1020200000	3028300000	3447900000	63.6	>sp|P22087|FBRL_HUMAN rRNA 2-O-methyltransferase fibrillarin OS=Homo sapiens GN=FBL PE=1 SV=2
Q9Y5J6	TIMM10B	Mitochondrial import inner membrane translocase subunit Tim10 B	-0.0557509	-0.362891	-0.201163		18.035	9.4921	22	14	4	3	4	3	35959000	32823000	52806000	71173000	56.3	>sp|Q9Y5J6|T10B_HUMAN Mitochondrial import inner membrane translocase subunit Tim10 B OS=Homo sapiens GN=TIMM10B PE=1 SV=1
Q96A33	CCDC47	Coiled-coil domain-containing protein 47	-0.294194	-0.112366	-0.200418		22.609	29.896	232	180	20	19	20	19	648500000	702850000	1185100000	1362200000	47.8	>sp|Q96A33|CCD47_HUMAN Coiled-coil domain-containing protein 47 OS=Homo sapiens GN=CCDC47 PE=1 SV=1
Q2TAY7	SMU1	WD40 repeat-containing protein SMU1	-0.171335	-0.229711	-0.200228		17.515	15.211	78	69	15	16	15	16	167360000	161120000	405950000	521840000	49.7	>sp|Q2TAY7|SMU1_HUMAN WD40 repeat-containing protein SMU1 OS=Homo sapiens GN=SMU1 PE=1 SV=2
Q9NPH3	IL1RAP	Interleukin-1 receptor accessory protein	-0.232047	-0.16877	-0.200062		11.18	17.222	10	12	3	6	3	6	5642200	6197500	20290000	23093000	10.5	>sp|Q9NPH3|IL1AP_HUMAN Interleukin-1 receptor accessory protein OS=Homo sapiens GN=IL1RAP PE=1 SV=2
O60870	KIN	DNA/RNA-binding protein KIN17	-0.262553	-0.139993	-0.199972		24.02	20.68	11	11	7	6	7	6	6569900	8151900	285030000	354430000	24.4	>sp|O60870|KIN17_HUMAN DNA/RNA-binding protein KIN17 OS=Homo sapiens GN=KIN PE=1 SV=2
P38646	HSPA9	Stress-70 protein, mitochondrial	-0.237074	-0.163499	-0.199817		25.315	18.184	757	763	42	43	41	42	10469000000	10427000000	29234000000	37421000000	65.2	>sp|P38646|GRP75_HUMAN Stress-70 protein, mitochondrial OS=Homo sapiens GN=HSPA9 PE=1 SV=2
Q96HQ2	CDKN2AIPNL	CDKN2AIP N-terminal-like protein	-0.148869	-0.252416	-0.199714		22.817	15.647	30	30	5	5	5	5	45598000	43378000	103440000	137830000	52.6	>sp|Q96HQ2|C2AIL_HUMAN CDKN2AIP N-terminal-like protein OS=Homo sapiens GN=CDKN2AIPNL PE=1 SV=1
P11166	SLC2A1	Solute carrier family 2, facilitated glucose transporter member 1	-0.307662	-0.0988237	-0.199467		17.412	10.085	37	22	6	7	6	7	72353000	78692000	159320000	216100000	13.8	>sp|P11166|GTR1_HUMAN Solute carrier family 2, facilitated glucose transporter member 1 OS=Homo sapiens GN=SLC2A1 PE=1 SV=2
Q7Z434	MAVS	Mitochondrial antiviral-signaling protein	-0.261952	-0.138159	-0.198728		18.382	32.546	136	78	13	13	13	13	296750000	308030000	423240000	527440000	59.3	>sp|Q7Z434|MAVS_HUMAN Mitochondrial antiviral-signaling protein OS=Homo sapiens GN=MAVS PE=1 SV=2
Q9NX58	LYAR	Cell growth-regulating nucleolar protein	-0.111298	-0.291604	-0.198636		23.92	19.843	163	134	24	18	24	18	470550000	427860000	909150000	1282400000	57.3	>sp|Q9NX58|LYAR_HUMAN Cell growth-regulating nucleolar protein OS=Homo sapiens GN=LYAR PE=1 SV=2
P14384	CPM	Carboxypeptidase M	-0.116498	-0.284988	-0.198285		20.622	17.821	61	46	9	11	9	11	70886000	70827000	184030000	256460000	31.6	>sp|P14384|CBPM_HUMAN Carboxypeptidase M OS=Homo sapiens GN=CPM PE=1 SV=2
Q9UMS0	NFU1	NFU1 iron-sulfur cluster scaffold homolog, mitochondrial	-0.112767	-0.288181	-0.19781		19.337	17.037	30	32	5	5	5	5	78804000	76075000	229980000	297460000	26	>sp|Q9UMS0|NFU1_HUMAN NFU1 iron-sulfur cluster scaffold homolog, mitochondrial OS=Homo sapiens GN=NFU1 PE=1 SV=2
Q9UBU9	NXF1	Nuclear RNA export factor 1	-0.397036	-0.0227584	-0.197794		27.378	20.838	92	95	24	23	24	23	152900000	174810000	349350000	432440000	51.7	>sp|Q9UBU9|NXF1_HUMAN Nuclear RNA export factor 1 OS=Homo sapiens GN=NXF1 PE=1 SV=1
P50914	RPL14	60S ribosomal protein L14	-0.411318	-0.0116388	-0.197682		15.412	11.052	63	68	6	5	6	5	510110000	608740000	2204000000	2497600000	27.9	>sp|P50914|RL14_HUMAN 60S ribosomal protein L14 OS=Homo sapiens GN=RPL14 PE=1 SV=4
P46459	NSF	Vesicle-fusing ATPase	-0.373954	-0.038998	-0.196777		18.447	25.256	120	155	27	28	27	28	406660000	463200000	1609200000	1764400000	50.7	>sp|P46459|NSF_HUMAN Vesicle-fusing ATPase OS=Homo sapiens GN=NSF PE=1 SV=3
P34059	GALNS	N-acetylgalactosamine-6-sulfatase	-0.0629506	-0.343692	-0.196503		22.646	24.789	37	37	7	10	7	10	33575000	32139000	82115000	98966000	25.3	>sp|P34059|GALNS_HUMAN N-acetylgalactosamine-6-sulfatase OS=Homo sapiens GN=GALNS PE=1 SV=1
P50579	METAP2	Methionine aminopeptidase 2	-0.297837	-0.101784	-0.196483		18.852	15.402	54	39	14	10	14	10	82185000	78969000	152620000	180040000	54	>sp|P50579|MAP2_HUMAN Methionine aminopeptidase 2 OS=Homo sapiens GN=METAP2 PE=1 SV=1
P62753	RPS6	40S ribosomal protein S6	-0.389897	-0.0255958	-0.196278		47.417	25.636	54	88	9	8	9	8	630210000	725860000	3095400000	3528500000	36.9	>sp|P62753|RS6_HUMAN 40S ribosomal protein S6 OS=Homo sapiens GN=RPS6 PE=1 SV=1
Q96GK7	FAHD2A	Fumarylacetoacetate hydrolase domain-containing protein 2A	-0.204892	-0.187388	-0.196113		17.995	16.947	34	32	7	8	2	3	55740000	56835000	113650000	148380000	47.5	>sp|Q96GK7|FAH2A_HUMAN Fumarylacetoacetate hydrolase domain-containing protein 2A OS=Homo sapiens GN=FAHD2A PE=1 SV=1
P21964	COMT	Catechol O-methyltransferase	-0.289834	-0.107286	-0.195675		13.956	27.521	118	84	14	11	14	11	427230000	465470000	803320000	972610000	69	>sp|P21964|COMT_HUMAN Catechol O-methyltransferase OS=Homo sapiens GN=COMT PE=1 SV=2
P27824	CANX	Calnexin	-0.263635	-0.130535	-0.195551		29.476	22.6	506	407	31	33	31	33	5523700000	5707600000	17441000000	21347000000	52.4	>sp|P27824|CALX_HUMAN Calnexin OS=Homo sapiens GN=CANX PE=1 SV=2
Q8TBA6	GOLGA5	Golgin subfamily A member 5	-0.238175	-0.154065	-0.195507		29.639	24.506	35	46	18	18	18	18	67680000	68668000	112950000	130200000	45.6	>sp|Q8TBA6|GOGA5_HUMAN Golgin subfamily A member 5 OS=Homo sapiens GN=GOLGA5 PE=1 SV=3
P00533	EGFR	Epidermal growth factor receptor	-0.222557	-0.168899	-0.195479		15.296	22.917	261	251	40	38	37	37	851150000	886000000	2175400000	2823500000	53.1	>sp|P00533|EGFR_HUMAN Epidermal growth factor receptor OS=Homo sapiens GN=EGFR PE=1 SV=2
O00330	PDHX	Pyruvate dehydrogenase protein X component, mitochondrial	-0.191563	-0.198871	-0.195212		21.045	23.056	55	87	15	16	15	16	74658000	77960000	423500000	511330000	42.9	>sp|O00330|ODPX_HUMAN Pyruvate dehydrogenase protein X component, mitochondrial OS=Homo sapiens GN=PDHX PE=1 SV=3
Q5BKZ1	ZNF326	DBIRD complex subunit ZNF326	-0.170438	-0.219339	-0.194681		15.363	28.915	190	174	19	19	19	19	633320000	622410000	1234700000	1654700000	41.8	>sp|Q5BKZ1|ZN326_HUMAN DBIRD complex subunit ZNF326 OS=Homo sapiens GN=ZNF326 PE=1 SV=2
Q9NZI7	UBP1	Upstream-binding protein 1	-0.304628	-0.0924781	-0.194657		14.702	14.716	10	7	3	3	3	3	3945500	3632700	9845400	11557000	20.9	>sp|Q9NZI7|UBIP1_HUMAN Upstream-binding protein 1 OS=Homo sapiens GN=UBP1 PE=2 SV=1
Q9HD34	LYRM4	LYR motif-containing protein 4	-0.105276	-0.289716	-0.194551		16.767	13.691	26	23	4	5	4	5	45533000	40853000	154360000	192200000	45.1	>sp|Q9HD34|LYRM4_HUMAN LYR motif-containing protein 4 OS=Homo sapiens GN=LYRM4 PE=1 SV=1
Q9BUE6	ISCA1	Iron-sulfur cluster assembly 1 homolog, mitochondrial	-0.246955	-0.143655	-0.194381		20.12	15.37	10	19	3	5	3	5	30836000	31698000	98953000	118010000	53.5	>sp|Q9BUE6|ISCA1_HUMAN Iron-sulfur cluster assembly 1 homolog, mitochondrial OS=Homo sapiens GN=ISCA1 PE=2 SV=1
Q9BVV7	TIMM21	Mitochondrial import inner membrane translocase subunit Tim21	-0.134221	-0.256286	-0.193963		43.976	30.359	4	7	2	2	2	2	7130800	4323100	20712000	21259000	10.1	>sp|Q9BVV7|TIM21_HUMAN Mitochondrial import inner membrane translocase subunit Tim21 OS=Homo sapiens GN=TIMM21 PE=1 SV=1
Q13443	ADAM9	Disintegrin and metalloproteinase domain-containing protein 9	-0.180148	-0.207393	-0.193706		16.652	23.001	35	24	10	10	10	10	39536000	38200000	43726000	55750000	20	>sp|Q13443|ADAM9_HUMAN Disintegrin and metalloproteinase domain-containing protein 9 OS=Homo sapiens GN=ADAM9 PE=1 SV=1
Q96PK6	RBM14	RNA-binding protein 14	-0.16092	-0.226509	-0.193342		17.321	38.577	257	244	26	23	26	23	1533800000	1586900000	2922900000	3844900000	49.5	>sp|Q96PK6|RBM14_HUMAN RNA-binding protein 14 OS=Homo sapiens GN=RBM14 PE=1 SV=2
Q9BSA9	TMEM175	Transmembrane protein 175	-0.270708	-0.119157	-0.192944		25.117	15.369	11	10	2	2	2	2	3065500	3987200	33045000	43316000	12.5	>sp|Q9BSA9|TM175_HUMAN Transmembrane protein 175 OS=Homo sapiens GN=TMEM175 PE=1 SV=1
Q658Y4	FAM91A1	Protein FAM91A1	-0.436162	0.0154763	-0.192741		32.542	16.917	20	19	10	7	10	7	9502900	11132000	33859000	37622000	25.7	>sp|Q658Y4|F91A1_HUMAN Protein FAM91A1 OS=Homo sapiens GN=FAM91A1 PE=1 SV=3
P62280	RPS11	40S ribosomal protein S11	-0.5431	0.0891905	-0.192589		29.612	20.927	95	102	11	12	11	12	578840000	711320000	2563000000	2818100000	57	>sp|P62280|RS11_HUMAN 40S ribosomal protein S11 OS=Homo sapiens GN=RPS11 PE=1 SV=3
Q86Y39	NDUFA11	NADH dehydrogenase [ubiquinone] 1 alpha subcomplex subunit 11	-0.523462	0.0790969	-0.19095		18.317	21.042	27	24	6	6	6	6	32327000	41297000	95701000	167090000	57.4	>sp|Q86Y39|NDUAB_HUMAN NADH dehydrogenase [ubiquinone] 1 alpha subcomplex subunit 11 OS=Homo sapiens GN=NDUFA11 PE=1 SV=3
Q12955	ANK3	Ankyrin-3	-0.190552	-0.190678	-0.190615		32.833	19.004	39	28	17	16	16	14	33188000	26635000	59453000	59909000	9.2	>sp|Q12955|ANK3_HUMAN Ankyrin-3 OS=Homo sapiens GN=ANK3 PE=1 SV=3
Q9P2R3	ANKFY1	Ankyrin repeat and FYVE domain-containing protein 1	-0.155879	-0.226015	-0.190521		21.617	27.901	40	30	11	10	11	10	27920000	27505000	57853000	69407000	23.1	>sp|Q9P2R3|ANFY1_HUMAN Ankyrin repeat and FYVE domain-containing protein 1 OS=Homo sapiens GN=ANKFY1 PE=1 SV=2
Q9UBD5	ORC3	Origin recognition complex subunit 3	-0.166587	-0.214498	-0.190343		23.047	22.971	39	46	10	13	10	13	29844000	31245000	193420000	236410000	27.8	>sp|Q9UBD5|ORC3_HUMAN Origin recognition complex subunit 3 OS=Homo sapiens GN=ORC3 PE=1 SV=1
Q9UPN3	MACF1	Microtubule-actin cross-linking factor 1, isoforms 1/2/3/5	-0.267716	-0.116498	-0.190126		35.573	23.31	108	129	57	66	57	64	81860000	96350000	309820000	357400000	18.7	>sp|Q9UPN3|MACF1_HUMAN Microtubule-actin cross-linking factor 1, isoforms 1/2/3/5 OS=Homo sapiens GN=MACF1 PE=1 SV=4
Q9UHK6	AMACR	Alpha-methylacyl-CoA racemase	-0.264236	-0.11929	-0.189943		17.574	20.922	62	43	13	10	13	10	65815000	71006000	172760000	188080000	41.6	>sp|Q9UHK6|AMACR_HUMAN Alpha-methylacyl-CoA racemase OS=Homo sapiens GN=AMACR PE=1 SV=2
Q9Y2Z9	COQ6	Ubiquinone biosynthesis monooxygenase COQ6	-0.201885	-0.177981	-0.189884		34.993	16.778	12	39	3	4	3	4	3139300000	2582400000	4278600000	5479500000	9.8	>sp|Q9Y2Z9|COQ6_HUMAN Ubiquinone biosynthesis monooxygenase COQ6 OS=Homo sapiens GN=COQ6 PE=1 SV=2
Q9UHA4	LAMTOR3	Ragulator complex protein LAMTOR3	-0.189666	-0.18954	-0.189603		49.732	20.313	17	16	7	5	7	5	43350000	45014000	113480000	146630000	49.2	>sp|Q9UHA4|LTOR3_HUMAN Ragulator complex protein LAMTOR3 OS=Homo sapiens GN=LAMTOR3 PE=1 SV=1
Q16740	CLPP	Putative ATP-dependent Clp protease proteolytic subunit, mitochondrial	-0.298658	-0.0881416	-0.189563		18.689	16.371	48	66	8	8	8	8	186350000	178360000	428130000	496080000	36.8	>sp|Q16740|CLPP_HUMAN Putative ATP-dependent Clp protease proteolytic subunit, mitochondrial OS=Homo sapiens GN=CLPP PE=1 SV=1
P17706	PTPN2	Tyrosine-protein phosphatase non-receptor type 2	-0.250598	-0.130931	-0.189524		11.749	18.363	12	25	6	11	6	11	22594000	19385000	71809000	88239000	38.1	>sp|P17706|PTN2_HUMAN Tyrosine-protein phosphatase non-receptor type 2 OS=Homo sapiens GN=PTPN2 PE=1 SV=2
P16401	HIST1H1B	Histone H1.5	-0.103397	-0.280362	-0.189168		21.919	27.169	89	118	14	11	10	7	3021500000	2332800000	8604000000	11781000000	39.4	>sp|P16401|H15_HUMAN Histone H1.5 OS=Homo sapiens GN=HIST1H1B PE=1 SV=3
Q86U86	PBRM1	Protein polybromo-1	-0.248171	-0.132116	-0.188977		35.84	17.749	38	37	19	17	19	17	37639000	29285000	76382000	93114000	23.2	>sp|Q86U86|PB1_HUMAN Protein polybromo-1 OS=Homo sapiens GN=PBRM1 PE=1 SV=1
Q04837	SSBP1	Single-stranded DNA-binding protein, mitochondrial	-0.181548	-0.1956	-0.188557		10.028	11.282	107	105	7	7	7	7	1079900000	1075300000	3068000000	3927600000	52	>sp|Q04837|SSBP_HUMAN Single-stranded DNA-binding protein, mitochondrial OS=Homo sapiens GN=SSBP1 PE=1 SV=1
P07093	SERPINE2	Glia-derived nexin	-0.0739573	-0.312665	-0.18838		10.522	15.099	20	17	3	2	3	2	4464100	4101700	7033600	15900000	10.1	>sp|P07093|GDN_HUMAN Glia-derived nexin OS=Homo sapiens GN=SERPINE2 PE=1 SV=1
Q99519	NEU1	Sialidase-1	-0.161823	-0.215119	-0.188225		27.75	22.586	82	76	12	12	12	12	253980000	267740000	611160000	839790000	36.1	>sp|Q99519|NEUR1_HUMAN Sialidase-1 OS=Homo sapiens GN=NEU1 PE=1 SV=1
Q9Y2K7	KDM2A	Lysine-specific demethylase 2A	-0.234011	-0.143524	-0.188058		26.462	24.483	139	113	28	29	28	29	422840000	561200000	794310000	991440000	43.5	>sp|Q9Y2K7|KDM2A_HUMAN Lysine-specific demethylase 2A OS=Homo sapiens GN=KDM2A PE=1 SV=3
Q99757	TXN2	Thioredoxin, mitochondrial	-0.203013	-0.173	-0.187928		33.781	16.359	42	24	5	5	5	5	190520000	187660000	197190000	248970000	37.3	>sp|Q99757|THIOM_HUMAN Thioredoxin, mitochondrial OS=Homo sapiens GN=TXN2 PE=1 SV=2
P47985	UQCRFS1	Cytochrome b-c1 complex subunit Rieske, mitochondrial	-0.315103	-0.0706641	-0.187713		22.426	17.428	88	77	9	11	9	11	301730000	359960000	1051400000	1302400000	39.8	>sp|P47985|UCRI_HUMAN Cytochrome b-c1 complex subunit Rieske, mitochondrial OS=Homo sapiens GN=UQCRFS1 PE=1 SV=2;>sp|P0C7P4|UCRIL_HUMAN Putative cytochrome b-c1 complex subunit Rieske-like protein 1 OS=Homo sapiens GN=UQCRFS1P1 PE=5 SV=1
Q15738	NSDHL	Sterol-4-alpha-carboxylate 3-dehydrogenase, decarboxylating	-0.305912	-0.0781998	-0.187568		18.202	14.933	165	134	15	14	15	14	474160000	509570000	1433100000	1687400000	64.1	>sp|Q15738|NSDHL_HUMAN Sterol-4-alpha-carboxylate 3-dehydrogenase, decarboxylating OS=Homo sapiens GN=NSDHL PE=1 SV=2
O43567	RNF13	E3 ubiquitin-protein ligase RNF13	-0.0201999	-0.376735	-0.187481		75.317	18.423	15	12	4	3	4	3	18852000	15292000	44080000	62819000	10.5	>sp|O43567|RNF13_HUMAN E3 ubiquitin-protein ligase RNF13 OS=Homo sapiens GN=RNF13 PE=1 SV=1
Q9NP72	RAB18	Ras-related protein Rab-18	-0.181548	-0.193078	-0.187301		14.004	14.164	58	92	11	11	11	11	245100000	234110000	566720000	693730000	67.5	>sp|Q9NP72|RAB18_HUMAN Ras-related protein Rab-18 OS=Homo sapiens GN=RAB18 PE=1 SV=1
Q9UBB5	MBD2	Methyl-CpG-binding domain protein 2	0.0887763	-0.528571	-0.187125		30.059	17.248	9	5	3	3	3	3	8129100	7095300	19047000	26676000	24.8	>sp|Q9UBB5|MBD2_HUMAN Methyl-CpG-binding domain protein 2 OS=Homo sapiens GN=MBD2 PE=1 SV=1
O95782	AP2A1	AP-2 complex subunit alpha-1	-0.310805	-0.0725861	-0.186784		34.787	16.644	193	166	38	40	30	30	465740000	503690000	1277700000	1185100000	54.9	>sp|O95782|AP2A1_HUMAN AP-2 complex subunit alpha-1 OS=Homo sapiens GN=AP2A1 PE=1 SV=3
Q01995	TAGLN	Transgelin	-0.173383	-0.199374	-0.18632		21.805	21.128	11	10	5	3	5	3	5862200	6194700	12757000	14619000	27.9	>sp|Q01995|TAGL_HUMAN Transgelin OS=Homo sapiens GN=TAGLN PE=1 SV=4
O43159	RRP8	Ribosomal RNA-processing protein 8	-0.358396	-0.0315363	-0.185729		19.452	24.573	40	48	8	13	8	13	61239000	70818000	167250000	192360000	39.9	>sp|O43159|RRP8_HUMAN Ribosomal RNA-processing protein 8 OS=Homo sapiens GN=RRP8 PE=1 SV=2
Q8IY95	TMEM192	Transmembrane protein 192	-0.346078	-0.0412431	-0.185624		20.293	40.697	20	14	6	4	6	4	21515000	22594000	39296000	42079000	19.6	>sp|Q8IY95|TM192_HUMAN Transmembrane protein 192 OS=Homo sapiens GN=TMEM192 PE=1 SV=1
P50454	SERPINH1	Serpin H1	-0.113834	-0.260869	-0.185479		20.781	17.332	291	197	22	20	22	20	2078200000	1927500000	4018800000	5460900000	62.4	>sp|P50454|SERPH_HUMAN Serpin H1 OS=Homo sapiens GN=SERPINH1 PE=1 SV=2
Q5T3F8	TMEM63B	Transmembrane protein 63B	-0.135929	-0.236217	-0.185202		22.462	20.711	11	6	4	5	4	5	13785000	10949000	4604000	6596200	8.3	>sp|Q5T3F8|TM63B_HUMAN Transmembrane protein 63B OS=Homo sapiens GN=TMEM63B PE=1 SV=1
O14647	CHD2	Chromodomain-helicase-DNA-binding protein 2	-0.258097	-0.1153	-0.184932		19.448	147.09	4	3	2	2	2	2	7141500	7480000	21498000	3659100	4.6	>sp|O14647|CHD2_HUMAN Chromodomain-helicase-DNA-binding protein 2 OS=Homo sapiens GN=CHD2 PE=1 SV=2
Q6IAA8	LAMTOR1	Ragulator complex protein LAMTOR1	-0.186501	-0.183328	-0.184913		17.238	14.43	33	45	7	4	7	4	116150000	124350000	225480000	298660000	55.9	>sp|Q6IAA8|LTOR1_HUMAN Ragulator complex protein LAMTOR1 OS=Homo sapiens GN=LAMTOR1 PE=1 SV=2
P49914	MTHFS	5-formyltetrahydrofolate cyclo-ligase	-0.195852	-0.173511	-0.184638		12.264	19.096	14	17	5	4	5	4	15272000	14277000	28488000	32395000	40.9	>sp|P49914|MTHFS_HUMAN 5-formyltetrahydrofolate cyclo-ligase OS=Homo sapiens GN=MTHFS PE=1 SV=2
Q96DX4	RSPRY1	RING finger and SPRY domain-containing protein 1	-0.402613	0.00489903	-0.184516		13.253	14.951	15	13	3	2	3	2	2674400	2914400	59419000	70944000	15.3	>sp|Q96DX4|RSPRY_HUMAN RING finger and SPRY domain-containing protein 1 OS=Homo sapiens GN=RSPRY1 PE=2 SV=1
Q9H8T0	AKTIP	AKT-interacting protein	-0.285106	-0.0896338	-0.184062		14.954	19.168	2	6	2	3	2	3	388110	419900	6272200	6996000	18.2	>sp|Q9H8T0|AKTIP_HUMAN AKT-interacting protein OS=Homo sapiens GN=AKTIP PE=1 SV=1
P20337	RAB3B	Ras-related protein Rab-3B	-0.2444	-0.125122	-0.183529		40.588	12.263	15	27	4	5	4	5	28046000	25633000	126750000	150940000	40.2	>sp|P20337|RAB3B_HUMAN Ras-related protein Rab-3B OS=Homo sapiens GN=RAB3B PE=1 SV=2
Q9NX14	NDUFB11	NADH dehydrogenase [ubiquinone] 1 beta subcomplex subunit 11, mitochondrial	-0.270828	-0.100843	-0.183334		24.272	18.015	17	20	4	5	4	5	69838000	74041000	115840000	135410000	51	>sp|Q9NX14|NDUBB_HUMAN NADH dehydrogenase [ubiquinone] 1 beta subcomplex subunit 11, mitochondrial OS=Homo sapiens GN=NDUFB11 PE=1 SV=1
Q9Y3D3	MRPS16	28S ribosomal protein S16, mitochondrial	-0.175812	-0.190046	-0.182911		20.768	7.9261	21	14	2	2	2	2	46721000	46982000	119830000	154610000	19	>sp|Q9Y3D3|RT16_HUMAN 28S ribosomal protein S16, mitochondrial OS=Homo sapiens GN=MRPS16 PE=1 SV=1
Q96NT0	CCDC115	Coiled-coil domain-containing protein 115	-0.0732718	-0.301354	-0.18281		39.235	13.346	5	8	3	3	3	3	9402900	9937700	16748000	22554000	50.6	>sp|Q96NT0|CC115_HUMAN Coiled-coil domain-containing protein 115 OS=Homo sapiens GN=CCDC115 PE=1 SV=1
P56385	ATP5I	ATP synthase subunit e, mitochondrial	-0.315334	-0.0610158	-0.182578		20.372	21.56	21	40	4	3	4	3	215230000	226860000	862960000	1112900000	52.2	>sp|P56385|ATP5I_HUMAN ATP synthase subunit e, mitochondrial OS=Homo sapiens GN=ATP5I PE=1 SV=2
Q92610	ZNF592	Zinc finger protein 592	-0.156008	-0.209641	-0.182575		11.563	24.125	19	8	4	4	4	4	4180300	4207700	8141900	11574000	12.4	>sp|Q92610|ZN592_HUMAN Zinc finger protein 592 OS=Homo sapiens GN=ZNF592 PE=1 SV=2
Q9NV96	TMEM30A	Cell cycle control protein 50A	-0.171975	-0.192447	-0.182175		9.59	12.094	6	7	3	3	3	3	5906000	6588900	12047000	15319000	12.2	>sp|Q9NV96|CC50A_HUMAN Cell cycle control protein 50A OS=Homo sapiens GN=TMEM30A PE=1 SV=1
Q9NZ01	TECR	Very-long-chain enoyl-CoA reductase	-0.420401	0.022361	-0.182101		18.58	20.321	108	106	13	14	13	14	717510000	856890000	3743000000	4161100000	33.1	>sp|Q9NZ01|TECR_HUMAN Very-long-chain enoyl-CoA reductase OS=Homo sapiens GN=TECR PE=1 SV=1
Q99959	PKP2	Plakophilin-2	-0.309875	-0.064607	-0.182035		34.654	29.44	148	127	22	25	22	25	307820000	337120000	944410000	1070400000	45.4	>sp|Q99959|PKP2_HUMAN Plakophilin-2 OS=Homo sapiens GN=PKP2 PE=1 SV=2
Q9Y5B6	PAXBP1	PAX3- and PAX7-binding protein 1	-0.157691	-0.206518	-0.181898		19.071	17.288	31	30	14	15	14	15	32712000	31237000	59206000	73553000	26	>sp|Q9Y5B6|PAXB1_HUMAN PAX3- and PAX7-binding protein 1 OS=Homo sapiens GN=PAXBP1 PE=1 SV=2
O00159	MYO1C	Unconventional myosin-Ic	-0.178874	-0.184725	-0.181796		21.242	36.835	85	100	25	22	24	22	131120000	140890000	388830000	472130000	35.1	>sp|O00159|MYO1C_HUMAN Unconventional myosin-Ic OS=Homo sapiens GN=MYO1C PE=1 SV=4
Q06787	FMR1	Fragile X mental retardation protein 1	-0.372618	-0.0127833	-0.181511		20.538	22.394	27	35	9	11	9	11	21606000	26984000	98106000	110480000	32.3	>sp|Q06787|FMR1_HUMAN Fragile X mental retardation protein 1 OS=Homo sapiens GN=FMR1 PE=1 SV=1
O00468	AGRN	Agrin	-0.166458	-0.196355	-0.181329		22.037	34.38	14	14	8	8	8	8	8864900	8572000	14326000	18950000	11	>sp|O00468|AGRIN_HUMAN Agrin OS=Homo sapiens GN=AGRN PE=1 SV=5
P62820	RAB1A	Ras-related protein Rab-1A	-0.219587	-0.14274	-0.180652		24.723	14.023	52	77	4	6	4	6	277240000	273520000	1411000000	1766200000	75.6	>sp|P62820|RAB1A_HUMAN Ras-related protein Rab-1A OS=Homo sapiens GN=RAB1A PE=1 SV=3
Q12996	CSTF3	Cleavage stimulation factor subunit 3	-0.136848	-0.225645	-0.180563		30.144	16.532	57	81	16	20	16	20	90743000	87916000	298290000	401250000	34.4	>sp|Q12996|CSTF3_HUMAN Cleavage stimulation factor subunit 3 OS=Homo sapiens GN=CSTF3 PE=1 SV=1
P07602	PSAP	Proactivator polypeptide	-0.182184	-0.178619	-0.1804		17.381	23.645	256	262	26	23	26	23	1641600000	1604800000	6295600000	7977300000	61.1	>sp|P07602|SAP_HUMAN Proactivator polypeptide OS=Homo sapiens GN=PSAP PE=1 SV=2
Q8NFV4	ABHD11	Alpha/beta hydrolase domain-containing protein 11	-0.226262	-0.135929	-0.180388		18.743	12.759	13	6	5	4	5	4	14778000	15250000	26747000	36895000	28.9	>sp|Q8NFV4|ABHDB_HUMAN Alpha/beta hydrolase domain-containing protein 11 OS=Homo sapiens GN=ABHD11 PE=2 SV=1
Q9HCG7	GBA2	Non-lysosomal glucosylceramidase	-0.31487	-0.0568609	-0.180106		22.802	13.788	16	23	9	9	9	9	14351000	16513000	39329000	45547000	19.2	>sp|Q9HCG7|GBA2_HUMAN Non-lysosomal glucosylceramidase OS=Homo sapiens GN=GBA2 PE=1 SV=2
O75976	CPD	Carboxypeptidase D	-0.203013	-0.156785	-0.179714		23.995	30.313	119	110	33	32	33	32	172820000	190400000	392870000	469210000	39.2	>sp|O75976|CBPD_HUMAN Carboxypeptidase D OS=Homo sapiens GN=CPD PE=1 SV=2
P53701	HCCS	Cytochrome c-type heme lyase	-0.218719	-0.141302	-0.179491		16.964	23.765	56	59	11	12	11	12	217820000	194930000	304110000	406690000	62.3	>sp|P53701|CCHL_HUMAN Cytochrome c-type heme lyase OS=Homo sapiens GN=HCCS PE=1 SV=1
Q8NDX5	PHC3	Polyhomeotic-like protein 3	-0.137372	-0.222805	-0.179456		12.024	13.085	5	7	3	5	3	5	3280000	3213600	8930900	9849500	12	>sp|Q8NDX5|PHC3_HUMAN Polyhomeotic-like protein 3 OS=Homo sapiens GN=PHC3 PE=1 SV=1
Q71DI3	HIST2H3A	Histone H3.2	-0.167872	-0.191057	-0.179418		29.354	20.409	69	63	7	7	1	1	3169500000	3254500000	10711000000	14329000000	53.7	>sp|Q71DI3|H32_HUMAN Histone H3.2 OS=Homo sapiens GN=HIST2H3A PE=1 SV=3;>sp|Q16695|H31T_HUMAN Histone H3.1t OS=Homo sapiens GN=HIST3H3 PE=1 SV=3;>sp|Q6NXT2|H3C_HUMAN Histone H3.3C OS=Homo sapiens GN=H3F3C PE=1 SV=3
P46781	RPS9	40S ribosomal protein S9	-0.467905	0.0609088	-0.179403		20.812	16.025	90	111	12	12	12	12	553130000	679510000	3717500000	4095600000	44.3	>sp|P46781|RS9_HUMAN 40S ribosomal protein S9 OS=Homo sapiens GN=RPS9 PE=1 SV=3
P45877	PPIC	Peptidyl-prolyl cis-trans isomerase C	-0.224411	-0.135272	-0.179153		31.088	9.5541	5	6	3	2	3	2	2249700	2349700	20215000	23634000	26.9	>sp|P45877|PPIC_HUMAN Peptidyl-prolyl cis-trans isomerase C OS=Homo sapiens GN=PPIC PE=1 SV=1
Q9Y3B2	EXOSC1	Exosome complex component CSL4	0.0717699	-0.482539	-0.178925		11.449	17.326	6	10	2	3	2	3	13340000	11570000	30493000	40486000	20	>sp|Q9Y3B2|EXOS1_HUMAN Exosome complex component CSL4 OS=Homo sapiens GN=EXOSC1 PE=1 SV=1
Q6IN84	MRM1	rRNA methyltransferase 1, mitochondrial	-0.216113	-0.142609	-0.178893		31.588	21.272	11	7	5	2	5	2	6870700	7246900	32624000	38918000	27.5	>sp|Q6IN84|MRM1_HUMAN rRNA methyltransferase 1, mitochondrial OS=Homo sapiens GN=MRM1 PE=1 SV=1
P10412	HIST1H1E	Histone H1.4	-0.0728604	-0.292664	-0.17858		43.689	20.883	24	29	2	2	2	2	963970000	820470000	1032200000	1345500000	37.4	>sp|P10412|H14_HUMAN Histone H1.4 OS=Homo sapiens GN=HIST1H1E PE=1 SV=2
Q68CK6	ACSM2B	Acyl-coenzyme A synthetase ACSM2B, mitochondrial	-0.103128	-0.257011	-0.178019		40.883	50.898	9	12	4	6	2	2	7902100	6573600	19653000	23260000	19.1	>sp|Q68CK6|ACS2B_HUMAN Acyl-coenzyme A synthetase ACSM2B, mitochondrial OS=Homo sapiens GN=ACSM2B PE=1 SV=2
P16403	HIST1H1C	Histone H1.2	-0.088413	-0.272023	-0.177299		17.791	26.573	115	97	9	8	2	3	5022000000	4380700000	9618100000	13201000000	48.4	>sp|P16403|H12_HUMAN Histone H1.2 OS=Homo sapiens GN=HIST1H1C PE=1 SV=2
Q96JB3	HIC2	Hypermethylated in cancer 2 protein	-0.0866479	-0.272859	-0.176751		13.02	49.459	19	16	6	7	6	7	17833000	18471000	47132000	56840000	18.9	>sp|Q96JB3|HIC2_HUMAN Hypermethylated in cancer 2 protein OS=Homo sapiens GN=HIC2 PE=1 SV=2
Q01814	ATP2B2	Plasma membrane calcium-transporting ATPase 2	-0.107018	-0.249749	-0.176619		19.287	16.002	65	75	16	18	16	18	72288000	67650000	193870000	247670000	32.2	>sp|Q01814|AT2B2_HUMAN Plasma membrane calcium-transporting ATPase 2 OS=Homo sapiens GN=ATP2B2 PE=1 SV=2
Q9BSE4	HERPUD2	Homocysteine-responsive endoplasmic reticulum-resident ubiquitin-like domain member 2 protein	-0.0723115	-0.288299	-0.176267		9.1027	21.434	4	2	3	2	3	2	2328000	1993900	1796800	2128100	19.7	>sp|Q9BSE4|HERP2_HUMAN Homocysteine-responsive endoplasmic reticulum-resident ubiquitin-like domain member 2 protein OS=Homo sapiens GN=HERPUD2 PE=1 SV=2
Q70UQ0	IKBIP	Inhibitor of nuclear factor kappa-B kinase-interacting protein	-0.0746424	-0.28558	-0.176259		16.794	29.408	65	62	16	15	16	15	175210000	160230000	347610000	454530000	46.9	>sp|Q70UQ0|IKIP_HUMAN Inhibitor of nuclear factor kappa-B kinase-interacting protein OS=Homo sapiens GN=IKBIP PE=1 SV=1
O75695	RP2	Protein XRP2	-0.158725	-0.193709	-0.176111		33.079	21.783	45	24	10	7	10	7	787320000	640030000	84616000	101000000	36.6	>sp|O75695|XRP2_HUMAN Protein XRP2 OS=Homo sapiens GN=RP2 PE=1 SV=4
Q6PL18	ATAD2	ATPase family AAA domain-containing protein 2	-0.185486	-0.166458	-0.175941		26.816	20.964	11	15	6	8	5	7	5251200	5637000	19915000	23260000	13	>sp|Q6PL18|ATAD2_HUMAN ATPase family AAA domain-containing protein 2 OS=Homo sapiens GN=ATAD2 PE=1 SV=1
P15880	RPS2	40S ribosomal protein S2	-0.4609	0.0631077	-0.175235		24.627	20.46	151	167	14	13	14	13	1092900000	1293200000	5632100000	6068000000	48.8	>sp|P15880|RS2_HUMAN 40S ribosomal protein S2 OS=Homo sapiens GN=RPS2 PE=1 SV=2
P18433	PTPRA	Receptor-type tyrosine-protein phosphatase alpha	-0.298776	-0.0612924	-0.175153		37.447	34.99	6	6	5	3	5	3	9032800	4515300	8441100	10511000	9.4	>sp|P18433|PTPRA_HUMAN Receptor-type tyrosine-protein phosphatase alpha OS=Homo sapiens GN=PTPRA PE=1 SV=2
P54709	ATP1B3	Sodium/potassium-transporting ATPase subunit beta-3	-0.219587	-0.131853	-0.175053		23.706	16.176	123	90	13	11	13	11	910110000	905740000	1972400000	2443200000	57.7	>sp|P54709|AT1B3_HUMAN Sodium/potassium-transporting ATPase subunit beta-3 OS=Homo sapiens GN=ATP1B3 PE=1 SV=1
Q08426	EHHADH	Peroxisomal bifunctional enzyme	-0.386259	0.00935009	-0.174937		20.043	28.634	37	63	17	22	17	22	53214000	68778000	244350000	266900000	47.9	>sp|Q08426|ECHP_HUMAN Peroxisomal bifunctional enzyme OS=Homo sapiens GN=EHHADH PE=1 SV=3
Q9Y2U8	LEMD3	Inner nuclear membrane protein Man1	-0.222928	-0.128293	-0.174835		22.163	16.573	76	80	24	22	24	22	105770000	103960000	194160000	237910000	43.1	>sp|Q9Y2U8|MAN1_HUMAN Inner nuclear membrane protein Man1 OS=Homo sapiens GN=LEMD3 PE=1 SV=2
Q9NQT4	EXOSC5	Exosome complex component RRP46	0.0152137	-0.393087	-0.17454		14.064	12.39	25	15	7	5	7	5	70452000	41182000	54797000	94639000	54.5	>sp|Q9NQT4|EXOS5_HUMAN Exosome complex component RRP46 OS=Homo sapiens GN=EXOSC5 PE=1 SV=1
O15439	ABCC4	Multidrug resistance-associated protein 4	-0.14978	-0.198745	-0.174055		19.969	15.194	10	12	6	7	6	7	6285400	5124500	23979000	33331000	10	>sp|O15439|MRP4_HUMAN Multidrug resistance-associated protein 4 OS=Homo sapiens GN=ABCC4 PE=1 SV=3
Q96AJ9	VTI1A	Vesicle transport through interaction with t-SNAREs homolog 1A	-0.252779	-0.0992279	-0.173961		19.761	20.477	10	5	3	4	3	4	6072200	6864400	9761300	11023000	27.2	>sp|Q96AJ9|VTI1A_HUMAN Vesicle transport through interaction with t-SNAREs homolog 1A OS=Homo sapiens GN=VTI1A PE=1 SV=2
Q86XI2	NCAPG2	Condensin-2 complex subunit G2	-0.0546401	-0.304044	-0.173959		59.364	12.62	12	8	4	4	4	4	4451200	3582000	10327000	12389000	6.7	>sp|Q86XI2|CNDG2_HUMAN Condensin-2 complex subunit G2 OS=Homo sapiens GN=NCAPG2 PE=1 SV=1
O60306	AQR	Intron-binding protein aquarius	-0.111565	-0.238787	-0.173774		42.572	18.919	98	71	31	22	30	21	81117000	79893000	182220000	237450000	34.8	>sp|O60306|AQR_HUMAN Intron-binding protein aquarius OS=Homo sapiens GN=AQR PE=1 SV=4
Q9Y2R0	COA3	Cytochrome c oxidase assembly protein 3 homolog, mitochondrial	-0.23842	-0.111833	-0.173738		23.084	31.796	21	13	4	3	4	3	131580000	145050000	287540000	354030000	29.2	>sp|Q9Y2R0|COA3_HUMAN Cytochrome c oxidase assembly protein 3 homolog, mitochondrial OS=Homo sapiens GN=COA3 PE=1 SV=1
P11279	LAMP1	Lysosome-associated membrane glycoprotein 1	-0.127897	-0.221073	-0.173733		11.223	16.075	64	34	8	7	8	7	479180000	486780000	1013300000	1447400000	20.6	>sp|P11279|LAMP1_HUMAN Lysosome-associated membrane glycoprotein 1 OS=Homo sapiens GN=LAMP1 PE=1 SV=3
Q9Y666	SLC12A7	Solute carrier family 12 member 7	-0.277866	-0.0762853	-0.173558		24.637	36.906	16	18	7	7	6	6	11076000	13162000	18667000	21622000	15.8	>sp|Q9Y666|S12A7_HUMAN Solute carrier family 12 member 7 OS=Homo sapiens GN=SLC12A7 PE=1 SV=3
P84098	RPL19	60S ribosomal protein L19	-0.338567	-0.025454	-0.173533		17.576	19.256	66	73	9	8	9	8	770340000	794800000	2539600000	2853400000	36.2	>sp|P84098|RL19_HUMAN 60S ribosomal protein L19 OS=Homo sapiens GN=RPL19 PE=1 SV=1
P02786	TFRC	Transferrin receptor protein 1	-0.306262	-0.0506062	-0.172779		28.004	19.147	154	183	27	27	27	27	634000000	694080000	2620500000	3171100000	48.7	>sp|P02786|TFR1_HUMAN Transferrin receptor protein 1 OS=Homo sapiens GN=TFRC PE=1 SV=2
Q7Z4W1	DCXR	L-xylulose reductase	-0.226632	-0.120485	-0.172582		34.815	25.208	53	88	9	12	9	12	83249000	88521000	409780000	474050000	59.4	>sp|Q7Z4W1|DCXR_HUMAN L-xylulose reductase OS=Homo sapiens GN=DCXR PE=1 SV=2
Q9P2I0	CPSF2	Cleavage and polyadenylation specificity factor subunit 2	-0.169284	-0.175812	-0.172544		21.948	20.269	120	90	26	28	26	28	194740000	193550000	438940000	478350000	60.1	>sp|Q9P2I0|CPSF2_HUMAN Cleavage and polyadenylation specificity factor subunit 2 OS=Homo sapiens GN=CPSF2 PE=1 SV=2
P26572	MGAT1	Alpha-1,3-mannosyl-glycoprotein 2-beta-N-acetylglucosaminyltransferase	-0.452174	0.0617067	-0.172473		23.282	16.059	19	29	9	10	9	10	25989000	27764000	191890000	163510000	40	>sp|P26572|MGAT1_HUMAN Alpha-1,3-mannosyl-glycoprotein 2-beta-N-acetylglucosaminyltransferase OS=Homo sapiens GN=MGAT1 PE=2 SV=2
Q9H3K2	GHITM	Growth hormone-inducible transmembrane protein	-0.558659	0.131914	-0.172442		26.579	21.87	14	13	2	2	2	2	10918000	13236000	40381000	40875000	9	>sp|Q9H3K2|GHITM_HUMAN Growth hormone-inducible transmembrane protein OS=Homo sapiens GN=GHITM PE=1 SV=2
P07355	ANXA2	Annexin A2	-0.289126	-0.0644689	-0.172429		35.208	22.223	592	544	35	30	35	30	17760000000	17440000000	35869000000	42053000000	82	>sp|P07355|ANXA2_HUMAN Annexin A2 OS=Homo sapiens GN=ANXA2 PE=1 SV=2;>sp|A6NMY6|AXA2L_HUMAN Putative annexin A2-like protein OS=Homo sapiens GN=ANXA2P2 PE=5 SV=2
Q96EY1	DNAJA3	DnaJ homolog subfamily A member 3, mitochondrial	-0.169797	-0.174023	-0.171908		13.388	17.301	87	59	16	13	16	13	258070000	208080000	370190000	467840000	41.7	>sp|Q96EY1|DNJA3_HUMAN DnaJ homolog subfamily A member 3, mitochondrial OS=Homo sapiens GN=DNAJA3 PE=1 SV=2
Q9NQ29	LUC7L	Putative RNA-binding protein Luc7-like 1	0.0726194	-0.465922	-0.171667		22.3	36.176	16	7	4	3	4	3	67790000	56764000	51237000	67968000	26.4	>sp|Q9NQ29|LUC7L_HUMAN Putative RNA-binding protein Luc7-like 1 OS=Homo sapiens GN=LUC7L PE=1 SV=1
Q9Y6K1	DNMT3A	DNA (cytosine-5)-methyltransferase 3A	-0.129349	-0.215244	-0.171657		20.689	22.28	21	22	7	12	7	12	27700000	27238000	57141000	67266000	20.4	>sp|Q9Y6K1|DNM3A_HUMAN DNA (cytosine-5)-methyltransferase 3A OS=Homo sapiens GN=DNMT3A PE=1 SV=4
A0JNW5	UHRF1BP1L	UHRF1-binding protein 1-like	-0.389457	0.0181474	-0.171307		6.0732	21.685	2	12	2	9	2	9	731900	515680	24962000	24601000	10.5	>sp|A0JNW5|UH1BL_HUMAN UHRF1-binding protein 1-like OS=Homo sapiens GN=UHRF1BP1L PE=1 SV=2
O43752	STX6	Syntaxin-6	0.0257497	-0.398679	-0.170913		20.199	13.457	6	4	2	4	2	4	1398300	1271900	4280600	5446600	23.1	>sp|O43752|STX6_HUMAN Syntaxin-6 OS=Homo sapiens GN=STX6 PE=1 SV=1
Q15029	EFTUD2	116 kDa U5 small nuclear ribonucleoprotein component	-0.181166	-0.160146	-0.170618		20.206	30.875	347	303	39	39	39	39	1066800000	1062700000	2470900000	3060700000	67.1	>sp|Q15029|U5S1_HUMAN 116 kDa U5 small nuclear ribonucleoprotein component OS=Homo sapiens GN=EFTUD2 PE=1 SV=1
O75394	MRPL33	39S ribosomal protein L33, mitochondrial	-0.214995	-0.127105	-0.170381		20.359	28.285	5	8	2	2	2	2	7803200	6224700	67413000	78698000	38.5	>sp|O75394|RM33_HUMAN 39S ribosomal protein L33, mitochondrial OS=Homo sapiens GN=MRPL33 PE=1 SV=1
Q9HBH1	PDF	Peptide deformylase, mitochondrial	-0.275007	-0.0727233	-0.170323		25.321	26.406	32	20	9	6	9	6	37822000	39068000	49291000	69085000	51	>sp|Q9HBH1|DEFM_HUMAN Peptide deformylase, mitochondrial OS=Homo sapiens GN=PDF PE=1 SV=1
P54198	HIRA	Protein HIRA	-0.311038	-0.0415233	-0.169996		27.982	41.083	12	19	4	9	4	9	29778000	29753000	66042000	64884000	14.8	>sp|P54198|HIRA_HUMAN Protein HIRA OS=Homo sapiens GN=HIRA PE=1 SV=2
Q53FV1	ORMDL2	ORM1-like protein 2	-0.486766	0.0897893	-0.169876		14.718	2.1644	9	3	3	3	2	1	23889000	29584000	65205000	69766000	33.3	>sp|Q53FV1|ORML2_HUMAN ORM1-like protein 2 OS=Homo sapiens GN=ORMDL2 PE=2 SV=2
Q9Y221	NIP7	60S ribosome subunit biogenesis protein NIP7 homolog	-0.0264459	-0.328951	-0.169784		22.979	44.697	58	35	11	9	11	9	166510000	137140000	342650000	449340000	76.1	>sp|Q9Y221|NIP7_HUMAN 60S ribosome subunit biogenesis protein NIP7 homolog OS=Homo sapiens GN=NIP7 PE=1 SV=1
Q9UJ14	GGT7	Gamma-glutamyltransferase 7	-0.15782	-0.181548	-0.169635		16.865	49.819	8	11	4	6	4	6	5317400	5683300	13076000	15107000	15.1	>sp|Q9UJ14|GGT7_HUMAN Gamma-glutamyltransferase 7 OS=Homo sapiens GN=GGT7 PE=1 SV=2
P62805	HIST1H4A	Histone H4	-0.0585243	-0.289244	-0.169277		30.325	15.721	321	429	12	13	12	13	33104000000	27882000000	80930000000	106500000000	65	>sp|P62805|H4_HUMAN Histone H4 OS=Homo sapiens GN=HIST1H4A PE=1 SV=2
O75970	MPDZ	Multiple PDZ domain protein	-0.812704	0.274285	-0.16917		32.537	31.177	3	9	2	5	2	5	930030	1307700	10744000	11352000	6	>sp|O75970|MPDZ_HUMAN Multiple PDZ domain protein OS=Homo sapiens GN=MPDZ PE=1 SV=2
P86791	CCZ1	Vacuolar fusion protein CCZ1 homolog	-0.126577	-0.212632	-0.168962		18.12	20.181	10	6	5	6	5	6	4041100	4089600	11432000	8644200	22	>sp|P86791|CCZ1_HUMAN Vacuolar fusion protein CCZ1 homolog OS=Homo sapiens GN=CCZ1 PE=1 SV=1;>sp|P86790|CCZ1B_HUMAN Vacuolar fusion protein CCZ1 homolog B OS=Homo sapiens GN=CCZ1B PE=1 SV=1
P61604	HSPE1	10 kDa heat shock protein, mitochondrial	-0.178874	-0.158596	-0.168699		29.282	30.737	257	193	9	9	9	9	10532000000	10012000000	19830000000	24266000000	68.6	>sp|P61604|CH10_HUMAN 10 kDa heat shock protein, mitochondrial OS=Homo sapiens GN=HSPE1 PE=1 SV=2
P43251	BTD	Biotinidase	-0.355242	-0.00331438	-0.168573		20.307	13.598	5	13	2	4	2	4	1795600	1959100	14356000	16656000	11	>sp|P43251|BTD_HUMAN Biotinidase OS=Homo sapiens GN=BTD PE=1 SV=2
P09543	CNP	2,3-cyclic-nucleotide 3-phosphodiesterase	-0.240131	-0.100036	-0.168383		23.415	13.123	81	104	19	21	19	21	185570000	182910000	733160000	858130000	50.6	>sp|P09543|CN37_HUMAN 2,3-cyclic-nucleotide 3-phosphodiesterase OS=Homo sapiens GN=CNP PE=1 SV=2
Q99848	EBNA1BP2	Probable rRNA-processing protein EBP2	-0.197991	-0.139208	-0.1683		20.881	25.016	67	73	12	12	12	12	424450000	396510000	710100000	887590000	48.4	>sp|Q99848|EBP2_HUMAN Probable rRNA-processing protein EBP2 OS=Homo sapiens GN=EBNA1BP2 PE=1 SV=2
Q10570	CPSF1	Cleavage and polyadenylation specificity factor subunit 1	-0.150949	-0.185359	-0.168052		18.144	16.826	159	132	37	30	37	30	230370000	213910000	573650000	737670000	42.8	>sp|Q10570|CPSF1_HUMAN Cleavage and polyadenylation specificity factor subunit 1 OS=Homo sapiens GN=CPSF1 PE=1 SV=2
P45954	ACADSB	Short/branched chain specific acyl-CoA dehydrogenase, mitochondrial	-0.299245	-0.0476779	-0.167985		15.215	19.58	149	151	18	18	18	18	738700000	773200000	2758600000	3252800000	59.7	>sp|P45954|ACDSB_HUMAN Short/branched chain specific acyl-CoA dehydrogenase, mitochondrial OS=Homo sapiens GN=ACADSB PE=1 SV=1
O00469	PLOD2	Procollagen-lysine,2-oxoglutarate 5-dioxygenase 2	-0.148218	-0.187641	-0.167795		33.006	44.632	53	71	18	18	18	18	95122000	86153000	269540000	323880000	36.8	>sp|O00469|PLOD2_HUMAN Procollagen-lysine,2-oxoglutarate 5-dioxygenase 2 OS=Homo sapiens GN=PLOD2 PE=1 SV=2
Q8WVV9	HNRNPLL	Heterogeneous nuclear ribonucleoprotein L-like	-0.1333	-0.202763	-0.167613		19.371	15.139	61	37	17	14	17	14	91612000	156130000	93651000	127920000	59.8	>sp|Q8WVV9|HNRLL_HUMAN Heterogeneous nuclear ribonucleoprotein L-like OS=Homo sapiens GN=HNRNPLL PE=1 SV=1
Q9BXS9	SLC26A6	Solute carrier family 26 member 6	-0.3122	-0.0352017	-0.167063		6.3032	18.62	12	11	4	5	4	5	13966000	15189000	49640000	56728000	15.2	>sp|Q9BXS9|S26A6_HUMAN Solute carrier family 26 member 6 OS=Homo sapiens GN=SLC26A6 PE=1 SV=1
P46100	ATRX	Transcriptional regulator ATRX	-0.350837	-0.00374608	-0.166878		27.854	24.18	19	15	9	8	9	8	16158000	15610000	22403000	25023000	7.6	>sp|P46100|ATRX_HUMAN Transcriptional regulator ATRX OS=Homo sapiens GN=ATRX PE=1 SV=5
P61764	STXBP1	Syntaxin-binding protein 1	-0.348912	-0.00518435	-0.166836		26.028	21.202	37	23	12	11	12	11	30710000	34558000	61891000	67192000	38.4	>sp|P61764|STXB1_HUMAN Syntaxin-binding protein 1 OS=Homo sapiens GN=STXBP1 PE=1 SV=1
Q13277	STX3	Syntaxin-3	-0.204266	-0.129745	-0.166524		40.46	15.173	39	48	7	7	7	7	72800000	71345000	280260000	337350000	28.7	>sp|Q13277|STX3_HUMAN Syntaxin-3 OS=Homo sapiens GN=STX3 PE=1 SV=3
Q8N387	MUC15	Mucin-15	0.0465931	-0.416624	-0.166503		21.613	23.021	7	6	2	2	2	2	5138600	4718100	9991700	15299000	17.4	>sp|Q8N387|MUC15_HUMAN Mucin-15 OS=Homo sapiens GN=MUC15 PE=2 SV=2
P40429	RPL13A	60S ribosomal protein L13a	-0.373286	0.0147765	-0.166246		38.541	10.836	49	51	8	8	8	8	204590000	212660000	1111500000	1250800000	35	>sp|P40429|RL13A_HUMAN 60S ribosomal protein L13a OS=Homo sapiens GN=RPL13A PE=1 SV=2;>sp|Q6NVV1|R13AX_HUMAN Putative 60S ribosomal protein L13a-like MGC87657 OS=Homo sapiens PE=5 SV=1
P57105	SYNJ2BP	Synaptojanin-2-binding protein	-0.312897	-0.0328061	-0.166065		36.768	26.22	25	17	6	3	6	3	55999000	60432000	105500000	138930000	62.1	>sp|P57105|SYJ2B_HUMAN Synaptojanin-2-binding protein OS=Homo sapiens GN=SYNJ2BP PE=1 SV=2
Q8TB37	NUBPL	Iron-sulfur protein NUBPL	-0.191057	-0.14104	-0.165832		52.872	64.401	43	40	9	9	9	9	54364000	57291000	246870000	305900000	40.4	>sp|Q8TB37|NUBPL_HUMAN Iron-sulfur protein NUBPL OS=Homo sapiens GN=NUBPL PE=1 SV=3
O75387	SLC43A1	Large neutral amino acids transporter small subunit 3	-0.187134	-0.144568	-0.165694		20.808	16.977	30	30	8	7	8	7	57029000	58835000	332820000	161690000	20.2	>sp|O75387|LAT3_HUMAN Large neutral amino acids transporter small subunit 3 OS=Homo sapiens GN=SLC43A1 PE=2 SV=1
Q9NUQ6	SPATS2L	SPATS2-like protein	-0.417812	0.0490538	-0.165576		23.72	18.418	70	53	19	14	19	14	123180000	139250000	251800000	276690000	45.7	>sp|Q9NUQ6|SPS2L_HUMAN SPATS2-like protein OS=Homo sapiens GN=SPATS2L PE=1 SV=2
O15484	CAPN5	Calpain-5	-0.182692	-0.147958	-0.16522		24.162	17.809	6	6	2	5	2	5	5829400	6091200	12334000	16888000	10.9	>sp|O15484|CAN5_HUMAN Calpain-5 OS=Homo sapiens GN=CAPN5 PE=1 SV=2
O76094	SRP72	Signal recognition particle subunit SRP72	-0.320889	-0.0243196	-0.164997		18.429	20.4	70	105	19	22	19	22	153330000	155400000	511890000	555490000	46.2	>sp|O76094|SRP72_HUMAN Signal recognition particle subunit SRP72 OS=Homo sapiens GN=SRP72 PE=1 SV=3
O00461	GOLIM4	Golgi integral membrane protein 4	-0.143132	-0.186881	-0.164841		30.212	23.679	25	34	10	10	10	10	27161000	24649000	93981000	109360000	22	>sp|O00461|GOLI4_HUMAN Golgi integral membrane protein 4 OS=Homo sapiens GN=GOLIM4 PE=1 SV=1
O95302	FKBP9	Peptidyl-prolyl cis-trans isomerase FKBP9	-0.120485	-0.209765	-0.164435		27.777	15.882	53	54	12	13	11	13	90595000	82768000	242160000	298420000	26.3	>sp|O95302|FKBP9_HUMAN Peptidyl-prolyl cis-trans isomerase FKBP9 OS=Homo sapiens GN=FKBP9 PE=1 SV=2
P20338	RAB4A	Ras-related protein Rab-4A	-0.138421	-0.190804	-0.164375		22.953	16.348	26	32	8	9	7	8	52864000	52879000	252420000	319320000	49.5	>sp|P20338|RAB4A_HUMAN Ras-related protein Rab-4A OS=Homo sapiens GN=RAB4A PE=1 SV=3
P29590	PML	Protein PML	-0.0558898	-0.281194	-0.164148		21.043	22.678	40	23	15	10	15	10	48894000	43235000	58163000	72745000	25.3	>sp|P29590|PML_HUMAN Protein PML OS=Homo sapiens GN=PML PE=1 SV=3
P00403	MT-CO2	Cytochrome c oxidase subunit 2	-0.339935	-0.0070519	-0.163914		23.266	14.297	56	43	7	5	7	5	625760000	651410000	1207000000	1391300000	41	>sp|P00403|COX2_HUMAN Cytochrome c oxidase subunit 2 OS=Homo sapiens GN=MT-CO2 PE=1 SV=1
Q92823	NRCAM	Neuronal cell adhesion molecule	-0.298306	-0.0402613	-0.163522		13.963	21.579	21	12	9	6	9	6	14547000	14922000	36134000	39880000	16.1	>sp|Q92823|NRCAM_HUMAN Neuronal cell adhesion molecule OS=Homo sapiens GN=NRCAM PE=1 SV=3
Q9GZY4	COA1	Cytochrome c oxidase assembly protein 1 homolog	0.00387163	-0.351855	-0.163055		10.779	25.201	3	5	2	3	2	3	4901300	3795800	18406000	22466000	31.5	>sp|Q9GZY4|COA1_HUMAN Cytochrome c oxidase assembly protein 1 homolog OS=Homo sapiens GN=COA1 PE=1 SV=1
Q9Y375	NDUFAF1	Complex I intermediate-associated protein 30, mitochondrial	-0.336855	-0.00776948	-0.162949		17.414	37.224	28	13	11	5	11	5	21247000	22119000	37848000	37199000	47.7	>sp|Q9Y375|CIA30_HUMAN Complex I intermediate-associated protein 30, mitochondrial OS=Homo sapiens GN=NDUFAF1 PE=1 SV=2
Q13610	PWP1	Periodic tryptophan protein 1 homolog	-0.0662615	-0.266157	-0.16275		24.995	14.713	55	16	11	8	11	8	112490000	104410000	101100000	130680000	40.7	>sp|Q13610|PWP1_HUMAN Periodic tryptophan protein 1 homolog OS=Homo sapiens GN=PWP1 PE=1 SV=1
P23434	GCSH	Glycine cleavage system H protein, mitochondrial	-0.170566	-0.154324	-0.162422		9.3915	19.264	46	70	4	4	4	4	193600000	188000000	721720000	893090000	43.9	>sp|P23434|GCSH_HUMAN Glycine cleavage system H protein, mitochondrial OS=Homo sapiens GN=GCSH PE=1 SV=2
Q9UIJ7	AK3	GTP:AMP phosphotransferase AK3, mitochondrial	-0.124593	-0.201007	-0.162294		17.989	17.052	96	100	15	12	15	12	397400000	369920000	1098100000	1355300000	66.5	>sp|Q9UIJ7|KAD3_HUMAN GTP:AMP phosphotransferase AK3, mitochondrial OS=Homo sapiens GN=AK3 PE=1 SV=4
Q13636	RAB31	Ras-related protein Rab-31	-0.168514	-0.155749	-0.162117		15.374	22.12	37	25	6	6	6	6	65272000	64260000	138580000	156150000	53.1	>sp|Q13636|RAB31_HUMAN Ras-related protein Rab-31 OS=Homo sapiens GN=RAB31 PE=1 SV=1
O15320	CTAGE5	cTAGE family member 5	-0.155361	-0.168899	-0.162114		12.864	20.807	62	71	15	25	11	16	138710000	124210000	262420000	312170000	39.7	>sp|O15320|CTGE5_HUMAN cTAGE family member 5 OS=Homo sapiens GN=CTAGE5 PE=1 SV=4
Q96Q45	TMEM237	Transmembrane protein 237	-0.0727233	-0.257373	-0.162096		22.833	31.254	3	10	2	5	2	5	6026300	7240200	32009000	47450000	13.7	>sp|Q96Q45|TM237_HUMAN Transmembrane protein 237 OS=Homo sapiens GN=TMEM237 PE=1 SV=2
Q9Y6N1	COX11	Cytochrome c oxidase assembly protein COX11, mitochondrial	-0.343124	-0.000865332	-0.161869		22.199	18.571	42	20	7	4	7	4	40178000	45354000	33902000	40049000	41.7	>sp|Q9Y6N1|COX11_HUMAN Cytochrome c oxidase assembly protein COX11, mitochondrial OS=Homo sapiens GN=COX11 PE=1 SV=3
O60282	KIF5C	Kinesin heavy chain isoform 5C	-0.190046	-0.133827	-0.161662		59.899	11.637	3	19	2	3	2	3	10230000	5113700	98943000	129400000	15.3	>sp|O60282|KIF5C_HUMAN Kinesin heavy chain isoform 5C OS=Homo sapiens GN=KIF5C PE=1 SV=1
P18074	ERCC2	TFIIH basal transcription factor complex helicase XPD subunit	-0.221815	-0.1038	-0.161601		19.646	21.761	7	18	3	5	3	5	6980400	6216600	46004000	50296000	12.6	>sp|P18074|ERCC2_HUMAN TFIIH basal transcription factor complex helicase XPD subunit OS=Homo sapiens GN=ERCC2 PE=1 SV=1
P07947	YES1	Tyrosine-protein kinase Yes	-0.0908535	-0.235972	-0.161589		19.518	36.347	106	74	20	17	14	11	151950000	142830000	330100000	415290000	57.5	>sp|P07947|YES_HUMAN Tyrosine-protein kinase Yes OS=Homo sapiens GN=YES1 PE=1 SV=3
Q8NEW0	SLC30A7	Zinc transporter 7	-0.559051	0.149985	-0.161406		11.692	32.797	15	13	3	6	3	6	30838000	40990000	227790000	125220000	18.9	>sp|Q8NEW0|ZNT7_HUMAN Zinc transporter 7 OS=Homo sapiens GN=SLC30A7 PE=1 SV=1
Q8IWS0	PHF6	PHD finger protein 6	-0.142871	-0.179511	-0.161075		19.298	22.326	38	33	7	8	7	8	52848000	50547000	84678000	108140000	40.8	>sp|Q8IWS0|PHF6_HUMAN PHD finger protein 6 OS=Homo sapiens GN=PHF6 PE=1 SV=1
Q9NUY8	TBC1D23	TBC1 domain family member 23	-0.374066	0.0247073	-0.160945		10.527	18.998	5	6	2	2	2	2	7844600	7547700	25233000	27634000	5.4	>sp|Q9NUY8|TBC23_HUMAN TBC1 domain family member 23 OS=Homo sapiens GN=TBC1D23 PE=1 SV=3
Q15746	MYLK	Myosin light chain kinase, smooth muscle	-0.698041	0.229738	-0.160822		39.979	29.811	3	7	3	2	3	2	2464600	3024900	10588000	11312000	4	>sp|Q15746|MYLK_HUMAN Myosin light chain kinase, smooth muscle OS=Homo sapiens GN=MYLK PE=1 SV=4
Q09161	NCBP1	Nuclear cap-binding protein subunit 1	-0.143132	-0.177981	-0.160452		45.291	19.896	125	102	21	21	21	21	295090000	284930000	564670000	709940000	37.8	>sp|Q09161|NCBP1_HUMAN Nuclear cap-binding protein subunit 1 OS=Homo sapiens GN=NCBP1 PE=1 SV=1
P46776	RPL27A	60S ribosomal protein L27a	-0.464459	0.0910334	-0.160141		10.301	10.55	42	35	6	5	6	5	551360000	660380000	1819200000	2031400000	37.2	>sp|P46776|RL27A_HUMAN 60S ribosomal protein L27a OS=Homo sapiens GN=RPL27A PE=1 SV=2
O14949	UQCRQ	Cytochrome b-c1 complex subunit 8	-0.171335	-0.148999	-0.160124		9.5799	13.687	19	17	3	5	3	5	78038000	79432000	280170000	355680000	53.7	>sp|O14949|QCR8_HUMAN Cytochrome b-c1 complex subunit 8 OS=Homo sapiens GN=UQCRQ PE=1 SV=4
Q6UXH1	CRELD2	Cysteine-rich with EGF-like domain protein 2	0.0143248	-0.358059	-0.159885		27.123	16.65	18	26	6	5	6	5	42899000	37232000	150100000	203220000	24.9	>sp|Q6UXH1|CREL2_HUMAN Cysteine-rich with EGF-like domain protein 2 OS=Homo sapiens GN=CRELD2 PE=1 SV=1
Q92508	PIEZO1	Piezo-type mechanosensitive ion channel component 1	-0.838912	0.300058	-0.159832		51.821	57.832	9	12	6	5	6	5	6950600	13143000	207650000	141070000	5.2	>sp|Q92508|PIEZ1_HUMAN Piezo-type mechanosensitive ion channel component 1 OS=Homo sapiens GN=PIEZO1 PE=1 SV=4
Q8TB22	SPATA20	Spermatogenesis-associated protein 20	-0.367818	0.0220826	-0.159736		20.697	30.109	16	31	8	10	8	10	9404000	10603000	194690000	88007000	25.1	>sp|Q8TB22|SPT20_HUMAN Spermatogenesis-associated protein 20 OS=Homo sapiens GN=SPATA20 PE=2 SV=3
Q86U28	ISCA2	Iron-sulfur cluster assembly 2 homolog, mitochondrial	-0.119688	-0.200755	-0.159653		36.682	3.5601	3	4	2	2	2	2	3827700	3118300	8106200	8259100	15.6	>sp|Q86U28|ISCA2_HUMAN Iron-sulfur cluster assembly 2 homolog, mitochondrial OS=Homo sapiens GN=ISCA2 PE=1 SV=2
Q6P4F2	FDX1L	Adrenodoxin-like protein, mitochondrial	-0.175684	-0.142217	-0.158854		55.618	9.3627	7	9	3	3	3	3	4861300	5025800	25578000	34074000	23.5	>sp|Q6P4F2|ADXL_HUMAN Adrenodoxin-like protein, mitochondrial OS=Homo sapiens GN=FDX1L PE=1 SV=1
Q9Y676	MRPS18B	28S ribosomal protein S18b, mitochondrial	-0.122474	-0.1956	-0.158574		40.86	21.718	41	51	7	8	7	8	144240000	140640000	253990000	336010000	47.7	>sp|Q9Y676|RT18B_HUMAN 28S ribosomal protein S18b, mitochondrial OS=Homo sapiens GN=MRPS18B PE=1 SV=1
O15027	SEC16A	Protein transport protein Sec16A	-0.328262	-0.00633399	-0.158337		22.664	22.812	145	109	35	39	35	39	188550000	206850000	448860000	508940000	35.3	>sp|O15027|SC16A_HUMAN Protein transport protein Sec16A OS=Homo sapiens GN=SEC16A PE=1 SV=3
Q68CP9	ARID2	AT-rich interactive domain-containing protein 2	-0.167487	-0.148999	-0.158213		17.555	26.376	5	9	4	6	4	6	2762500	2633100	13492000	14077000	7.1	>sp|Q68CP9|ARID2_HUMAN AT-rich interactive domain-containing protein 2 OS=Homo sapiens GN=ARID2 PE=1 SV=2
O60437	PPL	Periplakin	-0.238665	-0.0813395	-0.157859		11.352	29.022	27	20	16	15	16	15	38311000	37808000	19442000	23293000	17	>sp|O60437|PEPL_HUMAN Periplakin OS=Homo sapiens GN=PPL PE=1 SV=4
Q5JTV8	TOR1AIP1	Torsin-1A-interacting protein 1	-0.211386	-0.105678	-0.157564		22.554	20.166	97	96	19	17	18	16	365910000	390400000	720230000	884320000	48	>sp|Q5JTV8|TOIP1_HUMAN Torsin-1A-interacting protein 1 OS=Homo sapiens GN=TOR1AIP1 PE=1 SV=2
Q8IWT6	LRRC8A	Leucine-rich repeat-containing protein 8A	-0.212507	-0.103531	-0.156991		20.488	25.33	38	44	17	18	17	17	42350000	43637000	139500000	147980000	32.5	>sp|Q8IWT6|LRC8A_HUMAN Leucine-rich repeat-containing protein 8A OS=Homo sapiens GN=LRRC8A PE=1 SV=1
O60783	MRPS14	28S ribosomal protein S14, mitochondrial	-0.162468	-0.151469	-0.156958		15.203	11.713	14	25	2	3	2	3	36009000	33592000	112380000	156730000	28.9	>sp|O60783|RT14_HUMAN 28S ribosomal protein S14, mitochondrial OS=Homo sapiens GN=MRPS14 PE=1 SV=1
Q12846	STX4	Syntaxin-4	-0.128821	-0.185359	-0.156813		17.265	21.459	39	39	10	9	10	9	92762000	88656000	144890000	200160000	51.2	>sp|Q12846|STX4_HUMAN Syntaxin-4 OS=Homo sapiens GN=STX4 PE=1 SV=2
Q15005	SPCS2	Signal peptidase complex subunit 2	-0.315914	-0.0132121	-0.156639		20.848	30.252	63	74	8	9	8	9	164480000	185020000	669170000	872080000	41.6	>sp|Q15005|SPCS2_HUMAN Signal peptidase complex subunit 2 OS=Homo sapiens GN=SPCS2 PE=1 SV=3
P62241	RPS8	40S ribosomal protein S8	-0.361881	0.023299	-0.156474		17.421	30.946	114	120	11	11	11	11	1125800000	1332300000	4707800000	5269700000	55.3	>sp|P62241|RS8_HUMAN 40S ribosomal protein S8 OS=Homo sapiens GN=RPS8 PE=1 SV=2
Q8NC56	LEMD2	LEM domain-containing protein 2	-0.185359	-0.127765	-0.156275		23.443	22.432	7	19	5	9	5	9	6631900	7232400	60074000	66892000	22.5	>sp|Q8NC56|LEMD2_HUMAN LEM domain-containing protein 2 OS=Homo sapiens GN=LEMD2 PE=1 SV=1
O94906	PRPF6	Pre-mRNA-processing factor 6	-0.151209	-0.16092	-0.156057		25.309	36.126	154	165	32	35	32	35	328880000	331890000	1079900000	1314200000	48.2	>sp|O94906|PRP6_HUMAN Pre-mRNA-processing factor 6 OS=Homo sapiens GN=PRPF6 PE=1 SV=1
Q99714	HSD17B10	3-hydroxyacyl-CoA dehydrogenase type-2	-0.220454	-0.0930191	-0.15533		24.93	14.418	341	232	19	16	19	16	2467400000	2461300000	4179100000	5012200000	92.7	>sp|Q99714|HCD2_HUMAN 3-hydroxyacyl-CoA dehydrogenase type-2 OS=Homo sapiens GN=HSD17B10 PE=1 SV=3
P46777	RPL5	60S ribosomal protein L5	-0.395721	0.0509208	-0.155184		19.39	15.519	191	175	14	12	14	12	1365700000	1529400000	4603600000	4893300000	43.4	>sp|P46777|RL5_HUMAN 60S ribosomal protein L5 OS=Homo sapiens GN=RPL5 PE=1 SV=3
Q16514	TAF12	Transcription initiation factor TFIID subunit 12	0.243062	-0.707083	-0.155165		26.026	33.436	3	3	2	2	2	2	1194100	745500	5066200	5124400	22.4	>sp|Q16514|TAF12_HUMAN Transcription initiation factor TFIID subunit 12 OS=Homo sapiens GN=TAF12 PE=1 SV=1
Q08211	DHX9	ATP-dependent RNA helicase A	-0.184978	-0.125783	-0.155077		19.809	29.475	567	557	53	49	53	49	3562600000	3613400000	11600000000	14380000000	53.9	>sp|Q08211|DHX9_HUMAN ATP-dependent RNA helicase A OS=Homo sapiens GN=DHX9 PE=1 SV=4
Q5M775	SPECC1	Cytospin-B	-0.0754641	-0.238053	-0.154469		43.855	15.553	11	8	6	3	6	3	11079000	12039000	112940000	133490000	6.6	>sp|Q5M775|CYTSB_HUMAN Cytospin-B OS=Homo sapiens GN=SPECC1 PE=1 SV=1
P82664	MRPS10	28S ribosomal protein S10, mitochondrial	-0.106214	-0.201759	-0.153196		16.367	13.081	6	13	2	2	2	2	10037000	9790800	70450000	94734000	20.4	>sp|P82664|RT10_HUMAN 28S ribosomal protein S10, mitochondrial OS=Homo sapiens GN=MRPS10 PE=1 SV=2
Q9UP83	COG5	Conserved oligomeric Golgi complex subunit 5	-0.126973	-0.179001	-0.152753		31.81	13.228	30	37	9	12	9	12	18247000	15029000	54623000	65180000	24.7	>sp|Q9UP83|COG5_HUMAN Conserved oligomeric Golgi complex subunit 5 OS=Homo sapiens GN=COG5 PE=1 SV=3
P13073	COX4I1	Cytochrome c oxidase subunit 4 isoform 1, mitochondrial	-0.258941	-0.0536674	-0.152656		19.132	12.836	136	124	14	10	14	10	1215500000	1237500000	5070000000	5956200000	58.6	>sp|P13073|COX41_HUMAN Cytochrome c oxidase subunit 4 isoform 1, mitochondrial OS=Homo sapiens GN=COX4I1 PE=1 SV=1
Q14137	BOP1	Ribosome biogenesis protein BOP1	-0.36042	0.0291022	-0.152553		17.864	19.725	81	84	18	18	18	18	168570000	161420000	428860000	468540000	41.8	>sp|Q14137|BOP1_HUMAN Ribosome biogenesis protein BOP1 OS=Homo sapiens GN=BOP1 PE=1 SV=2
O96000	NDUFB10	NADH dehydrogenase [ubiquinone] 1 beta subcomplex subunit 10	-0.170822	-0.133827	-0.152206		36.532	15.824	45	53	6	8	6	8	193030000	203810000	512660000	656140000	51.2	>sp|O96000|NDUBA_HUMAN NADH dehydrogenase [ubiquinone] 1 beta subcomplex subunit 10 OS=Homo sapiens GN=NDUFB10 PE=1 SV=3
Q9Y4A5	TRRAP	Transformation/transcription domain-associated protein	-0.124725	-0.180148	-0.15217		23.563	17.992	26	23	13	19	13	19	14956000	13499000	25520000	33208000	10.6	>sp|Q9Y4A5|TRRAP_HUMAN Transformation/transcription domain-associated protein OS=Homo sapiens GN=TRRAP PE=1 SV=3
Q9NQC3	RTN4	Reticulon-4	-0.154842	-0.148218	-0.151526		23.057	27.619	124	142	12	11	12	11	1619100000	1496300000	4039400000	5089300000	25	>sp|Q9NQC3|RTN4_HUMAN Reticulon-4 OS=Homo sapiens GN=RTN4 PE=1 SV=2
Q5SSJ5	HP1BP3	Heterochromatin protein 1-binding protein 3	-0.0692898	-0.238175	-0.151263		27.422	19.622	131	86	21	17	21	17	606480000	532020000	1463500000	1823300000	40.3	>sp|Q5SSJ5|HP1B3_HUMAN Heterochromatin protein 1-binding protein 3 OS=Homo sapiens GN=HP1BP3 PE=1 SV=1
Q71RG4	TMUB2	Transmembrane and ubiquitin-like domain-containing protein 2	-0.435735	0.0865227	-0.151102		21.322	13.354	23	25	5	6	5	6	42258000	49041000	126650000	137850000	29.3	>sp|Q71RG4|TMUB2_HUMAN Transmembrane and ubiquitin-like domain-containing protein 2 OS=Homo sapiens GN=TMUB2 PE=2 SV=2
Q8IUF8	MINA	Bifunctional lysine-specific demethylase and histidyl-hydroxylase MINA	-0.168899	-0.1333	-0.15099		14.495	15.33	51	42	8	7	8	7	35866000	35753000	124080000	147610000	25.2	>sp|Q8IUF8|MINA_HUMAN Bifunctional lysine-specific demethylase and histidyl-hydroxylase MINA OS=Homo sapiens GN=MINA PE=1 SV=1
P53985	SLC16A1	Monocarboxylate transporter 1	-0.177854	-0.123931	-0.150641		44.68	24.4	41	65	7	7	7	7	248930000	232350000	1193700000	1371000000	13.4	>sp|P53985|MOT1_HUMAN Monocarboxylate transporter 1 OS=Homo sapiens GN=SLC16A1 PE=1 SV=3
Q96KC8	DNAJC1	DnaJ homolog subfamily C member 1	-0.276556	-0.0347791	-0.150609		37.152	18.254	30	31	12	10	12	10	97030000	68019000	89072000	108770000	33.4	>sp|Q96KC8|DNJC1_HUMAN DnaJ homolog subfamily C member 1 OS=Homo sapiens GN=DNAJC1 PE=1 SV=1
O15042	U2SURP	U2 snRNP-associated SURP motif-containing protein	-0.0958569	-0.207393	-0.150547		30.178	24.2	175	110	35	27	35	27	354240000	316150000	811340000	743870000	40.6	>sp|O15042|SR140_HUMAN U2 snRNP-associated SURP motif-containing protein OS=Homo sapiens GN=U2SURP PE=1 SV=2
Q99808	SLC29A1	Equilibrative nucleoside transporter 1	-0.0508848	-0.257131	-0.150326		103.97	34.082	7	12	3	4	3	4	61745000	11894000	38775000	47496000	9.6	>sp|Q99808|S29A1_HUMAN Equilibrative nucleoside transporter 1 OS=Homo sapiens GN=SLC29A1 PE=1 SV=3
Q01831	XPC	DNA repair protein complementing XP-C cells	-0.0867838	-0.216486	-0.150178		17.523	18.597	80	52	18	16	18	16	176350000	162590000	226820000	295360000	32.8	>sp|Q01831|XPC_HUMAN DNA repair protein complementing XP-C cells OS=Homo sapiens GN=XPC PE=1 SV=4
Q9Y3E5	PTRH2	Peptidyl-tRNA hydrolase 2, mitochondrial	-0.238298	-0.0666748	-0.149936		20.093	35.076	53	49	7	5	7	5	144060000	143560000	599280000	732090000	57	>sp|Q9Y3E5|PTH2_HUMAN Peptidyl-tRNA hydrolase 2, mitochondrial OS=Homo sapiens GN=PTRH2 PE=1 SV=1
Q7Z5G4	GOLGA7	Golgin subfamily A member 7	-0.237074	-0.0676387	-0.14987		7.4334	11.75	7	19	3	5	3	5	29223000	41760000	81434000	100390000	38	>sp|Q7Z5G4|GOGA7_HUMAN Golgin subfamily A member 7 OS=Homo sapiens GN=GOLGA7 PE=1 SV=2
Q86UE4	MTDH	Protein LYRIC	-0.13606	-0.162339	-0.14914		17.535	20.536	111	100	21	22	21	22	310520000	245660000	459940000	510630000	49.1	>sp|Q86UE4|LYRIC_HUMAN Protein LYRIC OS=Homo sapiens GN=MTDH PE=1 SV=2
P51991	HNRNPA3	Heterogeneous nuclear ribonucleoprotein A3	-0.13711	-0.159242	-0.148133		52.862	28.802	288	247	18	19	18	19	5942400000	5528700000	14969000000	19728000000	51.1	>sp|P51991|ROA3_HUMAN Heterogeneous nuclear ribonucleoprotein A3 OS=Homo sapiens GN=HNRNPA3 PE=1 SV=2
P11150	LIPC	Hepatic triacylglycerol lipase	-0.228973	-0.0709388	-0.147793		32.39	23.417	13	12	5	7	5	7	13550000	14486000	25183000	26373000	22	>sp|P11150|LIPC_HUMAN Hepatic triacylglycerol lipase OS=Homo sapiens GN=LIPC PE=1 SV=3
Q14678	KANK1	KN motif and ankyrin repeat domain-containing protein 1	-0.386149	0.0570613	-0.147591		31.598	22.903	18	20	9	10	9	10	12826000	13099000	21311000	24657000	15.3	>sp|Q14678|KANK1_HUMAN KN motif and ankyrin repeat domain-containing protein 1 OS=Homo sapiens GN=KANK1 PE=1 SV=3
Q3ZAQ7	VMA21	Vacuolar ATPase assembly integral membrane protein VMA21	-0.0677763	-0.231432	-0.147285		28.889	15.136	15	13	2	2	2	2	22362000	20855000	40271000	52244000	24.8	>sp|Q3ZAQ7|VMA21_HUMAN Vacuolar ATPase assembly integral membrane protein VMA21 OS=Homo sapiens GN=VMA21 PE=1 SV=1
Q9BX68	HINT2	Histidine triad nucleotide-binding protein 2, mitochondrial	-0.181421	-0.113834	-0.147231		20.945	10.961	77	76	6	6	6	6	546750000	537200000	1443600000	1715400000	59.5	>sp|Q9BX68|HINT2_HUMAN Histidine triad nucleotide-binding protein 2, mitochondrial OS=Homo sapiens GN=HINT2 PE=1 SV=1
Q53GS9	USP39	U4/U6.U5 tri-snRNP-associated protein 2	-0.192321	-0.102725	-0.146827		13.926	12.997	122	93	16	15	16	15	188040000	195410000	420100000	500450000	35.4	>sp|Q53GS9|SNUT2_HUMAN U4/U6.U5 tri-snRNP-associated protein 2 OS=Homo sapiens GN=USP39 PE=1 SV=2
Q9NV06	DCAF13	DDB1- and CUL4-associated factor 13	-0.413486	0.0785027	-0.14662		11.013	13.644	9	17	3	7	3	7	8835800	10714000	48799000	51007000	18.4	>sp|Q9NV06|DCA13_HUMAN DDB1- and CUL4-associated factor 13 OS=Homo sapiens GN=DCAF13 PE=1 SV=2
P35240	NF2	Merlin	-0.159758	-0.133564	-0.146601		26.952	15.13	5	8	4	4	4	4	2310700	1729500	13910000	15107000	13.3	>sp|P35240|MERL_HUMAN Merlin OS=Homo sapiens GN=NF2 PE=1 SV=1
P42677	RPS27	40S ribosomal protein S27	-0.38637	0.0591342	-0.146489		28.058	13.491	63	69	5	5	3	3	529290000	592360000	2502500000	2767600000	40.5	>sp|P42677|RS27_HUMAN 40S ribosomal protein S27 OS=Homo sapiens GN=RPS27 PE=1 SV=3
Q8NBS9	TXNDC5	Thioredoxin domain-containing protein 5	-0.0492126	-0.250476	-0.146338		24.148	16.716	181	170	20	15	20	15	2061200000	1937700000	5693700000	7645600000	44.9	>sp|Q8NBS9|TXND5_HUMAN Thioredoxin domain-containing protein 5 OS=Homo sapiens GN=TXNDC5 PE=1 SV=2
Q6KC79	NIPBL	Nipped-B-like protein	-0.0593554	-0.238542	-0.146169		18.836	20.586	75	73	20	32	20	32	47214000	33969000	119050000	162280000	19	>sp|Q6KC79|NIPBL_HUMAN Nipped-B-like protein OS=Homo sapiens GN=NIPBL PE=1 SV=2
Q13740	ALCAM	CD166 antigen	-0.0969364	-0.196355	-0.14579		17.784	17.982	107	76	18	15	18	15	213880000	199490000	354370000	443790000	50.3	>sp|Q13740|CD166_HUMAN CD166 antigen OS=Homo sapiens GN=ALCAM PE=1 SV=2
O75643	SNRNP200	U5 small nuclear ribonucleoprotein 200 kDa helicase	-0.171079	-0.12075	-0.145695		23.033	19.231	564	573	90	80	90	80	1552900000	1518400000	4055600000	4780700000	54.3	>sp|O75643|U520_HUMAN U5 small nuclear ribonucleoprotein 200 kDa helicase OS=Homo sapiens GN=SNRNP200 PE=1 SV=2
P39060	COL18A1	Collagen alpha-1(XVIII) chain	-0.254957	-0.0439044	-0.145575		37.937	14.721	49	50	14	16	14	16	352380000	128380000	198480000	371460000	18.1	>sp|P39060|COIA1_HUMAN Collagen alpha-1(XVIII) chain OS=Homo sapiens GN=COL18A1 PE=1 SV=5
P61009	SPCS3	Signal peptidase complex subunit 3	-0.156526	-0.134615	-0.145529		10.841	16.442	13	23	3	4	3	4	102950000	92514000	403620000	513320000	21.7	>sp|P61009|SPCS3_HUMAN Signal peptidase complex subunit 3 OS=Homo sapiens GN=SPCS3 PE=1 SV=1
Q9NY12	GAR1	H/ACA ribonucleoprotein complex subunit 1	-0.10017	-0.192068	-0.145388		30.987	28.59	48	34	5	6	5	6	287040000	289840000	398190000	562390000	28.1	>sp|Q9NY12|GAR1_HUMAN H/ACA ribonucleoprotein complex subunit 1 OS=Homo sapiens GN=GAR1 PE=1 SV=1
Q9H0E9	BRD8	Bromodomain-containing protein 8	-0.234011	-0.0611541	-0.144995		69.273	15.285	4	12	3	6	3	6	2811100	4546000	18834000	19407000	7.3	>sp|Q9H0E9|BRD8_HUMAN Bromodomain-containing protein 8 OS=Homo sapiens GN=BRD8 PE=1 SV=2
Q7Z2T5	TRMT1L	TRMT1-like protein	-0.0517201	-0.244644	-0.144959		37.836	54.164	9	6	4	4	4	4	7402200	6872200	17086000	22114000	16.4	>sp|Q7Z2T5|TRM1L_HUMAN TRMT1-like protein OS=Homo sapiens GN=TRMT1L PE=1 SV=2
Q9P206	KIAA1522	Uncharacterized protein KIAA1522	0.0529847	-0.373509	-0.144559		24.208	4.2653	6	3	4	2	4	2	3100000	2557300	3395300	5680300	7.4	>sp|Q9P206|K1522_HUMAN Uncharacterized protein KIAA1522 OS=Homo sapiens GN=KIAA1522 PE=1 SV=2
Q9P0U1	TOMM7	Mitochondrial import receptor subunit TOM7 homolog	-0.185867	-0.104068	-0.144388		11.647	12.565	15	10	3	3	3	3	72001000	71853000	164080000	213440000	45.5	>sp|Q9P0U1|TOM7_HUMAN Mitochondrial import receptor subunit TOM7 homolog OS=Homo sapiens GN=TOMM7 PE=1 SV=1
A6NCS6	C2orf72	Uncharacterized protein C2orf72	-0.0350608	-0.262674	-0.144383		37.632	26.474	34	46	8	8	8	8	69798000	92466000	118860000	166760000	58.6	>sp|A6NCS6|CB072_HUMAN Uncharacterized protein C2orf72 OS=Homo sapiens GN=C2orf72 PE=2 SV=2
Q9BZQ6	EDEM3	ER degradation-enhancing alpha-mannosidase-like protein 3	-0.304861	0.000750337	-0.143978		28.357	18.573	6	13	4	6	4	6	3970400	4428900	27181000	33005000	12	>sp|Q9BZQ6|EDEM3_HUMAN ER degradation-enhancing alpha-mannosidase-like protein 3 OS=Homo sapiens GN=EDEM3 PE=1 SV=2
Q9NZM3	ITSN2	Intersectin-2	-0.166844	-0.121413	-0.14395		12.067	26.917	4	16	2	8	2	8	2261000	2044400	24755000	21662000	7	>sp|Q9NZM3|ITSN2_HUMAN Intersectin-2 OS=Homo sapiens GN=ITSN2 PE=1 SV=3
Q9NQ50	MRPL40	39S ribosomal protein L40, mitochondrial	-0.138683	-0.148479	-0.143573		17.471	25.93	42	26	6	6	6	6	68546000	67048000	145110000	172480000	32	>sp|Q9NQ50|RM40_HUMAN 39S ribosomal protein L40, mitochondrial OS=Homo sapiens GN=MRPL40 PE=1 SV=1
Q12849	GRSF1	G-rich sequence factor 1	-0.222063	-0.0690147	-0.14351		56.731	16.27	50	54	14	15	14	15	71242000	70017000	218400000	230900000	50	>sp|Q12849|GRSF1_HUMAN G-rich sequence factor 1 OS=Homo sapiens GN=GRSF1 PE=1 SV=3
Q7L592	NDUFAF7	NADH dehydrogenase [ubiquinone] complex I, assembly factor 7	-0.225398	-0.065848	-0.143419		27.489	28.773	4	5	2	4	2	4	1747200	2126800	26344000	31406000	15.9	>sp|Q7L592|NDUF7_HUMAN NADH dehydrogenase [ubiquinone] complex I, assembly factor 7 OS=Homo sapiens GN=NDUFAF7 PE=1 SV=1
P23634	ATP2B4	Plasma membrane calcium-transporting ATPase 4	-0.174023	-0.112767	-0.14307		5.9359	20.093	7	15	4	6	4	6	6650800	5850400	23958000	26716000	22.2	>sp|P23634|AT2B4_HUMAN Plasma membrane calcium-transporting ATPase 4 OS=Homo sapiens GN=ATP2B4 PE=1 SV=2
Q96AD5	PNPLA2	Patatin-like phospholipase domain-containing protein 2	-0.318114	0.0132905	-0.142917		17.252	15.949	20	15	7	6	7	6	19094000	20859000	45030000	44454000	29.4	>sp|Q96AD5|PLPL2_HUMAN Patatin-like phospholipase domain-containing protein 2 OS=Homo sapiens GN=PNPLA2 PE=1 SV=1
P50402	EMD	Emerin	-0.160533	-0.125254	-0.142786		29.164	21.507	48	50	11	10	11	10	149120000	164990000	302610000	382850000	57.5	>sp|P50402|EMD_HUMAN Emerin OS=Homo sapiens GN=EMD PE=1 SV=1
Q8WXF1	PSPC1	Paraspeckle component 1	-0.0795658	-0.208767	-0.142721		17.883	24.791	203	192	20	20	20	20	1387600000	1246600000	3431600000	4413000000	46.8	>sp|Q8WXF1|PSPC1_HUMAN Paraspeckle component 1 OS=Homo sapiens GN=PSPC1 PE=1 SV=1
Q9NX63	CHCHD3	Coiled-coil-helix-coiled-coil-helix domain-containing protein 3, mitochondrial	-0.120352	-0.16543	-0.142715		18.587	33.174	89	61	13	12	13	12	437970000	411710000	1565100000	1878200000	48.5	>sp|Q9NX63|CHCH3_HUMAN Coiled-coil-helix-coiled-coil-helix domain-containing protein 3, mitochondrial OS=Homo sapiens GN=CHCHD3 PE=1 SV=1
Q9HAS0	C17orf75	Protein Njmu-R1	-0.248413	-0.0437644	-0.142463		19.114	7.7023	15	6	5	3	5	3	5910900	5541500	8119900	11199000	25.5	>sp|Q9HAS0|NJMU_HUMAN Protein Njmu-R1 OS=Homo sapiens GN=C17orf75 PE=1 SV=2
Q07157	TJP1	Tight junction protein ZO-1	-0.205518	-0.0817486	-0.142306		22.523	21.379	102	98	34	37	34	37	148740000	134830000	330920000	383240000	38.4	>sp|Q07157|ZO1_HUMAN Tight junction protein ZO-1 OS=Homo sapiens GN=TJP1 PE=1 SV=3
Q29RF7	PDS5A	Sister chromatid cohesion protein PDS5 homolog A	-0.120219	-0.1644	-0.142141		25.518	17.954	69	57	24	24	24	24	79957000	77970000	218570000	256720000	37.5	>sp|Q29RF7|PDS5A_HUMAN Sister chromatid cohesion protein PDS5 homolog A OS=Homo sapiens GN=PDS5A PE=1 SV=1
P48728	AMT	Aminomethyltransferase, mitochondrial	-0.0877344	-0.198243	-0.141931		19.854	17.049	56	39	15	9	15	9	89554000	83783000	282160000	365680000	56.1	>sp|P48728|GCST_HUMAN Aminomethyltransferase, mitochondrial OS=Homo sapiens GN=AMT PE=1 SV=1
P43007	SLC1A4	Neutral amino acid transporter A	-0.318809	0.0159285	-0.141753		9.142	12.173	3	10	2	2	2	2	12458000	25103000	41185000	53478000	7.1	>sp|P43007|SATT_HUMAN Neutral amino acid transporter A OS=Homo sapiens GN=SLC1A4 PE=1 SV=1
Q5SY16	NOL9	Polynucleotide 5-hydroxyl-kinase NOL9	-0.314058	0.0123736	-0.141629		15.85	28.434	36	8	8	4	8	4	25938000	28219000	33601000	38297000	22.5	>sp|Q5SY16|NOL9_HUMAN Polynucleotide 5-hydroxyl-kinase NOL9 OS=Homo sapiens GN=NOL9 PE=1 SV=1
Q9H5K3	SGK196	Probable inactive protein kinase-like protein SgK196	-0.284396	-0.0113525	-0.141424		16.852	71.596	29	19	8	4	8	4	32322000	33982000	60183000	63919000	42.3	>sp|Q9H5K3|SG196_HUMAN Probable inactive protein kinase-like protein SgK196 OS=Homo sapiens GN=SGK196 PE=2 SV=1
Q5RI15	COX20	Cytochrome c oxidase protein 20 homolog	-0.187134	-0.0970714	-0.1414		17.18	17.717	32	26	4	4	4	4	213370000	148310000	297530000	372560000	23.7	>sp|Q5RI15|COX20_HUMAN Cytochrome c oxidase protein 20 homolog OS=Homo sapiens GN=COX20 PE=1 SV=2
Q5VT25	CDC42BPA	Serine/threonine-protein kinase MRCK alpha	-0.178874	-0.104739	-0.14133		22.169	15.454	12	21	8	11	6	10	14948000	18140000	34339000	37208000	11.1	>sp|Q5VT25|MRCKA_HUMAN Serine/threonine-protein kinase MRCK alpha OS=Homo sapiens GN=CDC42BPA PE=1 SV=1
Q9BUQ8	DDX23	Probable ATP-dependent RNA helicase DDX23	-0.126841	-0.154972	-0.140838		19.978	25.739	121	143	31	29	31	29	309060000	288600000	1215900000	1409500000	49.9	>sp|Q9BUQ8|DDX23_HUMAN Probable ATP-dependent RNA helicase DDX23 OS=Homo sapiens GN=DDX23 PE=1 SV=3
P49790	NUP153	Nuclear pore complex protein Nup153	-0.0992279	-0.182947	-0.14048		22.585	21.529	106	53	30	22	30	22	133930000	128170000	195180000	210620000	38.8	>sp|P49790|NU153_HUMAN Nuclear pore complex protein Nup153 OS=Homo sapiens GN=NUP153 PE=1 SV=2
Q96HP4	OXNAD1	Oxidoreductase NAD-binding domain-containing protein 1	-0.24123	-0.0462816	-0.140465		21.364	32.459	10	7	4	4	4	4	7399700	7182200	33916000	34438000	33.3	>sp|Q96HP4|OXND1_HUMAN Oxidoreductase NAD-binding domain-containing protein 1 OS=Homo sapiens GN=OXNAD1 PE=1 SV=1
Q8TDD1	DDX54	ATP-dependent RNA helicase DDX54	-0.224534	-0.0608774	-0.140387		20.915	23.786	41	38	14	10	14	10	38494000	41392000	100930000	118310000	27.2	>sp|Q8TDD1|DDX54_HUMAN ATP-dependent RNA helicase DDX54 OS=Homo sapiens GN=DDX54 PE=1 SV=2
Q9BSH5	HDHD3	Haloacid dehalogenase-like hydrolase domain-containing protein 3	-0.143002	-0.136848	-0.139921		18.803	14.551	61	66	11	11	11	11	200230000	212600000	492150000	612880000	66.5	>sp|Q9BSH5|HDHD3_HUMAN Haloacid dehalogenase-like hydrolase domain-containing protein 3 OS=Homo sapiens GN=HDHD3 PE=1 SV=1
O43677	NDUFC1	NADH dehydrogenase [ubiquinone] 1 subunit C1, mitochondrial	-0.157432	-0.122209	-0.139713		39.255	13.782	8	19	2	2	2	2	13400000	17906000	95744000	110590000	27.6	>sp|O43677|NDUC1_HUMAN NADH dehydrogenase [ubiquinone] 1 subunit C1, mitochondrial OS=Homo sapiens GN=NDUFC1 PE=2 SV=1
P50336	PPOX	Protoporphyrinogen oxidase	-0.180784	-0.0993626	-0.139499		20.003	20.338	18	12	3	3	3	3	9837400	11411000	43415000	55268000	15.5	>sp|P50336|PPOX_HUMAN Protoporphyrinogen oxidase OS=Homo sapiens GN=PPOX PE=1 SV=1
O94880	PHF14	PHD finger protein 14	-0.0247452	-0.263996	-0.139417		21.717	21.674	28	15	10	9	10	9	28362000	24430000	41193000	48311000	22.4	>sp|O94880|PHF14_HUMAN PHD finger protein 14 OS=Homo sapiens GN=PHF14 PE=1 SV=2
Q15424	SAFB	Scaffold attachment factor B1	-0.0780633	-0.203264	-0.139306		19.711	27.721	85	77	14	14	14	14	493170000	424520000	993520000	1330500000	34.2	>sp|Q15424|SAFB1_HUMAN Scaffold attachment factor B1 OS=Homo sapiens GN=SAFB PE=1 SV=4
P62910	RPL32	60S ribosomal protein L32	-0.227618	-0.0560286	-0.139274		27.408	21.467	57	42	6	5	6	5	220900000	235900000	732710000	807250000	43.7	>sp|P62910|RL32_HUMAN 60S ribosomal protein L32 OS=Homo sapiens GN=RPL32 PE=1 SV=2
Q6UWZ7	FAM175A	BRCA1-A complex subunit Abraxas	-0.153416	-0.12499	-0.139133		25.184	11.293	5	5	3	2	3	2	1608100	1366500	34969000	40191000	15.6	>sp|Q6UWZ7|F175A_HUMAN BRCA1-A complex subunit Abraxas OS=Homo sapiens GN=FAM175A PE=1 SV=2
Q6DKK2	TTC19	Tetratricopeptide repeat protein 19, mitochondrial	-0.14978	-0.127369	-0.138531		17.416	15.881	3	10	2	6	2	6	719180	595490	16000000	19118000	24.5	>sp|Q6DKK2|TTC19_HUMAN Tetratricopeptide repeat protein 19, mitochondrial OS=Homo sapiens GN=TTC19 PE=1 SV=4
Q9H0R3	TMEM222	Transmembrane protein 222	-0.292075	0.000548348	-0.138357		26.665	26.262	13	13	3	3	3	3	20273000	23385000	45016000	45953000	22.1	>sp|Q9H0R3|TM222_HUMAN Transmembrane protein 222 OS=Homo sapiens GN=TMEM222 PE=2 SV=2
Q5J8M3	EMC4	ER membrane protein complex subunit 4	-0.212507	-0.0666748	-0.137749		12.413	12.514	11	13	4	3	4	3	33337000	35628000	88341000	96699000	40.4	>sp|Q5J8M3|EMC4_HUMAN ER membrane protein complex subunit 4 OS=Homo sapiens GN=EMC4 PE=1 SV=2
Q15648	MED1	Mediator of RNA polymerase II transcription subunit 1	-0.0478175	-0.233029	-0.137453		38.304	25.653	37	35	18	16	18	16	35753000	29251000	75679000	89079000	23.3	>sp|Q15648|MED1_HUMAN Mediator of RNA polymerase II transcription subunit 1 OS=Homo sapiens GN=MED1 PE=1 SV=4
P23229	ITGA6	Integrin alpha-6	-0.0750534	-0.202637	-0.137435		23.81	23.975	30	37	14	14	14	14	28350000	31223000	66578000	86467000	22.8	>sp|P23229|ITA6_HUMAN Integrin alpha-6 OS=Homo sapiens GN=ITGA6 PE=1 SV=5
Q8NHH9	ATL2	Atlastin-2	-0.289244	0.000649432	-0.137028		19.705	21.713	81	92	14	13	14	13	140300000	142640000	460820000	494840000	37.7	>sp|Q8NHH9|ATLA2_HUMAN Atlastin-2 OS=Homo sapiens GN=ATL2 PE=1 SV=2
O14936	CASK	Peripheral plasma membrane protein CASK	-0.208143	-0.0691522	-0.136974		19.334	15.01	82	65	19	20	19	20	124570000	119370000	286420000	312330000	30.6	>sp|O14936|CSKP_HUMAN Peripheral plasma membrane protein CASK OS=Homo sapiens GN=CASK PE=1 SV=3
P83731	RPL24	60S ribosomal protein L24	-0.342327	0.042858	-0.136917		39.437	16.867	70	40	8	6	8	6	567680000	615330000	1293500000	1411600000	41.4	>sp|P83731|RL24_HUMAN 60S ribosomal protein L24 OS=Homo sapiens GN=RPL24 PE=1 SV=1
Q05D32	CTDSPL2	CTD small phosphatase-like protein 2	-0.135798	-0.138028	-0.136912		14.503	18.939	8	8	3	5	3	5	3021300	3494600	14084000	18147000	12.2	>sp|Q05D32|CTSL2_HUMAN CTD small phosphatase-like protein 2 OS=Homo sapiens GN=CTDSPL2 PE=1 SV=2
P30519	HMOX2	Heme oxygenase 2	-0.237441	-0.0426443	-0.136758		18.546	15.312	52	47	11	12	11	12	126020000	124420000	277420000	317640000	48.4	>sp|P30519|HMOX2_HUMAN Heme oxygenase 2 OS=Homo sapiens GN=HMOX2 PE=1 SV=2
Q9Y6I4	USP3	Ubiquitin carboxyl-terminal hydrolase 3	-0.212134	-0.064607	-0.136485		11.859	22.577	7	10	3	6	3	6	3378200	3294000	17065000	21927000	18.1	>sp|Q9Y6I4|UBP3_HUMAN Ubiquitin carboxyl-terminal hydrolase 3 OS=Homo sapiens GN=USP3 PE=1 SV=2
Q8TC12	RDH11	Retinol dehydrogenase 11	-0.207268	-0.0686019	-0.13627		15.665	15.449	59	74	9	11	9	11	230760000	226480000	847190000	994760000	40.9	>sp|Q8TC12|RDH11_HUMAN Retinol dehydrogenase 11 OS=Homo sapiens GN=RDH11 PE=1 SV=2
O60264	SMARCA5	SWI/SNF-related matrix-associated actin-dependent regulator of chromatin subfamily A member 5	-0.148479	-0.123799	-0.136086		44.39	20.217	90	93	24	29	16	21	128540000	126030000	324670000	374020000	39.9	>sp|O60264|SMCA5_HUMAN SWI/SNF-related matrix-associated actin-dependent regulator of chromatin subfamily A member 5 OS=Homo sapiens GN=SMARCA5 PE=1 SV=1
Q9H6S0	YTHDC2	Probable ATP-dependent RNA helicase YTHDC2	-0.38659	0.0774521	-0.135992		18.033	16.06	17	21	2	12	2	12	1670400	2049300	26029000	26405000	12.1	>sp|Q9H6S0|YTDC2_HUMAN Probable ATP-dependent RNA helicase YTHDC2 OS=Homo sapiens GN=YTHDC2 PE=1 SV=2
P46939	UTRN	Utrophin	-0.153286	-0.118759	-0.135919		25.152	19.488	285	300	89	95	88	91	392130000	360250000	1128800000	1449500000	45.2	>sp|P46939|UTRO_HUMAN Utrophin OS=Homo sapiens GN=UTRN PE=1 SV=2
Q9NTG7	SIRT3	NAD-dependent protein deacetylase sirtuin-3, mitochondrial	-0.0472592	-0.23008	-0.135776		12.067	17.929	10	5	3	2	3	2	8608400	7332900	7036600	9431900	17.5	>sp|Q9NTG7|SIR3_HUMAN NAD-dependent protein deacetylase sirtuin-3, mitochondrial OS=Homo sapiens GN=SIRT3 PE=1 SV=2
Q92896	GLG1	Golgi apparatus protein 1	-0.0966667	-0.175429	-0.13551		18.298	19.37	207	155	41	34	41	34	465950000	432260000	754080000	948130000	50.8	>sp|Q92896|GSLG1_HUMAN Golgi apparatus protein 1 OS=Homo sapiens GN=GLG1 PE=1 SV=2
Q15388	TOMM20	Mitochondrial import receptor subunit TOM20 homolog	-0.160275	-0.110497	-0.135171		14.533	8.7387	27	12	3	3	3	3	59358000	59914000	197760000	244050000	35.9	>sp|Q15388|TOM20_HUMAN Mitochondrial import receptor subunit TOM20 homolog OS=Homo sapiens GN=TOMM20 PE=1 SV=1
O14672	ADAM10	Disintegrin and metalloproteinase domain-containing protein 10	-0.245374	-0.032524	-0.135027		22.569	14.188	14	18	7	9	7	9	17112000	16315000	25534000	30454000	24.9	>sp|O14672|ADA10_HUMAN Disintegrin and metalloproteinase domain-containing protein 10 OS=Homo sapiens GN=ADAM10 PE=1 SV=1
P18827	SDC1	Syndecan-1	-0.487589	0.149025	-0.134449		64.452	35.548	19	21	5	5	5	5	67171000	54418000	101650000	112490000	16.1	>sp|P18827|SDC1_HUMAN Syndecan-1 OS=Homo sapiens GN=SDC1 PE=1 SV=3
O60716	CTNND1	Catenin delta-1	-0.181675	-0.0885487	-0.134361		21.749	17.963	380	292	45	40	45	40	1285100000	1322600000	2756900000	3317000000	62.8	>sp|O60716|CTND1_HUMAN Catenin delta-1 OS=Homo sapiens GN=CTNND1 PE=1 SV=1
Q9P0L0	VAPA	Vesicle-associated membrane protein-associated protein A	-0.13711	-0.130931	-0.134017		20.315	12.8	217	191	12	13	11	12	1654700000	1607200000	3326600000	4067400000	61	>sp|Q9P0L0|VAPA_HUMAN Vesicle-associated membrane protein-associated protein A OS=Homo sapiens GN=VAPA PE=1 SV=3
Q9NQ94	A1CF	APOBEC1 complementation factor	-0.137241	-0.130535	-0.133884		19.359	29.525	116	100	25	24	24	23	239890000	265160000	447950000	537660000	55.9	>sp|Q9NQ94|A1CF_HUMAN APOBEC1 complementation factor OS=Homo sapiens GN=A1CF PE=1 SV=1
Q9HBH5	RDH14	Retinol dehydrogenase 14	-0.206393	-0.0644689	-0.133687		18.652	17.056	13	17	6	5	6	5	18275000	16491000	34503000	41886000	32.7	>sp|Q9HBH5|RDH14_HUMAN Retinol dehydrogenase 14 OS=Homo sapiens GN=RDH14 PE=1 SV=1
Q6NSJ5	LRRC8E	Leucine-rich repeat-containing protein 8E	-0.109294	-0.158079	-0.13348		13.697	19.251	7	5	2	4	2	3	3059800	3007700	10219000	14494000	9.2	>sp|Q6NSJ5|LRC8E_HUMAN Leucine-rich repeat-containing protein 8E OS=Homo sapiens GN=LRRC8E PE=2 SV=2
Q7Z3K3	POGZ	Pogo transposable element with ZNF domain	-0.110497	-0.156655	-0.133391		19.214	31.994	40	39	19	15	19	15	49960000	49028000	78579000	90245000	29.6	>sp|Q7Z3K3|POGZ_HUMAN Pogo transposable element with ZNF domain OS=Homo sapiens GN=POGZ PE=1 SV=2
Q07954	LRP1	Prolow-density lipoprotein receptor-related protein 1	-0.245739	-0.0284277	-0.132996		21.422	25.404	133	133	52	51	52	51	157430000	167310000	405020000	442730000	20.6	>sp|Q07954|LRP1_HUMAN Prolow-density lipoprotein receptor-related protein 1 OS=Homo sapiens GN=LRP1 PE=1 SV=2
O60244	MED14	Mediator of RNA polymerase II transcription subunit 14	-0.122606	-0.143002	-0.132768		20.13	21.22	19	20	8	6	8	6	13234000	12094000	44537000	59680000	14.6	>sp|O60244|MED14_HUMAN Mediator of RNA polymerase II transcription subunit 14 OS=Homo sapiens GN=MED14 PE=1 SV=2
O00471	EXOC5	Exocyst complex component 5	-0.0640551	-0.204516	-0.132577		24.678	16.652	10	18	8	13	8	13	18700000	13085000	149200000	72605000	27	>sp|O00471|EXOC5_HUMAN Exocyst complex component 5 OS=Homo sapiens GN=EXOC5 PE=1 SV=1
P51114	FXR1	Fragile X mental retardation syndrome-related protein 1	-0.325847	0.0380804	-0.132438		23.558	24.514	66	67	21	21	18	18	286490000	139660000	666270000	573090000	46.2	>sp|P51114|FXR1_HUMAN Fragile X mental retardation syndrome-related protein 1 OS=Homo sapiens GN=FXR1 PE=1 SV=3
P31942	HNRNPH3	Heterogeneous nuclear ribonucleoprotein H3	-0.127765	-0.136323	-0.132038		20.814	20.983	156	119	11	9	11	9	765530000	777400000	1893200000	3339300000	57.8	>sp|P31942|HNRH3_HUMAN Heterogeneous nuclear ribonucleoprotein H3 OS=Homo sapiens GN=HNRNPH3 PE=1 SV=2
Q9P0J0	NDUFA13	NADH dehydrogenase [ubiquinone] 1 alpha subcomplex subunit 13	-0.242206	-0.0291349	-0.131741		24.17	24.116	50	59	10	9	10	9	183150000	187080000	634300000	720510000	63.2	>sp|Q9P0J0|NDUAD_HUMAN NADH dehydrogenase [ubiquinone] 1 alpha subcomplex subunit 13 OS=Homo sapiens GN=NDUFA13 PE=1 SV=3
Q00839	HNRNPU	Heterogeneous nuclear ribonucleoprotein U	-0.125651	-0.137504	-0.131565		23.39	35.895	744	558	39	33	39	33	9432200000	8695700000	23602000000	29221000000	48.7	>sp|Q00839|HNRPU_HUMAN Heterogeneous nuclear ribonucleoprotein U OS=Homo sapiens GN=HNRNPU PE=1 SV=6
P62847	RPS24	40S ribosomal protein S24	-0.304745	0.0230939	-0.131533		13.784	10.344	46	43	4	6	4	6	143260000	154390000	804350000	801900000	40.6	>sp|P62847|RS24_HUMAN 40S ribosomal protein S24 OS=Homo sapiens GN=RPS24 PE=1 SV=1
Q969Q5	RAB24	Ras-related protein Rab-24	-0.249506	-0.0223323	-0.131452		21.112	4.5427	3	2	3	2	3	2	3903100	3618000	4745300	5794700	19.7	>sp|Q969Q5|RAB24_HUMAN Ras-related protein Rab-24 OS=Homo sapiens GN=RAB24 PE=1 SV=1
P62888	RPL30	60S ribosomal protein L30	-0.168899	-0.0949116	-0.131431		22.001	18.5	67	69	6	6	6	6	370900000	363490000	1021800000	1198600000	58.3	>sp|P62888|RL30_HUMAN 60S ribosomal protein L30 OS=Homo sapiens GN=RPL30 PE=1 SV=2
Q9P032	NDUFAF4	NADH dehydrogenase [ubiquinone] 1 alpha subcomplex assembly factor 4	-0.184978	-0.0794293	-0.131239		13.297	31.694	34	38	8	10	8	10	159770000	157260000	518600000	632920000	53.1	>sp|Q9P032|NDUF4_HUMAN NADH dehydrogenase [ubiquinone] 1 alpha subcomplex assembly factor 4 OS=Homo sapiens GN=NDUFAF4 PE=1 SV=1
P07954	FH	Fumarate hydratase, mitochondrial	-0.28404	0.00698516	-0.131202		33.347	18.303	217	224	21	23	21	23	1267900000	1334500000	3613400000	4039600000	63.7	>sp|P07954|FUMH_HUMAN Fumarate hydratase, mitochondrial OS=Homo sapiens GN=FH PE=1 SV=3
Q9Y3U8	RPL36	60S ribosomal protein L36	-0.290306	0.0123007	-0.131083		12.393	30.305	42	54	5	4	5	4	527540000	544060000	1438400000	1652200000	36.2	>sp|Q9Y3U8|RL36_HUMAN 60S ribosomal protein L36 OS=Homo sapiens GN=RPL36 PE=1 SV=3
Q9NVH0	EXD2	Exonuclease 3-5 domain-containing protein 2	-0.213378	-0.0531114	-0.131021		19.707	20.824	8	6	4	2	4	2	1332800	1541100	2695200	2923700	13.8	>sp|Q9NVH0|EXD2_HUMAN Exonuclease 3-5 domain-containing protein 2 OS=Homo sapiens GN=EXD2 PE=1 SV=2
Q15041	ARL6IP1	ADP-ribosylation factor-like protein 6-interacting protein 1	-0.211261	-0.0549179	-0.130973		65.423	15.33	17	18	3	2	3	2	149210000	159850000	833930000	963830000	22.7	>sp|Q15041|AR6P1_HUMAN ADP-ribosylation factor-like protein 6-interacting protein 1 OS=Homo sapiens GN=ARL6IP1 PE=1 SV=2
P62873	GNB1	Guanine nucleotide-binding protein G(I)/G(S)/G(T) subunit beta-1	-0.0117819	-0.260628	-0.130846		15.597	22.485	218	135	15	15	8	9	1248000000	1069600000	2031200000	2621900000	69.4	>sp|P62873|GBB1_HUMAN Guanine nucleotide-binding protein G(I)/G(S)/G(T) subunit beta-1 OS=Homo sapiens GN=GNB1 PE=1 SV=3
O75843	AP1G2	AP-1 complex subunit gamma-like 2	-0.288181	0.0110791	-0.130805		17.871	18.594	8	7	4	2	4	2	3376700	2781500	26789000	31427000	11.8	>sp|O75843|AP1G2_HUMAN AP-1 complex subunit gamma-like 2 OS=Homo sapiens GN=AP1G2 PE=1 SV=1
P32322	PYCR1	Pyrroline-5-carboxylate reductase 1, mitochondrial	-0.304394	0.0242085	-0.130757		20.853	18.304	97	109	15	13	14	12	515070000	484400000	1348300000	1536500000	58.6	>sp|P32322|P5CR1_HUMAN Pyrroline-5-carboxylate reductase 1, mitochondrial OS=Homo sapiens GN=PYCR1 PE=1 SV=2
P21291	CSRP1	Cysteine and glycine-rich protein 1	-0.135272	-0.12618	-0.130719		24.339	24.778	48	27	8	7	8	7	116120000	117000000	127470000	142300000	56	>sp|P21291|CSRP1_HUMAN Cysteine and glycine-rich protein 1 OS=Homo sapiens GN=CSRP1 PE=1 SV=3
Q6P1X6	C8orf82	UPF0598 protein C8orf82	-0.23585	-0.0321009	-0.130381		8.387	25.586	15	9	4	3	4	3	19794000	20032000	40720000	45937000	30.1	>sp|Q6P1X6|CH082_HUMAN UPF0598 protein C8orf82 OS=Homo sapiens GN=C8orf82 PE=1 SV=2
P78368	CSNK1G2	Casein kinase I isoform gamma-2	-0.131589	-0.128425	-0.130007		19.272	83.919	7	4	4	3	4	3	3937300	4149300	5791100	6047100	26.7	>sp|P78368|KC1G2_HUMAN Casein kinase I isoform gamma-2 OS=Homo sapiens GN=CSNK1G2 PE=1 SV=1
Q9UQB8	BAIAP2	Brain-specific angiogenesis inhibitor 1-associated protein 2	-0.191563	-0.0706641	-0.129847		18.504	14.691	15	22	6	9	6	9	10171000	9558600	57946000	61938000	19.6	>sp|Q9UQB8|BAIP2_HUMAN Brain-specific angiogenesis inhibitor 1-associated protein 2 OS=Homo sapiens GN=BAIAP2 PE=1 SV=1
Q8NFH5	NUP35	Nucleoporin NUP53	-0.0958569	-0.1644	-0.129721		27.064	17.276	54	41	10	9	10	9	159830000	148760000	313760000	371210000	50.3	>sp|Q8NFH5|NUP53_HUMAN Nucleoporin NUP53 OS=Homo sapiens GN=NUP35 PE=1 SV=1
Q9Y6G3	MRPL42	39S ribosomal protein L42, mitochondrial	0.00731853	-0.27965	-0.129042		7.9222	26.891	4	16	4	2	4	2	24481000	25707000	74577000	107390000	36.6	>sp|Q9Y6G3|RM42_HUMAN 39S ribosomal protein L42, mitochondrial OS=Homo sapiens GN=MRPL42 PE=1 SV=1
Q8NFH4	NUP37	Nucleoporin Nup37	-0.0775164	-0.182184	-0.128901		13.578	19.691	22	23	8	6	8	6	67877000	61896000	79380000	95052000	32.8	>sp|Q8NFH4|NUP37_HUMAN Nucleoporin Nup37 OS=Homo sapiens GN=NUP37 PE=1 SV=1
Q9BZF9	UACA	Uveal autoantigen with coiled-coil domains and ankyrin repeats	0.0138585	-0.287354	-0.128901		15.862	27.261	18	21	12	10	12	10	14317000	12070000	106320000	101540000	19.8	>sp|Q9BZF9|UACA_HUMAN Uveal autoantigen with coiled-coil domains and ankyrin repeats OS=Homo sapiens GN=UACA PE=1 SV=2
P21333	FLNA	Filamin-A	-0.171463	-0.0867838	-0.128502		21.209	15.649	1050	1083	104	108	103	105	6034300000	6158100000	14823000000	17871000000	67.7	>sp|P21333|FLNA_HUMAN Filamin-A OS=Homo sapiens GN=FLNA PE=1 SV=4
Q15526	SURF1	Surfeit locus protein 1	-0.343237	0.0584579	-0.128454		13.204	16.481	4	10	2	2	2	2	3273100	3206500	15397000	16987000	8.7	>sp|Q15526|SURF1_HUMAN Surfeit locus protein 1 OS=Homo sapiens GN=SURF1 PE=1 SV=1
P53794	SLC5A3	Sodium/myo-inositol cotransporter	-0.713872	0.28692	-0.128381		31.034	21.8	4	3	3	2	3	2	1795300	2423500	6437900	5492900	8.9	>sp|P53794|SC5A3_HUMAN Sodium/myo-inositol cotransporter OS=Homo sapiens GN=SLC5A3 PE=3 SV=2
Q96EE3	SEH1L	Nucleoporin SEH1	-0.0816123	-0.176323	-0.12819		38.725	20.466	42	40	9	7	9	7	48374000	43133000	199890000	247610000	43.3	>sp|Q96EE3|SEH1_HUMAN Nucleoporin SEH1 OS=Homo sapiens GN=SEH1L PE=1 SV=3
Q9NPD3	EXOSC4	Exosome complex component RRP41	-0.107286	-0.14939	-0.128184		16.994	67.065	29	30	7	6	7	6	53675000	49012000	189870000	220260000	33.5	>sp|Q9NPD3|EXOS4_HUMAN Exosome complex component RRP41 OS=Homo sapiens GN=EXOSC4 PE=1 SV=3
Q9BYK8	HELZ2	Helicase with zinc finger domain 2	-0.0924781	-0.164658	-0.128117		30.376	30.51	4	3	3	2	3	2	3431900	2809700	4013500	4703600	3.2	>sp|Q9BYK8|HELZ2_HUMAN Helicase with zinc finger domain 2 OS=Homo sapiens GN=HELZ2 PE=1 SV=6
Q96HW7	INTS4	Integrator complex subunit 4	-0.100709	-0.155879	-0.12803		15.437	20.364	20	21	6	11	6	11	2908000	2655600	16507000	62396000	20	>sp|Q96HW7|INT4_HUMAN Integrator complex subunit 4 OS=Homo sapiens GN=INTS4 PE=1 SV=2
Q9BSH4	TACO1	Translational activator of cytochrome c oxidase 1	-0.177727	-0.0799754	-0.128023		23.547	27.571	25	30	6	9	6	9	64513000	64741000	89065000	120300000	39.7	>sp|Q9BSH4|TACO1_HUMAN Translational activator of cytochrome c oxidase 1 OS=Homo sapiens GN=TACO1 PE=1 SV=1
O00767	SCD	Acyl-CoA desaturase	-0.387694	0.0924633	-0.127731		13.144	10.465	10	13	2	2	2	2	47321000	76876000	344390000	359270000	10.6	>sp|O00767|ACOD_HUMAN Acyl-CoA desaturase OS=Homo sapiens GN=SCD PE=1 SV=2
P30837	ALDH1B1	Aldehyde dehydrogenase X, mitochondrial	-0.187134	-0.0706641	-0.127724		19.319	14.364	134	116	19	17	19	17	382340000	386910000	966210000	1145000000	47	>sp|P30837|AL1B1_HUMAN Aldehyde dehydrogenase X, mitochondrial OS=Homo sapiens GN=ALDH1B1 PE=1 SV=3
Q9H0D6	XRN2	5-3 exoribonuclease 2	-0.0487942	-0.211137	-0.127683		23.712	27.003	242	220	36	33	36	33	631360000	582180000	1144400000	1467200000	50.3	>sp|Q9H0D6|XRN2_HUMAN 5-3 exoribonuclease 2 OS=Homo sapiens GN=XRN2 PE=1 SV=1
Q9NS00	C1GALT1	Glycoprotein-N-acetylgalactosamine 3-beta-galactosyltransferase 1	-0.090718	-0.165558	-0.127653		24.457	27.119	5	10	4	4	4	4	3623700	4397400	20862000	22805000	19.6	>sp|Q9NS00|C1GLT_HUMAN Glycoprotein-N-acetylgalactosamine 3-beta-galactosyltransferase 1 OS=Homo sapiens GN=C1GALT1 PE=1 SV=1
P63096	GNAI1	Guanine nucleotide-binding protein G(i) subunit alpha-1	-0.0430645	-0.216858	-0.127346		11.093	24.949	5	14	2	3	2	3	9133100	9382900	32382000	43854000	29.9	>sp|P63096|GNAI1_HUMAN Guanine nucleotide-binding protein G(i) subunit alpha-1 OS=Homo sapiens GN=GNAI1 PE=1 SV=2
O75369	FLNB	Filamin-B	-0.169155	-0.0866479	-0.127312		25.187	27.91	1035	974	130	128	119	117	4281700000	4127800000	12150000000	14071000000	74.2	>sp|O75369|FLNB_HUMAN Filamin-B OS=Homo sapiens GN=FLNB PE=1 SV=2
Q9H0U4	RAB1B	Ras-related protein Rab-1B	-0.151339	-0.103128	-0.127032		28.293	14.046	208	231	13	14	6	7	3053600000	2669300000	7355700000	8937400000	73.6	>sp|Q9H0U4|RAB1B_HUMAN Ras-related protein Rab-1B OS=Homo sapiens GN=RAB1B PE=1 SV=1
Q07021	C1QBP	Complement component 1 Q subcomponent-binding protein, mitochondrial	-0.110764	-0.143263	-0.126922		21.531	15.702	298	181	10	9	10	9	2703300000	2667500000	4426000000	5627000000	52.1	>sp|Q07021|C1QBP_HUMAN Complement component 1 Q subcomponent-binding protein, mitochondrial OS=Homo sapiens GN=C1QBP PE=1 SV=1
Q02818	NUCB1	Nucleobindin-1	-0.155749	-0.0978804	-0.126525		21.256	39.99	109	91	23	24	22	23	286860000	294300000	567190000	798430000	64.4	>sp|Q02818|NUCB1_HUMAN Nucleobindin-1 OS=Homo sapiens GN=NUCB1 PE=1 SV=4
P43155	CRAT	Carnitine O-acetyltransferase	-0.332507	0.054707	-0.125948		20.378	17.152	41	75	12	18	12	18	72448000	83679000	530970000	596160000	36.4	>sp|P43155|CACP_HUMAN Carnitine O-acetyltransferase OS=Homo sapiens GN=CRAT PE=1 SV=5
Q12959	DLG1	Disks large homolog 1	-0.140517	-0.111298	-0.125834		15.862	18.75	63	47	16	16	15	14	97333000	96489000	110540000	128890000	39	>sp|Q12959|DLG1_HUMAN Disks large homolog 1 OS=Homo sapiens GN=DLG1 PE=1 SV=2
O60524	NEMF	Nuclear export mediator factor NEMF	-0.0476779	-0.207393	-0.125327		17.023	19.511	7	6	4	3	4	3	5072000	4426700	9862200	12179000	7.9	>sp|O60524|NEMF_HUMAN Nuclear export mediator factor NEMF OS=Homo sapiens GN=NEMF PE=1 SV=4
Q6P2E9	EDC4	Enhancer of mRNA-decapping protein 4	-0.411426	0.113411	-0.125272		29.577	20.838	224	182	40	38	40	38	562990000	670330000	1585300000	1716700000	52.5	>sp|Q6P2E9|EDC4_HUMAN Enhancer of mRNA-decapping protein 4 OS=Homo sapiens GN=EDC4 PE=1 SV=1
P15151	PVR	Poliovirus receptor	-0.0936954	-0.156138	-0.124579		18.412	13.952	57	56	5	5	5	5	223420000	206400000	495970000	585880000	15.1	>sp|P15151|PVR_HUMAN Poliovirus receptor OS=Homo sapiens GN=PVR PE=1 SV=2
Q96L91	EP400	E1A-binding protein p400	0.00631837	-0.268315	-0.124473		48.808	18.156	18	26	8	13	8	13	8130000	5840500	23103000	28322000	8.8	>sp|Q96L91|EP400_HUMAN E1A-binding protein p400 OS=Homo sapiens GN=EP400 PE=1 SV=4
Q13769	THOC5	THO complex subunit 5 homolog	-0.0441843	-0.209142	-0.124307		26.854	19.117	53	56	14	13	14	13	97469000	83395000	254520000	320680000	32.8	>sp|Q13769|THOC5_HUMAN THO complex subunit 5 homolog OS=Homo sapiens GN=THOC5 PE=1 SV=2
P10619	CTSA	Lysosomal protective protein	-0.0335111	-0.221196	-0.124304		18.861	16.218	77	74	11	9	11	9	593680000	500490000	1587700000	2000600000	25.2	>sp|P10619|PPGB_HUMAN Lysosomal protective protein OS=Homo sapiens GN=CTSA PE=1 SV=2
Q86Y82	STX12	Syntaxin-12	-0.100305	-0.147698	-0.123807		15.665	13.166	57	49	9	9	9	9	150820000	139270000	279610000	340610000	52.2	>sp|Q86Y82|STX12_HUMAN Syntaxin-12 OS=Homo sapiens GN=STX12 PE=1 SV=1
Q9BRX8	FAM213A	Redox-regulatory protein FAM213A	-0.275961	0.0142664	-0.123561		15.401	28.013	89	95	9	8	9	8	272560000	294350000	1244200000	1380400000	34.9	>sp|Q9BRX8|F213A_HUMAN Redox-regulatory protein FAM213A OS=Homo sapiens GN=FAM213A PE=1 SV=3
P14927	UQCRB	Cytochrome b-c1 complex subunit 7	-0.135798	-0.110898	-0.123294		17.155	13.869	43	57	8	7	8	7	302100000	299240000	782520000	942600000	64.9	>sp|P14927|QCR7_HUMAN Cytochrome b-c1 complex subunit 7 OS=Homo sapiens GN=UQCRB PE=1 SV=2
Q08945	SSRP1	FACT complex subunit SSRP1	-0.212134	-0.0394191	-0.123193		29.109	26.213	179	143	25	21	25	21	647650000	652390000	1278500000	1496500000	47.4	>sp|Q08945|SSRP1_HUMAN FACT complex subunit SSRP1 OS=Homo sapiens GN=SSRP1 PE=1 SV=1
P01024	C3	Complement C3	-0.199751	-0.0501882	-0.123032		29.34	32.114	74	86	24	35	21	30	60050000	57351000	262340000	264610000	35.1	>sp|P01024|CO3_HUMAN Complement C3 OS=Homo sapiens GN=C3 PE=1 SV=2
Q9NYF8	BCLAF1	Bcl-2-associated transcription factor 1	-0.0923428	-0.153676	-0.122683		39.657	32.37	147	112	23	22	23	22	668230000	642110000	1651300000	2036900000	31.5	>sp|Q9NYF8|BCLF1_HUMAN Bcl-2-associated transcription factor 1 OS=Homo sapiens GN=BCLAF1 PE=1 SV=2
P07237	P4HB	Protein disulfide-isomerase	-0.0213375	-0.23131	-0.122507		31.278	29.158	649	662	42	41	42	41	14691000000	12708000000	44638000000	57716000000	84.6	>sp|P07237|PDIA1_HUMAN Protein disulfide-isomerase OS=Homo sapiens GN=P4HB PE=1 SV=3
Q9H553	ALG2	Alpha-1,3/1,6-mannosyltransferase ALG2	-0.239642	-0.0139267	-0.122375		32.781	16.393	57	58	14	15	14	15	106070000	109590000	367430000	515310000	40.9	>sp|Q9H553|ALG2_HUMAN Alpha-1,3/1,6-mannosyltransferase ALG2 OS=Homo sapiens GN=ALG2 PE=1 SV=1
Q8TCG2	PI4K2B	Phosphatidylinositol 4-kinase type 2-beta	-0.142871	-0.101919	-0.12225		20.939	16.081	5	3	3	3	3	3	4059700	4440600	9024900	18283000	14.6	>sp|Q8TCG2|P4K2B_HUMAN Phosphatidylinositol 4-kinase type 2-beta OS=Homo sapiens GN=PI4K2B PE=1 SV=1
Q92499	DDX1	ATP-dependent RNA helicase DDX1	-0.239887	-0.0119249	-0.121408		19.438	21.802	285	220	42	32	42	32	962530000	1455200000	2176300000	2587500000	67.4	>sp|Q92499|DDX1_HUMAN ATP-dependent RNA helicase DDX1 OS=Homo sapiens GN=DDX1 PE=1 SV=2
Q96KQ7	EHMT2	Histone-lysine N-methyltransferase EHMT2	-0.0972063	-0.145482	-0.121142		15.677	15.3	11	13	8	8	8	8	16074000	14725000	29668000	38678000	16.1	>sp|Q96KQ7|EHMT2_HUMAN Histone-lysine N-methyltransferase EHMT2 OS=Homo sapiens GN=EHMT2 PE=1 SV=3
Q01780	EXOSC10	Exosome component 10	-0.122739	-0.11929	-0.121013		25.161	18.8	70	60	20	23	20	23	102560000	96169000	199760000	238000000	42.5	>sp|Q01780|EXOSX_HUMAN Exosome component 10 OS=Homo sapiens GN=EXOSC10 PE=1 SV=2
P20671	HIST1H2AD	Histone H2A type 1-D	-0.0816123	-0.161307	-0.12091		20.957	17.642	57	33	8	7	0	0	20513000000	17373000000	9618400000	12159000000	46.2	>sp|P20671|H2A1D_HUMAN Histone H2A type 1-D OS=Homo sapiens GN=HIST1H2AD PE=1 SV=2
P55157	MTTP	Microsomal triglyceride transfer protein large subunit	-0.0301242	-0.216858	-0.120472		15.962	16.094	398	500	46	42	46	42	2930000000	2636100000	10054000000	13292000000	54.4	>sp|P55157|MTP_HUMAN Microsomal triglyceride transfer protein large subunit OS=Homo sapiens GN=MTTP PE=1 SV=1
Q9P2D1	CHD7	Chromodomain-helicase-DNA-binding protein 7	-0.114767	-0.125387	-0.120067		30.98	33.862	7	12	4	8	3	7	2489300	2233000	15333000	19355000	5.2	>sp|Q9P2D1|CHD7_HUMAN Chromodomain-helicase-DNA-binding protein 7 OS=Homo sapiens GN=CHD7 PE=1 SV=3
Q9P0M6	H2AFY2	Core histone macro-H2A.2	-0.129481	-0.109962	-0.119689		21.666	18.706	33	27	9	8	9	8	63203000	59546000	160280000	191610000	45.7	>sp|Q9P0M6|H2AW_HUMAN Core histone macro-H2A.2 OS=Homo sapiens GN=H2AFY2 PE=1 SV=3
Q8NHQ9	DDX55	ATP-dependent RNA helicase DDX55	-0.0497701	-0.192825	-0.119525		10.883	24.294	4	8	3	4	3	4	1826500	1661300	9026000	11929000	16.3	>sp|Q8NHQ9|DDX55_HUMAN ATP-dependent RNA helicase DDX55 OS=Homo sapiens GN=DDX55 PE=1 SV=3
[truncated: 3,462 more rows]
